# Supplementary material for: The Candida albicans transcription factor Cas5 couples stress responses, drug resistance and cell cycle regulation
Source: Nat Commun. 2017 Sep 11;8:499. doi: 10.1038/s41467-017-00547-y (PMC5593949; doi:10.1038/s41467-017-00547-y)
Supplement: Supplementary file 2 — Supplementary Data 1 [file 41467_2017_547_MOESM2_ESM.xlsx]

## Sheet: Legend
Supplementary Data 1 - RNA PolII ChIP-seq data comparing wild type and cas5∆/cas5∆ mutant strains under basal condition.
Sheet 1: Normalized RNA PolII occupancy of differentially bound genes between cas5∆/cas5∆ mutant and the wild type strain under basal condition.
The ORF numbers under gene names are derived from Genome Assembly 21.
All genes with greater than 1.5-fold change in RNA PolII binding are listed.
A negative Log2FC indicates that the gene was bound by RNA PolII at higher levels in the wild type strain than in the cas5∆/cas5∆.
Sheet 2: GO processes of all genes with increased RNA PolII occupancy in the cas5∆/cas5∆ mutant in comparison to the wild type strain under basal condition.
The gene names are derived from Genome Assembly 22.
The genes are categorized by processes using CGD GO Term finder function.
Only GO processes with a corrected P-value of < 0.1 are included.
Sheet 3: GO processes of all genes with decreased RNA PolII occupancy in the cas5∆/cas5∆ mutant in comparison to the wild type strain under basal condition.
The gene names are derived from Genome Assembly 22.
The genes are categorized by processes using CGD GO Term finder function.
Only GO processes with a corrected P-value of < 0.1 are included.
Sheet 4: GO components of all genes with increased RNA PolII occupancy in the cas5∆/cas5∆ mutant in comparison to the wild type strain under basal condition.
The gene names are derived from Genome Assembly 22
The genes are categorized by processes using CGD GO Term finder function.
Only GO components with a corrected P-value of < 0.1 are included.
Sheet 5: GO components of all genes with decreased RNA PolII occupancy in the cas5∆/cas5∆ mutant in comparison to the wild type strain under basal condition.
The gene names are derived from Genome Assembly 22
The genes are categorized by processes using CGD GO Term finder function.
Only GO components with a corrected P-value of < 0.1 are included.
Sheet 6: List of genes with cell wall, cell periphery, or cell membrane GO components.
The gene names are derived from Genome Assembly 22.
Sheet 7: KEGG analysis of differentially bound genes in the cas5∆/cas5∆ mutant in comparison to the wild type strain under basal condition.
DBGs are differentially bound genes defined by genes with greater than 1.5 fold difference in PolII ChIPseq signals between the cas5∆/cas5∆ mutant and the wild type strain.

## Sheet: 1. PolII occupancy
Normalized RNA PolII occupancy of differentially bound genes between cas5∆/cas5∆ mutant and the wild type strain under basal condition.
cas5∆/WT UP	PolII level		Fold change	Log2FC			cas5∆/WT DOWN	PolII level		Fold change	Log2FC
Gene names	WT	cas5∆/cas5∆	[cas5∆/WT]				Gene names	WT	cas5∆/cas5∆	[cas5∆/WT]
PHO87	2.328	28.4973	11.7781	3.55804			orf19.4380.1	16.1001	10.7766	0.671391	-0.574775
SNZ1	19.5858	106.095	5.39451	2.43149			PDR16	15.1907	10.1634	0.671218	-0.575146
orf19.4921.1	7.8591	42.1952	5.31407	2.40982			orf19.1655.3	34.5093	23.0905	0.670066	-0.577626
GCV2	14.6156	74.9037	5.09688	2.34962			orf19.1564	33.893	22.6766	0.670038	-0.577685
FTR2	7.1745	33.1603	4.57218	2.19288			STF2	26.9694	18.0324	0.669849	-0.578093
ALS1	6.8589	22.0603	3.18445	1.67105			orf19.3644	20.5983	13.7496	0.669118	-0.579668
CRD2	10.5941	33.369	3.12967	1.64601			FET34	35.7471	23.8516	0.66816	-0.581734
SNO1	13.7796	42.5697	3.07427	1.62025			orf19.6177	25.7696	17.1455	0.666632	-0.585038
TPO3	14.7584	44.9296	3.03058	1.59959			SIM1	94.9505	63.2179	0.66615	-0.586081
orf19.6805	4.4479	13.3868	2.9655	1.56828			orf19.7404	17.8161	11.7587	0.661902	-0.595311
orf19.6316.4	4.7101	13.9657	2.9242	1.54804			orf19.2132	21.4991	14.1917	0.66168	-0.595794
GDH3	25.8919	72.1595	2.78008	1.47513			TPS2	22.65	14.9144	0.659974	-0.59952
HNM4	4.4966	11.8516	2.6001	1.37856			orf19.1246	25.3781	16.7016	0.659453	-0.600659
HAP41	17.854	46.1226	2.5745	1.36429			orf19.6113	15.8867	10.4236	0.658272	-0.603244
orf19.4789	5.6941	14.7098	2.55601	1.3539			LAT1	76.181	50.0889	0.657948	-0.603955
orf19.4814	6.4783	16.6368	2.54424	1.34724			orf19.1391	19.0178	12.4552	0.656728	-0.606632
KAR4	66.3242	168.696	2.54118	1.3455			orf19.2163	24.1354	15.766	0.654662	-0.611177
CUP9	22.9972	58.2602	2.52672	1.33727			TLO9	18.7508	12.232	0.65419	-0.612219
FGR46	64.6097	155.232	2.40044	1.2633			SDS24	25.2653	16.4873	0.653937	-0.612777
orf19.1800	8.0093	18.8122	2.33216	1.22167			RHR2	94.0389	61.3864	0.653146	-0.614524
orf19.5364	37.1457	85.71	2.30389	1.20407			orf19.6951	20.8784	13.5854	0.652357	-0.616267
GCV1	15.3478	34.9404	2.26831	1.18162			SOD3	87.8984	57.208	0.651239	-0.618741
BUL1	4.6682	10.683	2.26144	1.17724			orf19.3869	77.1799	50.226	0.651217	-0.618789
SEN2	36.6245	82.6926	2.25442	1.17276			orf19.5755	17.4468	11.3012	0.64976	-0.622022
CAM1	57.1361	128.437	2.24574	1.16719			MET4	21.4397	13.8545	0.64785	-0.626268
HOL1	9.9353	22.4296	2.24504	1.16674			orf19.4824	28.5029	18.3836	0.646214	-0.629916
orf19.7192	6.5294	14.7516	2.24026	1.16367			ACE2	26.8724	17.3149	0.645656	-0.631162
SEO1	7.7381	17.4222	2.23552	1.16061			TPK2	20.9049	13.3959	0.642512	-0.638205
orf19.4812	17.2828	38.6756	2.23069	1.15749			FTR1	60.157	38.5813	0.641939	-0.639493
CHA1	18.3923	40.7204	2.20743	1.14237			orf19.6737	18.2287	11.662	0.641726	-0.639971
orf19.4066	6.9154	15.1017	2.1669	1.11564			TPI1	184.276	118.162	0.641415	-0.640671
orf19.5905	17.0135	36.9204	2.16323	1.11319			HAP43	25.5256	16.3189	0.640723	-0.642228
ADE6	10.3359	22.449	2.16071	1.11151			orf19.6667	17.1983	10.975	0.640236	-0.643324
orf19.3810	12.9374	28.0538	2.15946	1.11067			orf19.3319	41.3437	26.4317	0.640187	-0.643436
ARC40	28.2039	60.9192	2.15586	1.10826			orf19.4942	69.0745	44.1171	0.639211	-0.645636
ACO1	71.9633	154.691	2.14799	1.10298			orf19.6114	72.8457	46.5257	0.639184	-0.645698
orf19.1180	65.6856	140.205	2.13276	1.09272			orf19.3364	33.1659	21.1453	0.638651	-0.6469
FMA1	16.9241	35.9459	2.11735	1.08226			orf19.1360.1	21.1564	13.4703	0.63841	-0.647445
ADE13	14.339	30.0638	2.08905	1.06285			ROB1	42.8642	27.3039	0.637831	-0.648754
SHM2	25.7724	53.9403	2.08872	1.06262			ECM4	17.4773	11.0715	0.635564	-0.653891
ASN1	40.2715	84.1737	2.08746	1.06175			orf19.2204	22.0156	13.9323	0.634498	-0.656313
orf19.4507	8.4114	17.6617	2.08681	1.0613			orf19.557	16.2799	10.2839	0.633942	-0.657578
orf19.2829	7.9574	16.6776	2.08226	1.05815			TFS1	34.8665	21.9847	0.631596	-0.662926
orf19.4949	124.573	257.911	2.0695	1.04928			HHT2	219.11	137.874	0.629414	-0.66792
orf19.7624	21.0497	43.6501	2.06859	1.04865			orf19.3073	79.1324	49.7572	0.629253	-0.668289
MIS11	39.3287	80.7763	2.0512	1.03647			GIN4	22.2211	13.8953	0.626999	-0.673466
orf19.1124	6.382	13.1214	2.03971	1.02836			orf19.2959.1	38.5606	24.0867	0.625616	-0.67665
WBP1	52.7564	107.689	2.03927	1.02805			HGT7	384.662	240.39	0.625036	-0.677989
ADE4	22.6179	45.8233	2.02146	1.0154			orf19.7199	20.8126	12.9412	0.623605	-0.681296
orf19.3517	62.4173	121.799	1.94985	0.963365			RIM8	29.8269	18.5424	0.622931	-0.682855
DEM1	21.6786	42.3132	1.94747	0.961602			VTC3	43.7793	27.0665	0.619119	-0.691712
orf19.5076.1	9.2873	18.1652	1.94574	0.960315			STB3	17.1648	10.5837	0.618814	-0.692422
orf19.1815	21.3062	41.3255	1.93521	0.95249			HHT21	258.59	159.886	0.618445	-0.693282
orf19.6366	17.3451	33.4855	1.92521	0.945017			HHF1	306.886	189.43	0.61739	-0.695746
orf19.1272	7.562	14.5302	1.90945	0.933157			PST3	54.05	33.3148	0.617078	-0.696474
orf19.7370	10.5368	20.0121	1.8908	0.919			CTR1	795.753	490.423	0.616349	-0.69818
orf19.1998	12.4073	23.4831	1.88555	0.914983			SLK19	29.2724	17.942	0.61425	-0.703102
orf19.6731	29.4578	55.5869	1.884	0.913799			orf19.2372	17.6754	10.8046	0.613466	-0.704945
ADE17	27.5373	51.4823	1.8664	0.900259			orf19.5472	114.361	70.1062	0.613365	-0.705183
orf19.3175	23.2195	43.4083	1.86575	0.899754			PGI1	70.6188	43.0261	0.609825	-0.713533
ADE1	10.8092	20.1791	1.8589	0.894448			PRX1	31.2959	18.9141	0.605624	-0.723507
orf19.1676	23.8742	44.2191	1.84862	0.886446			SEC61	60.0104	36.2694	0.605043	-0.724889
TRM12	7.2366	13.4596	1.84821	0.886131			HGT8	54.1125	32.6557	0.604209	-0.72688
LYS22	26.199	48.5	1.84798	0.885948			orf19.5469	108.861	65.7301	0.604162	-0.726993
orf19.6838	15.2413	28.1924	1.8442	0.882994			TOS1	78.5251	47.3231	0.603155	-0.7294
orf19.4017	8.3757	15.5152	1.84235	0.881547			orf19.3522	78.1078	46.988	0.602088	-0.731953
orf19.4705	10.4691	19.2999	1.83553	0.876197			orf19.3302	19.5164	11.666	0.599804	-0.737436
orf19.446.2	15.3472	28.2098	1.83268	0.873956			ISN1	18.9091	11.3015	0.599792	-0.737467
orf19.1968	101.507	185.483	1.82648	0.869064			orf19.4211	112.822	66.8049	0.592489	-0.755139
HPT1	21.3666	38.9528	1.81924	0.863332			CMK1	30.2606	17.865	0.591721	-0.757011
IMH3	40.8912	74.3839	1.81707	0.861614			MET10	20.0682	11.7861	0.589349	-0.762807
orf19.276	16.6647	30.3495	1.81629	0.860992			ERG3	22.0534	12.8975	0.586705	-0.769294
LEU4	21.3343	38.8271	1.81611	0.860854			TYE7	144.238	84.5261	0.586305	-0.770276
orf19.2637	20.0906	36.4888	1.81217	0.857718			PFK1	49.7102	29.0237	0.584693	-0.774248
orf19.4376	19.3055	34.9125	1.80426	0.851404			MET1	28.141	16.4012	0.584299	-0.77522
AIP2	17.3512	31.3475	1.80203	0.849619			NRG1	119.053	69.4698	0.583868	-0.776285
orf19.1030	7.4467	13.4807	1.79955	0.84764			orf19.5825.1	20.4869	11.8728	0.581574	-0.781966
SAM4	32.0193	57.3864	1.78978	0.83978			HHF22	330.403	191.525	0.579799	-0.786376
REI1	7.7477	13.8367	1.7759	0.828547			RNH35	31.9034	18.4319	0.57906	-0.788214
YKE2	10.0903	17.996	1.77581	0.828474			orf19.4532	21.643	12.4665	0.577956	-0.790968
orf19.6585	10.2745	18.2968	1.77327	0.826413			CTA2	43.0175	24.7777	0.576975	-0.79342
orf19.1610	6.2396	11.1354	1.77226	0.825588			ALD5	75.8661	43.2825	0.571077	-0.808243
orf19.1642	16.5169	29.2966	1.76908	0.822998			ZCF2	26.3644	14.9811	0.569864	-0.811311
GPX2	10.5385	18.6975	1.76693	0.821246			orf19.7519	22.2317	12.4922	0.563871	-0.826563
orf19.2386	9.5335	16.8705	1.76161	0.816897			BCY1	29.0061	16.3079	0.563727	-0.826931
DIP5	15.8616	27.9263	1.75586	0.812176			CDR1	39.6961	22.2866	0.562533	-0.829992
GAP6	31.4603	55.1504	1.75063	0.807874			ASM3	18.3255	10.2285	0.560555	-0.835073
orf19.1109	24.9589	43.7496	1.74986	0.807241			orf19.6118	41.0825	22.796	0.555964	-0.846936
orf19.5885	34.447	60.3062	1.74852	0.806136			CAR2	55.0568	30.4874	0.554554	-0.850601
ARO3	39.0318	68.3018	1.74799	0.805693			orf19.904	28.202	15.5072	0.551452	-0.858692
PGA45	6.8151	11.9757	1.74628	0.804285			orf19.3264.1	270.695	148.512	0.548798	-0.865652
orf19.7589	23.3752	40.891	1.74614	0.80417			CAT1	26.6984	14.5465	0.546544	-0.871591
DAD3	17.2654	30.208	1.74531	0.803483			DAK2	25.1271	13.6458	0.544882	-0.875983
NOG2	20.7941	36.3375	1.74391	0.802328			orf19.3998	87.5049	47.5436	0.543846	-0.878729
SDH2	52.97	92.2236	1.73966	0.798803			PFK2	97.7316	52.9337	0.542092	-0.883391
orf19.134	9.4563	16.4325	1.73001	0.790781			HGT6	37.1081	19.9893	0.539917	-0.889189
orf19.5879	11.0489	19.1629	1.72778	0.788924			orf19.4907	32.2821	17.1221	0.53184	-0.910935
orf19.3577.1	6.9281	12.0274	1.72556	0.787064			orf19.1189	23.6396	12.4991	0.530721	-0.913975
SER1	15.3852	26.6026	1.72439	0.78609			ENO1	577.21	305.948	0.530128	-0.915588
orf19.4061	9.5862	16.5834	1.72239	0.784411			VTC4	39.8603	21.0764	0.529936	-0.91611
GCV3	29.1773	50.2932	1.72124	0.783447			ATO2	31.6602	16.6396	0.527062	-0.923955
TRM2	17.143	29.5046	1.71691	0.779811			PHO84	358.162	186.71	0.521435	-0.939441
QCR9	21.8961	37.5806	1.71306	0.776574			CAR1	49.2121	25.5284	0.519718	-0.944198
orf19.2406	63.2953	108.476	1.71268	0.776255			FRP3	39.0471	20.2265	0.519234	-0.945544
orf19.3196	8.7807	15.0876	1.71018	0.774149			WSC4	33.0676	17.1211	0.519215	-0.945597
AKR1	21.6788	37.123	1.70914	0.77327			OSM2	25.98	13.4181	0.518332	-0.948051
orf19.913.2	38.2005	65.2173	1.70539	0.770102			ZRT2	22.6645	11.6934	0.518061	-0.948806
orf19.6220	13.0519	22.3253	1.7051	0.769856			PIL1	97.6737	50.4197	0.5167	-0.9526
FAD3	13.5154	23.1075	1.7045	0.769352			orf19.6852.1	117.406	60.581	0.51641	-0.953412
orf19.6903	9.2838	15.8685	1.70171	0.766985			QDR1	33.9017	17.3545	0.513342	-0.962008
orf19.4167	6.5014	11.1239	1.70023	0.76573			orf19.1152	44.1722	22.617	0.513121	-0.962629
RIP1	46.8765	79.4666	1.69375	0.760224			HSP70	37.2891	19.049	0.512155	-0.965349
orf19.1950	11.2372	19.0533	1.68942	0.756529			GSY1	30.8178	15.6672	0.509972	-0.971511
ADE2	15.6956	26.5815	1.68917	0.756317			RCT1	148.643	75.3168	0.507028	-0.979863
orf19.3481	41.48	69.913	1.68381	0.751733			orf19.4390	24.1974	12.1622	0.504671	-0.986584
orf19.2782	10.028	16.9463	1.68309	0.751109			DSE1	24.326	12.1497	0.501502	-0.995671
MAK16	14.6428	24.699	1.68211	0.750271			FBA1	537.797	268.218	0.498827	-1.00339
orf19.3578	6.6507	11.253	1.68175	0.749965			TDH3	1055.54	524.639	0.49708	-1.00845
RHD2	13.3344	22.4572	1.67906	0.747656			PGK1	271.716	133.103	0.490048	-1.029
NIP7	11.2978	19.029	1.67831	0.747006			orf19.5455	64.5355	31.4511	0.488139	-1.03464
orf19.5114.1	73.9902	124.213	1.67786	0.746623			orf19.1150.1	39.6928	19.3033	0.487608	-1.03621
RPF1	9.4505	15.8844	1.67367	0.743016			GPH1	33.3599	16.1183	0.484709	-1.04481
orf19.4922	9.6204	16.1605	1.67282	0.742284			DDR48	26.6921	12.8437	0.483116	-1.04956
SSA2	75.5436	126.385	1.67212	0.74168			orf19.6079	60.1697	28.8618	0.480537	-1.05728
POP3	12.0068	20.1422	1.67197	0.741549			orf19.5474	109.773	52.5298	0.479007	-1.06188
orf19.4883	20.8299	34.8852	1.67154	0.741179			orf19.675	58.128	27.755	0.478378	-1.06378
orf19.1549	12.4922	20.9468	1.67142	0.741071			orf19.1486	99.8469	47.6375	0.477629	-1.06604
PHR1	7.6083	12.7651	1.66899	0.738978			orf19.7077	132.101	62.919	0.476692	-1.06887
CHT2	113.544	189.567	1.66896	0.738948			GAL4	44.5047	21.1553	0.476526	-1.06937
MGE1	43.2373	72.142	1.66697	0.737229			orf19.5518	29.1301	13.8289	0.476526	-1.06937
orf19.3223.1	16.3918	27.3608	1.66512	0.735625			orf19.787.1	102.221	48.566	0.475622	-1.07211
ADE5,7	13.3489	22.2627	1.66279	0.733606			orf19.787	36.2467	17.1868	0.475609	-1.07215
orf19.7194	8.1534	13.5942	1.65922	0.730505			TPS3	34.5335	16.3063	0.473712	-1.07792
orf19.7296	8.9116	14.8469	1.65863	0.729991			SOD4	57.4163	27.1057	0.473009	-1.08006
orf19.7590	27.7296	46.0127	1.65697	0.728544			orf19.5475	103.056	48.506	0.471188	-1.08563
orf19.828	45.7552	75.5402	1.64954	0.722068			ASH1	48.1813	22.3539	0.465064	-1.1045
orf19.7397.1	10.0933	16.6954	1.64769	0.720445			MSN4	23.4738	10.6904	0.457728	-1.12744
BAT21	13.301	21.9383	1.64453	0.717672			PIR1	106.103	48.2713	0.45546	-1.1346
orf19.4740	20.242	33.3373	1.64376	0.716997			ENG1	45.1249	20.391	0.453091	-1.14213
CYT1	47.0407	77.3553	1.64307	0.716391			orf19.409	67.2395	30.2968	0.451396	-1.14753
MED1	39.3375	64.6661	1.64225	0.715671			orf19.33	262.428	117.148	0.446611	-1.16291
orf19.5064.1	11.2452	18.5279	1.64192	0.715383			CDC19	347.74	152.851	0.439718	-1.18535
orf19.3836	13.7971	22.71	1.64135	0.714883			GPM1	295.298	128.896	0.436686	-1.19533
orf19.1791	9.5796	15.7844	1.64102	0.714591			RTA3	26.2106	10.7251	0.411435	-1.28126
orf19.3061.1	81.2244	133.216	1.63931	0.713089			POL93	47.0872	19.2009	0.409028	-1.28973
EFB1	100.899	165.393	1.63857	0.712434			ADH2	32.5436	13.0902	0.404067	-1.30733
AAT1	17.9558	29.4825	1.63839	0.712282			orf19.3325	25.6909	10.2626	0.401793	-1.31548
orf19.6035	15.0113	24.6542	1.63813	0.712046			orf19.5267	46.8726	18.5996	0.398096	-1.32881
HIS3	12.0277	19.733	1.63535	0.709597			PGA62	894.186	349.881	0.391352	-1.35346
SIK1	20.6802	33.8828	1.63535	0.709595			URA4	30.0846	11.5018	0.384362	-1.37946
HIS7	13.5415	22.189	1.63391	0.70833			ADH1	828.53	317.955	0.383833	-1.38145
orf19.2439.1	25.3345	41.4481	1.63353	0.707996			PDC11	762.201	290.293	0.380943	-1.39235
orf19.2362	8.2142	13.469	1.63203	0.706665			FCR1	49.426	18.4654	0.374862	-1.41557
orf19.225	12.8408	21.01	1.63127	0.706			RBE1	67.9686	24.8025	0.365844	-1.4507
MRT4	8.4721	13.8748	1.63027	0.705107			FGR41	47.1421	16.8792	0.359408	-1.4763
COX5	35.6763	58.1347	1.62775	0.702875			ADAEC	67.253	23.1452	0.345125	-1.53481
orf19.3108	8.6019	14.0593	1.62715	0.702348			YWP1	392.4	134.53	0.343006	-1.54369
orf19.1394	10.4663	17.0872	1.62661	0.701864			CHT3	48.8511	16.2122	0.333235	-1.58539
orf19.5504	7.5411	12.3233	1.62585	0.701196			PGA38	80.0238	26.5841	0.333036	-1.58625
orf19.2018.1	13.8007	22.4562	1.62267	0.698367			GPM2	32.4728	10.3962	0.322238	-1.6338
orf19.2821	22.5719	36.6865	1.62256	0.698271			SCW11	75.4964	24.2495	0.322099	-1.63443
orf19.1985	12.3791	20.1319	1.62126	0.697118			PHO113	61.2054	19.5018	0.31974	-1.64503
orf19.2314	12.6171	20.505	1.62026	0.696225			PHO112	32.8114	10.2945	0.315833	-1.66277
NEP1	12.4832	20.2821	1.61979	0.695804			CSP37	38.567	12.0706	0.314754	-1.6677
orf19.5225	28.7553	46.6367	1.61969	0.69572			AHP1	138.306	34.019	0.246513	-2.02026
BUD21	15.4965	25.1127	1.61656	0.692928			PGA6	84.466	19.2702	0.229054	-2.12624
orf19.1305	8.4477	13.6946	1.61384	0.690495			GIT3	303.45	59.7946	0.197313	-2.34144
ANT1	18.0047	29.0978	1.61272	0.689495			PHO100	183.27	11.7549	0.0646502	-3.9512
orf19.1082	19.781	31.9562	1.6124	0.689213			KIP2	12.3814	8.3222	0.67478	-0.567511
HBR3	10.5176	17.0189	1.61231	0.689132			ATC1	10.3935	6.977	0.674417	-0.568286
BMT7	7.276	11.729	1.60371	0.681418			RAD57	12.553	8.3799	0.670189	-0.57736
YMC1	14.4157	23.1405	1.60106	0.679027			orf19.3226	11.4668	7.6264	0.667981	-0.582122
OGG1	25.126	40.2841	1.60089	0.678876			orf19.6654	12.153	8.0748	0.667167	-0.58388
ARC18	6.5858	10.5971	1.59997	0.678048			orf19.6840	11.5249	7.6415	0.665941	-0.586533
orf19.2010	12.3062	19.7416	1.59933	0.677467			orf19.6713	12.2151	8.0699	0.663405	-0.592038
GUA1	21.3788	34.2026	1.59704	0.675405			IQG1	14.8199	9.7564	0.660621	-0.598105
orf19.5564	9.4415	15.1303	1.59622	0.674656			RIM15	11.2468	7.3935	0.660406	-0.598574
RPA34	9.2868	14.8616	1.5939	0.672559			orf19.2269	13.4325	8.7666	0.655208	-0.609975
YTM1	13.2842	21.2196	1.59289	0.671649			AYR2	11.3152	7.3755	0.654872	-0.610714
MEC3	15.2205	24.2971	1.59245	0.671246			ALS9	12.7094	8.2812	0.654301	-0.611974
orf19.1388	18.9286	30.1642	1.59046	0.669443			orf19.35	13.1463	8.559	0.653692	-0.613317
orf19.1268	11.7561	18.7325	1.58842	0.667595			orf19.5129	13.9751	8.9924	0.645992	-0.630412
MEP1	11.1092	17.6446	1.58304	0.662697			DBF2	11.5184	7.394	0.645011	-0.632604
MIS12	32.2681	51.1317	1.58278	0.662464			orf19.95	11.2225	7.2029	0.64499	-0.632651
FESUR1	37.6827	59.659	1.58165	0.66143			PRP13	14.7008	9.4115	0.642634	-0.63793
orf19.7603	12.3119	19.512	1.5801	0.660013			CUE5	12.6597	8.0592	0.639451	-0.645095
orf19.2310	29.4379	46.56	1.57967	0.659619			KEX2	15.5504	9.8714	0.637134	-0.650332
NOC2	9.9439	15.7439	1.57746	0.657608			orf19.1240	11.2724	7.1304	0.635785	-0.653389
orf19.827	12.5325	19.8166	1.57662	0.656831			orf19.2761	13.2783	8.3525	0.631807	-0.662445
orf19.5287	41.2233	65.0418	1.57639	0.656628			FMP27	13.2525	8.3267	0.631095	-0.66407
orf19.5589	9.554	15.1144	1.57597	0.656239			FGR29	10.1871	6.3302	0.625074	-0.677901
orf19.4513	21.7819	34.3365	1.57374	0.654201			YVC1	12.669	7.8796	0.62492	-0.678257
orf19.2067	18.8963	29.7653	1.57216	0.652752			POT1	13.8091	8.5294	0.620414	-0.688697
BAT22	21.9124	34.4693	1.57045	0.651175			orf19.5842	15.8829	9.7697	0.617516	-0.695451
orf19.4133	16.318	25.6745	1.56989	0.650666			orf19.4423	13.2729	8.0874	0.612238	-0.707835
ILV2	28.7487	45.05	1.56506	0.64622			MSH2	15.6765	9.4448	0.605001	-0.72499
ZWF1	25.6054	40.0838	1.56324	0.644543			ROD1	15.9146	9.5411	0.602019	-0.732118
KTI12	11.0685	17.3564	1.563	0.644321			SOU1	15.7832	9.4294	0.599967	-0.737044
orf19.7398	12.2231	19.155	1.56251	0.643868			TRX2	15.2331	9.096	0.599748	-0.737571
PTC8	12.3037	19.2752	1.56205	0.643441			orf19.7214	11.5663	6.8687	0.597336	-0.743386
RLM1	23.2012	36.2938	1.56189	0.643288			orf19.321	12.6333	7.4542	0.593263	-0.753255
orf19.6828	8.3792	13.1408	1.56156	0.64299			orf19.2426	13.0147	7.59	0.586365	-0.770129
orf19.4960	13.82	21.6325	1.56124	0.642695			orf19.3461	13.8897	8.0107	0.579762	-0.786467
orf19.1250	7.7023	12.0666	1.55936	0.640955			orf19.3508	11.7652	6.7724	0.579206	-0.787851
orf19.1367.1	17.3109	27.0302	1.55823	0.639909			ALS3	17.2181	9.8885	0.576767	-0.793941
ADE8	21.9885	34.3017	1.55745	0.639184			orf19.7166	14.0814	8.05	0.574696	-0.799128
TSR1	16.9454	26.4343	1.55668	0.638476			SIT1	11.677	6.6522	0.573338	-0.802543
NMD3	13.5536	21.114	1.55373	0.635735			orf19.7396	11.5809	6.5936	0.573038	-0.803297
orf19.69.2	10.1845	15.8541	1.55128	0.633456			orf19.1562	12.2339	6.9541	0.571928	-0.806095
REX2	9.3002	14.4664	1.54958	0.631881			orf19.2684	13.3093	7.5151	0.567897	-0.816299
ILV3	27.5523	42.7295	1.54886	0.631205			orf19.3048	15.2974	8.5754	0.563433	-0.827685
MAM33	32.5489	50.3578	1.54547	0.628043			LIP8	15.345	8.5983	0.563179	-0.828334
IDH1	38.7186	59.7878	1.54276	0.625514			CAT2	16.7839	9.3586	0.560214	-0.83595
ATF1	23.3653	36.0893	1.54225	0.625034			orf19.988	14.8165	8.2064	0.55686	-0.844614
orf19.2784	7.5366	11.671	1.54139	0.624235			ARA1	13.1563	7.2179	0.552032	-0.857177
orf19.1682	24.2555	37.4191	1.54048	0.623378			YDC1	13.1629	7.1385	0.545771	-0.873634
orf19.6350	7.2557	11.228	1.54003	0.622959			orf19.398	12.8639	6.9228	0.54172	-0.884382
LYS12	28.8816	44.5324	1.54003	0.622954			FOX2	13.2206	7.0962	0.540231	-0.888352
ALI1	14.8731	22.9548	1.53975	0.622694			ACS1	17.2167	9.2199	0.538203	-0.893778
PAM16	38.0229	58.4921	1.53693	0.620048			orf19.338	15.2697	8.1716	0.538176	-0.893851
PTP3	21.9519	33.7727	1.53604	0.61922			SUL2	16.3784	8.7422	0.536593	-0.898099
ATP18	40.2051	61.6909	1.53308	0.616432			SWE1	14.9993	7.9376	0.532316	-0.909645
HMX1	22.3072	34.242	1.53263	0.616012			GAD1	14.7132	7.7773	0.531776	-0.91111
orf19.287	22.5641	34.6275	1.53227	0.61567			orf19.6008	13.9232	7.2713	0.52565	-0.927825
SDH12	36.2675	55.6165	1.53204	0.615455			orf19.3216	13.3038	6.9277	0.524307	-0.931518
orf19.7618	18.0858	27.7519	1.53152	0.614963			AMN1	13.2582	6.8475	0.520093	-0.94316
orf19.3990	8.0205	12.3192	1.52936	0.612932			GDE1	12.5127	6.4005	0.515393	-0.956255
orf19.4225.1	18.309	28.0345	1.5283	0.611929			orf19.1887	16.9883	8.3231	0.492916	-1.02059
orf19.2478	25.665	39.2527	1.52737	0.61105			MAF1	18.6413	9.1369	0.492863	-1.02074
orf19.732	9.2187	14.112	1.52511	0.608909			orf19.3694	17.472	8.5139	0.490206	-1.02854
orf19.7244	14.0705	21.5064	1.52475	0.608568			EBP1	10.1469	4.8594	0.48399	-1.04695
orf19.1765	7.7166	11.8173	1.52461	0.608444			PEX3	17.2391	8.2713	0.482799	-1.05051
orf19.7215.3	31.8585	48.5924	1.52361	0.607497			orf19.1169	19.6751	9.3808	0.479431	-1.0606
orf19.5006.1	28.4552	43.399	1.52333	0.607229			GDB1	10.4657	4.9213	0.475245	-1.07326
orf19.4946	16.3199	24.8947	1.52222	0.606177			CWH8	10.7258	4.9849	0.469702	-1.09018
orf19.4016	39.8102	60.5829	1.52049	0.604533			orf19.2296	16.7973	7.7085	0.462115	-1.11368
NAR1	6.7449	10.3018	1.51964	0.603732			SYG1	10.1854	4.5406	0.451183	-1.14821
PRR2	11.7521	17.8993	1.51866	0.602798			orf19.4531	13.7218	6.0444	0.444544	-1.1696
HBR1	17.6755	26.8914	1.51846	0.60261			PLB4.5	20.2305	8.8856	0.441976	-1.17796
CPR6	23.1343	35.149	1.51711	0.601326			PHO81	15.6077	6.7078	0.433405	-1.20621
orf19.3559	28.3609	43.0753	1.517	0.601225			orf19.6077	17.1941	7.2446	0.424688	-1.23552
orf19.499	8.3378	12.6997	1.51695	0.601171			OPT7	16.5649	6.8637	0.417866	-1.25889
MXR1	25.1027	38.1289	1.51686	0.601085			orf19.3932	11.5999	4.7469	0.414268	-1.27136
RAD16	9.9949	15.2094	1.51655	0.600791			orf19.6311	12.8256	5.0027	0.394775	-1.3409
HOM2	25.7029	38.9889	1.5149	0.599226			ASR2	21.1776	8.1275	0.386674	-1.37081
orf19.7545	21.745	32.9801	1.51431	0.59866			CSH1	12.6842	4.8433	0.386673	-1.37082
orf19.1625	17.4236	26.4314	1.51404	0.598402			MUM2	25.8857	9.8299	0.382129	-1.38787
CHR1	7.8716	11.9354	1.50978	0.594343			GLK4	16.5912	6.1703	0.375665	-1.41248
orf19.5553	7.1568	10.8518	1.50918	0.593763			ASR3	17.0096	6.2215	0.369471	-1.43647
URA2	18.3881	27.7962	1.50887	0.593472			BMT4	22.2985	8.1477	0.368226	-1.44134
MCI4	18.6248	28.1151	1.50683	0.591517			orf19.1277	25.3776	9.1259	0.362118	-1.46547
orf19.5340	30.2773	45.5389	1.5024	0.58727			XOG1	11.3009	3.9739	0.357331	-1.48467
orf19.1953	10.7174	16.1517	1.50237	0.587237			orf19.3483	12.5706	3.8081	0.308438	-1.69695
ECM15	18.0006	27.0929	1.50232	0.587192			GLK1	29.5662	8.8715	0.302415	-1.7254
orf19.5288.1	26.1333	39.27	1.50076	0.585697			CDR4	26.7686	7.6065	0.286822	-1.80177
orf19.5194.1	14.1608	21.2842	1.49951	0.58449			CCN1	19.5245	5.1906	0.269592	-1.89115
orf19.6886	9.2017	13.8331	1.49791	0.58295			orf19.1368	12.0225	3.0308	0.258264	-1.95308
orf19.2256	12.3013	18.4644	1.49697	0.582047			RBT7	14.3389	3.5354	0.251778	-1.98977
FUM12	21.0554	31.5524	1.49619	0.581289			PCL2	25.2776	5.9589	0.23875	-2.06643
ACO2	24.2448	36.3224	1.49611	0.581212			orf19.733	19.1811	4.4569	0.23634	-2.08106
NOP5	26.1454	39.1251	1.49455	0.579713			orf19.2175	22.9195	5.1937	0.229966	-2.12051
orf19.4375	31.2488	46.7471	1.49438	0.57955			orf19.1691	27.7292	6.2662	0.22876	-2.1281
orf19.7279.1	6.9193	10.388	1.49417	0.579341			PCL1	26.5664	5.7944	0.221042	-2.17761
orf19.6660	11.6067	17.3807	1.49322	0.578429			TRY6	21.4575	4.4776	0.212344	-2.23553
orf19.2091	25.0794	37.4709	1.49213	0.577372			RNR22	24.0267	4.6229	0.195754	-2.35289
orf19.2934	12.5458	18.7681	1.49204	0.577291			orf19.1258	41.5528	7.9667	0.193665	-2.36836
RAD6	13.8031	20.6421	1.4919	0.577155			orf19.4216	44.6474	8.0545	0.182234	-2.45614
PGA44	6.8464	10.2621	1.49172	0.576979			HSP12	46.6207	8.1795	0.177213	-2.49645
NHP2	16.7749	25.0346	1.48947	0.574796			WH11	23.0623	3.9304	0.174007	-2.52278
VPS33	14.2565	21.2794	1.48918	0.574517			orf19.6117	42.6371	6.8391	0.162367	-2.62267
ARO2	32.1819	47.936	1.48802	0.573391			RBT5	44.2742	3.8957	0.0900456	-3.4732
orf19.6156	14.2419	21.237	1.48774	0.573121			PLB1	63.6423	3.5513	0.0572822	-4.12577
orf19.501	11.2159	16.7335	1.4876	0.572984			orf19.4189	48.3454	2.1621	0.0466938	-4.42063
orf19.1873	22.4997	33.5134	1.48734	0.572733			GIT1	127.977	5.3344	0.0424309	-4.55874
orf19.1404	12.033	17.9401	1.48686	0.572271			CAS5	17.6621	0.5394	0.035998	-4.79594
STE50	22.6295	33.6814	1.48624	0.571663
orf19.3463	14.5139	21.6188	1.48617	0.571603
orf19.5837	8.0423	11.9994	1.48599	0.571427
orf19.7485	23.9379	35.6176	1.48589	0.571324
orf19.6355	12.022	17.9047	1.48529	0.570746
LSM6	25.2805	37.588	1.48492	0.570385
orf19.3501	11.7329	17.4677	1.48465	0.570122
orf19.5262	7.7292	11.5199	1.48417	0.569661
PRS1	18.6977	27.7566	1.48192	0.567463
orf19.4365	7.6247	11.3438	1.48146	0.567015
orf19.698	13.2254	19.6402	1.4814	0.566958
URA5	25.515	37.8121	1.48007	0.565669
TRP3	14.7797	21.921	1.47994	0.565535
orf19.7663	16.8743	24.9912	1.47819	0.563829
orf19.3742	7.2495	10.7487	1.47611	0.561804
orf19.3547	9.0294	13.3627	1.47465	0.560376
orf19.6833.2	12.8458	18.9859	1.47429	0.560023
COX6	30.2562	44.5982	1.47246	0.558226
HSP90	61.4624	90.3881	1.46986	0.555679
orf19.7673	36.1405	53.1448	1.46921	0.555038
MGM101	14.0471	20.6749	1.46849	0.554335
orf19.2065	11.7358	17.2746	1.46797	0.553823
UTP5	13.9163	20.4685	1.46747	0.553331
orf19.3087.2	38.5752	56.611	1.46634	0.55222
MMD1	62.3751	91.4725	1.46574	0.551633
TRM1	8.4886	12.4813	1.46488	0.550786
orf19.3124	30.7305	45.0565	1.46467	0.550575
NDH51	33.0073	48.3813	1.46437	0.550279
TIM9	18.4802	27.0958	1.4637	0.549618
HAS1	10.5357	15.4633	1.46331	0.549233
SER33	24.047	35.2086	1.46224	0.548176
RPF2	8.188	12.0113	1.46131	0.547258
SER2	12.4359	18.2139	1.46092	0.546873
RPP2A	95.0904	138.959	1.46085	0.546808
PGA57	7.6262	11.1864	1.4608	0.546754
orf19.446.1	18.6224	27.2389	1.46022	0.54619
orf19.7300	10.048	14.7025	1.45866	0.544645
orf19.6675	11.6695	17.059	1.45792	0.543912
LAB5	22.6518	33.052	1.45712	0.543115
RAD32	40.1452	58.4634	1.45516	0.541183
orf19.6418	9.8136	14.3236	1.45493	0.54095
orf19.7013	17.5848	25.6259	1.45469	0.540712
ARO4	53.1861	77.4037	1.45448	0.540506
CIT1	58.3379	84.8152	1.45308	0.539118
HAM1	16.1186	23.4501	1.45204	0.538084
orf19.1872	24.3663	35.4186	1.45174	0.537779
NOP4	9.7665	14.2219	1.45157	0.537613
YNK1	59.8578	86.8311	1.5	0.535925
ATS1	63.6494	92.3109	1.5	0.535651
orf19.2128	13.49	19.5976	1.5	0.535474
orf19.4450.1	13.9014	20.186	1.5	0.534913
HCA4	7.7159	11.2093	1.5	0.533026
RPL28	153.246	221.771	1.5	0.532927
PRO2	17.0046	24.6256	1.5	0.531621

## Sheet: 2. GO process - UP genes
GO processes of all genes with increased RNA PolII occupancy in the cas5∆/cas5∆ mutant in comparison to the wild type strain under basal condition.
GOID	GO term	Cluster frequency	Background frequency	Corrected P-value	False discovery rate	Gene(s) annotated to the term	Directly Annotated GOID List
44281	small molecule metabolic process	77 out of 329 genes, 23.4%	630 out of 13081 background genes, 4.8%	4.77e-12	0	LEU4:SNZ1:SNO1:ARO4:PHO87:C1_06050C_A:ANT1:MMD1:ADE4:ADE5,7:GCV2:SAM4:ZWF1:COX5:PPT2:GUA1:IDH1:SER33:TRP3:FAD3:C1_13330C_A:GCV3:ATP18:MXR1:ARO3:HOM2:PRS1:SER2:C2_02700C_A:HPT1:ADE8:COX6:BAT21:LYS22:HIS3:CYT1:AAT1:SER1:IMH3:ASN1:ILV2:C3_02850C_A:AIP2:C3_04080W_A:ATF1:RIP1:ADE2:BAT22:C3_06950W_A:PRO2:FUM12:LAB5:QCR9:C4_04720W_A:GDH3:SDH12:C5_02190C_A:YNK1:HAM1:ILV3:GCV1:SHM2:HIS7:MIS12:ADE1:LYS12:U…	6974:9116:6006:6543:19284:6636:44262:9435:9089:30447:48315:35786:9070:6102:6123:9097:46037:40009:6520:8615:6563:6531:6241:43066:9113:45984:15867:8152:6546:97080:6541:9085:6165:8361:6740:6529:6814:9082:1300:6564:44182:2:6177:9249:6561:6544:42823:32543:43101:9217:34551:18065:6228:30643:9267:32263:46132:6875:46083:6799:9636:7031:2000185:42542:6730:36170:70301:9405:44208:9060:61508:30448:6597:6635:19…
42254	ribosome biogenesis	47 out of 329 genes, 14.3%	305 out of 13081 background genes, 2.3%	5.91e-10	0	HBR1:C1_02450C_A:NOP4:REI1:YTM1:C1_11000C_A:NEP1:CHR1:C1_12680W_A:REX2:C2_05160C_A:RPF2:C2_05750W_A:MAK16:C2_09660W_A:BUD21:C3_02040C_A:HBR3:C3_04380C_A:CAM1:C3_06760W_A:HCA4:RPF1:C4_05330C_A:C4_05650W_A:HAS1:NOP5:C6_02230W_A:NIP7:C6_02380W_A:MRT4:NOG2:LSM6:CR_03360W_A:CR_04170W_A:NHP2:NOC2:NMD3:CR_07030C_A:CR_07080W_A:TSR1:CR_08500W_A:SIK1:UTP5:CR_10410C_A:CR_10470C_A:POP3	398:45944:55:70507:27:30447:6913:1902775:42274:463:9409:42254:294:43248:17148:36166:6461:1902626:2:48254:34476:30490:34599:9267:282:1990417:42256:6606:747:42273:36170:956:45943:51276:70475:8298:6449:447:462:71216:480:31120:467:10468:31118:30437:54:469:36180:34475:42255:6414:466:7117:32956:8033:278:6364:16070:34965:461:6469:472:35690
43436	oxoacid metabolic process	52 out of 329 genes, 15.8%	366 out of 13081 background genes, 2.8%	8.28e-10	0	LEU4:ARO4:PHO87:ANT1:MMD1:GCV2:SAM4:PPT2:IDH1:SER33:TRP3:FAD3:C1_13330C_A:GCV3:MXR1:ARO3:HOM2:PRS1:SER2:C2_02700C_A:BAT21:LYS22:HIS3:AAT1:SER1:ASN1:ILV2:AIP2:BAT22:C3_06950W_A:PRO2:FUM12:LAB5:C4_04720W_A:GDH3:SDH12:C5_02190C_A:ILV3:GCV1:SHM2:HIS7:MIS12:ADE1:LYS12:CIT1:SDH2:ACO2:ADE13:MIS11:URA2:ARO2:ACO1	9116:6543:19284:6636:44262:9435:9089:9070:6102:9097:6520:6563:6531:9113:45984:15867:8152:6546:97080:6541:9085:8361:6529:6814:9082:1300:6564:2:9249:6561:6544:32543:43101:18065:30643:6799:7031:2000185:6730:70301:44208:6597:1990355:6635:162:9073:6015:6099:44416:9257:46356:19878:6207:46656:55114:6537:1903457:9107:9088:19464:31505:19856:9396:9058:46084:22900:50667:6817:6103:9099:9086:1302:70409:9081:9…
6082	organic acid metabolic process	52 out of 329 genes, 15.8%	367 out of 13081 background genes, 2.8%	9.24e-10	0	LEU4:ARO4:PHO87:ANT1:MMD1:GCV2:SAM4:PPT2:IDH1:SER33:TRP3:FAD3:C1_13330C_A:GCV3:MXR1:ARO3:HOM2:PRS1:SER2:C2_02700C_A:BAT21:LYS22:HIS3:AAT1:SER1:ASN1:ILV2:AIP2:BAT22:C3_06950W_A:PRO2:FUM12:LAB5:C4_04720W_A:GDH3:SDH12:C5_02190C_A:ILV3:GCV1:SHM2:HIS7:MIS12:ADE1:LYS12:CIT1:SDH2:ACO2:ADE13:MIS11:URA2:ARO2:ACO1	9116:6543:19284:6636:44262:9435:9089:9070:6102:9097:6520:6563:6531:9113:45984:15867:8152:6546:97080:6541:9085:8361:6529:6814:9082:1300:6564:2:9249:6561:6544:32543:43101:18065:30643:6799:7031:2000185:6730:70301:44208:6597:1990355:6635:162:9073:6015:6099:44416:9257:46356:19878:6207:46656:55114:6537:1903457:9107:9088:19464:31505:19856:9396:9058:46084:22900:50667:6817:6103:9099:9086:1302:70409:9081:9…
19752	carboxylic acid metabolic process	50 out of 329 genes, 15.2%	355 out of 13081 background genes, 2.7%	3.37e-09	0	LEU4:ARO4:ANT1:MMD1:GCV2:SAM4:PPT2:IDH1:SER33:TRP3:FAD3:C1_13330C_A:GCV3:MXR1:ARO3:HOM2:PRS1:SER2:C2_02700C_A:BAT21:LYS22:HIS3:AAT1:SER1:ASN1:ILV2:AIP2:BAT22:PRO2:FUM12:LAB5:C4_04720W_A:GDH3:SDH12:C5_02190C_A:ILV3:GCV1:SHM2:HIS7:MIS12:ADE1:LYS12:CIT1:SDH2:ACO2:ADE13:MIS11:URA2:ARO2:ACO1	9116:6543:19284:6636:44262:9435:9089:9070:6102:9097:6520:6563:6531:9113:45984:15867:8152:6546:6541:9085:8361:6529:9082:1300:6564:2:9249:6561:6544:32543:43101:18065:7031:6730:70301:44208:6597:1990355:6635:162:9073:6015:6099:44416:9257:46356:19878:6207:46656:55114:6537:1903457:9107:9088:19464:31505:19856:9396:9058:46084:22900:50667:6103:9099:9086:1302:70409:9081:9083:105:6189:6106:9098:71585:9059:3…
46040	IMP metabolic process	9 out of 329 genes, 2.7%	10 out of 13081 background genes, 0.1%	1.12e-08	0	ADE4:ADE5,7:HPT1:ADE8:ADE2:ADE1:ADE17:ADE6:ADE13	9116:30447:9113:44182:32263:6875:46083:9405:44208:6164:46084:32264:6106:6189
6188	IMP biosynthetic process	9 out of 329 genes, 2.7%	10 out of 13081 background genes, 0.1%	1.12e-08	0	ADE4:ADE5,7:HPT1:ADE8:ADE2:ADE1:ADE17:ADE6:ADE13	9116:30447:9113:44182:32263:6875:46083:9405:44208:6164:46084:32264:6106:6189
6189	'de novo' IMP biosynthetic process	8 out of 329 genes, 2.4%	8 out of 13081 background genes, 0.1%	2.47e-08	0	ADE4:ADE5,7:ADE8:ADE2:ADE1:ADE17:ADE6:ADE13	9116:30447:9113:44182:6875:46083:9405:44208:6164:46084:6106:6189
16053	organic acid biosynthetic process	31 out of 329 genes, 9.4%	168 out of 13081 background genes, 1.3%	6.46e-08	0	LEU4:ARO4:MMD1:SAM4:PPT2:SER33:TRP3:FAD3:C1_13330C_A:MXR1:ARO3:HOM2:PRS1:SER2:C2_02700C_A:BAT21:LYS22:HIS3:SER1:ASN1:ILV2:PRO2:LAB5:C4_04720W_A:GDH3:ILV3:HIS7:MIS12:LYS12:MIS11:ARO2	9116:19284:6636:9435:9089:9070:9097:6531:9113:6546:9085:8361:6529:9082:6564:2:9249:6561:32543:43101:18065:6730:70301:6597:1990355:162:9073:6015:9257:19878:6207:46656:55114:6537:9107:9088:31505:19856:9396:50667:9099:9086:9083:105:9098:71585:9059:35690:9090:6633:15940
46394	carboxylic acid biosynthetic process	31 out of 329 genes, 9.4%	168 out of 13081 background genes, 1.3%	6.46e-08	0	LEU4:ARO4:MMD1:SAM4:PPT2:SER33:TRP3:FAD3:C1_13330C_A:MXR1:ARO3:HOM2:PRS1:SER2:C2_02700C_A:BAT21:LYS22:HIS3:SER1:ASN1:ILV2:PRO2:LAB5:C4_04720W_A:GDH3:ILV3:HIS7:MIS12:LYS12:MIS11:ARO2	9116:19284:6636:9435:9089:9070:9097:6531:9113:6546:9085:8361:6529:9082:6564:2:9249:6561:32543:43101:18065:6730:70301:6597:1990355:162:9073:6015:9257:19878:6207:46656:55114:6537:9107:9088:31505:19856:9396:50667:9099:9086:9083:105:9098:71585:9059:35690:9090:6633:15940
72521	purine-containing compound metabolic process	25 out of 329 genes, 7.6%	118 out of 13081 background genes, 0.9%	2.27e-07	0	C1_06050C_A:ADE4:ADE5,7:SAM4:COX5:GUA1:ATP18:PRS1:HPT1:ADE8:COX6:CYT1:SER1:IMH3:C3_04080W_A:RIP1:ADE2:QCR9:C4_04720W_A:YNK1:ADE1:ADE17:ADE6:ADE13:MIS11	6974:9116:19284:9435:30447:48315:35786:6123:46037:40009:6241:9113:6546:6165:8361:6564:44182:6177:43101:34551:6228:9267:32263:6875:46083:6730:36170:9405:44208:61508:9060:30448:162:6015:9257:44416:15986:6207:46656:71216:55114:46777:6979:31505:19856:51211:6122:36180:9396:6164:46084:50667:6183:32264:105:6106:6189:33615:35690
34470	ncRNA processing	43 out of 329 genes, 13.1%	311 out of 13081 background genes, 2.4%	2.36e-07	0	HBR1:TRM2:NOP4:C1_11000C_A:NEP1:CHR1:REX2:RPF2:C2_05750W_A:MAK16:C2_09500W_A:BUD21:C3_02040C_A:HBR3:C3_04380C_A:TRM12:C3_06760W_A:C4_00880W_A:SEN2:HCA4:RPF1:C4_03730C_A:C4_05330C_A:C4_05650W_A:HAS1:NOP5:NIP7:MRT4:LSM6:TRM1:CR_03360W_A:KTI12:CR_04170W_A:NHP2:CR_07030C_A:CR_07080W_A:ATS1:TSR1:SIK1:UTP5:CR_10410C_A:CR_10470C_A:POP3	398:55:30447:70507:27:42274:463:42254:70901:294:226:43248:36166:6461:1902626:2:48254:34476:30490:34599:30488:6302:1990417:42256:42273:956:45943:70475:8298:2939:447:379:462:1680:55114:480:31120:467:6400:10468:31118:54:469:34475:16049:42255:466:7117:32956:8033:2098:6364:2940:34965:461:6379:6469:31591:6357:472:35690
22613	ribonucleoprotein complex biogenesis	48 out of 329 genes, 14.6%	375 out of 13081 background genes, 2.9%	2.97e-07	0	HBR1:C1_02450C_A:NOP4:REI1:YTM1:C1_11000C_A:NEP1:CHR1:C1_12680W_A:REX2:C2_05160C_A:RPF2:C2_05750W_A:MAK16:C2_09660W_A:BUD21:C3_02040C_A:HBR3:C3_04380C_A:CAM1:C3_06760W_A:HCA4:RPF1:C4_05330C_A:C4_05650W_A:HAS1:NOP5:C6_02230W_A:NIP7:C6_02380W_A:MRT4:NOG2:HSP90:LSM6:CR_03360W_A:CR_04170W_A:NHP2:NOC2:NMD3:CR_07030C_A:CR_07080W_A:TSR1:CR_08500W_A:SIK1:UTP5:CR_10410C_A:CR_10470C_A:POP3	398:45944:55:70507:27:30447:6913:1902775:42274:463:9409:42254:492:294:34605:42981:43248:17148:36166:6461:44182:1902626:2:48254:34476:30490:34599:9267:282:1990417:42256:6606:747:42273:36170:956:9405:30518:45943:51276:70475:723:8298:6449:447:462:71216:480:31120:467:10468:31118:30437:54:6457:469:36180:34475:42255:6414:1900429:466:7117:32956:8033:278:6364:16070:34965:461:6469:472:35690
72522	purine-containing compound biosynthetic process	17 out of 329 genes, 5.2%	55 out of 13081 background genes, 0.4%	3.5e-07	0	ADE4:ADE5,7:GUA1:ATP18:PRS1:HPT1:ADE8:SER1:IMH3:ADE2:C4_04720W_A:YNK1:ADE1:ADE17:ADE6:ADE13:MIS11	6974:9116:9435:30447:35786:46037:6241:9113:6546:6165:8361:6564:44182:6177:43101:6228:9267:32263:6875:46083:6730:36170:9405:44208:61508:30448:162:6015:9257:44416:15986:6207:46656:71216:55114:46777:6979:31505:19856:51211:36180:9396:6164:46084:6183:32264:105:6106:6189:33615:35690
6364	rRNA processing	34 out of 329 genes, 10.3%	213 out of 13081 background genes, 1.6%	4.51e-07	0	HBR1:NOP4:C1_11000C_A:NEP1:CHR1:REX2:RPF2:C2_05750W_A:MAK16:BUD21:C3_02040C_A:HBR3:C3_04380C_A:C3_06760W_A:HCA4:RPF1:C4_05330C_A:C4_05650W_A:HAS1:NOP5:NIP7:MRT4:LSM6:CR_03360W_A:CR_04170W_A:NHP2:CR_07030C_A:CR_07080W_A:TSR1:SIK1:UTP5:CR_10410C_A:CR_10470C_A:POP3	398:55:30447:70507:27:42274:463:42254:294:43248:36166:6461:1902626:2:48254:34476:30490:34599:1990417:42256:42273:956:45943:70475:8298:447:462:480:31120:467:10468:31118:54:469:34475:42255:466:32956:8033:6364:34965:461:6469:472:35690
8652	cellular amino acid biosynthetic process	23 out of 329 genes, 7.0%	104 out of 13081 background genes, 0.8%	4.91e-07	0	LEU4:ARO4:MMD1:SAM4:SER33:TRP3:MXR1:ARO3:HOM2:PRS1:SER2:BAT21:LYS22:HIS3:SER1:ASN1:ILV2:PRO2:GDH3:ILV3:HIS7:LYS12:ARO2	9116:19284:9435:9089:9070:9097:6531:9113:9085:8361:6529:9082:6564:2:6561:32543:43101:70301:1990355:162:9073:6015:19878:6207:55114:6537:9088:31505:19856:50667:9099:9086:9083:105:9098:71585:35690:9090
1901605	alpha-amino acid metabolic process	25 out of 329 genes, 7.6%	128 out of 13081 background genes, 1.0%	1.39e-06	0	LEU4:MMD1:GCV2:SAM4:SER33:TRP3:GCV3:MXR1:HOM2:PRS1:SER2:BAT21:LYS22:HIS3:SER1:ASN1:ILV2:PRO2:GDH3:GCV1:SHM2:HIS7:LYS12:MIS11:URA2	9116:6543:19284:9435:9089:9070:9097:6563:6531:9113:45984:6546:6541:9085:8361:6529:6564:2:9249:6561:6544:32543:43101:6730:70301:1990355:162:6015:9257:19878:6207:46656:55114:6537:9088:19464:31505:19856:50667:9099:9086:70409:9083:105:9098:71585:35690:9090
46112	nucleobase biosynthetic process	11 out of 329 genes, 3.3%	23 out of 13081 background genes, 0.2%	2.11e-06	0	ADE4:ADE5,7:PRS1:ADE8:SER1:ADE2:C4_04720W_A:ADE1:URA5:MIS11:URA2	9116:6543:9435:30447:9113:45984:6546:6541:8361:6564:44182:43101:46132:6875:46083:6730:9405:162:6015:9257:6207:46656:55114:31505:19856:9396:6164:46084:70409:105:6106:6189:35690
6520	cellular amino acid metabolic process	31 out of 329 genes, 9.4%	195 out of 13081 background genes, 1.5%	3.03e-06	0	LEU4:ARO4:MMD1:GCV2:SAM4:SER33:TRP3:GCV3:MXR1:ARO3:HOM2:PRS1:SER2:BAT21:LYS22:HIS3:AAT1:SER1:ASN1:ILV2:BAT22:PRO2:GDH3:ILV3:GCV1:SHM2:HIS7:LYS12:MIS11:URA2:ARO2	9116:6543:19284:9435:9089:9070:9097:6520:6563:6531:9113:45984:8152:6546:6541:9085:8361:6529:9082:1300:6564:2:9249:6561:6544:32543:43101:6730:70301:1990355:162:9073:6015:9257:19878:6207:46656:55114:6537:9088:19464:31505:19856:9058:50667:9099:9086:1302:70409:9081:9083:105:9098:71585:35690:9090
42273	ribosomal large subunit biogenesis	20 out of 329 genes, 6.1%	93 out of 13081 background genes, 0.7%	1.12e-05	0	NOP4:REI1:YTM1:C2_05160C_A:RPF2:C2_05750W_A:MAK16:C2_09660W_A:C3_02040C_A:RPF1:C4_05330C_A:HAS1:C6_02230W_A:NIP7:C6_02380W_A:MRT4:CR_04170W_A:NOC2:CR_07080W_A:CR_08500W_A	55:70507:27:30447:6913:1902775:42274:463:9409:17148:1902626:9267:1990417:42256:6606:747:42273:36170:956:51276:70475:8298:447:462:71216:480:30437:54:36180:42255:466:7117:32956:278:6364:16070:6469:472:35690
16072	rRNA metabolic process	35 out of 329 genes, 10.6%	253 out of 13081 background genes, 1.9%	1.23e-05	0	HBR1:NOP4:RPA34:C1_11000C_A:NEP1:CHR1:REX2:RPF2:C2_05750W_A:MAK16:BUD21:C3_02040C_A:HBR3:C3_04380C_A:C3_06760W_A:HCA4:RPF1:C4_05330C_A:C4_05650W_A:HAS1:NOP5:NIP7:MRT4:LSM6:CR_03360W_A:CR_04170W_A:NHP2:CR_07030C_A:CR_07080W_A:TSR1:SIK1:UTP5:CR_10410C_A:CR_10470C_A:POP3	398:55:30447:70507:27:42274:463:42254:294:43248:36166:6461:1902626:2:48254:34476:30490:34599:1990417:42256:42273:956:45943:70475:8298:447:462:480:31120:467:10468:31118:54:469:34475:42255:466:32956:8033:6364:34965:461:6469:472:42790:35690:6362
45333	cellular respiration	19 out of 329 genes, 5.8%	86 out of 13081 background genes, 0.7%	1.63e-05	0	C1_06050C_A:COX5:IDH1:COX6:NDH51:CYT1:C3_04080W_A:RIP1:FUM12:QCR9:SDH12:C5_02190C_A:C5_05230C_A:MAM33:MCI4:CIT1:SDH2:ACO2:ACO1	12501:44262:30447:48315:6102:6123:40009:2:32543:34551:70131:9267:44011:22904:36170:9060:6099:44416:46356:55114:42149:30437:32981:6122:22900:6103:6106
9060	aerobic respiration	16 out of 329 genes, 4.9%	61 out of 13081 background genes, 0.5%	1.63e-05	0	C1_06050C_A:COX5:IDH1:NDH51:C3_04080W_A:RIP1:FUM12:QCR9:SDH12:C5_02190C_A:C5_05230C_A:MAM33:CIT1:SDH2:ACO2:ACO1	12501:44262:30447:48315:6102:6123:40009:2:32543:34551:70131:9267:44011:36170:9060:6099:44416:46356:55114:42149:30437:6122:22900:6103:6106
55086	nucleobase-containing small molecule metabolic process	29 out of 329 genes, 8.8%	187 out of 13081 background genes, 1.4%	1.77e-05	0	C1_06050C_A:ADE4:ADE5,7:SAM4:ZWF1:COX5:GUA1:ATP18:PRS1:HPT1:ADE8:COX6:CYT1:SER1:IMH3:C3_04080W_A:RIP1:ADE2:QCR9:C4_04720W_A:YNK1:HAM1:ADE1:URA5:ADE17:ADE6:ADE13:MIS11:URA2	6974:9116:6006:6543:19284:9435:30447:48315:35786:6123:46037:40009:6241:9113:45984:6546:6541:6165:8361:6740:6564:44182:6177:43101:9217:34551:6228:9267:32263:46132:6875:46083:42542:6730:36170:9405:44208:61508:9060:30448:162:6015:9257:44416:15986:6207:46656:71216:55114:46777:6979:31505:19856:51211:9051:6122:36180:9396:9213:6164:46084:50667:6183:70409:32264:105:6106:6189:33615:35690
9150	purine ribonucleotide metabolic process	20 out of 329 genes, 6.1%	97 out of 13081 background genes, 0.7%	2.4e-05	0	C1_06050C_A:ADE4:ADE5,7:COX5:GUA1:ATP18:HPT1:ADE8:COX6:CYT1:IMH3:C3_04080W_A:RIP1:ADE2:QCR9:YNK1:ADE1:ADE17:ADE6:ADE13	6974:9116:30447:48315:35786:6123:46037:40009:6241:9113:6165:44182:6177:34551:6228:9267:32263:6875:46083:36170:9405:44208:61508:9060:30448:44416:15986:71216:55114:46777:6979:51211:6122:36180:6164:46084:6183:32264:6106:6189:33615:35690
9126	purine nucleoside monophosphate metabolic process	19 out of 329 genes, 5.8%	88 out of 13081 background genes, 0.7%	2.44e-05	0	C1_06050C_A:ADE4:ADE5,7:COX5:GUA1:ATP18:HPT1:ADE8:COX6:CYT1:IMH3:C3_04080W_A:RIP1:ADE2:QCR9:ADE1:ADE17:ADE6:ADE13	9116:30447:48315:35786:6123:46037:40009:9113:44182:6177:34551:9267:32263:6875:46083:36170:9405:44208:9060:44416:15986:71216:55114:6122:36180:6164:46084:32264:6106:6189:33615:35690
9167	purine ribonucleoside monophosphate metabolic process	19 out of 329 genes, 5.8%	88 out of 13081 background genes, 0.7%	2.44e-05	0	C1_06050C_A:ADE4:ADE5,7:COX5:GUA1:ATP18:HPT1:ADE8:COX6:CYT1:IMH3:C3_04080W_A:RIP1:ADE2:QCR9:ADE1:ADE17:ADE6:ADE13	9116:30447:48315:35786:6123:46037:40009:9113:44182:6177:34551:9267:32263:6875:46083:36170:9405:44208:9060:44416:15986:71216:55114:6122:36180:6164:46084:32264:6106:6189:33615:35690
6163	purine nucleotide metabolic process	20 out of 329 genes, 6.1%	98 out of 13081 background genes, 0.7%	2.89e-05	0	C1_06050C_A:ADE4:ADE5,7:COX5:GUA1:ATP18:HPT1:ADE8:COX6:CYT1:IMH3:C3_04080W_A:RIP1:ADE2:QCR9:YNK1:ADE1:ADE17:ADE6:ADE13	6974:9116:30447:48315:35786:6123:46037:40009:6241:9113:6165:44182:6177:34551:6228:9267:32263:6875:46083:36170:9405:44208:61508:9060:30448:44416:15986:71216:55114:46777:6979:51211:6122:36180:6164:46084:6183:32264:6106:6189:33615:35690
19693	ribose phosphate metabolic process	22 out of 329 genes, 6.7%	118 out of 13081 background genes, 0.9%	3.35e-05	0	C1_06050C_A:ADE4:ADE5,7:ZWF1:COX5:GUA1:ATP18:PRS1:HPT1:ADE8:COX6:CYT1:IMH3:C3_04080W_A:RIP1:ADE2:QCR9:YNK1:ADE1:ADE17:ADE6:ADE13	6974:9116:6006:9435:30447:48315:35786:6123:46037:40009:6241:9113:6165:8361:6740:44182:6177:43101:34551:6228:9267:32263:6875:46083:42542:36170:9405:44208:61508:9060:30448:162:6015:44416:15986:6207:71216:55114:46777:6979:31505:19856:51211:9051:6122:36180:6164:46084:6183:32264:105:6106:6189:33615:35690
1901607	alpha-amino acid biosynthetic process	19 out of 329 genes, 5.8%	91 out of 13081 background genes, 0.7%	4.35e-05	0	LEU4:MMD1:SAM4:SER33:TRP3:MXR1:HOM2:PRS1:SER2:BAT21:LYS22:HIS3:SER1:ASN1:ILV2:PRO2:GDH3:HIS7:LYS12	9116:19284:9435:9089:9070:9097:6531:9113:9085:8361:6529:6564:2:6561:32543:43101:70301:1990355:162:6015:19878:6207:55114:6537:9088:31505:19856:50667:9099:9086:9083:105:9098:71585:35690:9090
9161	ribonucleoside monophosphate metabolic process	19 out of 329 genes, 5.8%	91 out of 13081 background genes, 0.7%	4.35e-05	0	C1_06050C_A:ADE4:ADE5,7:COX5:GUA1:ATP18:HPT1:ADE8:COX6:CYT1:IMH3:C3_04080W_A:RIP1:ADE2:QCR9:ADE1:ADE17:ADE6:ADE13	9116:30447:48315:35786:6123:46037:40009:9113:44182:6177:34551:9267:32263:6875:46083:36170:9405:44208:9060:44416:15986:71216:55114:6122:36180:6164:46084:32264:6106:6189:33615:35690
9113	purine nucleobase biosynthetic process	8 out of 329 genes, 2.4%	14 out of 13081 background genes, 0.1%	5.73e-05	0	ADE4:ADE5,7:ADE8:SER1:ADE2:C4_04720W_A:ADE1:MIS11	9116:30447:9113:6546:6564:44182:6875:46083:6730:9405:9257:46656:55114:9396:6164:46084:6106:6189
34660	ncRNA metabolic process	46 out of 329 genes, 14.0%	413 out of 13081 background genes, 3.2%	6.19e-05	0	HBR1:TRM2:NOP4:RPA34:C1_11000C_A:NEP1:CHR1:REX2:RPF2:C2_05750W_A:MAK16:C2_09500W_A:BUD21:C3_02040C_A:HBR3:C3_04380C_A:TRM12:C3_06760W_A:C4_00880W_A:SEN2:HCA4:RPF1:C4_03730C_A:C4_05330C_A:C4_05650W_A:HAS1:C5_04990W_A:NOP5:NIP7:MRT4:C7_01210C_A:LSM6:TRM1:CR_03360W_A:KTI12:CR_04170W_A:NHP2:CR_07030C_A:CR_07080W_A:ATS1:TSR1:SIK1:UTP5:CR_10410C_A:CR_10470C_A:POP3	398:55:30447:70507:27:42274:463:42797:42254:70901:294:226:43248:36166:6461:1902626:2:48254:34476:30490:34599:30488:6302:1990417:42256:42273:956:45943:70475:8298:2939:447:379:462:1680:55114:480:31120:467:6400:10468:31118:54:469:34475:16049:42255:466:7117:32956:8033:2098:6364:2940:34965:461:6384:6379:6469:31591:6357:472:42790:35690:6362
9123	nucleoside monophosphate metabolic process	19 out of 329 genes, 5.8%	93 out of 13081 background genes, 0.7%	6.3e-05	0	C1_06050C_A:ADE4:ADE5,7:COX5:GUA1:ATP18:HPT1:ADE8:COX6:CYT1:IMH3:C3_04080W_A:RIP1:ADE2:QCR9:ADE1:ADE17:ADE6:ADE13	9116:30447:48315:35786:6123:46037:40009:9113:44182:6177:34551:9267:32263:6875:46083:36170:9405:44208:9060:44416:15986:71216:55114:6122:36180:6164:46084:32264:6106:6189:33615:35690
9259	ribonucleotide metabolic process	20 out of 329 genes, 6.1%	103 out of 13081 background genes, 0.8%	6.97e-05	0	C1_06050C_A:ADE4:ADE5,7:COX5:GUA1:ATP18:HPT1:ADE8:COX6:CYT1:IMH3:C3_04080W_A:RIP1:ADE2:QCR9:YNK1:ADE1:ADE17:ADE6:ADE13	6974:9116:30447:48315:35786:6123:46037:40009:6241:9113:6165:44182:6177:34551:6228:9267:32263:6875:46083:36170:9405:44208:61508:9060:30448:44416:15986:71216:55114:46777:6979:51211:6122:36180:6164:46084:6183:32264:6106:6189:33615:35690
9127	purine nucleoside monophosphate biosynthetic process	12 out of 329 genes, 3.6%	37 out of 13081 background genes, 0.3%	7.66e-05	0	ADE4:ADE5,7:GUA1:ATP18:HPT1:ADE8:IMH3:ADE2:ADE1:ADE17:ADE6:ADE13	9116:30447:35786:46037:9113:44182:6177:9267:32263:6875:46083:36170:9405:44208:44416:15986:71216:55114:36180:6164:46084:32264:6106:6189:33615:35690
9168	purine ribonucleoside monophosphate biosynthetic process	12 out of 329 genes, 3.6%	37 out of 13081 background genes, 0.3%	7.66e-05	0	ADE4:ADE5,7:GUA1:ATP18:HPT1:ADE8:IMH3:ADE2:ADE1:ADE17:ADE6:ADE13	9116:30447:35786:46037:9113:44182:6177:9267:32263:6875:46083:36170:9405:44208:44416:15986:71216:55114:36180:6164:46084:32264:6106:6189:33615:35690
6164	purine nucleotide biosynthetic process	13 out of 329 genes, 4.0%	44 out of 13081 background genes, 0.3%	7.71e-05	0	ADE4:ADE5,7:GUA1:ATP18:HPT1:ADE8:IMH3:ADE2:YNK1:ADE1:ADE17:ADE6:ADE13	6974:9116:30447:35786:46037:6241:9113:6165:44182:6177:6228:9267:32263:6875:46083:36170:9405:44208:61508:30448:44416:15986:71216:55114:46777:6979:51211:36180:6164:46084:6183:32264:6106:6189:33615:35690
9152	purine ribonucleotide biosynthetic process	13 out of 329 genes, 4.0%	44 out of 13081 background genes, 0.3%	7.71e-05	0	ADE4:ADE5,7:GUA1:ATP18:HPT1:ADE8:IMH3:ADE2:YNK1:ADE1:ADE17:ADE6:ADE13	6974:9116:30447:35786:46037:6241:9113:6165:44182:6177:6228:9267:32263:6875:46083:36170:9405:44208:61508:30448:44416:15986:71216:55114:46777:6979:51211:36180:6164:46084:6183:32264:6106:6189:33615:35690
9112	nucleobase metabolic process	11 out of 329 genes, 3.3%	31 out of 13081 background genes, 0.2%	9.28e-05	0	ADE4:ADE5,7:PRS1:ADE8:SER1:ADE2:C4_04720W_A:ADE1:URA5:MIS11:URA2	9116:6543:9435:30447:9113:45984:6546:6541:8361:6564:44182:43101:46132:6875:46083:6730:9405:162:6015:9257:6207:46656:55114:31505:19856:9396:6164:46084:70409:105:6106:6189:35690
46390	ribose phosphate biosynthetic process	14 out of 329 genes, 4.3%	53 out of 13081 background genes, 0.4%	0.00011	0	ADE4:ADE5,7:GUA1:ATP18:PRS1:HPT1:ADE8:IMH3:ADE2:YNK1:ADE1:ADE17:ADE6:ADE13	6974:9116:9435:30447:35786:46037:6241:9113:6165:8361:44182:6177:43101:6228:9267:32263:6875:46083:36170:9405:44208:61508:30448:162:6015:44416:15986:6207:71216:55114:46777:6979:31505:19856:51211:36180:6164:46084:6183:32264:105:6106:6189:33615:35690
44283	small molecule biosynthetic process	33 out of 329 genes, 10.0%	256 out of 13081 background genes, 2.0%	0.00018	0	LEU4:SNZ1:SNO1:ARO4:MMD1:SAM4:PPT2:SER33:TRP3:FAD3:C1_13330C_A:MXR1:ARO3:HOM2:PRS1:SER2:C2_02700C_A:BAT21:LYS22:HIS3:SER1:ASN1:ILV2:PRO2:LAB5:C4_04720W_A:GDH3:ILV3:HIS7:MIS12:LYS12:MIS11:ARO2	9116:19284:6636:9435:9089:9070:9097:8615:6531:9113:43066:6546:9085:8361:6529:9082:6564:2:9249:6561:32543:42823:43101:18065:6730:70301:6597:1990355:162:9073:6015:9257:19878:6207:46656:55114:6537:9107:9088:31505:19856:9396:50667:9099:9086:9083:105:9098:71585:9059:35690:9090:6633:15940
55114	oxidation-reduction process	44 out of 329 genes, 13.4%	401 out of 13081 background genes, 3.1%	0.00019	0	HMX1:C1_06050C_A:ANT1:GCV2:ZWF1:COX5:IDH1:SER33:FAD3:C2_00400C_A:MXR1:HOM2:COX6:NDH51:CYT1:IMH3:C2_08850C_A:C2_09500W_A:ALI1:C3_02850C_A:AIP2:C3_04080W_A:RIP1:FESUR1:PRO2:FUM12:QCR9:C4_04720W_A:GDH3:SDH12:C5_01960C_A:C5_02190C_A:C5_05230C_A:GPX2:MAM33:MIS12:LYS12:MCI4:CIT1:SDH2:ACO2:MIS11:ACO1:CR_10140W_A	6006:6636:12501:44262:9089:30447:48315:9070:6102:9097:6123:40009:6531:9113:15867:6546:9085:6740:16226:2:6177:42167:6561:32543:6788:34551:70131:9267:44011:9636:7031:22904:42542:6730:36170:70301:6879:9060:1990355:6635:6099:9257:44416:46356:46656:71216:55114:6537:1903457:42149:9088:6979:34209:19464:6066:6400:30437:9051:32981:6122:1901089:36180:9396:22900:6103:9086:34465:6106:71585:35690:9090
9156	ribonucleoside monophosphate biosynthetic process	12 out of 329 genes, 3.6%	40 out of 13081 background genes, 0.3%	0.0002	0	ADE4:ADE5,7:GUA1:ATP18:HPT1:ADE8:IMH3:ADE2:ADE1:ADE17:ADE6:ADE13	9116:30447:35786:46037:9113:44182:6177:9267:32263:6875:46083:36170:9405:44208:44416:15986:71216:55114:36180:6164:46084:32264:6106:6189:33615:35690
15980	energy derivation by oxidation of organic compounds	20 out of 329 genes, 6.1%	110 out of 13081 background genes, 0.8%	0.00021	0	C1_06050C_A:COX5:IDH1:COX6:NDH51:CYT1:C3_02850C_A:C3_04080W_A:RIP1:FUM12:QCR9:SDH12:C5_02190C_A:C5_05230C_A:MAM33:MCI4:CIT1:SDH2:ACO2:ACO1	12501:44262:30447:48315:6102:6123:40009:2:32543:34551:70131:9267:44011:9636:22904:36170:9060:6099:44416:46356:55114:42149:34209:6066:30437:32981:6122:1901089:22900:6103:6106
9260	ribonucleotide biosynthetic process	13 out of 329 genes, 4.0%	48 out of 13081 background genes, 0.4%	0.00024	0	ADE4:ADE5,7:GUA1:ATP18:HPT1:ADE8:IMH3:ADE2:YNK1:ADE1:ADE17:ADE6:ADE13	6974:9116:30447:35786:46037:6241:9113:6165:44182:6177:6228:9267:32263:6875:46083:36170:9405:44208:61508:30448:44416:15986:71216:55114:46777:6979:51211:36180:6164:46084:6183:32264:6106:6189:33615:35690
9124	nucleoside monophosphate biosynthetic process	12 out of 329 genes, 3.6%	42 out of 13081 background genes, 0.3%	0.00036	0	ADE4:ADE5,7:GUA1:ATP18:HPT1:ADE8:IMH3:ADE2:ADE1:ADE17:ADE6:ADE13	9116:30447:35786:46037:9113:44182:6177:9267:32263:6875:46083:36170:9405:44208:44416:15986:71216:55114:36180:6164:46084:32264:6106:6189:33615:35690
6099	tricarboxylic acid cycle	8 out of 329 genes, 2.4%	17 out of 13081 background genes, 0.1%	0.0004	0	IDH1:FUM12:SDH12:C5_02190C_A:CIT1:SDH2:ACO2:ACO1	44262:6102:2:32543:6099:44416:46356:55114:22900:6103:6106
6101	citrate metabolic process	8 out of 329 genes, 2.4%	17 out of 13081 background genes, 0.1%	0.0004	0	IDH1:FUM12:SDH12:C5_02190C_A:CIT1:SDH2:ACO2:ACO1	44262:6102:2:32543:6099:44416:46356:55114:22900:6103:6106
44710	single-organism metabolic process	94 out of 329 genes, 28.6%	1200 out of 13081 background genes, 9.2%	0.00044	0	LEU4:HMX1:SNZ1:SNO1:ARO4:PHO87:C1_06050C_A:ANT1:MMD1:ADE4:ADE5,7:GCV2:SAM4:ZWF1:COX5:PPT2:GUA1:IDH1:WBP1:SER33:TRP3:FAD3:C1_13330C_A:GCV3:C2_00400C_A:ATP18:MXR1:ARO3:HOM2:PRS1:SER2:C2_02700C_A:HPT1:ADE8:COX6:BAT21:LYS22:NDH51:HIS3:CYT1:AAT1:SER1:IMH3:C2_08850C_A:ASN1:C2_09500W_A:ALI1:STE50:ILV2:C3_02850C_A:AIP2:C3_04080W_A:ATF1:RIP1:ADE2:BAT22:TRM12:C3_06950W_A:FESUR1:PRO2:FUM12:LAB5:QCR9:C4_0472…	6974:9116:6006:6543:19284:6636:12501:44262:9435:9089:31939:30447:161:48315:35786:1402:9070:6102:6123:9097:722:46037:40009:70534:6520:8615:6563:6531:6241:9113:43066:34605:45984:15867:8152:6546:97080:6541:9085:6165:8361:6740:7232:31497:6529:6814:724:9082:16226:1300:71894:6564:1990920:44182:2:6177:42167:9249:6561:42276:6544:32543:42823:6788:43101:6366:9217:34551:18065:6228:30643:70131:9267:32263:440…
6807	nitrogen compound metabolic process	132 out of 329 genes, 40.1%	1894 out of 13081 background genes, 14.5%	0.00078	0	LEU4:HBR1:HMX1:TRM2:SNZ1:SNO1:MGM101:RAD16:C1_03620C_A:NOP4:ARO4:C1_06050C_A:MMD1:ADE4:ADE5,7:GCV2:SAM4:C1_08820C_A:ZWF1:COX5:GUA1:RPA34:C1_11000C_A:NEP1:SER33:TRP3:CHR1:C1_13330C_A:GCV3:ATP18:C2_00630C_A:MXR1:REX2:ARO3:HOM2:PRS1:SER2:C2_02700C_A:HPT1:ADE8:COX6:RAD32:C2_03950W_A:BAT21:LYS22:HIS3:CYT1:RPF2:AAT1:C2_05750W_A:SER1:MEC3:MAK16:IMH3:ASN1:C2_09500W_A:C2_10810W_A:BUD21:C3_02040C_A:ILV2:HB…	398:6974:9116:6006:6543:19284:7329:45944:9435:9089:55:31939:70507:27:30447:1902775:42274:6281:463:48315:35786:9409:7004:42797:9070:6123:9097:722:46037:40009:70534:42254:6520:8615:492:6563:6451:6531:70901:6241:294:9113:43066:42787:742:34605:45984:8152:6546:1990145:6541:9085:6165:8361:6740:34087:42981:226:31497:6529:724:9082:43248:1300:36166:6461:71894:6564:1990920:1902626:44182:6290:2:6177:42167:9…
6396	RNA processing	46 out of 329 genes, 14.0%	453 out of 13081 background genes, 3.5%	0.00094	0	HBR1:TRM2:NOP4:C1_11000C_A:NEP1:CHR1:REX2:RPF2:C2_05750W_A:MAK16:C2_09500W_A:C2_10810W_A:BUD21:C3_02040C_A:HBR3:C3_04380C_A:TRM12:C3_06760W_A:C4_00880W_A:SEN2:HCA4:RPF1:C4_03730C_A:C4_05330C_A:C4_05650W_A:HAS1:NOP5:NIP7:MRT4:LSM6:TRM1:CR_03360W_A:KTI12:CR_03660C_A:CR_04170W_A:NHP2:CR_07030C_A:CR_07080W_A:ATS1:TSR1:SIK1:UTP5:CR_10410C_A:CR_10470C_A:POP3:CR_10820W_A	398:55:30447:70507:27:42274:463:42254:70901:294:226:43248:36166:6461:1902626:2:48254:34476:30490:34599:30488:6302:1990417:42256:42273:956:45943:70475:8298:2939:447:379:462:1680:55114:480:31120:467:6400:10468:31118:54:6396:469:34475:16049:42255:466:7117:32956:8033:2098:6364:2940:34965:461:6379:6469:31591:6357:472:35690
6725	cellular aromatic compound metabolic process	100 out of 329 genes, 30.4%	1327 out of 13081 background genes, 10.1%	0.00108	0	HBR1:HMX1:TRM2:SNZ1:SNO1:MGM101:RAD16:NOP4:ARO4:C1_06050C_A:ADE4:ADE5,7:SAM4:ZWF1:COX5:GUA1:RPA34:C1_11000C_A:NEP1:TRP3:CHR1:ATP18:REX2:ARO3:PRS1:C2_02700C_A:HPT1:ADE8:COX6:RAD32:HIS3:CYT1:RPF2:C2_05750W_A:SER1:MEC3:MAK16:IMH3:C2_09500W_A:C2_10810W_A:BUD21:C3_02040C_A:HBR3:C3_04080W_A:C3_04380C_A:RIP1:ADE2:TRM12:C3_06760W_A:C4_00880W_A:SEN2:HCA4:QCR9:RPF1:C4_03730C_A:C4_04720W_A:C4_05330C_A:C4_05…	398:6974:9116:6006:6543:19284:7329:9435:55:31939:70507:27:30447:1902775:42274:6281:463:48315:35786:9409:7004:42797:6123:722:46037:40009:70534:42254:8615:492:70901:6241:294:9113:43066:42787:742:34605:45984:6546:6541:6165:8361:6740:34087:42981:226:31497:724:43248:36166:6461:71894:6564:1990920:1902626:44182:6290:2:6177:42167:42276:48254:42823:34476:6788:6307:30490:43101:9217:6366:34551:18003:6228:34…
1901360	organic cyclic compound metabolic process	104 out of 329 genes, 31.6%	1399 out of 13081 background genes, 10.7%	0.00115	0	HBR1:HMX1:TRM2:SNZ1:SNO1:MGM101:RAD16:NOP4:ARO4:C1_06050C_A:ADE4:ADE5,7:SAM4:ZWF1:COX5:GUA1:RPA34:C1_11000C_A:NEP1:TRP3:CHR1:ATP18:C2_00630C_A:REX2:ARO3:PRS1:C2_02700C_A:HPT1:ADE8:COX6:RAD32:HIS3:CYT1:RPF2:C2_05750W_A:SER1:MEC3:MAK16:IMH3:C2_09500W_A:C2_10810W_A:BUD21:C3_02040C_A:C3_02850C_A:HBR3:C3_04080W_A:C3_04380C_A:RIP1:ADE2:TRM12:C3_06760W_A:PRO2:C4_00880W_A:LAB5:SEN2:HCA4:QCR9:RPF1:C4_0373…	398:6974:9116:6006:6543:19284:7329:9435:55:31939:70507:27:30447:1902775:42274:6281:463:48315:35786:9409:7004:42797:6123:722:46037:40009:70534:42254:8615:492:70901:6241:294:9113:43066:42787:742:34605:45984:6546:6541:6165:8361:6740:34087:42981:226:31497:724:43248:36166:6461:71894:6564:1990920:1902626:44182:6290:2:6177:42167:9249:6561:42276:48254:42823:34476:6788:6307:30490:43101:9217:6366:34551:180…
72350	tricarboxylic acid metabolic process	8 out of 329 genes, 2.4%	19 out of 13081 background genes, 0.1%	0.00116	0	IDH1:FUM12:SDH12:C5_02190C_A:CIT1:SDH2:ACO2:ACO1	44262:6102:2:32543:6099:44416:46356:55114:22900:6103:6106
46483	heterocycle metabolic process	100 out of 329 genes, 30.4%	1340 out of 13081 background genes, 10.2%	0.00172	0	HBR1:HMX1:TRM2:SNZ1:SNO1:MGM101:RAD16:NOP4:C1_06050C_A:ADE4:ADE5,7:SAM4:ZWF1:COX5:GUA1:RPA34:C1_11000C_A:NEP1:TRP3:CHR1:ATP18:C2_00630C_A:REX2:PRS1:C2_02700C_A:HPT1:ADE8:COX6:RAD32:HIS3:CYT1:RPF2:C2_05750W_A:SER1:MEC3:MAK16:IMH3:C2_09500W_A:C2_10810W_A:BUD21:C3_02040C_A:HBR3:C3_04080W_A:C3_04380C_A:RIP1:ADE2:TRM12:C3_06760W_A:PRO2:C4_00880W_A:LAB5:SEN2:HCA4:QCR9:RPF1:C4_03730C_A:C4_04720W_A:C4_05…	398:6974:9116:6006:6543:19284:7329:9435:55:31939:70507:27:30447:1902775:42274:6281:463:48315:35786:9409:7004:42797:6123:722:46037:40009:70534:42254:8615:492:70901:6241:294:9113:43066:42787:742:34605:45984:6546:6541:6165:8361:6740:34087:42981:226:31497:724:43248:36166:6461:71894:6564:1990920:1902626:44182:6290:2:6177:42167:9249:6561:42276:48254:42823:34476:6788:6307:30490:43101:9217:6366:34551:180…
6144	purine nucleobase metabolic process	8 out of 329 genes, 2.4%	20 out of 13081 background genes, 0.2%	0.00185	0	ADE4:ADE5,7:ADE8:SER1:ADE2:C4_04720W_A:ADE1:MIS11	9116:30447:9113:6546:6564:44182:6875:46083:6730:9405:9257:46656:55114:9396:6164:46084:6106:6189
9069	serine family amino acid metabolic process	10 out of 329 genes, 3.0%	33 out of 13081 background genes, 0.3%	0.00188	0	GCV2:SAM4:SER33:GCV3:HOM2:SER2:SER1:GCV1:SHM2:MIS11	19284:9089:9070:9097:6563:6531:9113:6546:6564:9249:6544:6730:9257:46656:55114:9088:19464:50667:9086:9090
44711	single-organism biosynthetic process	50 out of 329 genes, 15.2%	524 out of 13081 background genes, 4.0%	0.00196	0	LEU4:SNZ1:SNO1:ARO4:MMD1:ADE4:ADE5,7:SAM4:PPT2:GUA1:SER33:TRP3:FAD3:C1_13330C_A:ATP18:MXR1:ARO3:HOM2:PRS1:SER2:C2_02700C_A:HPT1:ADE8:BAT21:LYS22:HIS3:SER1:IMH3:ASN1:ILV2:ADE2:TRM12:C3_06950W_A:PRO2:LAB5:C4_04720W_A:GDH3:YNK1:ILV3:HIS7:MIS12:ADE1:LYS12:URA5:ADE17:ADE6:ADE13:MIS11:URA2:ARO2	6974:9116:6543:19284:6636:9435:9089:30447:35786:9070:9097:46037:8615:6531:6241:9113:43066:45984:6546:6541:9085:6165:8361:6529:9082:6564:44182:2:6177:9249:6561:32543:42823:43101:18065:6228:30643:9267:32263:30488:46132:6875:46083:6799:6730:36170:70301:9405:44208:61508:30448:6597:1990355:162:9073:6015:9257:44416:19878:15986:6207:71216:46656:55114:46777:6537:9107:9088:6979:31505:19856:51211:36180:939…
6091	generation of precursor metabolites and energy	20 out of 329 genes, 6.1%	126 out of 13081 background genes, 1.0%	0.00205	0	C1_06050C_A:COX5:IDH1:COX6:NDH51:CYT1:C3_02850C_A:C3_04080W_A:RIP1:FUM12:QCR9:SDH12:C5_02190C_A:C5_05230C_A:MAM33:MCI4:CIT1:SDH2:ACO2:ACO1	12501:44262:30447:48315:6102:6123:40009:2:32543:34551:70131:9267:44011:9636:22904:36170:9060:6099:44416:46356:55114:42149:34209:6066:30437:32981:6122:1901089:22900:6103:6106
6753	nucleoside phosphate metabolic process	23 out of 329 genes, 7.0%	162 out of 13081 background genes, 1.2%	0.00262	0	C1_06050C_A:ADE4:ADE5,7:ZWF1:COX5:GUA1:ATP18:PRS1:HPT1:ADE8:COX6:CYT1:IMH3:C3_04080W_A:RIP1:ADE2:QCR9:YNK1:HAM1:ADE1:ADE17:ADE6:ADE13	6974:9116:6006:9435:30447:48315:35786:6123:46037:40009:6241:9113:6165:8361:6740:44182:6177:43101:9217:34551:6228:9267:32263:6875:46083:42542:36170:9405:44208:61508:9060:30448:162:6015:44416:15986:6207:71216:55114:46777:6979:31505:19856:51211:9051:6122:36180:9213:6164:46084:6183:32264:105:6106:6189:33615:35690
462	maturation of SSU-rRNA from tricistronic rRNA transcript (SSU-rRNA, 5.8S rRNA, LSU-rRNA)	16 out of 329 genes, 4.9%	90 out of 13081 background genes, 0.7%	0.00475	0.0003	HBR1:NEP1:CHR1:BUD21:C3_02040C_A:HBR3:C3_04380C_A:C4_05650W_A:HAS1:NOP5:CR_03360W_A:CR_07030C_A:TSR1:UTP5:CR_10410C_A:CR_10470C_A	398:30447:463:42274:42254:43248:36166:6461:48254:34599:1990417:42273:45943:70475:8298:447:462:480:10468:469:6364:461:472:35690
30490	maturation of SSU-rRNA	17 out of 329 genes, 5.2%	101 out of 13081 background genes, 0.8%	0.00524	0.0003	HBR1:NEP1:CHR1:BUD21:C3_02040C_A:HBR3:C3_04380C_A:C4_05650W_A:HAS1:NOP5:LSM6:CR_03360W_A:CR_07030C_A:TSR1:UTP5:CR_10410C_A:CR_10470C_A	398:30447:463:42274:42254:43248:36166:6461:48254:30490:34599:1990417:42273:45943:70475:8298:447:462:480:10468:469:6364:461:472:35690
9117	nucleotide metabolic process	22 out of 329 genes, 6.7%	157 out of 13081 background genes, 1.2%	0.00538	0.0003	C1_06050C_A:ADE4:ADE5,7:ZWF1:COX5:GUA1:ATP18:PRS1:HPT1:ADE8:COX6:CYT1:IMH3:C3_04080W_A:RIP1:ADE2:QCR9:YNK1:ADE1:ADE17:ADE6:ADE13	6974:9116:6006:9435:30447:48315:35786:6123:46037:40009:6241:9113:6165:8361:6740:44182:6177:43101:34551:6228:9267:32263:6875:46083:42542:36170:9405:44208:61508:9060:30448:162:6015:44416:15986:6207:71216:55114:46777:6979:31505:19856:51211:9051:6122:36180:6164:46084:6183:32264:105:6106:6189:33615:35690
463	maturation of LSU-rRNA from tricistronic rRNA transcript (SSU-rRNA, 5.8S rRNA, LSU-rRNA)	10 out of 329 genes, 3.0%	37 out of 13081 background genes, 0.3%	0.00597	0.0003	NOP4:RPF2:C2_05750W_A:MAK16:RPF1:C4_05330C_A:HAS1:NIP7:CR_04170W_A:CR_07080W_A	55:70507:27:42274:463:1902626:1990417:42256:70475:462:54:42255:466:32956:6469:35690
6730	one-carbon metabolic process	6 out of 329 genes, 1.8%	12 out of 13081 background genes, 0.1%	0.00776	0.0003	GCV2:GCV3:C4_04720W_A:GCV1:SHM2:MIS11	6563:9113:6546:9249:6544:6730:9257:46656:55114:19464:9396
1901657	glycosyl compound metabolic process	18 out of 329 genes, 5.5%	116 out of 13081 background genes, 0.9%	0.00912	0.0003	C1_06050C_A:ADE4:SAM4:COX5:GUA1:ATP18:PRS1:HPT1:COX6:CYT1:IMH3:C3_04080W_A:RIP1:TRM12:QCR9:YNK1:URA5:ADE13	6974:9116:19284:9435:30447:48315:35786:6123:46037:40009:6241:9113:6165:8361:6177:43101:34551:6228:9267:32263:30488:46132:46083:36170:44208:61508:9060:30448:162:6015:44416:15986:6207:71216:55114:46777:6979:31505:19856:51211:6122:36180:50667:6183:32264:105:6106:6189:33615:31591:35690
9081	branched-chain amino acid metabolic process	7 out of 329 genes, 2.1%	18 out of 13081 background genes, 0.1%	0.01031	0.0003	LEU4:MMD1:HOM2:BAT21:ILV2:BAT22:ILV3	9089:9097:6531:8152:9082:2:32543:55114:9088:9099:9086:9081:9083:9098:35690:9090
1901564	organonitrogen compound metabolic process	72 out of 329 genes, 21.9%	911 out of 13081 background genes, 7.0%	0.01105	0.0003	LEU4:HMX1:SNZ1:SNO1:C1_03620C_A:ARO4:C1_06050C_A:MMD1:ADE4:ADE5,7:GCV2:SAM4:C1_08820C_A:ZWF1:COX5:GUA1:SER33:TRP3:C1_13330C_A:GCV3:ATP18:C2_00630C_A:MXR1:ARO3:HOM2:PRS1:SER2:C2_02700C_A:HPT1:ADE8:COX6:C2_03950W_A:BAT21:LYS22:HIS3:CYT1:AAT1:SER1:IMH3:ASN1:ILV2:C3_04080W_A:RIP1:ADE2:BAT22:TRM12:CAM1:PRO2:QCR9:EFB1:C4_04720W_A:GDH3:YNK1:ILV3:GCV1:SHM2:HIS7:MIS12:CR_00490W_A:ADE1:LYS12:URA5:RPL28:ADE…	6974:9116:6006:6543:19284:45944:9435:9089:30447:48315:35786:9070:6123:9097:46037:40009:42254:6520:8615:6563:6451:6531:6241:9113:43066:45984:8152:6546:1990145:6541:9085:6165:8361:6740:6529:9082:1300:6564:44182:2:6177:42167:9249:6561:6544:32543:42823:6788:43101:34551:6228:9267:32263:30488:2181:46132:6412:6875:46083:42542:6730:36170:70301:6879:9405:256:44208:61508:9060:30448:6597:1990355:162:9073:60…
42440	pigment metabolic process	9 out of 329 genes, 2.7%	32 out of 13081 background genes, 0.2%	0.01215	0.0003	HMX1:ADE4:ADE5,7:ADE8:SER1:ADE2:C4_04720W_A:ADE1:MIS11	9116:30447:9113:6546:6564:44182:42167:6788:6875:46083:6730:6879:9405:9257:46656:55114:6979:9396:6164:46084:34465:6106:6189
10257	NADH dehydrogenase complex assembly	6 out of 329 genes, 1.8%	13 out of 13081 background genes, 0.1%	0.01382	0.0003	ALI1:NUO2:FESUR1:CR_01300W_A:MCI4:CR_02620C_A	12501:16226:22904:9405:55114:30437:32981
32981	mitochondrial respiratory chain complex I assembly	6 out of 329 genes, 1.8%	13 out of 13081 background genes, 0.1%	0.01382	0.0003	ALI1:NUO2:FESUR1:CR_01300W_A:MCI4:CR_02620C_A	12501:16226:22904:9405:55114:30437:32981
9082	branched-chain amino acid biosynthetic process	6 out of 329 genes, 1.8%	13 out of 13081 background genes, 0.1%	0.01382	0.0003	LEU4:MMD1:HOM2:BAT21:ILV2:ILV3	9089:9097:6531:9082:2:32543:55114:9088:9099:9086:9083:9098:35690:9090
97031	mitochondrial respiratory chain complex I biogenesis	6 out of 329 genes, 1.8%	13 out of 13081 background genes, 0.1%	0.01382	0.0003	ALI1:NUO2:FESUR1:CR_01300W_A:MCI4:CR_02620C_A	12501:16226:22904:9405:55114:30437:32981
470	maturation of LSU-rRNA	10 out of 329 genes, 3.0%	41 out of 13081 background genes, 0.3%	0.01613	0.0003	NOP4:RPF2:C2_05750W_A:MAK16:RPF1:C4_05330C_A:HAS1:NIP7:CR_04170W_A:CR_07080W_A	55:70507:27:42274:463:1902626:1990417:42256:70475:462:54:42255:466:32956:6469:35690
9165	nucleotide biosynthetic process	14 out of 329 genes, 4.3%	78 out of 13081 background genes, 0.6%	0.0164	0.0003	ADE4:ADE5,7:GUA1:ATP18:PRS1:HPT1:ADE8:IMH3:ADE2:YNK1:ADE1:ADE17:ADE6:ADE13	6974:9116:9435:30447:35786:46037:6241:9113:6165:8361:44182:6177:43101:6228:9267:32263:6875:46083:36170:9405:44208:61508:30448:162:6015:44416:15986:6207:71216:55114:46777:6979:31505:19856:51211:36180:6164:46084:6183:32264:105:6106:6189:33615:35690
9116	nucleoside metabolic process	17 out of 329 genes, 5.2%	111 out of 13081 background genes, 0.8%	0.01914	0.0003	C1_06050C_A:ADE4:SAM4:COX5:GUA1:ATP18:PRS1:HPT1:COX6:CYT1:IMH3:C3_04080W_A:RIP1:QCR9:YNK1:URA5:ADE13	6974:9116:19284:9435:30447:48315:35786:6123:46037:40009:6241:9113:6165:8361:6177:43101:34551:6228:9267:32263:46132:46083:36170:44208:61508:9060:30448:162:6015:44416:15986:6207:71216:55114:46777:6979:31505:19856:51211:6122:36180:50667:6183:32264:105:6106:6189:33615:35690
22900	electron transport chain	9 out of 329 genes, 2.7%	34 out of 13081 background genes, 0.3%	0.02083	0.0003	C1_06050C_A:COX5:COX6:CYT1:C3_04080W_A:RIP1:QCR9:SDH12:MCI4	48315:6123:40009:34551:22904:9060:6099:55114:32981:6122:22900
1901293	nucleoside phosphate biosynthetic process	14 out of 329 genes, 4.3%	80 out of 13081 background genes, 0.6%	0.02211	0.0003	ADE4:ADE5,7:GUA1:ATP18:PRS1:HPT1:ADE8:IMH3:ADE2:YNK1:ADE1:ADE17:ADE6:ADE13	6974:9116:9435:30447:35786:46037:6241:9113:6165:8361:44182:6177:43101:6228:9267:32263:6875:46083:36170:9405:44208:61508:30448:162:6015:44416:15986:6207:71216:55114:46777:6979:31505:19856:51211:36180:6164:46084:6183:32264:105:6106:6189:33615:35690
1901070	guanosine-containing compound biosynthetic process	4 out of 329 genes, 1.2%	5 out of 13081 background genes, 0.0%	0.02239	0.0003	GUA1:HPT1:IMH3:YNK1	6974:30447:46037:6241:6165:6177:6228:9267:32263:36170:61508:30448:44416:71216:55114:46777:6979:51211:36180:6183:32264:35690
9097	isoleucine biosynthetic process	4 out of 329 genes, 1.2%	5 out of 13081 background genes, 0.0%	0.02239	0.0002	MMD1:HOM2:BAT21:ILV2	9089:9097:6531:2:32543:55114:9088:9099:9086:9083:9098:9090
42274	ribosomal small subunit biogenesis	17 out of 329 genes, 5.2%	118 out of 13081 background genes, 0.9%	0.04295	0.0005	HBR1:NEP1:CHR1:BUD21:C3_02040C_A:HBR3:C3_04380C_A:C4_05650W_A:HAS1:NOP5:LSM6:CR_03360W_A:CR_07030C_A:TSR1:UTP5:CR_10410C_A:CR_10470C_A	398:30447:463:42274:42254:43248:36166:6461:48254:30490:34599:1990417:42273:45943:70475:8298:447:462:480:10468:469:6364:461:472:35690
43648	dicarboxylic acid metabolic process	8 out of 329 genes, 2.4%	29 out of 13081 background genes, 0.2%	0.04297	0.0005	HOM2:C2_02700C_A:FUM12:GDH3:C5_02190C_A:ADE1:ADE13:MIS11	9089:9097:6531:9113:6546:6730:44208:6099:9257:46656:55114:6537:9088:46084:6103:9086:6189:6106:9090
46083	adenine metabolic process	5 out of 329 genes, 1.5%	10 out of 13081 background genes, 0.1%	0.04616	0.0005	ADE4:ADE5,7:ADE8:ADE2:ADE1	9116:30447:9113:44182:6875:46083:9405:6164:46084:6106:6189
6122	mitochondrial electron transport, ubiquinol to cytochrome c	5 out of 329 genes, 1.5%	10 out of 13081 background genes, 0.1%	0.04616	0.0005	C1_06050C_A:CYT1:C3_04080W_A:RIP1:QCR9	48315:40009:34551:9060:6122
46148	pigment biosynthetic process	8 out of 329 genes, 2.4%	30 out of 13081 background genes, 0.2%	0.05614	0.0007	ADE4:ADE5,7:ADE8:SER1:ADE2:C4_04720W_A:ADE1:MIS11	9116:30447:9113:6546:6564:44182:6875:46083:6730:9405:9257:46656:55114:9396:6164:46084:6106:6189
6139	nucleobase-containing compound metabolic process	89 out of 329 genes, 27.1%	1253 out of 13081 background genes, 9.6%	0.05802	0.0007	HBR1:TRM2:MGM101:RAD16:NOP4:C1_06050C_A:ADE4:ADE5,7:SAM4:ZWF1:COX5:GUA1:RPA34:C1_11000C_A:NEP1:CHR1:ATP18:REX2:PRS1:HPT1:ADE8:COX6:RAD32:CYT1:RPF2:C2_05750W_A:SER1:MEC3:MAK16:IMH3:C2_09500W_A:C2_10810W_A:BUD21:C3_02040C_A:HBR3:C3_04080W_A:C3_04380C_A:RIP1:ADE2:TRM12:C3_06760W_A:C4_00880W_A:SEN2:HCA4:QCR9:RPF1:C4_03730C_A:C4_04720W_A:C4_05330C_A:C4_05650W_A:C4_07010C_A:C5_01430C_A:YNK1:HAM1:HAS1:C…	398:6974:9116:6006:6543:19284:7329:9435:55:31939:70507:27:30447:1902775:42274:6281:463:48315:35786:9409:7004:42797:6123:722:46037:40009:70534:42254:492:70901:6241:294:9113:42787:742:34605:45984:6546:6541:6165:8361:6740:34087:42981:226:31497:724:43248:36166:6461:71894:6564:1990920:1902626:44182:6290:2:6177:42276:48254:34476:6307:30490:43101:9217:6366:34551:18003:6228:34599:9267:32263:30488:6302:19…
6549	isoleucine metabolic process	4 out of 329 genes, 1.2%	6 out of 13081 background genes, 0.0%	0.06459	0.0009	MMD1:HOM2:BAT21:ILV2	9089:9097:6531:2:32543:55114:9088:9099:9086:9083:9098:9090
22904	respiratory electron transport chain	8 out of 329 genes, 2.4%	31 out of 13081 background genes, 0.2%	0.0725	0.0009	C1_06050C_A:COX5:COX6:CYT1:C3_04080W_A:RIP1:QCR9:MCI4	48315:6123:40009:34551:22904:9060:32981:6122
6177	GMP biosynthetic process	3 out of 329 genes, 0.9%	3 out of 13081 background genes, 0.0%	0.09633	0.0013	GUA1:HPT1:IMH3	30447:46037:6177:9267:32263:36170:44416:71216:55114:36180:32264:35690

## Sheet: 3. GO process - DOWN genes
GO processes of all genes with decreased RNA PolII occupancy in the cas5∆/cas5∆ mutant in comparison to the wild type strain under basal condition.
GOID	GO term	Cluster frequency	Background frequency	Corrected P-value	False discovery rate	Gene(s) annotated to the term	Directly Annotated GOID List
44723	single-organism carbohydrate metabolic process	33 out of 275 genes, 12.0%	152 out of 13081 background genes, 1.2%	7.67e-13	0	C1_01360C_A:XOG1:TPS2:GPM2:ATC1:ADH2:ENO1:DAK2:C1_14060W_A:BCY1:GPM1:CDC19:TPK2:TPS3:RHR2:FOX2:C3_03410C_A:TDH3:TPI1:FBA1:GDB1:SOU1:PDC11:GDE1:PFK1:PGK1:C6_02420W_A:BMT4:GPH1:PFK2:GSY1:PGI1:GLK1	6096:70879:43936:6006:30448:32889:5979:1900445:43709:51701:34478:6635:42760:61621:44114:45762:51156:46580:30447:6013:1903759:6002:1932:44416:31589:48315:6567:9306:71361:97271:6116:5978:1900231:55114:71216:6468:6559:902:7035:70072:9062:42752:1900444:6094:7163:34605:1900435:1900760:51666:6073:15810:5991:6114:1900436:31505:7160:15976:51453:949:6915:1904541:51211:9847:15886:44406:19660:46323:7186:361…
46031	ADP metabolic process	14 out of 275 genes, 5.1%	21 out of 13081 background genes, 0.2%	2.26e-12	0	GPM2:ADH2:ENO1:GPM1:CDC19:TDH3:TPI1:FBA1:PDC11:PFK1:PGK1:PFK2:PGI1:GLK1	6096:6006:30448:32889:51701:61621:51156:30447:6013:6002:44416:48315:6567:6116:55114:71216:6559:7035:70072:6094:7163:15810:7160:15976:51453:949:6915:51211:15886:44406:19660:46323:36180:44409:19655:42866:30388:9267:6068:6098:15992:46835:1678:36170:6569:72593:43458:947
5975	carbohydrate metabolic process	37 out of 275 genes, 13.5%	202 out of 13081 background genes, 1.5%	4.08e-12	0	C1_01360C_A:XOG1:TPS2:GPM2:ATC1:ADH2:ENO1:DAK2:C1_14060W_A:BCY1:GPM1:CDC19:TPK2:ARA1:TPS3:RHR2:FOX2:C3_03410C_A:TDH3:TPI1:FBA1:GDB1:SOU1:PDC11:SCW11:GDE1:PFK1:PGK1:C6_02420W_A:BMT4:GPH1:PFK2:GSY1:PGI1:GLK1:GLK4:CHT3	6096:70879:43936:920:6006:30448:32889:5975:5979:1900445:43709:51701:34478:6635:44262:42760:61621:44114:45762:51156:46580:30447:6013:1903759:6002:1932:44416:31589:48315:6567:9306:71361:97271:6116:5978:1900231:55114:71216:6468:6559:902:6032:7035:70072:9062:42752:1900444:6094:7163:34605:1900435:1900760:51666:6073:15810:5991:6114:1900436:31505:7160:15976:51453:949:6915:1904541:51211:9847:15886:19752:…
6090	pyruvate metabolic process	15 out of 275 genes, 5.5%	26 out of 13081 background genes, 0.2%	5.04e-12	0	GPM2:ADH2:ENO1:GPM1:CDC19:TDH3:TPI1:FBA1:PDC11:PFK1:PGK1:LAT1:PFK2:PGI1:GLK1	6096:6006:30448:32889:51701:61621:51156:30447:6013:6002:44416:48315:6567:6116:55114:71216:6559:7035:70072:6094:7163:15810:7160:15976:6086:51453:949:6915:51211:15886:44406:19660:46323:36180:44409:19655:42866:30388:9267:6068:6098:15992:46835:1678:36170:6569:72593:43458:947:42867
6096	glycolytic process	12 out of 275 genes, 4.4%	15 out of 13081 background genes, 0.1%	6.77e-12	0	GPM2:ENO1:GPM1:CDC19:TDH3:TPI1:FBA1:PFK1:PGK1:PFK2:PGI1:GLK1	6096:6006:30448:32889:51701:61621:51156:30447:6013:6002:44416:48315:55114:71216:7035:70072:6094:7163:15810:7160:15976:51453:6915:51211:15886:44406:19660:46323:36180:44409:42866:30388:9267:6098:15992:46835:1678:36170:72593
6757	ATP generation from ADP	12 out of 275 genes, 4.4%	15 out of 13081 background genes, 0.1%	6.77e-12	0	GPM2:ENO1:GPM1:CDC19:TDH3:TPI1:FBA1:PFK1:PGK1:PFK2:PGI1:GLK1	6096:6006:30448:32889:51701:61621:51156:30447:6013:6002:44416:48315:55114:71216:7035:70072:6094:7163:15810:7160:15976:51453:6915:51211:15886:44406:19660:46323:36180:44409:42866:30388:9267:6098:15992:46835:1678:36170:72593
9135	purine nucleoside diphosphate metabolic process	14 out of 275 genes, 5.1%	23 out of 13081 background genes, 0.2%	1.48e-11	0	GPM2:ADH2:ENO1:GPM1:CDC19:TDH3:TPI1:FBA1:PDC11:PFK1:PGK1:PFK2:PGI1:GLK1	6096:6006:30448:32889:51701:61621:51156:30447:6013:6002:44416:48315:6567:6116:55114:71216:6559:7035:70072:6094:7163:15810:7160:15976:51453:949:6915:51211:15886:44406:19660:46323:36180:44409:19655:42866:30388:9267:6068:6098:15992:46835:1678:36170:6569:72593:43458:947
9179	purine ribonucleoside diphosphate metabolic process	14 out of 275 genes, 5.1%	23 out of 13081 background genes, 0.2%	1.48e-11	0	GPM2:ADH2:ENO1:GPM1:CDC19:TDH3:TPI1:FBA1:PDC11:PFK1:PGK1:PFK2:PGI1:GLK1	6096:6006:30448:32889:51701:61621:51156:30447:6013:6002:44416:48315:6567:6116:55114:71216:6559:7035:70072:6094:7163:15810:7160:15976:51453:949:6915:51211:15886:44406:19660:46323:36180:44409:19655:42866:30388:9267:6068:6098:15992:46835:1678:36170:6569:72593:43458:947
9132	nucleoside diphosphate metabolic process	15 out of 275 genes, 5.5%	28 out of 13081 background genes, 0.2%	2.27e-11	0	GPM2:ADH2:ENO1:GPM1:CDC19:RNR22:TDH3:TPI1:FBA1:PDC11:PFK1:PGK1:PFK2:PGI1:GLK1	6096:6006:30448:32889:51701:61621:51156:30447:6013:6002:44416:48315:6567:9186:6116:55114:71216:6559:7035:70072:6094:7163:15810:7160:15976:51453:949:6915:51211:15886:44406:19660:46323:36180:44409:19655:42866:30388:9267:6068:6098:15992:46835:1678:36170:6569:72593:43458:947
9185	ribonucleoside diphosphate metabolic process	14 out of 275 genes, 5.1%	25 out of 13081 background genes, 0.2%	7.5e-11	0	GPM2:ADH2:ENO1:GPM1:CDC19:TDH3:TPI1:FBA1:PDC11:PFK1:PGK1:PFK2:PGI1:GLK1	6096:6006:30448:32889:51701:61621:51156:30447:6013:6002:44416:48315:6567:6116:55114:71216:6559:7035:70072:6094:7163:15810:7160:15976:51453:949:6915:51211:15886:44406:19660:46323:36180:44409:19655:42866:30388:9267:6068:6098:15992:46835:1678:36170:6569:72593:43458:947
6165	nucleoside diphosphate phosphorylation	12 out of 275 genes, 4.4%	17 out of 13081 background genes, 0.1%	8.55e-11	0	GPM2:ENO1:GPM1:CDC19:TDH3:TPI1:FBA1:PFK1:PGK1:PFK2:PGI1:GLK1	6096:6006:30448:32889:51701:61621:51156:30447:6013:6002:44416:48315:55114:71216:7035:70072:6094:7163:15810:7160:15976:51453:6915:51211:15886:44406:19660:46323:36180:44409:42866:30388:9267:6098:15992:46835:1678:36170:72593
46939	nucleotide phosphorylation	12 out of 275 genes, 4.4%	20 out of 13081 background genes, 0.2%	1.56e-09	0	GPM2:ENO1:GPM1:CDC19:TDH3:TPI1:FBA1:PFK1:PGK1:PFK2:PGI1:GLK1	6096:6006:30448:32889:51701:61621:51156:30447:6013:6002:44416:48315:55114:71216:7035:70072:6094:7163:15810:7160:15976:51453:6915:51211:15886:44406:19660:46323:36180:44409:42866:30388:9267:6098:15992:46835:1678:36170:72593
44419	interspecies interaction between organisms	43 out of 275 genes, 15.6%	323 out of 13081 background genes, 2.5%	2.39e-09	0	RIM8:XOG1:TPS2:CSH1:ERG3:CAT1:ATC1:PHO100:ENO1:KEX2:SWE1:HAP43:TYE7:HSP70:RBE1:FTR1:SOD4:GPM1:WH11:CDC19:TPK2:YVC1:DSE1:YWP1:ASH1:RHR2:FOX2:TDH3:SLK19:TPI1:CAS5:FBA1:ADH1:FET34:PGK1:PLB1:ALS9:LIP8:NRG1:CSP37:PST3:ALS3:ACE2	6096:43936:90154:1410:6006:36178:32889:1900439:1900445:43709:51701:10969:42760:45944:33215:97316:30447:45991:31589:48315:42710:71361:70417:32955:6468:71467:34605:10895:61393:1900760:6073:8361:15810:6827:6114:90375:1900436:15976:7160:45892:1900189:36176:36281:1904541:36244:9847:36166:86:15886:1900441:7323:44406:42744:71474:44182:33554:6071:7155:320:71470:1900461:71451:44409:6696:10811:6355:6351:19…
44724	single-organism carbohydrate catabolic process	17 out of 275 genes, 6.2%	52 out of 13081 background genes, 0.4%	8.78e-09	0	GPM2:ATC1:ENO1:GPM1:CDC19:TPK2:TDH3:TPI1:FBA1:GDB1:SOU1:PFK1:PGK1:GPH1:PFK2:PGI1:GLK1	6096:43936:6006:32889:1900445:43709:51701:30447:6002:48315:71361:6468:7035:70072:1900760:15810:1900436:7160:15976:51453:9847:15886:44406:19660:33554:44409:5993:42866:9267:44011:6098:70787:42850:5980:10515:46835:1678:45014:36170:9405:30448:61621:44114:51156:6013:1903759:44416:5978:1900231:55114:71216:902:42752:6094:7163:31505:6915:51211:46323:7186:36180:36164:909:7265:10737:30388:1403:71465:9408:1…
16052	carbohydrate catabolic process	17 out of 275 genes, 6.2%	54 out of 13081 background genes, 0.4%	1.75e-08	0	GPM2:ATC1:ENO1:GPM1:CDC19:TPK2:TDH3:TPI1:FBA1:GDB1:SOU1:PFK1:PGK1:GPH1:PFK2:PGI1:GLK1	6096:43936:6006:32889:1900445:43709:51701:30447:6002:48315:71361:6468:7035:70072:1900760:15810:1900436:7160:15976:51453:9847:15886:44406:19660:33554:44409:5993:42866:9267:44011:6098:70787:42850:5980:10515:46835:1678:45014:36170:9405:30448:61621:44114:51156:6013:1903759:44416:5978:1900231:55114:71216:902:42752:6094:7163:31505:6915:51211:46323:7186:36180:36164:909:7265:10737:30388:1403:71465:9408:1…
44712	single-organism catabolic process	34 out of 275 genes, 12.4%	229 out of 13081 background genes, 1.8%	2.92e-08	0	GPM2:ATC1:ADH2:ENO1:GAD1:PLB4.5:GPM1:CDC19:TPK2:FOX2:C3_06280W_A:TDH3:TPI1:SEC61:CAR2:FBA1:CAT2:GDB1:SOU1:PDC11:YDC1:CAR1:GDE1:PFK1:PGK1:PLB1:C6_02420W_A:GPH1:LAT1:PFK2:LIP8:POT1:PGI1:GLK1	6096:43936:6006:32889:9437:1900445:43709:51701:44743:42760:30447:6084:6002:48315:6567:71361:6116:6468:6559:7035:70072:15031:1900760:15810:1900436:7160:15976:51453:70843:9847:15886:44406:90368:19660:33554:6071:44409:31204:5993:42866:34599:9267:44011:6616:6098:19547:70787:42850:5980:10515:46835:1678:45014:36170:6569:46514:947:9405:42867:30448:34478:6635:10121:61621:44114:51156:6013:1903759:30433:44…
44403	symbiosis, encompassing mutualism through parasitism	24 out of 275 genes, 8.7%	126 out of 13081 background genes, 1.0%	1.55e-07	0	RIM8:XOG1:CAT1:ENO1:KEX2:HSP70:FTR1:SOD4:GPM1:CDC19:TPK2:YWP1:RHR2:TDH3:TPI1:CAS5:FBA1:ADH1:PGK1:PLB1:ALS9:NRG1:ALS3:ACE2	6096:43936:1410:6006:36178:32889:1900439:1900445:43709:51701:45944:33215:97316:30447:31589:48315:71361:70417:32955:6468:71467:34605:10895:61393:1900760:6073:15810:6827:6114:1900436:7160:15976:45892:1900189:36281:1904541:36244:9847:15886:1900441:7323:44406:42744:71474:44182:33554:6071:7155:71470:71451:44409:10811:6355:1900464:5993:42866:52559:9267:44011:6616:9636:70787:36177:10515:1901684:42542:45…
51701	interaction with host	17 out of 275 genes, 6.2%	62 out of 13081 background genes, 0.5%	2.04e-07	0	RIM8:CAT1:ENO1:KEX2:HSP70:SOD4:GPM1:CDC19:TPK2:RHR2:TDH3:TPI1:FBA1:ADH1:PGK1:PLB1:ALS3	6096:43936:6006:32889:1900445:43709:51701:33215:30447:48315:6468:71467:34605:1900760:15810:6114:1900436:7160:15976:9847:15886:7323:44406:42744:44182:33554:6071:7155:71470:71451:44409:5993:42866:52559:9267:44011:6616:9636:70787:36177:10515:42542:45014:36171:16337:70301:36170:90472:44407:9405:30260:30448:61621:44114:1903759:6801:44416:43710:9395:1900231:1315:71852:44001:55114:71216:902:42752:6094:3…
72524	pyridine-containing compound metabolic process	17 out of 275 genes, 6.2%	62 out of 13081 background genes, 0.5%	2.04e-07	0	ISN1:GPM2:ADH2:ENO1:GPM1:CDC19:C2_08100W_A:TDH3:TPI1:FBA1:PDC11:PFK1:PGK1:C6_02030C_A:PFK2:PGI1:GLK1	6096:6006:32889:51701:30447:6002:48315:6567:6116:6559:7035:70072:15810:7160:15976:51453:15886:44406:19660:44409:42866:6190:9267:6098:46835:1678:36170:6569:947:71592:46496:30448:61621:9117:51156:6013:44416:55114:71216:6094:7163:304:949:6915:51211:46323:36180:71590:19655:2000377:43065:30388:6068:15992:72593:43458
46496	nicotinamide nucleotide metabolic process	16 out of 275 genes, 5.8%	55 out of 13081 background genes, 0.4%	2.67e-07	0	GPM2:ADH2:ENO1:GPM1:CDC19:C2_08100W_A:TDH3:TPI1:FBA1:PDC11:PFK1:PGK1:C6_02030C_A:PFK2:PGI1:GLK1	6096:6006:32889:51701:30447:6002:48315:6567:6116:6559:7035:70072:15810:7160:15976:51453:15886:44406:19660:44409:42866:9267:6098:46835:1678:36170:6569:947:46496:30448:61621:51156:6013:44416:55114:71216:6094:7163:304:949:6915:51211:46323:36180:19655:2000377:43065:30388:6068:15992:72593:43458
19362	pyridine nucleotide metabolic process	16 out of 275 genes, 5.8%	56 out of 13081 background genes, 0.4%	3.6e-07	0	GPM2:ADH2:ENO1:GPM1:CDC19:C2_08100W_A:TDH3:TPI1:FBA1:PDC11:PFK1:PGK1:C6_02030C_A:PFK2:PGI1:GLK1	6096:6006:32889:51701:30447:6002:48315:6567:6116:6559:7035:70072:15810:7160:15976:51453:15886:44406:19660:44409:42866:9267:6098:46835:1678:36170:6569:947:46496:30448:61621:51156:6013:44416:55114:71216:6094:7163:304:949:6915:51211:46323:36180:19655:2000377:43065:30388:6068:15992:72593:43458
6006	glucose metabolic process	11 out of 275 genes, 4.0%	23 out of 13081 background genes, 0.2%	3.69e-07	0	ADH2:ENO1:GPM1:CDC19:TDH3:TPI1:FBA1:PDC11:PGK1:PGI1:GLK1	6096:6006:32889:51701:30447:6002:48315:6567:6116:6559:15810:7160:15976:15886:44406:19660:44409:42866:9267:6098:46835:1678:36170:6569:947:30448:61621:51156:6013:44416:55114:71216:6094:7163:949:6915:51211:46323:36180:19655:6068:72593:43458
51704	multi-organism process	55 out of 275 genes, 20.0%	562 out of 13081 background genes, 4.3%	4.02e-07	0	RIM8:XOG1:TPS2:ENG1:CSH1:HHF1:ERG3:CAT1:ATC1:PHO100:ENO1:KEX2:SWE1:HAP43:TYE7:HSP70:ROB1:C1_14060W_A:RBE1:FTR1:SOD4:GPM1:WH11:CDC19:TPK2:YVC1:DSE1:YWP1:ASH1:RHR2:FOX2:TRY6:TDH3:SLK19:TPI1:RBT5:CAS5:FBA1:CAT2:MET4:ADH1:FET34:PGK1:PLB1:ALS9:PRX1:LIP8:NRG1:CSP37:QDR1:PST3:HHF22:HHT2:ALS3:ACE2	6096:43936:90154:1410:6006:36178:32889:1900439:9437:1900445:43709:51701:10969:6352:42760:45944:33215:97316:30447:6084:45991:31589:48315:42710:71361:45454:70417:6338:32955:6468:55088:30476:6306:71467:34605:10895:61393:1900760:6073:8361:15810:6827:6114:90375:1900436:15976:7160:45892:1900189:36176:36281:30994:46686:1904541:36244:9847:36166:86:15886:1900441:7323:44406:42744:7094:71474:6334:44182:3355…
6733	oxidoreduction coenzyme metabolic process	16 out of 275 genes, 5.8%	71 out of 13081 background genes, 0.5%	1.59e-05	0	GPM2:ADH2:ENO1:GPM1:CDC19:C2_08100W_A:TDH3:TPI1:FBA1:PDC11:PFK1:PGK1:C6_02030C_A:PFK2:PGI1:GLK1	6096:6006:32889:51701:30447:6002:48315:6567:6116:6559:7035:70072:15810:7160:15976:51453:15886:44406:19660:44409:42866:9267:6098:46835:1678:36170:6569:947:46496:30448:61621:51156:6013:44416:55114:71216:6094:7163:304:949:6915:51211:46323:36180:19655:2000377:43065:30388:6068:15992:72593:43458
32787	monocarboxylic acid metabolic process	23 out of 275 genes, 8.4%	146 out of 13081 background genes, 1.1%	1.78e-05	0	RIM8:GPM2:ERG3:PEX3:ADH2:ENO1:ALD5:GPM1:CDC19:ACS1:FOX2:TDH3:TPI1:FBA1:CAT2:PDC11:PFK1:PGK1:LAT1:PFK2:POT1:PGI1:GLK1	6096:32581:6006:32889:45046:9437:51701:42760:30447:6084:6002:48315:6567:6116:6559:7035:70072:71467:15810:7160:15976:51453:15886:44406:19660:44182:44409:6696:42866:9267:44011:16573:6098:36177:46835:1678:19427:36170:6569:947:9405:42867:30448:6635:61621:51156:6013:6631:44416:55114:71216:9062:6094:45733:7163:19413:19654:6086:949:6915:6085:51211:1900430:45333:46323:36180:19655:7126:1900198:30388:6097:…
19318	hexose metabolic process	12 out of 275 genes, 4.4%	39 out of 13081 background genes, 0.3%	2.41e-05	0	ADH2:ENO1:GPM1:CDC19:TDH3:TPI1:FBA1:SOU1:PDC11:PGK1:PGI1:GLK1	6096:6006:32889:51701:30447:6002:48315:6567:6116:6559:15810:7160:15976:15886:44406:19660:44409:42866:9267:6098:42850:46835:1678:36170:6569:947:30448:61621:51156:6013:44416:55114:71216:6094:7163:949:6915:51211:46323:36180:19655:6068:72593:43458
44262	cellular carbohydrate metabolic process	20 out of 275 genes, 7.3%	115 out of 13081 background genes, 0.9%	2.85e-05	0	C1_01360C_A:XOG1:TPS2:ATC1:DAK2:C1_14060W_A:BCY1:TPK2:ARA1:TPS3:RHR2:FOX2:GDB1:GDE1:C6_02420W_A:BMT4:GPH1:GSY1:GLK1:GLK4	6096:43936:6006:5979:1900445:43709:44262:42760:45762:46580:30447:6002:1932:31589:48315:71361:97271:6468:34605:1900760:51666:6073:6114:1900436:1904541:9847:19660:33554:46827:6071:70135:71470:44409:6355:5993:34599:9267:44011:60257:70787:5980:10515:97237:46835:1678:45014:36170:9405:44407:70879:30448:5975:34478:6635:44114:51156:6013:1903759:9306:5978:1900231:55114:71216:902:9062:42752:1900444:7163:19…
46034	ATP metabolic process	15 out of 275 genes, 5.5%	69 out of 13081 background genes, 0.5%	7.58e-05	0	GPM2:ADH2:ENO1:STF2:GPM1:CDC19:TDH3:TPI1:FBA1:PDC11:PFK1:PGK1:PFK2:PGI1:GLK1	6096:6006:32889:51701:30447:6002:48315:6567:6754:6116:6559:7035:70072:15810:7160:15976:51453:15886:44406:19660:44409:42866:9267:6098:46835:1678:36170:6569:947:30448:61621:51156:6013:44416:55114:71216:6094:7163:949:6915:51211:46323:36180:19655:30388:6068:15992:72593:43458
31589	cell-substrate adhesion	12 out of 275 genes, 4.4%	43 out of 13081 background genes, 0.3%	8.17e-05	0	XOG1:CSH1:TPK2:DSE1:RHR2:TDH3:RBT5:C6_02420W_A:ALS9:NRG1:ALS3:ACE2	6096:43936:1410:6006:36178:1900439:1900445:51701:43709:10969:45944:33215:97316:30447:31589:48315:71361:32955:6468:34605:1900760:6073:6114:1900436:7160:1900189:45892:36281:1904541:36244:9847:15886:1900441:44406:44182:33554:6071:7155:71470:44409:10811:6355:1900464:5993:9267:44011:70787:36177:10515:36171:45014:16337:70301:36170:6879:9405:44407:30260:70879:920:30448:34478:433:70887:44114:9372:1903759…
9205	purine ribonucleoside triphosphate metabolic process	15 out of 275 genes, 5.5%	70 out of 13081 background genes, 0.5%	9.3e-05	0	GPM2:ADH2:ENO1:STF2:GPM1:CDC19:TDH3:TPI1:FBA1:PDC11:PFK1:PGK1:PFK2:PGI1:GLK1	6096:6006:32889:51701:30447:6002:48315:6567:6754:6116:6559:7035:70072:15810:7160:15976:51453:15886:44406:19660:44409:42866:9267:6098:46835:1678:36170:6569:947:30448:61621:51156:6013:44416:55114:71216:6094:7163:949:6915:51211:46323:36180:19655:30388:6068:15992:72593:43458
5996	monosaccharide metabolic process	12 out of 275 genes, 4.4%	44 out of 13081 background genes, 0.3%	0.0001	0	ADH2:ENO1:GPM1:CDC19:TDH3:TPI1:FBA1:SOU1:PDC11:PGK1:PGI1:GLK1	6096:6006:32889:51701:30447:6002:48315:6567:6116:6559:15810:7160:15976:15886:44406:19660:44409:42866:9267:6098:42850:46835:1678:36170:6569:947:30448:61621:51156:6013:44416:55114:71216:6094:7163:949:6915:51211:46323:36180:19655:6068:72593:43458
9199	ribonucleoside triphosphate metabolic process	15 out of 275 genes, 5.5%	71 out of 13081 background genes, 0.5%	0.00011	0	GPM2:ADH2:ENO1:STF2:GPM1:CDC19:TDH3:TPI1:FBA1:PDC11:PFK1:PGK1:PFK2:PGI1:GLK1	6096:6006:32889:51701:30447:6002:48315:6567:6754:6116:6559:7035:70072:15810:7160:15976:51453:15886:44406:19660:44409:42866:9267:6098:46835:1678:36170:6569:947:30448:61621:51156:6013:44416:55114:71216:6094:7163:949:6915:51211:46323:36180:19655:30388:6068:15992:72593:43458
9144	purine nucleoside triphosphate metabolic process	15 out of 275 genes, 5.5%	72 out of 13081 background genes, 0.6%	0.00013	0	GPM2:ADH2:ENO1:STF2:GPM1:CDC19:TDH3:TPI1:FBA1:PDC11:PFK1:PGK1:PFK2:PGI1:GLK1	6096:6006:32889:51701:30447:6002:48315:6567:6754:6116:6559:7035:70072:15810:7160:15976:51453:15886:44406:19660:44409:42866:9267:6098:46835:1678:36170:6569:947:30448:61621:51156:6013:44416:55114:71216:6094:7163:949:6915:51211:46323:36180:19655:30388:6068:15992:72593:43458
6091	generation of precursor metabolites and energy	20 out of 275 genes, 7.3%	126 out of 13081 background genes, 1.0%	0.00013	0	C1_01360C_A:GPM2:ADH2:ENO1:GPM1:CDC19:ACS1:TDH3:TPI1:FBA1:CAT2:GDB1:PDC11:PFK1:PGK1:GPH1:PFK2:GSY1:PGI1:GLK1	6096:6006:32889:9437:51701:30447:6084:6002:48315:6567:6116:6559:7035:70072:15810:7160:15976:51453:15886:44406:19660:44409:42866:9267:44011:16573:6098:5980:46835:1678:19427:36170:6569:947:30448:6635:61621:51156:6013:44416:5978:55114:71216:6094:45733:7163:19654:949:6915:6085:51211:45333:46323:36180:19655:30388:6068:9408:15992:72593:43458
9405	pathogenesis	30 out of 275 genes, 10.9%	260 out of 13081 background genes, 2.0%	0.00018	0	RIM8:TPS2:CSH1:ERG3:CAT1:ATC1:PHO100:KEX2:SWE1:HAP43:TYE7:RBE1:FTR1:WH11:TPK2:YVC1:DSE1:ASH1:RHR2:FOX2:SLK19:CAS5:FET34:PLB1:LIP8:NRG1:CSP37:PST3:ALS3:ACE2	43936:90154:1410:36178:1900439:1900445:43709:51701:10969:42760:45944:33215:97316:30447:45991:48315:42710:71361:70417:32955:6468:71467:34605:10895:61393:1900760:8361:6827:6114:90375:1900436:7160:45892:1900189:36176:36244:9847:36166:86:1900441:7323:44406:42744:71474:44182:33554:6071:7155:320:71470:1900461:44409:6696:10811:6355:6351:1900464:30466:5993:44879:52559:34599:9267:44011:10697:79:60257:1591…
42710	biofilm formation	21 out of 275 genes, 7.6%	143 out of 13081 background genes, 1.1%	0.00026	0	XOG1:CSH1:TYE7:ROB1:WH11:TPK2:YVC1:DSE1:YWP1:RHR2:TRY6:RBT5:CAS5:CAT2:MET4:ADH1:ALS9:NRG1:QDR1:ALS3:ACE2	43936:1410:36178:1900439:9437:1900445:51701:43709:10969:45944:33215:97316:30447:6084:45991:31589:48315:71361:42710:70417:6338:32955:6468:55088:30476:34605:10895:61393:1900760:6073:6114:1900436:15976:7160:45892:1900189:36281:46686:1904541:36244:9847:36166:1900441:44406:71474:44182:33554:6071:7155:71470:44409:10811:6355:6351:1900464:5993:9267:44011:96:16584:70787:36177:10515:36171:45014:1900233:163…
6732	coenzyme metabolic process	20 out of 275 genes, 7.3%	131 out of 13081 background genes, 1.0%	0.00026	0	GPM2:ADH2:ENO1:OSM2:GPM1:CDC19:C2_08100W_A:ACS1:TDH3:TPI1:FBA1:CAT2:PDC11:PFK1:PGK1:C6_02030C_A:LAT1:PFK2:PGI1:GLK1	6096:6006:32889:9437:51701:30447:6084:6002:48315:6567:6116:6559:7035:70072:15810:7160:15976:51453:15886:44406:19660:34975:44409:42866:9267:44011:16573:6098:46835:1678:19427:36170:6569:947:42867:46496:30448:6635:61621:51156:6013:44416:46443:55114:71216:6094:45733:7163:304:19654:6086:949:6915:6085:51211:45333:46323:36180:19655:2000377:43065:30388:6068:15992:72593:43458
9141	nucleoside triphosphate metabolic process	15 out of 275 genes, 5.5%	77 out of 13081 background genes, 0.6%	0.00035	0	GPM2:ADH2:ENO1:STF2:GPM1:CDC19:TDH3:TPI1:FBA1:PDC11:PFK1:PGK1:PFK2:PGI1:GLK1	6096:6006:32889:51701:30447:6002:48315:6567:6754:6116:6559:7035:70072:15810:7160:15976:51453:15886:44406:19660:44409:42866:9267:6098:46835:1678:36170:6569:947:30448:61621:51156:6013:44416:55114:71216:6094:7163:949:6915:51211:46323:36180:19655:30388:6068:15992:72593:43458
50896	response to stimulus	90 out of 275 genes, 32.7%	1359 out of 13081 background genes, 10.4%	0.00037	0	RIM8:C1_01300W_A:ROA1:TPS2:PDR16:HHT21:PIL1:SYG1:ERG3:ZCF2:CAT1:ATC1:CDR4:ENO1:MSN4:KEX2:DAK2:SWE1:FGR41:HAP43:GIN4:GAD1:TYE7:HSP70:ROB1:FTR1:WSC4:SOD4:HGT7:BCY1:MET1:ADAEC:WH11:CDC19:RTA3:DBF2:TPK2:SIT1:C2_08100W_A:RAD57:DSE1:PIR1:STB3:DDR48:FGR29:GAL4:ASH1:C3_00170C_A:RHR2:C3_01910C_A:C3_03680W_A:CMK1:CDR1:FCR1:TDH3:SLK19:TPI1:SEC61:CAR2:CAS5:FBA1:PGA62:AHP1:VTC4:MET4:MSH2:CCN1:HSP12:C5_02110W_…	16237:90154:6974:1410:6006:32889:5979:45944:1900443:15891:33215:46580:921:31939:30447:30491:1932:45991:6281:48315:16126:32463:42710:71361:6116:70417:16239:722:71483:32955:55088:15914:15031:1900760:51666:8361:15810:6827:10972:32187:70843:36176:36281:43942:6749:1900441:15758:1990539:6334:44182:46827:6071:7155:320:71470:71451:23016:61409:61402:48016:6351:61403:1900464:30466:6812:34599:8643:1558:1069…
44710	single-organism metabolic process	82 out of 275 genes, 29.8%	1200 out of 13081 background genes, 9.2%	0.00042	0	RIM8:C1_01360C_A:ISN1:CWH8:XOG1:TPS2:PDR16:GPM2:ERG3:CAT1:ATC1:PEX3:ADH2:ENO1:DAK2:C1_10460W_A:PHO84:GAD1:OSM2:C1_14060W_A:STF2:SOD4:BCY1:PLB4.5:MET1:ALD5:GPM1:CDC19:TPK2:C2_07440C_A:RNR22:C2_08100W_A:ARA1:MET10:ACS1:TPS3:C3_00170C_A:RHR2:FOX2:C3_03410C_A:C3_03680W_A:C3_06280W_A:TDH3:TPI1:SEC61:CAR2:FBA1:CAT2:C4_02420C_A:VTC4:MET4:GDB1:SOU1:PDC11:YDC1:URA4:CAR1:GDE1:PFK1:ADH1:FET34:FET31:PGK1:EBP…	16237:32581:6006:32889:5979:45944:33215:46580:30447:6002:1932:31589:48315:16126:6567:71361:9186:6116:15914:15031:1900760:51666:97080:6827:15810:70843:43942:1904541:90368:19660:44182:34975:46827:6071:71470:71451:23016:48016:8610:6190:34599:60257:6616:6098:6796:96:36177:8202:1901684:97237:46835:42542:1678:160:70301:9405:70879:15677:1903759:6801:6631:30433:2000769:44416:30970:9306:103:5978:19722:190…
6793	phosphorus metabolic process	46 out of 275 genes, 16.7%	527 out of 13081 background genes, 4.0%	0.00045	0	ISN1:PDR16:GPM2:ADH2:ENO1:C1_09610W_A:SWE1:C1_10460W_A:GIN4:PHO84:OSM2:STF2:BCY1:PLB4.5:GPM1:CDC19:DBF2:TPK2:RNR22:C2_08100W_A:ACS1:C3_00170C_A:CMK1:TDH3:TPI1:FBA1:CAT2:C4_02420C_A:VTC4:PDC11:URA4:GDE1:PFK1:PGK1:PLB1:C6_02030C_A:C6_02420W_A:RIM15:LAT1:PFK2:PHO81:PHO112:VTC3:PGI1:GLK1:GLK4	16237:90154:6006:32889:5979:46580:921:30447:6002:1932:48315:16126:6567:32463:9186:6116:15914:1900760:51666:97080:8361:15810:43942:19660:44182:34975:6071:46827:320:23016:48016:6190:34599:1558:10697:6098:6796:46835:1678:71574:160:9405:1902854:1903759:2000769:44416:9306:1900231:44001:46434:44878:902:46777:42752:1900444:5991:6086:6221:6915:6085:910:45333:36168:7186:61167:36164:51447:1902846:31031:196…
52031	modulation by symbiont of host defense response	9 out of 275 genes, 3.3%	26 out of 13081 background genes, 0.2%	0.00046	0	ENO1:KEX2:HSP70:CDC19:TDH3:TPI1:FBA1:ADH1:PGK1	6006:32889:30447:15810:71470:6616:9405:44416:6915:16540:6457:36168:71432:16485:6096:51701:34605:7160:15976:15886:7323:44406:44409:42866:52559:9267:44011:9636:36170:90472:44407:30260:61621:44114:71852:55114:71216:6094:36180:72593
52255	modulation by organism of defense response of other organism involved in symbiotic interaction	9 out of 275 genes, 3.3%	26 out of 13081 background genes, 0.2%	0.00046	0	ENO1:KEX2:HSP70:CDC19:TDH3:TPI1:FBA1:ADH1:PGK1	6006:32889:30447:15810:71470:6616:9405:44416:6915:16540:6457:36168:71432:16485:6096:51701:34605:7160:15976:15886:7323:44406:44409:42866:52559:9267:44011:9636:36170:90472:44407:30260:61621:44114:71852:55114:71216:6094:36180:72593
31349	positive regulation of defense response	8 out of 275 genes, 2.9%	20 out of 13081 background genes, 0.2%	0.00056	0	ENO1:HSP70:CDC19:TDH3:TPI1:FBA1:ADH1:PGK1	6006:32889:30447:15810:6616:44416:6915:6457:6096:51701:34605:7160:15976:15886:44406:44409:42866:9267:44011:9636:36170:44407:30260:61621:55114:71216:6094:36180:72593
44416	induction by symbiont of host defense response	8 out of 275 genes, 2.9%	20 out of 13081 background genes, 0.2%	0.00056	0	ENO1:HSP70:CDC19:TDH3:TPI1:FBA1:ADH1:PGK1	6006:32889:30447:15810:6616:44416:6915:6457:6096:51701:34605:7160:15976:15886:44406:44409:42866:9267:44011:9636:36170:44407:30260:61621:55114:71216:6094:36180:72593
52251	induction by organism of defense response of other organism involved in symbiotic interaction	8 out of 275 genes, 2.9%	20 out of 13081 background genes, 0.2%	0.00056	0	ENO1:HSP70:CDC19:TDH3:TPI1:FBA1:ADH1:PGK1	6006:32889:30447:15810:6616:44416:6915:6457:6096:51701:34605:7160:15976:15886:44406:44409:42866:9267:44011:9636:36170:44407:30260:61621:55114:71216:6094:36180:72593
52509	positive regulation by symbiont of host defense response	8 out of 275 genes, 2.9%	20 out of 13081 background genes, 0.2%	0.00056	0	ENO1:HSP70:CDC19:TDH3:TPI1:FBA1:ADH1:PGK1	6006:32889:30447:15810:6616:44416:6915:6457:6096:51701:34605:7160:15976:15886:44406:44409:42866:9267:44011:9636:36170:44407:30260:61621:55114:71216:6094:36180:72593
52510	positive regulation by organism of defense response of other organism involved in symbiotic interaction	8 out of 275 genes, 2.9%	20 out of 13081 background genes, 0.2%	0.00056	0	ENO1:HSP70:CDC19:TDH3:TPI1:FBA1:ADH1:PGK1	6006:32889:30447:15810:6616:44416:6915:6457:6096:51701:34605:7160:15976:15886:44406:44409:42866:9267:44011:9636:36170:44407:30260:61621:55114:71216:6094:36180:72593
31347	regulation of defense response	9 out of 275 genes, 3.3%	27 out of 13081 background genes, 0.2%	0.00066	0	ENO1:KEX2:HSP70:CDC19:TDH3:TPI1:FBA1:ADH1:PGK1	6006:32889:30447:15810:71470:6616:9405:44416:6915:16540:6457:36168:71432:16485:6096:51701:34605:7160:15976:15886:7323:44406:44409:42866:52559:9267:44011:9636:36170:90472:44407:30260:61621:44114:71852:55114:71216:6094:36180:72593
44699	single-organism process	152 out of 275 genes, 55.3%	2766 out of 13081 background genes, 21.1%	0.00078	0	RIM8:C1_01300W_A:C1_01360C_A:ISN1:CWH8:XOG1:TPS2:ENG1:PDR16:HHF1:GPM2:SYG1:ERG3:ZCF2:CAT1:ATC1:PEX3:C1_07440W_A:CDR4:ADH2:SDS24:ENO1:PCL2:MSN4:KEX2:DAK2:SWE1:C1_10360C_A:FGR41:C1_10460W_A:HAP43:GIN4:PHO84:GAD1:TYE7:ROB1:OSM2:SIM1:C1_14060W_A:RBE1:FTR1:STF2:SOD4:HGT7:HGT8:HGT6:BCY1:PLB4.5:AMN1:ZRT2:MET1:ALD5:GPM1:CDC19:GIT1:DBF2:FRP3:TPK2:C2_07440C_A:RNR22:YVC1:SIT1:C2_08100W_A:RAD57:MAF1:ARA1:DSE…	16237:32581:6974:90154:1410:6006:32889:5979:6279:15794:45944:1900443:15891:33215:46580:921:30447:30491:6002:1932:45991:6281:31589:48315:55085:16126:6501:6567:32463:42710:71361:9186:9272:6116:70417:16239:722:71483:32955:55088:15914:6847:15031:1900760:51666:97080:8361:32366:15810:6827:10972:32187:70843:36176:43942:1904541:6749:1900441:15758:90368:19660:1990539:6334:44182:34975:46827:6071:7155:320:7…
7155	cell adhesion	13 out of 275 genes, 4.7%	62 out of 13081 background genes, 0.5%	0.00089	0	XOG1:CSH1:TPK2:DSE1:RHR2:TDH3:RBT5:C5_02110W_A:C6_02420W_A:ALS9:NRG1:ALS3:ACE2	1410:6006:45944:33215:30447:31589:48315:71361:32955:1900760:10972:36281:1904541:1900441:44182:6071:7155:71470:1900464:34599:36177:16337:70301:6879:9405:70879:433:70887:9372:1903759:44416:43710:1900231:902:42149:42752:1900444:45827:6915:60196:7186:36164:43708:83:7009:10737:122:1403:72353:6878:6096:43936:36178:1900439:1900445:51701:43709:10969:97316:6468:34605:6073:6114:1900436:7160:1900189:45892:3…
44003	modification by symbiont of host morphology or physiology	9 out of 275 genes, 3.3%	28 out of 13081 background genes, 0.2%	0.00094	0	ENO1:KEX2:HSP70:CDC19:TDH3:TPI1:FBA1:ADH1:PGK1	6006:32889:30447:15810:71470:6616:9405:44416:6915:16540:6457:36168:71432:16485:6096:51701:34605:7160:15976:15886:7323:44406:44409:42866:52559:9267:44011:9636:36170:90472:44407:30260:61621:44114:71852:55114:71216:6094:36180:72593
51817	modification of morphology or physiology of other organism involved in symbiotic interaction	9 out of 275 genes, 3.3%	28 out of 13081 background genes, 0.2%	0.00094	0	ENO1:KEX2:HSP70:CDC19:TDH3:TPI1:FBA1:ADH1:PGK1	6006:32889:30447:15810:71470:6616:9405:44416:6915:16540:6457:36168:71432:16485:6096:51701:34605:7160:15976:15886:7323:44406:44409:42866:52559:9267:44011:9636:36170:90472:44407:30260:61621:44114:71852:55114:71216:6094:36180:72593
42278	purine nucleoside metabolic process	16 out of 275 genes, 5.8%	94 out of 13081 background genes, 0.7%	0.00097	0	ISN1:GPM2:ADH2:ENO1:STF2:GPM1:CDC19:TDH3:TPI1:FBA1:PDC11:PFK1:PGK1:PFK2:PGI1:GLK1	6006:32889:30447:6002:48315:6567:6116:15810:19660:6190:6098:46835:1678:44416:6915:19655:6068:43458:6096:51701:6754:6559:7035:70072:7160:15976:51453:15886:44406:44409:42866:9267:36170:6569:947:71592:30448:61621:9117:51156:6013:55114:71216:6094:7163:949:51211:46323:36180:71590:30388:15992:72593
46128	purine ribonucleoside metabolic process	16 out of 275 genes, 5.8%	94 out of 13081 background genes, 0.7%	0.00097	0	ISN1:GPM2:ADH2:ENO1:STF2:GPM1:CDC19:TDH3:TPI1:FBA1:PDC11:PFK1:PGK1:PFK2:PGI1:GLK1	6006:32889:30447:6002:48315:6567:6116:15810:19660:6190:6098:46835:1678:44416:6915:19655:6068:43458:6096:51701:6754:6559:7035:70072:7160:15976:51453:15886:44406:44409:42866:9267:36170:6569:947:71592:30448:61621:9117:51156:6013:55114:71216:6094:7163:949:51211:46323:36180:71590:30388:15992:72593
35821	modification of morphology or physiology of other organism	9 out of 275 genes, 3.3%	29 out of 13081 background genes, 0.2%	0.00132	0	ENO1:KEX2:HSP70:CDC19:TDH3:TPI1:FBA1:ADH1:PGK1	6006:32889:30447:15810:71470:6616:9405:44416:6915:16540:6457:36168:71432:16485:6096:51701:34605:7160:15976:15886:7323:44406:44409:42866:52559:9267:44011:9636:36170:90472:44407:30260:61621:44114:71852:55114:71216:6094:36180:72593
43436	oxoacid metabolic process	35 out of 275 genes, 12.7%	366 out of 13081 background genes, 2.8%	0.00163	0	RIM8:GPM2:ERG3:PEX3:ADH2:ENO1:PHO84:GAD1:MET1:ALD5:GPM1:CDC19:ARA1:ACS1:C3_00170C_A:FOX2:C3_03680W_A:C3_06280W_A:TDH3:TPI1:CAR2:FBA1:CAT2:VTC4:MET4:PDC11:CAR1:PFK1:PGK1:LAT1:PFK2:POT1:VTC3:PGI1:GLK1	16237:32581:6006:32889:45944:30447:6002:48315:6567:6116:97080:15810:90368:19660:44182:48016:34599:6098:96:36177:46835:1678:9405:6631:2000769:44416:19722:9062:19413:6665:6086:6915:6085:19752:45333:6538:46685:19655:6828:6817:1900198:19354:1904728:6097:16485:8104:1403:6068:6797:6357:43458:6096:45046:9437:51701:44262:42760:6084:6559:7035:70072:71467:7160:15976:51453:1900189:46686:15886:44406:44409:66…
6082	organic acid metabolic process	35 out of 275 genes, 12.7%	367 out of 13081 background genes, 2.8%	0.00174	0	RIM8:GPM2:ERG3:PEX3:ADH2:ENO1:PHO84:GAD1:MET1:ALD5:GPM1:CDC19:ARA1:ACS1:C3_00170C_A:FOX2:C3_03680W_A:C3_06280W_A:TDH3:TPI1:CAR2:FBA1:CAT2:VTC4:MET4:PDC11:CAR1:PFK1:PGK1:LAT1:PFK2:POT1:VTC3:PGI1:GLK1	16237:32581:6006:32889:45944:30447:6002:48315:6567:6116:97080:15810:90368:19660:44182:48016:34599:6098:96:36177:46835:1678:9405:6631:2000769:44416:19722:9062:19413:6665:6086:6915:6085:19752:45333:6538:46685:19655:6828:6817:1900198:19354:1904728:6097:16485:8104:1403:6068:6797:6357:43458:6096:45046:9437:51701:44262:42760:6084:6559:7035:70072:71467:7160:15976:51453:1900189:46686:15886:44406:44409:66…
44010	single-species biofilm formation	19 out of 275 genes, 6.9%	135 out of 13081 background genes, 1.0%	0.00192	0	XOG1:CSH1:TYE7:ROB1:WH11:TPK2:DSE1:YWP1:RHR2:TRY6:RBT5:CAS5:CAT2:MET4:ADH1:ALS9:NRG1:ALS3:ACE2	1410:45944:33215:30447:45991:31589:48315:71361:70417:32955:1900760:36281:1904541:1900441:44182:6071:7155:71470:6351:1900464:96:36177:16337:70301:6879:9405:70879:44010:433:70887:9372:1903759:44416:43710:1900231:902:42149:42752:1900444:45827:6950:45333:60196:7186:36164:43708:46685:83:10737:45821:122:1403:6357:72353:6878:71456:43936:36178:1900439:9437:1900445:51701:43709:10969:97316:6084:6338:6468:3…
22610	biological adhesion	15 out of 275 genes, 5.5%	88 out of 13081 background genes, 0.7%	0.0021	0	XOG1:CSH1:TPK2:DSE1:YWP1:RHR2:TDH3:RBT5:C5_02110W_A:ADH1:C6_02420W_A:ALS9:NRG1:ALS3:ACE2	1410:6006:45944:33215:30447:31589:48315:71361:32955:1900760:10972:36281:1904541:1900441:44182:6071:7155:71470:1900464:34599:36177:16337:70301:6879:9405:70879:44010:433:70887:9372:1903759:44416:43710:1900231:902:42149:42752:1900444:45827:6915:60196:7186:36164:43708:83:7009:10737:122:1403:72353:6878:6096:43936:36178:1900439:1900445:51701:43709:10969:97316:6468:34605:6073:6114:1900436:7160:1900189:4…
9126	purine nucleoside monophosphate metabolic process	15 out of 275 genes, 5.5%	88 out of 13081 background genes, 0.7%	0.0021	0	GPM2:ADH2:ENO1:STF2:GPM1:CDC19:TDH3:TPI1:FBA1:PDC11:PFK1:PGK1:PFK2:PGI1:GLK1	6006:32889:30447:6002:48315:6567:6116:15810:19660:6098:46835:1678:44416:6915:19655:6068:43458:6096:51701:6754:6559:7035:70072:7160:15976:51453:15886:44406:44409:42866:9267:36170:6569:947:30448:61621:51156:6013:55114:71216:6094:7163:949:51211:46323:36180:30388:15992:72593
9167	purine ribonucleoside monophosphate metabolic process	15 out of 275 genes, 5.5%	88 out of 13081 background genes, 0.7%	0.0021	0	GPM2:ADH2:ENO1:STF2:GPM1:CDC19:TDH3:TPI1:FBA1:PDC11:PFK1:PGK1:PFK2:PGI1:GLK1	6006:32889:30447:6002:48315:6567:6116:15810:19660:6098:46835:1678:44416:6915:19655:6068:43458:6096:51701:6754:6559:7035:70072:7160:15976:51453:15886:44406:44409:42866:9267:36170:6569:947:30448:61621:51156:6013:55114:71216:6094:7163:949:51211:46323:36180:30388:15992:72593
6753	nucleoside phosphate metabolic process	21 out of 275 genes, 7.6%	162 out of 13081 background genes, 1.2%	0.00216	0	ISN1:GPM2:ADH2:ENO1:OSM2:STF2:GPM1:CDC19:RNR22:C2_08100W_A:TDH3:TPI1:FBA1:PDC11:URA4:PFK1:PGK1:C6_02030C_A:PFK2:PGI1:GLK1	6006:32889:30447:6002:48315:6567:9186:6116:15810:19660:34975:6190:6098:46835:1678:44416:6221:6915:19655:2000377:43065:6068:43458:6096:51701:6754:6559:7035:70072:7160:15976:51453:15886:44406:44409:42866:9267:36170:6569:947:71592:46496:30448:61621:9117:51156:6013:46443:6207:55114:71216:6094:7163:304:949:51211:46323:36180:71590:30388:15992:72593
9605	response to external stimulus	33 out of 275 genes, 12.0%	344 out of 13081 background genes, 2.6%	0.00311	0	RIM8:TPS2:CAT1:ATC1:ENO1:MSN4:KEX2:FGR41:HAP43:TYE7:HSP70:FTR1:SOD4:BCY1:CDC19:TPK2:DSE1:STB3:DDR48:FGR29:GAL4:ASH1:C3_03680W_A:FCR1:TDH3:TPI1:FBA1:ADH1:FET34:PGK1:RIM15:NRG1:ECM4	1410:6006:32889:5979:45944:33215:46580:30447:1932:45991:6281:48315:71361:71483:1900760:51666:15810:6827:36176:6749:1900441:44182:46827:7155:71470:71451:23016:61409:61402:6351:61403:1900464:34599:61395:60257:6616:36177:1901684:42542:160:70301:9405:61406:61405:433:9372:2000220:1903759:6801:44416:9306:19722:1900231:1315:902:42149:42752:1900444:45827:5991:6665:61434:6915:19752:16540:6457:36168:7186:9…
9161	ribonucleoside monophosphate metabolic process	15 out of 275 genes, 5.5%	91 out of 13081 background genes, 0.7%	0.00326	0	GPM2:ADH2:ENO1:STF2:GPM1:CDC19:TDH3:TPI1:FBA1:PDC11:PFK1:PGK1:PFK2:PGI1:GLK1	6006:32889:30447:6002:48315:6567:6116:15810:19660:6098:46835:1678:44416:6915:19655:6068:43458:6096:51701:6754:6559:7035:70072:7160:15976:51453:15886:44406:44409:42866:9267:36170:6569:947:30448:61621:51156:6013:55114:71216:6094:7163:949:51211:46323:36180:30388:15992:72593
9266	response to temperature stimulus	17 out of 275 genes, 6.2%	115 out of 13081 background genes, 0.9%	0.00341	0	TPS2:PIL1:ATC1:MSN4:KEX2:HSP70:WSC4:BCY1:PIR1:CAS5:C5_02110W_A:PCL1:C5_03560W_A:ALS9:RIM15:GPH1:PHO81	5979:46580:31939:30447:1932:48315:71361:70417:16239:71483:51666:10972:36281:44182:46827:7155:71470:23016:61409:61402:61403:34599:61395:60257:6616:6796:61186:160:70301:9405:61406:61405:70887:44416:9306:43710:42752:1900444:5991:61434:16540:6457:36168:51447:71432:7009:1905287:45792:16485:122:8104:5992:9408:2000219:6357:61401:32878:43709:51701:45762:61408:71406:97271:6338:6468:6612:1324:61422:34605:1…
9119	ribonucleoside metabolic process	16 out of 275 genes, 5.8%	103 out of 13081 background genes, 0.8%	0.00343	0	ISN1:GPM2:ADH2:ENO1:STF2:GPM1:CDC19:TDH3:TPI1:FBA1:PDC11:PFK1:PGK1:PFK2:PGI1:GLK1	6006:32889:30447:6002:48315:6567:6116:15810:19660:6190:6098:46835:1678:44416:6915:19655:6068:43458:6096:51701:6754:6559:7035:70072:7160:15976:51453:15886:44406:44409:42866:9267:36170:6569:947:71592:30448:61621:9117:51156:6013:55114:71216:6094:7163:949:51211:46323:36180:71590:30388:15992:72593
9123	nucleoside monophosphate metabolic process	15 out of 275 genes, 5.5%	93 out of 13081 background genes, 0.7%	0.00431	0	GPM2:ADH2:ENO1:STF2:GPM1:CDC19:TDH3:TPI1:FBA1:PDC11:PFK1:PGK1:PFK2:PGI1:GLK1	6006:32889:30447:6002:48315:6567:6116:15810:19660:6098:46835:1678:44416:6915:19655:6068:43458:6096:51701:6754:6559:7035:70072:7160:15976:51453:15886:44406:44409:42866:9267:36170:6569:947:30448:61621:51156:6013:55114:71216:6094:7163:949:51211:46323:36180:30388:15992:72593
90609	single-species submerged biofilm formation	18 out of 275 genes, 6.5%	130 out of 13081 background genes, 1.0%	0.00458	0	XOG1:CSH1:TYE7:ROB1:WH11:TPK2:DSE1:RHR2:TRY6:RBT5:CAS5:CAT2:MET4:ADH1:ALS9:NRG1:ALS3:ACE2	1410:45944:33215:30447:45991:31589:48315:71361:70417:32955:1900760:36281:1904541:1900441:44182:6071:7155:71470:6351:1900464:96:36177:16337:70301:6879:9405:70879:433:70887:9372:1903759:44416:43710:1900231:902:42149:42752:1900444:45827:6950:45333:60196:7186:36164:43708:46685:83:10737:45821:122:1403:6357:72353:6878:71456:43936:36178:1900439:9437:1900445:51701:43709:10969:97316:6084:6338:6468:34605:1…
51186	cofactor metabolic process	21 out of 275 genes, 7.6%	170 out of 13081 background genes, 1.3%	0.00473	0	GPM2:ADH2:ENO1:OSM2:MET1:GPM1:CDC19:C2_08100W_A:ACS1:TDH3:TPI1:FBA1:CAT2:PDC11:PFK1:PGK1:C6_02030C_A:LAT1:PFK2:PGI1:GLK1	6006:32889:30447:6002:48315:6567:6116:15810:19660:34975:6098:46835:1678:44416:6086:6915:6085:45333:19655:19354:2000377:43065:6068:43458:6096:9437:51701:6084:6559:7035:70072:7160:15976:51453:15886:44406:44409:42866:9267:44011:16573:19427:36170:6569:947:42867:46496:30448:6635:61621:51156:6013:46443:55114:71216:6094:45733:7163:304:19654:949:51211:46323:36180:30388:9086:15992:72593:35690
52200	response to host defenses	10 out of 275 genes, 3.6%	42 out of 13081 background genes, 0.3%	0.00495	0	ENO1:KEX2:HSP70:SOD4:CDC19:TDH3:TPI1:FBA1:ADH1:PGK1	6006:32889:30447:15810:71470:71451:6616:9405:6801:44416:6915:16540:6457:36168:71432:16485:6096:51701:34605:7160:15976:15886:7323:44406:44409:42866:52559:9267:44011:9636:36170:90472:44407:30260:61621:44114:71852:55114:71216:6094:36180:52059:72593
75136	response to host	10 out of 275 genes, 3.6%	42 out of 13081 background genes, 0.3%	0.00495	0	ENO1:KEX2:HSP70:SOD4:CDC19:TDH3:TPI1:FBA1:ADH1:PGK1	6006:32889:30447:15810:71470:71451:6616:9405:6801:44416:6915:16540:6457:36168:71432:16485:6096:51701:34605:7160:15976:15886:7323:44406:44409:42866:52559:9267:44011:9636:36170:90472:44407:30260:61621:44114:71852:55114:71216:6094:36180:52059:72593
9117	nucleotide metabolic process	20 out of 275 genes, 7.3%	157 out of 13081 background genes, 1.2%	0.00499	0	ISN1:GPM2:ADH2:ENO1:OSM2:STF2:GPM1:CDC19:C2_08100W_A:TDH3:TPI1:FBA1:PDC11:URA4:PFK1:PGK1:C6_02030C_A:PFK2:PGI1:GLK1	6006:32889:30447:6002:48315:6567:6116:15810:19660:34975:6190:6098:46835:1678:44416:6221:6915:19655:2000377:43065:6068:43458:6096:51701:6754:6559:7035:70072:7160:15976:51453:15886:44406:44409:42866:9267:36170:6569:947:71592:46496:30448:61621:9117:51156:6013:46443:6207:55114:71216:6094:7163:304:949:51211:46323:36180:71590:30388:15992:72593
90605	submerged biofilm formation	18 out of 275 genes, 6.5%	133 out of 13081 background genes, 1.0%	0.00636	0	XOG1:CSH1:TYE7:ROB1:WH11:TPK2:DSE1:RHR2:TRY6:RBT5:CAS5:CAT2:MET4:ADH1:ALS9:NRG1:ALS3:ACE2	1410:45944:33215:30447:45991:31589:48315:71361:70417:32955:1900760:36281:1904541:1900441:44182:6071:7155:71470:6351:1900464:96:36177:16337:70301:6879:9405:70879:433:70887:9372:1903759:44416:43710:1900231:902:42149:42752:1900444:45827:6950:45333:60196:7186:36164:43708:46685:83:10737:45821:122:1403:6357:72353:6878:71456:43936:36178:1900439:9437:1900445:51701:43709:10969:97316:6084:6338:6468:34605:1…
9150	purine ribonucleotide metabolic process	15 out of 275 genes, 5.5%	97 out of 13081 background genes, 0.7%	0.00738	0	GPM2:ADH2:ENO1:STF2:GPM1:CDC19:TDH3:TPI1:FBA1:PDC11:PFK1:PGK1:PFK2:PGI1:GLK1	6006:32889:30447:6002:48315:6567:6116:15810:19660:6098:46835:1678:44416:6915:19655:6068:43458:6096:51701:6754:6559:7035:70072:7160:15976:51453:15886:44406:44409:42866:9267:36170:6569:947:30448:61621:51156:6013:55114:71216:6094:7163:949:51211:46323:36180:30388:15992:72593
6163	purine nucleotide metabolic process	15 out of 275 genes, 5.5%	98 out of 13081 background genes, 0.7%	0.0084	0	GPM2:ADH2:ENO1:STF2:GPM1:CDC19:TDH3:TPI1:FBA1:PDC11:PFK1:PGK1:PFK2:PGI1:GLK1	6006:32889:30447:6002:48315:6567:6116:15810:19660:6098:46835:1678:44416:6915:19655:6068:43458:6096:51701:6754:6559:7035:70072:7160:15976:51453:15886:44406:44409:42866:9267:36170:6569:947:30448:61621:51156:6013:55114:71216:6094:7163:949:51211:46323:36180:30388:15992:72593
9116	nucleoside metabolic process	16 out of 275 genes, 5.8%	111 out of 13081 background genes, 0.8%	0.00928	0	ISN1:GPM2:ADH2:ENO1:STF2:GPM1:CDC19:TDH3:TPI1:FBA1:PDC11:PFK1:PGK1:PFK2:PGI1:GLK1	6006:32889:30447:6002:48315:6567:6116:15810:19660:6190:6098:46835:1678:44416:6915:19655:6068:43458:6096:51701:6754:6559:7035:70072:7160:15976:51453:15886:44406:44409:42866:9267:36170:6569:947:71592:30448:61621:9117:51156:6013:55114:71216:6094:7163:949:51211:46323:36180:71590:30388:15992:72593
43207	response to external biotic stimulus	10 out of 275 genes, 3.6%	45 out of 13081 background genes, 0.3%	0.00963	0	ENO1:KEX2:HSP70:SOD4:CDC19:TDH3:TPI1:FBA1:ADH1:PGK1	6006:32889:30447:15810:71470:71451:6616:9405:6801:44416:6915:16540:6457:36168:71432:16485:6096:51701:34605:7160:15976:15886:7323:44406:44409:42866:52559:9267:44011:9636:36170:90472:44407:30260:61621:44114:71852:55114:71216:6094:36180:52059:72593
51707	response to other organism	10 out of 275 genes, 3.6%	45 out of 13081 background genes, 0.3%	0.00963	0	ENO1:KEX2:HSP70:SOD4:CDC19:TDH3:TPI1:FBA1:ADH1:PGK1	6006:32889:30447:15810:71470:71451:6616:9405:6801:44416:6915:16540:6457:36168:71432:16485:6096:51701:34605:7160:15976:15886:7323:44406:44409:42866:52559:9267:44011:9636:36170:90472:44407:30260:61621:44114:71852:55114:71216:6094:36180:52059:72593
52173	response to defenses of other organism involved in symbiotic interaction	10 out of 275 genes, 3.6%	45 out of 13081 background genes, 0.3%	0.00963	0	ENO1:KEX2:HSP70:SOD4:CDC19:TDH3:TPI1:FBA1:ADH1:PGK1	6006:32889:30447:15810:71470:71451:6616:9405:6801:44416:6915:16540:6457:36168:71432:16485:6096:51701:34605:7160:15976:15886:7323:44406:44409:42866:52559:9267:44011:9636:36170:90472:44407:30260:61621:44114:71852:55114:71216:6094:36180:52059:72593
6094	gluconeogenesis	5 out of 275 genes, 1.8%	9 out of 13081 background genes, 0.1%	0.01189	0	ENO1:GPM1:FBA1:PGK1:PGI1	32889:30447:48315:15810:6098:44416:6096:51701:15976:44409:30448:71216:6094:7163:51211:36180
34599	cellular response to oxidative stress	17 out of 275 genes, 6.2%	127 out of 13081 background genes, 1.0%	0.01341	0	C1_01300W_A:TPS2:CAT1:MSN4:GAD1:SOD4:TPK2:DDR48:CMK1:CDR1:AHP1:C5_02110W_A:ALS9:SOD3:RIM15:PRX1:PST3	30447:6281:48315:71361:71483:1900760:10972:36281:7155:71470:71451:23016:61409:61402:61403:30466:34599:61395:60257:45332:42542:160:70301:9405:61406:61405:36129:1903759:6801:45117:15903:43710:1900231:1315:902:42752:6855:61434:7186:6538:98869:36164:7009:10737:1905287:45792:5992:1403:6810:72353:61401:43936:1900445:43709:51701:61408:71406:45454:6338:6468:1324:61422:34605:1900436:46686:9847:42744:32515…
9259	ribonucleotide metabolic process	15 out of 275 genes, 5.5%	103 out of 13081 background genes, 0.8%	0.01562	0	GPM2:ADH2:ENO1:STF2:GPM1:CDC19:TDH3:TPI1:FBA1:PDC11:PFK1:PGK1:PFK2:PGI1:GLK1	6006:32889:30447:6002:48315:6567:6116:15810:19660:6098:46835:1678:44416:6915:19655:6068:43458:6096:51701:6754:6559:7035:70072:7160:15976:51453:15886:44406:44409:42866:9267:36170:6569:947:30448:61621:51156:6013:55114:71216:6094:7163:949:51211:46323:36180:30388:15992:72593
44409	entry into host	6 out of 275 genes, 2.2%	15 out of 13081 background genes, 0.1%	0.01585	0	RIM8:ENO1:HSP70:TPK2:RHR2:ALS3	32889:33215:30447:48315:1900760:44182:6071:7155:71470:6616:36177:16337:9405:1903759:44416:43710:1900231:902:42752:6457:7186:36164:43708:1900198:10737:16485:1403:72353:6878:6096:43936:1900445:43709:51701:6468:71467:34605:6114:1900436:15976:9847:44406:33554:44409:5993:9267:44011:9636:70787:10515:45014:36170:30260:30448:44114:71216:6094:31505:1900430:36180:909:7265:7126:6897:42318
51828	entry into other organism involved in symbiotic interaction	6 out of 275 genes, 2.2%	15 out of 13081 background genes, 0.1%	0.01585	0	RIM8:ENO1:HSP70:TPK2:RHR2:ALS3	32889:33215:30447:48315:1900760:44182:6071:7155:71470:6616:36177:16337:9405:1903759:44416:43710:1900231:902:42752:6457:7186:36164:43708:1900198:10737:16485:1403:72353:6878:6096:43936:1900445:43709:51701:6468:71467:34605:6114:1900436:15976:9847:44406:33554:44409:5993:9267:44011:9636:70787:10515:45014:36170:30260:30448:44114:71216:6094:31505:1900430:36180:909:7265:7126:6897:42318
1901657	glycosyl compound metabolic process	16 out of 275 genes, 5.8%	116 out of 13081 background genes, 0.9%	0.01645	0	ISN1:GPM2:ADH2:ENO1:STF2:GPM1:CDC19:TDH3:TPI1:FBA1:PDC11:PFK1:PGK1:PFK2:PGI1:GLK1	6006:32889:30447:6002:48315:6567:6116:15810:19660:6190:6098:46835:1678:44416:6915:19655:6068:43458:6096:51701:6754:6559:7035:70072:7160:15976:51453:15886:44406:44409:42866:9267:36170:6569:947:71592:30448:61621:9117:51156:6013:55114:71216:6094:7163:949:51211:46323:36180:71590:30388:15992:72593
19637	organophosphate metabolic process	29 out of 275 genes, 10.5%	307 out of 13081 background genes, 2.3%	0.01732	0	ISN1:PDR16:GPM2:ADH2:ENO1:C1_10460W_A:OSM2:STF2:PLB4.5:GPM1:CDC19:RNR22:C2_08100W_A:TDH3:TPI1:FBA1:C4_02420C_A:PDC11:URA4:GDE1:PFK1:PGK1:PLB1:C6_02030C_A:C6_02420W_A:PFK2:PHO112:PGI1:GLK1	6006:32889:30447:6002:48315:16126:6567:9186:6116:15914:15810:43942:19660:34975:6071:6190:6098:46835:1678:9405:44416:44001:46434:6221:6915:36164:19655:2000377:43065:6506:6068:43458:6096:51701:6754:6559:7035:70072:7160:15976:51453:15886:44406:44409:42866:9267:8654:36170:6569:947:71592:46496:30448:34478:61621:9117:51156:6013:46443:9395:6207:55114:71216:6094:7163:6656:304:949:51211:46323:36180:71590:…
43709	cell adhesion involved in single-species biofilm formation	7 out of 275 genes, 2.5%	22 out of 13081 background genes, 0.2%	0.01736	0	TPK2:DSE1:RBT5:ALS9:NRG1:ALS3:ACE2	1410:45944:33215:30447:48315:71361:32955:1900760:36281:1900441:44182:7155:1900464:36177:16337:70301:6879:9405:433:70887:9372:1903759:43710:1900231:902:42149:42752:1900444:45827:60196:7186:36164:43708:83:10737:122:1403:72353:6878:43936:36178:1900439:1900445:43709:10969:97316:6468:34605:1900436:1900189:45892:36244:9847:44406:33554:44409:10811:6355:5993:9267:44011:70787:10515:36171:45014:36170:44407…
6979	response to oxidative stress	18 out of 275 genes, 6.5%	143 out of 13081 background genes, 1.1%	0.01771	0	C1_01300W_A:TPS2:CAT1:MSN4:GAD1:SOD4:TPK2:C2_08100W_A:DDR48:CMK1:CDR1:AHP1:C5_02110W_A:ALS9:SOD3:RIM15:PRX1:PST3	30447:6281:48315:71361:6116:71483:1900760:10972:36281:7155:71470:71451:23016:61409:61402:61403:30466:34599:61395:60257:45332:42542:160:70301:9405:61406:61405:36129:1903759:6801:45117:15903:43710:1900231:1315:902:42752:6855:61434:7186:6538:98869:36164:7009:10737:2000377:43065:1905287:45792:5992:1403:6810:72353:61401:43936:1900445:43709:51701:61408:71406:45454:6338:6468:1324:61422:34605:1900436:466…
72521	purine-containing compound metabolic process	16 out of 275 genes, 5.8%	118 out of 13081 background genes, 0.9%	0.02048	0	ISN1:GPM2:ADH2:ENO1:STF2:GPM1:CDC19:TDH3:TPI1:FBA1:PDC11:PFK1:PGK1:PFK2:PGI1:GLK1	6006:32889:30447:6002:48315:6567:6116:15810:19660:6190:6098:46835:1678:44416:6915:19655:6068:43458:6096:51701:6754:6559:7035:70072:7160:15976:51453:15886:44406:44409:42866:9267:36170:6569:947:71592:30448:61621:9117:51156:6013:55114:71216:6094:7163:949:51211:46323:36180:71590:30388:15992:72593
55086	nucleobase-containing small molecule metabolic process	21 out of 275 genes, 7.6%	187 out of 13081 background genes, 1.4%	0.0211	0	ISN1:GPM2:ADH2:ENO1:OSM2:STF2:GPM1:CDC19:RNR22:C2_08100W_A:TDH3:TPI1:FBA1:PDC11:URA4:PFK1:PGK1:C6_02030C_A:PFK2:PGI1:GLK1	6006:32889:30447:6002:48315:6567:9186:6116:15810:19660:34975:6190:6098:46835:1678:44416:6221:6915:19655:2000377:43065:6068:43458:6096:51701:6754:6559:7035:70072:7160:15976:51453:15886:44406:44409:42866:9267:36170:6569:947:71592:46496:30448:61621:9117:51156:6013:46443:6207:55114:71216:6094:7163:304:949:51211:46323:36180:71590:30388:15992:72593
19319	hexose biosynthetic process	5 out of 275 genes, 1.8%	10 out of 13081 background genes, 0.1%	0.02299	0	ENO1:GPM1:FBA1:PGK1:PGI1	32889:30447:48315:15810:6098:44416:6096:51701:15976:44409:30448:71216:6094:7163:51211:36180
46364	monosaccharide biosynthetic process	5 out of 275 genes, 1.8%	10 out of 13081 background genes, 0.1%	0.02299	0	ENO1:GPM1:FBA1:PGK1:PGI1	32889:30447:48315:15810:6098:44416:6096:51701:15976:44409:30448:71216:6094:7163:51211:36180
44281	small molecule metabolic process	47 out of 275 genes, 17.1%	630 out of 13081 background genes, 4.8%	0.02638	0	RIM8:ISN1:GPM2:ERG3:PEX3:ADH2:ENO1:DAK2:PHO84:GAD1:OSM2:STF2:MET1:ALD5:GPM1:CDC19:RNR22:C2_08100W_A:ARA1:ACS1:C3_00170C_A:RHR2:FOX2:C3_03680W_A:C3_06280W_A:TDH3:TPI1:CAR2:FBA1:CAT2:VTC4:MET4:SOU1:PDC11:URA4:CAR1:GDE1:PFK1:PGK1:C6_02030C_A:C6_02420W_A:LAT1:PFK2:POT1:VTC3:PGI1:GLK1	16237:32581:6006:32889:45944:30447:6002:48315:6567:9186:6116:97080:15810:90368:19660:44182:34975:6071:71470:48016:6190:34599:6098:96:36177:97237:46835:1678:9405:6631:2000769:44416:19722:9062:19413:6665:6086:6221:6915:6085:19752:45333:6538:36164:46685:19655:6828:6817:1900198:19354:2000377:1904728:43065:6097:16485:8104:1403:6068:6797:6357:43458:6096:45046:9437:51701:44262:42760:6084:6754:6559:7035:…
44764	multi-organism cellular process	24 out of 275 genes, 8.7%	239 out of 13081 background genes, 1.8%	0.03558	0	XOG1:ENG1:CSH1:KEX2:TYE7:ROB1:C1_14060W_A:WH11:TPK2:YVC1:DSE1:YWP1:RHR2:TRY6:RBT5:CAS5:CAT2:MET4:ADH1:ALS9:NRG1:QDR1:ALS3:ACE2	1410:45944:33215:30447:45991:31589:48315:71361:42710:70417:32955:55088:1900760:36281:1904541:1900441:44182:6071:7155:71470:6351:1900464:96:36177:16337:70301:6879:9405:70879:44010:433:70887:9372:1903759:44416:43710:1900231:902:42149:42752:1900444:6855:45827:6950:16540:45333:60196:36168:7186:36164:43708:71432:46685:83:10737:45821:16485:122:1403:6357:72353:6878:71456:43936:36178:1900439:9437:1900445…
19752	carboxylic acid metabolic process	31 out of 275 genes, 11.3%	355 out of 13081 background genes, 2.7%	0.04147	0.0002	RIM8:GPM2:ERG3:PEX3:ADH2:ENO1:GAD1:MET1:ALD5:GPM1:CDC19:ARA1:ACS1:FOX2:C3_03680W_A:C3_06280W_A:TDH3:TPI1:CAR2:FBA1:CAT2:MET4:PDC11:CAR1:PFK1:PGK1:LAT1:PFK2:POT1:PGI1:GLK1	32581:6006:32889:45944:30447:6002:48315:6567:6116:15810:90368:19660:44182:34599:6098:96:36177:46835:1678:9405:6631:44416:19722:9062:19413:6665:6086:6915:6085:19752:45333:6538:46685:19655:1900198:19354:6097:16485:1403:6068:6357:43458:6096:45046:9437:51701:44262:42760:6084:6559:7035:70072:71467:7160:15976:51453:1900189:46686:15886:44406:44409:6696:10811:42866:9267:44011:16573:19547:19427:36170:6569…
9408	response to heat	14 out of 275 genes, 5.1%	99 out of 13081 background genes, 0.8%	0.04211	0.0002	TPS2:PIL1:MSN4:KEX2:HSP70:WSC4:BCY1:C5_02110W_A:PCL1:C5_03560W_A:ALS9:RIM15:GPH1:PHO81	5979:46580:31939:30447:1932:48315:71361:16239:71483:51666:10972:36281:44182:46827:7155:71470:23016:61409:61402:61403:34599:61395:60257:6616:6796:61186:160:70301:9405:61406:61405:70887:44416:9306:43710:42752:1900444:5991:61434:16540:6457:36168:51447:71432:7009:1905287:45792:16485:8104:5992:9408:2000219:61401:32878:43709:51701:45762:61408:71406:97271:6338:6468:6612:1324:61422:34605:1900432:7323:325…
43708	cell adhesion involved in biofilm formation	7 out of 275 genes, 2.5%	25 out of 13081 background genes, 0.2%	0.04403	0.0002	TPK2:DSE1:RBT5:ALS9:NRG1:ALS3:ACE2	1410:45944:33215:30447:48315:71361:32955:1900760:36281:1900441:44182:7155:1900464:36177:16337:70301:6879:9405:433:70887:9372:1903759:43710:1900231:902:42149:42752:1900444:45827:60196:7186:36164:43708:83:10737:122:1403:72353:6878:43936:36178:1900439:1900445:43709:10969:97316:6468:34605:1900436:1900189:45892:36244:9847:44406:33554:44409:10811:6355:5993:9267:44011:70787:10515:36171:45014:36170:44407…
51716	cellular response to stimulus	75 out of 275 genes, 27.3%	1207 out of 13081 background genes, 9.2%	0.05542	0.0002	RIM8:C1_01300W_A:ROA1:TPS2:PDR16:HHT21:SYG1:ERG3:CAT1:ATC1:ENO1:MSN4:KEX2:DAK2:SWE1:FGR41:HAP43:GIN4:GAD1:TYE7:HSP70:ROB1:FTR1:SOD4:HGT7:BCY1:MET1:ADAEC:CDC19:DBF2:TPK2:SIT1:RAD57:DSE1:STB3:DDR48:FGR29:GAL4:ASH1:C3_00170C_A:RHR2:C3_01910C_A:C3_03680W_A:CMK1:CDR1:FCR1:SLK19:TPI1:SEC61:CAR2:CAS5:PGA62:AHP1:VTC4:MSH2:CCN1:HSP12:C5_02110W_A:PCL1:C5_03560W_A:GDE1:FET34:FET31:ALS9:SOD3:RIM15:RNH35:IQG1…	16237:90154:6974:1410:32889:5979:45944:15891:33215:46580:921:31939:30447:30491:1932:45991:6281:48315:16126:32463:71361:70417:16239:722:71483:32955:15914:15031:1900760:51666:8361:6827:10972:32187:70843:36176:36281:43942:6749:1900441:15758:1990539:6334:44182:46827:6071:7155:320:71470:71451:23016:61409:61402:48016:6351:61403:1900464:30466:6812:34599:8643:1558:10697:61395:60257:1903477:6616:6796:3617…
16051	carbohydrate biosynthetic process	11 out of 275 genes, 4.0%	67 out of 13081 background genes, 0.5%	0.07072	0.0004	C1_01360C_A:TPS2:ENO1:GPM1:TPS3:RHR2:FBA1:GDB1:PGK1:GSY1:PGI1	32889:30447:48315:15810:6071:71470:34599:60257:6098:9405:44416:5978:36164:5992:6096:51701:34605:6114:15976:44409:9267:44011:5980:36170:30448:71216:6094:7163:31505:51211:36180
19693	ribose phosphate metabolic process	15 out of 275 genes, 5.5%	118 out of 13081 background genes, 0.9%	0.07979	0.0004	GPM2:ADH2:ENO1:STF2:GPM1:CDC19:TDH3:TPI1:FBA1:PDC11:PFK1:PGK1:PFK2:PGI1:GLK1	6006:32889:30447:6002:48315:6567:6116:15810:19660:6098:46835:1678:44416:6915:19655:6068:43458:6096:51701:6754:6559:7035:70072:7160:15976:51453:15886:44406:44409:42866:9267:36170:6569:947:30448:61621:51156:6013:55114:71216:6094:7163:949:51211:46323:36180:30388:15992:72593
44011	single-species biofilm formation on inanimate substrate	15 out of 275 genes, 5.5%	118 out of 13081 background genes, 0.9%	0.07979	0.0004	XOG1:CSH1:TYE7:ROB1:WH11:TPK2:DSE1:RHR2:TRY6:RBT5:CAS5:CAT2:MET4:ADH1:ALS3	45944:33215:30447:45991:31589:48315:70417:1900760:1904541:44182:6071:7155:71470:6351:96:16337:6879:9405:70879:1903759:44416:43710:1900231:902:42149:42752:6950:45333:7186:36164:43708:46685:10737:45821:122:1403:6357:72353:6878:71456:43936:9437:1900445:51701:43709:10969:6084:6338:6468:10895:61393:6073:6114:1900436:15976:7160:1900189:46686:9847:36166:44406:71474:33554:44409:10811:6355:5993:9267:44011…
51703	intraspecies interaction between organisms	15 out of 275 genes, 5.5%	118 out of 13081 background genes, 0.9%	0.07979	0.0004	XOG1:CSH1:TYE7:ROB1:WH11:TPK2:DSE1:RHR2:TRY6:RBT5:CAS5:CAT2:MET4:ADH1:ALS3	45944:33215:30447:45991:31589:48315:70417:1900760:1904541:44182:6071:7155:71470:6351:96:16337:6879:9405:70879:1903759:44416:43710:1900231:902:42149:42752:6950:45333:7186:36164:43708:46685:10737:45821:122:1403:6357:72353:6878:71456:43936:9437:1900445:51701:43709:10969:6084:6338:6468:10895:61393:6073:6114:1900436:15976:7160:1900189:46686:9847:36166:44406:71474:33554:44409:10811:6355:5993:9267:44011…
302	response to reactive oxygen species	8 out of 275 genes, 2.9%	37 out of 13081 background genes, 0.3%	0.09432	0.0004	C1_01300W_A:CAT1:MSN4:SOD4:TPK2:C2_08100W_A:ALS9:SOD3	30447:48315:71361:6116:71483:1900760:36281:7155:71451:61409:61402:61403:61395:42542:70301:9405:61406:61405:36129:1903759:6801:43710:1900231:1315:902:42752:61434:7186:98869:36164:10737:2000377:43065:1403:72353:61401:43936:1900445:43709:51701:61408:71406:45454:6338:6468:1324:61422:34605:1900436:9847:42744:33554:44409:6355:5993:9267:44011:70787:10515:45014:36171:36170:61412:30448:44114:61407:71216:5…

## Sheet: 4. GO component - UP genes
GO components of all genes with increased RNA PolII occupancy in the cas5∆/cas5∆ mutant in comparison to the wild type strain under basal condition.
GOID	GO term	Cluster frequency	Background frequency	Corrected P-value	False discovery rate	Gene(s) annotated to the term	Directly Annotated GOID List
30684	preribosome	37 out of 329 genes, 11.2%	169 out of 13081 background genes, 1.3%	1.4e-16	0	C1_02450C_A:NOP4:REI1:YTM1:C1_11000C_A:NEP1:CHR1:C2_05160C_A:RPF2:MAK16:C2_09660W_A:BUD21:C3_02040C_A:HBR3:C3_04380C_A:C3_04510W_A:C3_06760W_A:HCA4:RPF1:C4_05330C_A:HAS1:NOP5:NIP7:MRT4:NOG2:RPL28:CR_03360W_A:CR_04170W_A:NOC2:NMD3:CR_07030C_A:CR_07080W_A:TSR1:SIK1:UTP5:CR_10410C_A:CR_10470C_A	5737:5829:33553:5654:5840:32040:5739:70545:5635:30687:5880:15934:31429:30688:72686:31428:30685:16020:5730:22625:5634:30691:46540:30686:34455:34399:30690
30687	preribosome, large subunit precursor	22 out of 329 genes, 6.7%	78 out of 13081 background genes, 0.6%	8.39e-12	0	C1_02450C_A:NOP4:REI1:YTM1:C1_11000C_A:C2_05160C_A:RPF2:MAK16:C2_09660W_A:C3_02040C_A:C3_04510W_A:C3_06760W_A:RPF1:HAS1:NIP7:MRT4:NOG2:RPL28:CR_04170W_A:NOC2:NMD3:CR_07080W_A	5737:5829:5654:5840:5739:70545:5635:30687:15934:31429:30688:31428:5730:5634:22625:30691:30686:30690
5746	mitochondrial respiratory chain	13 out of 329 genes, 4.0%	42 out of 13081 background genes, 0.3%	4.25e-07	0	C1_00700W_A:C1_06050C_A:COX5:C2_00400C_A:COX6:NDH51:CYT1:C3_04080W_A:RIP1:FESUR1:QCR9:C5_05230C_A:SDH2	9986:5758:5747:42652:329:5759:5886:5750:5749:16020:5751:30445:34399
1990204	oxidoreductase complex	14 out of 329 genes, 4.3%	50 out of 13081 background genes, 0.4%	4.42e-07	0	C1_00700W_A:C1_06050C_A:IDH1:GCV3:C2_00400C_A:NDH51:CYT1:C3_04080W_A:RIP1:FESUR1:QCR9:C5_02190C_A:C5_05230C_A:SDH2	9986:5758:5739:42645:5747:42652:329:5759:5886:5750:5960:5749:16020:5962:30445:34399:9353:5761
70469	respiratory chain	13 out of 329 genes, 4.0%	43 out of 13081 background genes, 0.3%	5.9e-07	0	C1_00700W_A:C1_06050C_A:COX5:C2_00400C_A:COX6:NDH51:CYT1:C3_04080W_A:RIP1:FESUR1:QCR9:C5_05230C_A:SDH2	9986:5758:5747:42652:329:5759:5886:5750:5749:16020:5751:30445:34399
98803	respiratory chain complex	13 out of 329 genes, 4.0%	43 out of 13081 background genes, 0.3%	5.9e-07	0	C1_00700W_A:C1_06050C_A:COX5:C2_00400C_A:COX6:NDH51:CYT1:C3_04080W_A:RIP1:FESUR1:QCR9:C5_05230C_A:SDH2	9986:5758:5747:42652:329:5759:5886:5750:5749:16020:5751:30445:34399
98800	inner mitochondrial membrane protein complex	17 out of 329 genes, 5.2%	93 out of 13081 background genes, 0.7%	9.44e-06	0	C1_00700W_A:C1_06050C_A:COX5:PAM16:C2_00400C_A:ATP18:COX6:NDH51:CYT1:C3_04080W_A:RIP1:FESUR1:QCR9:C5_05230C_A:TIM9:MGE1:SDH2	1405:9986:5829:276:5758:5739:5747:42652:329:5759:5886:5750:5749:42719:16020:5634:5751:30445:42721:34399
98798	mitochondrial protein complex	19 out of 329 genes, 5.8%	123 out of 13081 background genes, 0.9%	2.56e-05	0	C1_00700W_A:C1_06050C_A:COX5:IDH1:PAM16:C2_00400C_A:ATP18:COX6:NDH51:CYT1:C3_04080W_A:RIP1:FESUR1:QCR9:C5_02190C_A:C5_05230C_A:TIM9:MGE1:SDH2	1405:9986:5829:276:5758:5739:42645:5747:42652:329:5759:5886:5750:5749:42719:16020:5634:5962:5751:30445:42721:34399:9353:5761
1990904	ribonucleoprotein complex	55 out of 329 genes, 16.7%	732 out of 13081 background genes, 5.6%	6.59e-05	0	HBR1:C1_02450C_A:C1_03620C_A:SSA2:NOP4:REI1:YTM1:C1_11000C_A:NEP1:CHR1:C2_03950W_A:C2_05160C_A:RPF2:C2_05300C_A:MAK16:C2_09660W_A:C2_10810W_A:BUD21:C3_02040C_A:HBR3:C3_04380C_A:C3_04510W_A:CAM1:C3_06760W_A:HCA4:RPF1:EFB1:C4_05330C_A:C4_06850C_A:C5_02190C_A:HAS1:NOP5:C6_02230W_A:NIP7:C6_02380W_A:MRT4:NOG2:LSM6:CR_00490W_A:RPL28:CR_03360W_A:CR_04170W_A:NHP2:NOC2:NMD3:CR_07030C_A:CR_07080W_A:RPP2A:T…	5763:5655:9986:33553:5654:32040:31966:5732:5762:329:5759:5886:30687:15934:5880:31429:5844:72686:5688:30685:22625:30691:46540:243:172:30686:71004:34455:5832:9353:30446:5761:5737:5829:5840:5739:974:5682:932:70545:5635:5685:97311:1990726:71014:9277:30688:31428:5730:16020:5634:22626:43332:10494:34399:30690:5576:5853
30529	intracellular ribonucleoprotein complex	55 out of 329 genes, 16.7%	732 out of 13081 background genes, 5.6%	6.59e-05	0	HBR1:C1_02450C_A:C1_03620C_A:SSA2:NOP4:REI1:YTM1:C1_11000C_A:NEP1:CHR1:C2_03950W_A:C2_05160C_A:RPF2:C2_05300C_A:MAK16:C2_09660W_A:C2_10810W_A:BUD21:C3_02040C_A:HBR3:C3_04380C_A:C3_04510W_A:CAM1:C3_06760W_A:HCA4:RPF1:EFB1:C4_05330C_A:C4_06850C_A:C5_02190C_A:HAS1:NOP5:C6_02230W_A:NIP7:C6_02380W_A:MRT4:NOG2:LSM6:CR_00490W_A:RPL28:CR_03360W_A:CR_04170W_A:NHP2:NOC2:NMD3:CR_07030C_A:CR_07080W_A:RPP2A:T…	5763:5655:9986:33553:5654:32040:31966:5732:5762:329:5759:5886:30687:15934:5880:31429:5844:72686:5688:30685:22625:30691:46540:243:172:30686:71004:34455:5832:9353:30446:5761:5737:5829:5840:5739:974:5682:932:70545:5635:5685:97311:1990726:71014:30688:9277:31428:16020:5730:5634:22626:43332:34399:10494:30690:5576:5853
5739	mitochondrion	85 out of 329 genes, 25.8%	1356 out of 13081 background genes, 10.4%	8.51e-05	0	LEU4:C1_00700W_A:MGM101:SSA2:C1_05180C_A:C1_05190C_A:C1_06050C_A:MMD1:YMC1:C1_07630W_A:GCV2:C1_08820C_A:COX5:PPT2:IDH1:C1_10140C_A:GCV3:C1_14090W_A:PAM16:C1_14320C_A:C2_00400C_A:C2_00600C_A:ATP18:REX2:ARO3:COX6:RAD32:C2_03950W_A:BAT21:NDH51:CYT1:AAT1:C2_05300C_A:C2_05480C_A:C2_07550W_A:C2_09500W_A:C3_00840C_A:ALI1:C3_01610W_A:C3_01680C_A:ILV2:NUO2:AIP2:C3_04080W_A:RIP1:FESUR1:FUM12:C4_00880W_A:LA…	45239:5763:276:9986:31518:42645:5948:324:31966:51286:9514:5762:16021:329:30687:5759:5750:5886:5844:42719:22625:32153:30691:35861:5962:30445:5832:9353:30446:5761:5737:1405:5829:5758:5739:262:30479:5747:42652:214:97311:5743:5960:5657:9277:31305:5730:5749:5637:16020:5634:5751:42721:34399:30690:5576:5741:5885
5730	nucleolus	41 out of 329 genes, 12.5%	485 out of 13081 background genes, 3.7%	0.00012	0	C1_02450C_A:C1_03790C_A:NOP4:YTM1:RPA34:C1_11000C_A:NEP1:CHR1:C1_12680W_A:C2_05160C_A:RPF2:C2_05750W_A:MAK16:C2_09660W_A:BUD21:C3_02040C_A:C3_04380C_A:C3_04510W_A:C3_06760W_A:RPF1:C4_05330C_A:C4_05650W_A:HAS1:NOP5:NIP7:MRT4:NOG2:LSM6:CR_03360W_A:CR_04170W_A:NHP2:NOC2:CR_07030C_A:CR_07080W_A:TSR1:SIK1:UTP5:CR_10410C_A:CR_10470C_A:POP3:CSM1	5655:33553:5654:32040:33551:5732:30687:15934:5880:31429:72686:5688:30685:30691:46540:172:30686:34455:5737:5829:5840:5739:5736:932:70545:5635:1990726:30688:31428:16020:5730:34399:30690
1902495	transmembrane transporter complex	6 out of 329 genes, 1.8%	11 out of 13081 background genes, 0.1%	0.0002	0	C1_06050C_A:CYT1:C3_04080W_A:RIP1:QCR9:C5_05230C_A	5759:5886:5750:5758:34399
45275	respiratory chain complex III	6 out of 329 genes, 1.8%	11 out of 13081 background genes, 0.1%	0.0002	0	C1_06050C_A:CYT1:C3_04080W_A:RIP1:QCR9:C5_05230C_A	5759:5886:5750:5758:34399
5750	mitochondrial respiratory chain complex III	6 out of 329 genes, 1.8%	11 out of 13081 background genes, 0.1%	0.0002	0	C1_06050C_A:CYT1:C3_04080W_A:RIP1:QCR9:C5_05230C_A	5759:5886:5750:5758:34399
70069	cytochrome complex	8 out of 329 genes, 2.4%	23 out of 13081 background genes, 0.2%	0.00021	0	C1_06050C_A:COX5:COX6:CYT1:C3_04080W_A:RIP1:QCR9:C5_05230C_A	5759:5886:5750:5758:5751:34399
30686	90S preribosome	12 out of 329 genes, 3.6%	82 out of 13081 background genes, 0.6%	0.00969	0	YTM1:NEP1:CHR1:BUD21:HAS1:NOP5:NOC2:CR_07030C_A:TSR1:SIK1:CR_10410C_A:CR_10470C_A	32040:30687:5880:31429:30691:30686:5737:5829:5739:70545:5635:30688:31428:5730:34399:30690
44429	mitochondrial part	42 out of 329 genes, 12.8%	610 out of 13081 background genes, 4.7%	0.01552	0	C1_00700W_A:MGM101:C1_06050C_A:MMD1:C1_07630W_A:COX5:IDH1:C1_14090W_A:PAM16:C2_00400C_A:C2_00600C_A:ATP18:COX6:C2_03950W_A:BAT21:NDH51:CYT1:C2_05300C_A:C2_05480C_A:C3_01680C_A:AIP2:C3_04080W_A:RIP1:FESUR1:C4_00880W_A:SEN2:QCR9:C4_03730C_A:C5_02190C_A:YNK1:C5_05230C_A:C6_02380W_A:C7_01440W_A:TIM9:MAM33:CR_00490W_A:MGE1:MCI4:CR_02620C_A:SDH2:ACO1:CR_10280W_A	5763:9986:276:42645:31966:5762:329:5886:5759:5750:42719:5962:30445:9353:5761:1405:5829:5758:5739:262:5747:42652:214:97311:5743:31305:5749:16020:5634:5751:42721:34399:5741
32040	small-subunit processome	9 out of 329 genes, 2.7%	50 out of 13081 background genes, 0.4%	0.01674	0	NEP1:BUD21:C3_04380C_A:HCA4:NOP5:CR_03360W_A:SIK1:UTP5:CR_10470C_A	33553:32040:5880:72686:46540:30686:34455:5737:5829:31428:5730:5634:34399
44455	mitochondrial membrane part	18 out of 329 genes, 5.5%	176 out of 13081 background genes, 1.3%	0.01985	0	C1_00700W_A:C1_06050C_A:COX5:PAM16:C2_00400C_A:ATP18:COX6:NDH51:CYT1:C3_01680C_A:C3_04080W_A:RIP1:FESUR1:QCR9:C5_05230C_A:TIM9:MGE1:SDH2	9986:276:329:5759:5886:5750:42719:30445:1405:5829:5758:5739:5747:42652:31305:5749:16020:5634:5751:42721:34399
19866	organelle inner membrane	20 out of 329 genes, 6.1%	212 out of 13081 background genes, 1.6%	0.02544	0	C1_00700W_A:C1_06050C_A:COX5:PAM16:C2_00400C_A:ATP18:COX6:NDH51:CYT1:C3_01680C_A:C3_04080W_A:RIP1:FESUR1:QCR9:C5_05230C_A:TIM9:TRM1:MGE1:MCI4:SDH2	9986:276:329:5759:5886:5750:42719:30445:1405:5829:5758:5739:5747:42652:5743:31305:5749:5637:16020:5634:5751:42721:34399
5743	mitochondrial inner membrane	19 out of 329 genes, 5.8%	205 out of 13081 background genes, 1.6%	0.04718	0	C1_00700W_A:C1_06050C_A:COX5:PAM16:C2_00400C_A:ATP18:COX6:NDH51:CYT1:C3_01680C_A:C3_04080W_A:RIP1:FESUR1:QCR9:C5_05230C_A:TIM9:MGE1:MCI4:SDH2	9986:276:329:5759:5886:5750:42719:30445:1405:5829:5758:5739:5747:42652:5743:31305:5749:16020:5634:5751:42721:34399
1990351	transporter complex	7 out of 329 genes, 2.1%	36 out of 13081 background genes, 0.3%	0.06359	0.0026	C1_06050C_A:CYT1:C3_04080W_A:RIP1:QCR9:C5_05230C_A:TIM9	5759:5886:5750:42719:5829:5758:5634:42721:34399
5759	mitochondrial matrix	20 out of 329 genes, 6.1%	234 out of 13081 background genes, 1.8%	0.09484	0.0033	MGM101:MMD1:C1_07630W_A:IDH1:C1_14090W_A:C2_00600C_A:C2_03950W_A:BAT21:C2_05300C_A:AIP2:RIP1:C4_00880W_A:C4_03730C_A:C5_02190C_A:C6_02380W_A:C7_01440W_A:MAM33:CR_00490W_A:MGE1:ACO1	5763:9986:42645:31966:5762:5886:5750:5759:5962:9353:5761:1405:5829:262:97311:5634

## Sheet: 5. GO component - DOWN genes
GO components of all genes with decreased RNA PolII occupancy in the cas5∆/cas5∆ mutant in comparison to the wild type strain under basal condition.
GOID	GO term	Cluster frequency	Background frequency	Corrected P-value	False discovery rate	Gene(s) annotated to the term	Directly Annotated GOID List
5618	cell wall	38 out of 275 genes, 13.8%	165 out of 13081 background genes, 1.3%	9.51e-21	0	XOG1:ENG1:CSH1:GPM2:CAT1:ATC1:ENO1:PGA6:HSP70:SIM1:RBE1:SOD4:GPM1:WH11:CDC19:DSE1:YWP1:PIR1:DDR48:TOS1:TDH3:TPI1:RBT5:FBA1:PGA62:AHP1:PDC11:HSP12:C5_02110W_A:SCW11:ADH1:PGK1:EBP1:ALS9:GPH1:CSP37:ALS3:CHT3	9986:31160:324:9514:16021:5621:5886:5759:5811:5935:30445:30446:31307:5622:5737:5768:5829:5758:1990819:5739:5783:5782:5635:97311:30287:935:71014:9277:16020:5634:15:30428:31314:9897:34399:5576
9277	fungal-type cell wall	38 out of 275 genes, 13.8%	165 out of 13081 background genes, 1.3%	9.51e-21	0	XOG1:ENG1:CSH1:GPM2:CAT1:ATC1:ENO1:PGA6:HSP70:SIM1:RBE1:SOD4:GPM1:WH11:CDC19:DSE1:YWP1:PIR1:DDR48:TOS1:TDH3:TPI1:RBT5:FBA1:PGA62:AHP1:PDC11:HSP12:C5_02110W_A:SCW11:ADH1:PGK1:EBP1:ALS9:GPH1:CSP37:ALS3:CHT3	9986:31160:324:9514:16021:5621:5886:5759:5811:5935:30445:30446:31307:5737:5622:5768:5829:5758:1990819:5783:5739:5782:5635:97311:30287:935:71014:9277:16020:5634:15:30428:9897:31314:34399:5576
30312	external encapsulating structure	38 out of 275 genes, 13.8%	166 out of 13081 background genes, 1.3%	1.2e-20	0	XOG1:ENG1:CSH1:GPM2:CAT1:ATC1:ENO1:PGA6:HSP70:SIM1:RBE1:SOD4:GPM1:WH11:CDC19:DSE1:YWP1:PIR1:DDR48:TOS1:TDH3:TPI1:RBT5:FBA1:PGA62:AHP1:PDC11:HSP12:C5_02110W_A:SCW11:ADH1:PGK1:EBP1:ALS9:GPH1:CSP37:ALS3:CHT3	9986:31160:324:9514:16021:5621:5886:5759:5811:5935:30445:30446:31307:5737:5622:5768:5829:5758:1990819:5783:5739:5782:5635:97311:30287:935:71014:9277:16020:5634:15:30428:9897:31314:34399:5576
71944	cell periphery	83 out of 275 genes, 30.2%	871 out of 13081 background genes, 6.7%	1.82e-19	0	RIM8:C1_00310W_A:ROA1:XOG1:ENG1:PDR16:CSH1:GPM2:PIL1:SYG1:ERG3:CAT1:ATC1:C1_07440W_A:CDR4:ADH2:ENO1:C1_08610C_A:PGA6:C1_10460W_A:GIN4:PHO84:HSP70:SIM1:RBE1:FTR1:SOD4:HGT7:HGT8:HGT6:BCY1:C2_02410W_A:ZRT2:GPM1:WH11:CDC19:RTA3:GIT1:DBF2:FRP3:SIT1:DSE1:YWP1:PIR1:DDR48:C3_01540W_A:TOS1:C3_01910C_A:C3_03680W_A:CDR1:TDH3:SLK19:TPI1:SEC61:RBT5:FBA1:PGA62:AHP1:SUL2:VTC4:C4_05610C_A:PDC11:HSP12:C5_02110W_A…	9986:324:329:5816:5621:5759:5886:790:97042:5887:9898:44732:5952:31307:5737:5622:5940:142:31097:5840:33254:31310:5635:97311:935:71014:9277:31934:15:30428:31314:5784:45121:30176:33573:31160:9514:16021:5811:5935:97249:30445:30446:131:5768:5829:5758:34973:1990819:5739:5783:5794:97038:5782:71944:71341:32126:5788:30287:31305:16020:5730:5634:32541:9897:34399:5576:5741
9986	cell surface	39 out of 275 genes, 14.2%	207 out of 13081 background genes, 1.6%	5.62e-18	0	XOG1:ENG1:CSH1:PHO100:ENO1:PGA6:FGR41:HSP70:SIM1:RBE1:FTR1:SOD4:PLB4.5:GPM1:CDC19:SIT1:YWP1:PIR1:DDR48:TOS1:CDR1:TDH3:TPI1:RBT5:FBA1:PGA62:PGA38:PDC11:SCW11:ADH1:PGK1:EBP1:ALS9:GPH1:CSP37:PHO113:PHO112:ALS3:CHT3	9986:324:5621:5886:5887:31307:5737:5622:5635:97311:935:71014:9277:15:30428:31314:45121:33573:9514:16021:5811:5935:30445:30446:5768:5829:5758:1990819:5783:5739:5794:71944:30287:16020:5634:9897:34399:5576
30446	hyphal cell wall	24 out of 275 genes, 8.7%	69 out of 13081 background genes, 0.5%	3.25e-17	0	CSH1:ENO1:HSP70:SOD4:GPM1:WH11:CDC19:YWP1:DDR48:TOS1:TDH3:TPI1:FBA1:PGA62:AHP1:PDC11:HSP12:C5_02110W_A:ADH1:PGK1:EBP1:GPH1:CSP37:ALS3	9986:324:5886:31307:5737:5622:97311:71014:9277:15:9514:16021:5811:30445:30446:5768:5829:5758:5783:5739:16020:5634:9897:5576
5576	extracellular region	35 out of 275 genes, 12.7%	233 out of 13081 background genes, 1.8%	8.96e-13	0	XOG1:ENG1:ATC1:PHO100:ADH2:ENO1:FGR41:HSP70:SIM1:RBE1:SOD4:PLB4.5:GPM1:YWP1:PIR1:TOS1:TDH3:TPI1:RBT5:RBT7:PDC11:SCW11:CAR1:ADH1:PGK1:PLB1:PRX1:LIP8:CR_01280C_A:PHO113:PHO112:PST3:PGI1:ALS3:CHT3	9986:324:5621:5886:5737:5622:5635:97311:935:71014:9277:31934:15:30428:43332:31314:45121:31160:9514:5811:5935:30445:30446:5829:328:5758:1990819:5783:5739:71944:30287:16020:5634:9897:34399:5576
5886	plasma membrane	49 out of 275 genes, 17.8%	529 out of 13081 background genes, 4.0%	5.87e-10	0	RIM8:C1_00310W_A:PDR16:PIL1:SYG1:ERG3:C1_07440W_A:CDR4:ADH2:ENO1:C1_08610C_A:PHO84:HSP70:FTR1:HGT7:HGT8:HGT6:BCY1:C2_02410W_A:ZRT2:CDC19:RTA3:GIT1:FRP3:SIT1:C3_01540W_A:C3_01910C_A:CDR1:TDH3:SLK19:TPI1:SEC61:RBT5:FBA1:AHP1:SUL2:PDC11:C5_02110W_A:ADH1:FET34:FET31:PGK1:CTR1:C7_00430W_A:CSP37:QDR1:PST3:PGI1:GLK1	9986:324:329:5886:790:5887:9898:5952:31307:5737:5622:97311:71014:9277:31934:15:5784:45121:30176:33573:9514:16021:5811:97249:30445:30446:5768:5829:5783:5739:5794:5788:32126:31305:16020:32541:5634:9897:5576:5741
30445	yeast-form cell wall	16 out of 275 genes, 5.8%	55 out of 13081 background genes, 0.4%	9.63e-10	0	ENO1:HSP70:SOD4:WH11:CDC19:YWP1:PIR1:TDH3:RBT5:AHP1:PDC11:HSP12:C5_02110W_A:ADH1:PGK1:ALS3	9986:324:5621:5886:5737:5622:97311:71014:9277:15:9514:5811:30445:30446:5768:5829:5739:16020:5634:9897:34399:5576
31224	intrinsic component of membrane	38 out of 275 genes, 13.8%	529 out of 13081 background genes, 4.0%	0.00019	0	ROA1:CWH8:C1_02700C_A:SYG1:PEX3:CDR4:C1_08610C_A:KEX2:PHO84:FTR1:HGT7:HGT8:HGT6:C2_02410W_A:ZRT2:C2_02800W_A:RTA3:GIT1:FRP3:C2_07440C_A:C2_07760W_A:C3_00170C_A:ATO2:C3_01910C_A:CDR1:SLK19:SEC61:C4_02420C_A:SUL2:VTC4:YDC1:GIT3:CTR1:CSP37:CR_03620C_A:QDR1:CR_07160C_A:CR_07480W_A	9986:324:329:5886:97042:32153:5887:31307:5737:30173:33254:31310:5778:5802:5784:45121:30176:33573:5789:30134:16021:5811:97249:30446:5783:5739:5794:5779:71944:32126:31305:16020:5634
16021	integral component of membrane	36 out of 275 genes, 13.1%	498 out of 13081 background genes, 3.8%	0.00033	0	ROA1:CWH8:C1_02700C_A:SYG1:PEX3:CDR4:C1_08610C_A:KEX2:PHO84:FTR1:HGT7:HGT8:HGT6:C2_02410W_A:ZRT2:C2_02800W_A:RTA3:GIT1:FRP3:C2_07440C_A:C2_07760W_A:ATO2:C3_01910C_A:CDR1:SLK19:SEC61:C4_02420C_A:SUL2:YDC1:GIT3:CTR1:CSP37:CR_03620C_A:QDR1:CR_07160C_A:CR_07480W_A	9986:324:329:5886:97042:5887:31307:5737:30173:5778:5802:5784:45121:30176:33573:5789:30134:16021:5811:97249:30446:5783:5739:5794:5779:71944:32126:31305:16020:5634
31012	extracellular matrix	12 out of 275 genes, 4.4%	74 out of 13081 background genes, 0.6%	0.00048	0	ADH2:ENO1:HSP70:GPM1:TDH3:TPI1:PDC11:CAR1:ADH1:PGK1:PST3:PGI1	9986:324:5886:5737:5622:97311:71014:9277:31934:15:43332:45121:9514:5811:30445:30446:5829:5758:5739:16020:5634:9897:5576
44421	extracellular region part	12 out of 275 genes, 4.4%	74 out of 13081 background genes, 0.6%	0.00048	0	ADH2:ENO1:HSP70:GPM1:TDH3:TPI1:PDC11:CAR1:ADH1:PGK1:PST3:PGI1	9986:324:5886:5737:5622:97311:71014:9277:31934:15:43332:45121:9514:5811:30445:30446:5829:5758:5739:16020:5634:9897:5576
97311	biofilm matrix	12 out of 275 genes, 4.4%	74 out of 13081 background genes, 0.6%	0.00048	0	ADH2:ENO1:HSP70:GPM1:TDH3:TPI1:PDC11:CAR1:ADH1:PGK1:PST3:PGI1	9986:324:5886:5737:5622:97311:71014:9277:31934:15:43332:45121:9514:5811:30445:30446:5829:5758:5739:16020:5634:9897:5576
16020	membrane	79 out of 275 genes, 28.7%	1595 out of 13081 background genes, 12.2%	0.00143	0	RIM8:C1_00310W_A:ROA1:CWH8:C1_02700C_A:PDR16:PIL1:SYG1:ERG3:PEX3:C1_07440W_A:CDR4:ADH2:ENO1:C1_08610C_A:KEX2:PHO84:HSP70:SIM1:FTR1:WSC4:HGT7:HGT8:HGT6:BCY1:C2_02410W_A:ZRT2:C2_02800W_A:CDC19:RTA3:GIT1:FRP3:C2_07440C_A:YVC1:C2_07760W_A:SIT1:C3_00170C_A:ATO2:C3_01540W_A:C3_01910C_A:C3_03230C_A:CDR1:RCT1:TDH3:SLK19:TPI1:SEC61:RBT5:FBA1:AHP1:C4_02420C_A:SUL2:VTC4:PDC11:YDC1:GIT3:TFS1:C5_02110W_A:C5_0…	5628:9986:42645:324:31966:1990816:329:5967:5886:790:97042:32153:5887:9898:5952:31307:5622:5737:5840:30173:33254:19867:31310:97311:71014:9277:31934:15:5778:5802:31314:5784:45121:30176:33573:5789:30134:9514:16021:5811:97249:30445:30446:5768:5829:328:5783:5739:5794:5779:71944:30287:5788:32126:31305:16020:32541:5634:9897:5576:5741
30287	cell wall-bounded periplasmic space	4 out of 275 genes, 1.5%	6 out of 13081 background genes, 0.0%	0.00242	0	ATC1:PHO100:PHO113:PHO112	9986:324:9277:31160:5783:71944:30287:16020:5576
42597	periplasmic space	4 out of 275 genes, 1.5%	9 out of 13081 background genes, 0.1%	0.01894	0	ATC1:PHO100:PHO113:PHO112	9986:324:9277:31160:5783:71944:30287:16020:5576
33254	vacuolar transporter chaperone complex	3 out of 275 genes, 1.1%	4 out of 13081 background genes, 0.0%	0.02153	0	C3_00170C_A:VTC4:VTC3	329:32153:33254:31310:5783:71944
786	nucleosome	4 out of 275 genes, 1.5%	12 out of 13081 background genes, 0.1%	0.06907	0.0042	HHF1:HHT21:HHF22:HHT2	43505:786:1990707:31298:31934:31618:5634

## Sheet: 6. GO component - subset
List of genes with cell wall, cell periphery, or cell membrane GO components.
Gene Names
ADH1
ADH2
AHP1
ALS3
ALS9
ATC1
ATO2
BCY1
C1_00310W_A
C1_02700C_A
C1_07440W_A
C1_08610C_A
C1_10460W_A
C2_02410W_A
C2_02800W_A
C2_07440C_A
C2_07760W_A
C3_00170C_A
C3_01540W_A
C3_01910C_A
C3_03230C_A
C3_03680W_A
C4_02420C_A
C4_05610C_A
C5_02110W_A
C5_03470C_A
C7_00430W_A
CAT1
CDC19
CDR1
CDR4
CHT3
CR_03620C_A
CR_04820W_A
CR_07160C_A
CR_07470W_A
CR_07480W_A
CSH1
CSP37
CTR1
CWH8
DBF2
DDR48
DSE1
EBP1
ENG1
ENO1
ERG3
FBA1
FET31
FET34
FRP3
FTR1
GIN4
GIT1
GIT3
GLK1
GPH1
GPM1
GPM2
HGT6
HGT7
HGT8
HSP12
HSP70
IQG1
KEX2
LAT1
PDC11
PDR16
PEX3
PGA6
PGA62
PGI1
PGK1
PHO112
PHO113
PHO84
PIL1
PIR1
PRP13
PST3
QDR1
RBE1
RBT5
RCT1
RIM8
ROA1
RTA3
SCW11
SEC61
SIM1
SIT1
SLK19
SOD4
SUL2
SYG1
TDH3
TFS1
TOS1
TPI1
VTC3
VTC4
WH11
WSC4
XOG1
YDC1
YVC1
YWP1
ZRT2

## Sheet: 7. KEGG analysis
KEGG analysis of differentially bound genes in the cas5∆/cas5∆ mutant in comparison to the wild type strain under basal condition.
	Total DEG	UP	DOWN
Glycolysis / Gluconeogenesis	11	0	11
Starch and sucrose metabolism	6	0	6
Galactose metabolism	2	0	2
Fructose and mannose metabolism	5	0	5
Pyruvate metabolism	10	4	6
Citrate cycle	7	6	1
Oxidative phosphorylation	14	13	1
One carbon pool by folate	5	5	0
Glyoxylate and dicarboxylate metabolism	5	5	0
Steroid biosynthesis	4	0	4
Purine metabolism	20	16	4
Tryptophan metabolism	3	0	3
Lysine degradation	2	0	2
Lysine biosynthesis	6	4	2
Histidine metabolism	3	2	1
Pentose phosphate pathway	3	2	1
Valine, leucine and isoleucine degradation	3	2	1
Arginine biosynthesis	3	2	1
Tyrosine metabolism	3	1	2
Phenylalanine metabolism	3	1	2
Arginine and proline metabolism	4	2	2
Alanine, aspartate and glutamate metabolism	7	6	1
Glycine, serine and threonine metabolism	9	8	1
Amino sugar and nucleotide sugar metabolism	6	1	5
Valine, leucine and isoleucine biosynthesis	5	5	0
Cysteine and methionine metabolism	10	7	3
Phenylalanine, tyrosine and tryptophan biosynthesis	7	5	2
DNA replication	5	1	4
Meiosis - yeast	11	1	10
Cell cycle - yeast	10	1	9
N-Glycan biosynthesis	2	1	1
Methane metabolism	7	4	3
Biosynthesis of antibiotics	55	36	19
Pyrimidine metabolism	6	4	2
Metabolic pathways	96	64	32
Biosynthesis of secondary metabolites	57	38	19
Spliceosome	6	4	2
Ribosome	3	2	1
Biosynthesis of amino acids	34	25	9
MAPK signaling pathway - yeast	4	3	1
Endocytosis	4	3	1
Protein processing in endoplasmic reticulum	4	3	1
2-Oxocarboxylic acid metabolism	14	12	2
Ribosome biogenesis in eukaryotes	14	13	1
Nitrogen metabolism	1	1	0
Arachidonic acid metabolism	1	1	0
Glutathione metabolism	2	2	0
Vitamin B6 metabolism	3	3	0
Various types of N-glycan biosynthesis	1	1	0
Monobactam biosynthesis	1	1	0
RNA polymerase	2	2	0
Base excision repair	1	1	0
Carbapenem biosynthesis	1	1	0
Cyanoamino acid metabolism	1	1	0
Pantothenate and CoA biosynthesis	3	3	0
RNA transport	3	3	0
Glycerolipid metabolism	2	0	2
Glycerophospholipid metabolism	2	0	2
Inositol phosphate metabolism	1	0	1
Pentose and glucuronate interconversions	1	0	1
Propanoate metabolism	1	0	1
Fatty acid degradation	1	0	1
Peroxisome	1	0	1
beta-Alanine metabolism	1	0	1
Ascorbate and aldarate metabolism	1	0	1
Ubiquinone and other terpenoid-quinone biosynthesis	1	0	1
Ubiquitin mediated proteolysis	1	0	1
Regulation of mitophagy - yeast	1	0	1
Sphingolipid metabolism	1	0	1
Sulfur metabolism	2	0	2
Hippo signaling pathway -multiple species	1	0	1
Nicotinate and nicotinamide metabolism	1	0	1
Porphyrin and chlorophyll metabolism	1	0	1
Sulfur relay system	1	0	1
Longevity regulating pathway - multiple species	3	1	2
Biosynthesis of unsaturated fatty acids	2	1	1
Fatty acid metabolism	2	1	1
Carbon metabolism	28	15	13
