# Supplementary material for: The Candida albicans transcription factor Cas5 couples stress responses, drug resistance and cell cycle regulation
Source: Nat Commun. 2017 Sep 11;8:499. doi: 10.1038/s41467-017-00547-y (PMC5593949; doi:10.1038/s41467-017-00547-y)
Supplement: Supplementary file 3 — Supplementary Data 2 [file 41467_2017_547_MOESM3_ESM.xlsx]

## Sheet: Legend
Supplementary Data 2 - RNA PolII ChIP-seq data for the wild type strain comparing basal and caspofungin treatment conditions.
Sheet 1: Normalized RNA PolII occupancy of differentially bound genes in the wild type strain under basal and caspofungin treatment conditions.
The ORF numbers under gene names are derived from Genome Assembly 21.
All genes with greater than 1.5-fold change in RNA PolII binding are listed.
A negative Log2FC indicates that the gene was bound by RNA PolII at higher levels under basal condition than caspofungin treatment condition in the wild type strain.
Sheet 2: GO processes of all genes with increased RNA PolII occupancy in the wild type strain in response to caspofungin.
The gene names are derived from Genome Assembly 22.
The genes are categorized by processes using CGD GO Term finder function.
Only GO processes with a corrected P-value of < 0.1 are included.
Sheet 3: GO processes of all genes with decreased RNA PolII occupancy in the wild type strain in response to caspofungin.
The gene names are derived from Genome Assembly 22.
The genes are categorized by processes using CGD GO Term finder function.
Only GO processes with a corrected P-value of < 0.1 are included.
Sheet 4: GO components of all genes with increased RNA PolII occupancy in the wild type strain in response to caspofungin.
The gene names are derived from Genome Assembly 22.
The genes are categorized by processes using CGD GO Term finder function.
Only GO components with a corrected P-value of < 0.1 are included.
Sheet 5: GO components of all genes with decreased RNA PolII occupancy in the wild type strain in response to caspofungin.
The gene names are derived from Genome Assembly 22
The genes are categorized by processes using CGD GO Term finder function.
Only GO components with a corrected P-value of < 0.1 are included.
Sheet 6: KEGG analysis of differentially bound genes in the wild type strain in response to caspofungin.
DBGs are differentially bound genes defined by genes with greater than 1.5 fold difference in PolII ChIPseq signals between the cas5∆/cas5∆ mutant and the wild type strain.

## Sheet: 1. PolII occupancy
Normalized RNA PolII occupancy of differentially bound genes in the wild type strain under basal and caspofungin treatment conditions.
WT caspo UP	PolII level		Fold change	Log2FC			WT caspo DOWN	PolII level		Fold change
Gene names	Minus Caspo	Plus Caspo	[+/-]				Gene names	Minus Caspo	Plus Caspo	[+/-]	Log2FC
orf19.711	7.5519	166.56	21.7802	4.44495			orf19.3448	21.4434	1.5154	0.0749835	-3.73728
ALS1	6.8589	107.117	15.4072	3.94553			PHO100	183.27	15.6389	0.0858315	-3.54235
RTA2	21.7694	320.265	14.649	3.87273			orf19.4211	112.822	10.5603	0.0944044	-3.405
DDR48	26.6921	277.478	10.3604	3.37301			RBT5	44.2742	4.5769	0.105397	-3.2461
PGA23	5.3052	53.6732	9.94842	3.31447			PLB1	63.6423	6.8714	0.109369	-3.19273
orf19.4706	18.145	152.222	8.34873	3.06156			SOD4	57.4163	9.2458	0.16249	-2.62158
CRH11	24.7866	203.138	8.16655	3.02973			GIT1	127.977	21.0452	0.165098	-2.5986
orf19.2125	15.0174	119.202	7.89169	2.98033			orf19.1691	27.7292	4.7709	0.175028	-2.51434
orf19.675	58.128	448.493	7.70407	2.94562			orf19.4189	48.3454	8.5435	0.178417	-2.48667
ECM331	6.8772	52.2863	7.50821	2.90847			CHT3	48.8511	10.5009	0.216561	-2.20715
orf19.6840	11.5249	80.5664	6.9391	2.79475			RBE1	67.9686	15.125	0.223671	-2.16055
orf19.5814.1	15.5437	106.952	6.84316	2.77466			PGA38	80.0238	19.0155	0.238575	-2.06749
orf19.7504	14.3948	98.0811	6.77354	2.75991			YWP1	392.4	95.0091	0.242316	-2.04504
orf19.1765	7.7166	45.3468	5.81414	2.53957			OPT1	18.8068	4.5464	0.245753	-2.02472
CRD2	10.5941	57.0374	5.34289	2.41762			orf19.5267	46.8726	11.7408	0.252079	-1.98805
orf19.263.1	27.9935	140.873	5.018	2.32711			orf19.4907	32.2821	8.4341	0.263544	-1.92389
SAP9	25.9756	123.895	4.7552	2.24951			ENG1	45.1249	11.9603	0.266674	-1.90685
PGA52	26.8021	122.681	4.564	2.1903			SCW11	75.4964	20.6899	0.275012	-1.86243
PGA6	84.466	370.704	4.38479	2.13251			FGR41	47.1421	13.0832	0.279056	-1.84137
SOD5	5.3088	23.3458	4.33475	2.11595			FRE10	41.0717	11.4263	0.279957	-1.83672
INO1	4.7075	20.3858	4.26122	2.09127			CDR4	26.7686	7.8415	0.295568	-1.75844
orf19.7296	8.9116	38.0856	4.23738	2.08317			FCR1	49.426	14.6522	0.297868	-1.74726
orf19.2445	3.7974	16.1987	4.18194	2.06417			orf19.557	16.2799	4.9312	0.307157	-1.70295
orf19.2959.1	38.5606	158.965	4.11439	2.04068			AMN1	13.2582	4.0268	0.308934	-1.69463
orf19.2726	11.0692	44.4346	3.98727	1.9954			PGA53	55.6383	17.7151	0.31962	-1.64557
RTA4	6.3592	25.6081	3.98007	1.9928			HSP12	46.6207	15.0006	0.32321	-1.62946
orf19.3461	13.8897	53.8994	3.85994	1.94858			orf19.6008	13.9232	4.4809	0.326666	-1.61411
orf19.4771	7.7588	29.268	3.73696	1.90186			CTR1	795.753	260.816	0.327844	-1.60892
orf19.4476	5.3878	20.2556	3.70925	1.89113			FTR1	60.157	19.8963	0.33185	-1.5914
MNN1	5.2027	19.4401	3.68493	1.88164			orf19.3325	25.6909	8.7765	0.344172	-1.5388
ATG15	15.3849	55.9369	3.61881	1.85552			AHP1	138.306	48.0489	0.347881	-1.52334
CRZ1	10.9924	38.9401	3.51954	1.81539			orf19.4216	44.6474	17.0897	0.38415	-1.38026
CSH1	12.6842	44.4454	3.48441	1.80091			CDC6	22.7062	8.6771	0.384856	-1.37761
orf19.1950	11.2372	39.2041	3.46683	1.79362			PDR16	15.1907	5.803	0.386052	-1.37313
PHR2	56.9671	195.525	3.42798	1.77736			orf19.1169	19.6751	7.8138	0.40019	-1.32124
DFG10	8.5505	29.4563	3.41672	1.77261			OPT7	16.5649	6.6184	0.403147	-1.31062
orf19.2030	17.7018	60.7	3.41538	1.77205			orf19.787	36.2467	14.5674	0.403541	-1.30921
orf19.5814	11.4269	39.0405	3.39558	1.76366			DSE1	24.326	9.9176	0.41012	-1.28588
RCT1	148.643	504.355	3.39146	1.7619			OPT9	10.5071	4.2588	0.410932	-1.28303
orf19.675.1	4.4529	15.2945	3.38125	1.75756			orf19.1150.1	39.6928	16.3392	0.41312	-1.27537
MNN15	9.1938	31.3101	3.37968	1.75689			HGT7	384.662	160.475	0.417336	-1.26072
orf19.5614	9.6039	32.2451	3.33321	1.73691			PLB4.5	20.2305	8.4235	0.419247	-1.25413
orf19.6896	16.8054	55.8724	3.31092	1.72723			PHO112	32.8114	13.8049	0.422495	-1.24299
CHS2	9.397	30.7938	3.25301	1.70177			ACE2	26.8724	11.4239	0.427248	-1.22685
KRE1	25.963	82.9171	3.18525	1.67141			HGT6	37.1081	15.8428	0.428477	-1.22271
orf19.6920	17.4235	54.5176	3.11682	1.64007			ALD5	75.8661	32.6224	0.43075	-1.21508
HAC1	29.6769	91.9636	3.09178	1.62844			ASH1	48.1813	20.7095	0.431005	-1.21422
FGR6-10	13.3906	41.0816	3.05261	1.61005			orf19.1562	12.2339	5.2176	0.431137	-1.21378
MIT1	20.6341	61.6193	2.97671	1.57372			OSM2	25.98	11.145	0.431173	-1.21366
orf19.2887	28.3601	83.9827	2.95441	1.56287			NAG3	32.7866	14.0946	0.431623	-1.21216
HBR3	10.5176	30.5673	2.88835	1.53024			orf19.7104	43.149	18.7157	0.435055	-1.20073
orf19.210	10.434	29.9602	2.85364	1.5128			orf19.1522	15.4721	6.7096	0.437295	-1.19332
PMC1	11.6012	33.1986	2.84574	1.50881			orf19.1368	12.0225	5.2158	0.438507	-1.18933
UTR2	27.3854	77.8001	2.83424	1.50296			orf19.3869	77.1799	33.9968	0.441212	-1.18046
DAG7	6.6343	18.9845	2.83392	1.5028			orf19.334	55.2188	24.478	0.444297	-1.1704
GFA1	26.251	73.2629	2.78407	1.47719			orf19.3469	19.9602	8.8147	0.444397	-1.17008
orf19.5861.1	6.8972	19.2484	2.76516	1.46736			orf19.1887	16.9883	7.5155	0.445656	-1.166
orf19.1913	32.25	88.3727	2.73486	1.45147			FET34	35.7471	15.9447	0.447587	-1.15976
FGR6-4	19.2556	52.5509	2.72019	1.44371			SIT1	11.677	5.1994	0.449979	-1.15207
BMT6	17.2057	46.672	2.70269	1.4344			orf19.409	67.2395	30.602	0.455929	-1.13312
BRG1	8.0652	21.5561	2.65224	1.40721			MSN4	23.4738	10.6885	0.457648	-1.12769
orf19.727	16.0155	42.602	2.64975	1.40585			FLU1	20.4482	9.3448	0.459641	-1.12142
FGR6-3	15.2534	40.2879	2.63055	1.39536			orf19.6311	12.8256	5.8534	0.46059	-1.11845
orf19.3932	11.5999	30.5941	2.62345	1.39147			IQG1	14.8199	6.7749	0.460787	-1.11783
CCH1	9.1397	23.8922	2.59664	1.37665			MCM2	16.2231	7.4291	0.461254	-1.11637
PLC2	9.5743	24.8402	2.57798	1.36624			orf19.2175	22.9195	10.5729	0.463646	-1.1089
FGR6-1	12.2642	31.7473	2.57577	1.365			ROB1	42.8642	19.8549	0.464454	-1.10639
CRL1	10.8057	27.464	2.52749	1.3377			URA4	30.0846	13.941	0.465171	-1.10417
FLC2	18.0053	45.6529	2.52704	1.33745			PEX3	17.2391	8.0139	0.467954	-1.09556
PNG2	17.2532	43.3773	2.50543	1.32506			orf19.6079	60.1697	28.2735	0.470776	-1.08689
PHR1	7.6083	19.1387	2.49584	1.31953			FRE7	174.567	82.4978	0.472888	-1.08043
orf19.1430	4.9235	12.4197	2.49223	1.31744			GOR1	17.3508	8.1538	0.472975	-1.08016
orf19.5290	6.0241	14.8559	2.44214	1.28814			orf19.1508	14.0134	6.5776	0.473139	-1.07966
CEK1	7.056	17.34	2.43712	1.28517			KIP2	12.3814	5.8284	0.474979	-1.07407
CZF1	9.7542	23.9019	2.4357	1.28434			PHO113	61.2054	29.3036	0.479625	-1.06002
CRZ2	9.136	22.1758	2.41184	1.27014			COI1	20.4607	9.8216	0.482552	-1.05124
orf19.211	16.0218	38.6089	2.40103	1.26365			RFC52	22.9009	11.0511	0.484811	-1.0445
orf19.1208	13.3438	31.8868	2.3793	1.25054			CDC5	38.3531	18.6829	0.488463	-1.03368
KRE9	34	79.5482	2.33572	1.22387			orf19.1152	44.1722	21.5513	0.48905	-1.03195
orf19.5813	31.3538	73.1361	2.32837	1.21932			CWH8	10.7258	5.1988	0.48946	-1.03074
orf19.4792	6.1515	14.3296	2.30818	1.20676			orf19.9	13.0397	6.3352	0.489752	-1.02988
orf19.862	15.6942	36.0547	2.28911	1.19479			CDC54	16.1454	7.8971	0.492269	-1.02248
OPY2	14.2991	32.6924	2.27739	1.18738			orf19.2237.1	20.3348	10.085	0.498414	-1.00458
PEP8	13.0688	29.7765	2.26873	1.18189			ATO2	31.6602	15.7555	0.499225	-1.00224
MUC1	9.8286	22.392	2.26537	1.17975			orf19.7588	11.0064	5.4984	0.50407	-0.988305
IFU5	17.5328	39.7736	2.26133	1.17717			FRE30	211.643	107.01	0.505846	-0.983231
HGC1	5.0471	11.3654	2.22755	1.15545			orf19.5019	13.1662	6.6245	0.50689	-0.980256
PGA13	5.8798	13.1454	2.21502	1.14732			POL93	47.0872	24.0875	0.512586	-0.964134
orf19.6554	7.4756	16.6266	2.20796	1.14271			ASR2	21.1776	10.8704	0.515584	-0.955719
orf19.1344	6.5672	14.5528	2.19774	1.13602			orf19.6770	26.1664	13.4702	0.516637	-0.952776
KRE6	17.5977	38.764	2.19599	1.13487			ADAEC	67.253	34.8099	0.518312	-0.948106
orf19.5775	13.6698	30.0447	2.18919	1.1304			orf19.1258	41.5528	21.5146	0.518923	-0.946407
ZCF39	34.4145	75.2495	2.18313	1.1264			orf19.6983	15.5963	8.0463	0.518995	-0.946208
orf19.4780	11.4975	25.0829	2.17141	1.11863			orf19.1334	10.4176	5.3801	0.521041	-0.940531
KTR4	8.3604	18.2568	2.16973	1.11752			RHD3	12.9481	6.7109	0.521984	-0.937922
IRS4	9.9837	21.7588	2.16774	1.11619			orf19.1964	11.627	6.0234	0.522163	-0.937429
orf19.2049	5.4321	11.766	2.14494	1.10093			HGT8	54.1125	28.2089	0.522184	-0.93737
SAC6	14.8104	31.6121	2.12684	1.08871			orf19.6222.1	14.4904	7.5313	0.523036	-0.935019
orf19.3815	12.0543	25.6112	2.1154	1.08093			orf19.1114	17.4389	9.1262	0.526042	-0.92675
PGA54	62.1028	131.457	2.11496	1.08063			TRY6	21.4575	11.2935	0.528517	-0.919979
RTA3	26.2106	55.4042	2.10958	1.07695			ZCF2	26.3644	13.9169	0.529651	-0.916886
FTR2	7.1745	15.2118	2.10486	1.07372			PRX1	31.2959	16.5379	0.529939	-0.916103
orf19.7085	12.5791	26.583	2.10449	1.07347			FCY2	16.1681	8.5305	0.530517	-0.91453
orf19.7458	12.4091	26.0338	2.08918	1.06294			NCE102	118.648	63.3604	0.534411	-0.903978
orf19.1267	11.7102	24.1973	2.05731	1.04076			orf19.6951	20.8784	11.1172	0.534702	-0.903192
orf19.4043	28.1995	57.8284	2.04698	1.03349			orf19.6795	13.0775	6.954	0.535306	-0.901563
orf19.7210	9.074	18.673	2.04633	1.03304			orf19.6537	15.7648	8.3972	0.535601	-0.90077
orf19.1441	17.5343	35.934	2.0434	1.03097			PIL1	97.6737	52.414	0.537097	-0.896744
BMT3	11.9835	24.5774	2.04224	1.03015			orf19.6118	41.0825	22.0475	0.537789	-0.894888
orf19.3854	21.1629	43.312	2.04168	1.02976			SUL2	16.3784	8.771	0.538341	-0.893408
orf19.676	14.4169	29.4392	2.03481	1.0249			EBP1	10.1469	5.4372	0.540378	-0.887959
PCL1	26.5664	54.1024	2.03261	1.02333			PGA48	88.9418	48.1475	0.541852	-0.884029
CHS7	14.5202	29.4556	2.02156	1.01547			GLK1	29.5662	15.9927	0.542459	-0.882414
orf19.6264.3	41.1379	83.0631	2.01667	1.01197			SYG1	10.1854	5.4871	0.543207	-0.880426
MUM2	25.8857	52.0241	2.00588	1.00423			GIT3	303.45	165.332	0.54499	-0.875697
FLC1	17.4013	34.9975	2.00542	1.00391			orf19.3447	14.7297	8.0006	0.546242	-0.872389
GRP2	30.3485	60.9111	2.00375	1.0027			WH11	23.0623	12.559	0.546535	-0.871615
WSC2	25.8669	51.8647	2.00119	1.00086			TRX2	15.2331	8.296	0.547574	-0.868875
orf19.2565	5.5794	11.1779	1.98576	0.989688			orf19.5842	15.8829	8.6571	0.547904	-0.868004
RFC5	13.605	27.0525	1.98121	0.986383			orf19.3364	33.1659	18.1393	0.548288	-0.866994
GAP6	31.4603	61.4245	1.94943	0.96305			CDC20	17.1906	9.3941	0.54909	-0.864885
orf19.951	12.6294	24.5434	1.93594	0.953037			MCM3	17.3938	9.5071	0.549172	-0.864671
GSC1	34.8635	67.522	1.93407	0.951643			MET10	20.0682	11.0106	0.550897	-0.860146
orf19.3737	11.4522	22.14	1.92517	0.944989			RIB3	31.3256	17.2228	0.551232	-0.859268
orf19.374	21.4535	41.3905	1.925	0.944859			orf19.3894	18.9008	10.4113	0.553203	-0.854119
SWE1	14.9993	28.9447	1.92358	0.943793			orf19.4942	69.0745	38.1896	0.553522	-0.853288
orf19.192	7.7561	14.9987	1.92191	0.942539			ADE13	14.339	7.9462	0.557255	-0.843591
FGR22	5.665	10.9741	1.92092	0.941797			MET14	33.6603	18.783	0.559326	-0.83824
orf19.4893	9.3045	17.8141	1.90484	0.929672			orf19.4749	11.0129	6.1316	0.560754	-0.834561
PEX4	20.3386	38.5912	1.89305	0.920709			HOF1	15.5167	8.6773	0.562046	-0.831241
orf19.3827	8.834	16.8078	1.89252	0.920311			orf19.1948	23.553	13.2798	0.56567	-0.821967
orf19.3309	5.4548	10.3775	1.88621	0.915488			orf19.6741	16.6229	9.3938	0.567713	-0.816767
CHS3	16.5325	31.1749	1.88035	0.911			SOU1	15.7832	8.925	0.56821	-0.815503
DFI1	38.3799	72.0278	1.87443	0.90645			orf19.1600	17.3864	9.8656	0.569906	-0.811205
ENA21	31.4201	58.7545	1.86721	0.900881			ERG3	22.0534	12.6232	0.574323	-0.800067
orf19.6608	10.298	19.2756	1.8634	0.897935			orf19.6119	21.0922	12.1574	0.578392	-0.78988
orf19.6929	13.97	26.0655	1.85967	0.895043			orf19.7077	132.101	76.4321	0.578908	-0.788593
SFU1	14.6153	27.257	1.85909	0.894593			GLK4	16.5912	9.6094	0.581708	-0.781634
PST3	54.05	100.465	1.85715	0.893094			SOD3	87.8984	51.1952	0.582911	-0.778653
BGL2	39.407	72.8455	1.84639	0.884711			GPM1	295.298	172.524	0.584378	-0.775026
orf19.1146	16.6904	30.8512	1.84339	0.882359			MET1	28.141	16.4543	0.58618	-0.770585
BMT5	11.8009	21.8157	1.84152	0.880894			VTC3	43.7793	25.679	0.587498	-0.767344
orf19.376	6.9128	12.811	1.84106	0.880538			orf19.3678	18.1005	10.6183	0.588901	-0.763902
IML2	16.574	30.5597	1.83877	0.878743			PDC11	762.201	449.371	0.589624	-0.762133
orf19.3919.1	18.3708	33.7504	1.83264	0.873927			orf19.1893	15.9667	9.3873	0.590495	-0.760004
RFX1	7.9125	14.5839	1.83262	0.873911			CSP37	38.567	22.7522	0.591	-0.75877
CHO1	11.8775	21.8443	1.83213	0.873519			CDC46	16.314	9.6116	0.591666	-0.757146
orf19.6905	14.8512	27.2066	1.82638	0.868988			orf19.3335	34.5869	20.6163	0.597237	-0.743625
INN1	9.6655	17.7203	1.82482	0.867756			DBF2	11.5184	6.8405	0.597371	-0.7433
orf19.5006.1	28.4552	51.9154	1.82157	0.865185			orf19.909.1	12.3175	7.3183	0.597407	-0.743214
ITR1	11.5143	21.0144	1.81797	0.862325			TYE7	144.238	86.165	0.59766	-0.742603
PIN3	21.1169	38.1094	1.80089	0.848714			orf19.3762	13.265	7.8915	0.597942	-0.741922
orf19.5352	29.0151	51.7506	1.78088	0.832593			ECM17	33.1708	19.8295	0.599009	-0.739351
MXR1	25.1027	44.7127	1.77809	0.830329			PHO81	15.6077	9.3224	0.599859	-0.737305
orf19.7070	8.5943	15.2288	1.76309	0.818103			NIT2	11.5696	6.9235	0.601863	-0.732493
RIM101	44.0056	77.565	1.76089	0.816303			BMT1	15.1853	9.1008	0.601938	-0.732314
SPS20	9.247	16.2981	1.75437	0.810953			orf19.2335	16.1527	9.7073	0.603426	-0.728751
orf19.7341.1	20.9117	36.6738	1.75016	0.807485			APE3	14.4134	8.6654	0.603952	-0.727494
orf19.3535	17.8447	31.2853	1.749	0.806531			orf19.2372	17.6754	10.6475	0.604628	-0.725881
SMP2	18.1537	31.8181	1.74858	0.806186			CDC19	347.74	210.419	0.605219	-0.724472
orf19.5431	15.1242	26.4704	1.74527	0.803454			PMA1	202.453	123.487	0.610147	-0.71277
CCN1	19.5245	34.1066	1.74306	0.801619			MIM1	23.5481	14.3658	0.611711	-0.709078
orf19.3826	24.2274	42.1304	1.73592	0.7957			RPL7	13.6563	8.3157	0.611771	-0.708937
STF2	26.9694	46.7693	1.73145	0.79198			CYK3	21.5819	13.1922	0.613055	-0.705911
orf19.7567	6.6281	11.5432	1.73053	0.791217			GAP4	49.0283	30.0684	0.614074	-0.703516
orf19.2431	10.874	18.8556	1.72732	0.788535			GSY1	30.8178	18.9204	0.615193	-0.70089
HOS3	9.7125	16.7402	1.7162	0.779217			orf19.6007	14.2638	8.7374	0.615255	-0.700744
orf19.6555	13.2414	22.7641	1.71377	0.777174			orf19.3679	13.5524	8.3188	0.616653	-0.697468
ECM21	6.4967	11.2032	1.71346	0.776915			orf19.1034	13.4734	8.2791	0.617318	-0.695915
orf19.5869	13.8908	23.8698	1.71325	0.776739			ASR3	17.0096	10.4753	0.618092	-0.694107
orf19.2203.1	6.2378	10.7376	1.70999	0.773991			XOG1	11.3009	6.9547	0.618784	-0.692491
orf19.7457	7.7563	13.2661	1.70132	0.766657			orf19.967	15.5134	9.5694	0.619301	-0.691286
STP4	37.0244	62.867	1.69611	0.762228			orf19.2261	25.5036	15.7635	0.619581	-0.690636
TUS1	9.1362	15.4791	1.68674	0.754241			ARO8	41.0183	25.4505	0.62139	-0.686429
GPR1	16.5275	27.8909	1.68341	0.751387			orf19.6240	16.4472	10.1879	0.621731	-0.685639
ROT1	22.9861	38.7041	1.68084	0.749185			CMK1	30.2606	18.7794	0.621839	-0.685387
VPS1	17.13	28.8254	1.67878	0.747414			STP1	27.463	17.0562	0.622436	-0.684003
orf19.6879	11.5302	19.4167	1.67811	0.746833			orf19.3319	41.3437	25.8215	0.625463	-0.677004
DOT5	11.775	19.8205	1.67752	0.746326			orf19.5755	17.4468	10.8807	0.625795	-0.676238
orf19.2123	6.1582	10.3923	1.67657	0.745511			TDH3	1055.54	662.56	0.627731	-0.671782
PGA33	16.3507	27.4521	1.67483	0.744013			PGK1	271.716	170.531	0.627745	-0.67175
orf19.4046	14.6565	24.5826	1.67266	0.742144			CSE4	30.3371	19.0078	0.62778	-0.671669
orf19.246	6.0873	10.235	1.67036	0.740156			PYC2	47.8474	30.0291	0.628378	-0.670295
orf19.5799	16.4765	27.5654	1.66895	0.738943			SLK19	29.2724	18.3603	0.628491	-0.670035
orf19.4666	14.8168	24.7405	1.66527	0.735756			orf19.787.1	102.221	64.2586	0.628988	-0.668895
SAC7	22.2395	36.988	1.6602	0.731356			orf19.6600	22.2445	13.9572	0.629112	-0.668611
orf19.7069	8.606	14.2991	1.65393	0.725897			DLD1	19.3182	12.1264	0.629636	-0.66741
RPN4	20.5896	34.0352	1.64987	0.722354			AAT22	13.651	8.5656	0.63018	-0.666165
JEM1	10.4664	17.3238	1.64898	0.721575			orf19.2761	13.2783	8.3352	0.630514	-0.665401
BMT7	7.276	11.9402	1.63235	0.706949			orf19.5049	12.6344	7.94	0.631361	-0.663464
orf19.25	11.6458	19.0527	1.6306	0.705403			orf19.5840	10.2755	6.4529	0.631574	-0.662975
orf19.7214	11.5663	18.9123	1.62968	0.704586			ADE6	10.3359	6.4912	0.631589	-0.662942
orf19.215	20.3974	33.2168	1.62542	0.700809			orf19.1287	46.6607	29.4553	0.632054	-0.66188
orf19.1953	10.7174	17.4755	1.62474	0.700212			ERG11	23.6759	14.9721	0.633923	-0.65762
orf19.6660	11.6067	18.896	1.62266	0.698361			GAC1	22.9239	14.5039	0.634293	-0.656779
HSE1	10.4424	16.9725	1.61941	0.695471			orf19.7580	53.6328	34.0236	0.635061	-0.655033
orf19.3259	11.883	19.284	1.61762	0.693877			ARO3	39.0318	24.7845	0.635915	-0.653094
orf19.2204	22.0156	35.6395	1.61603	0.692455			RCL1	17.5947	11.159	0.636292	-0.652239
orf19.4263	20.1037	32.5197	1.61454	0.691124			orf19.4825	21.5202	13.663	0.636581	-0.651585
orf19.372	34.0348	54.8892	1.61094	0.687905			orf19.6414	14.223	9.0708	0.640285	-0.643214
orf19.4134	6.5528	10.5829	1.60578	0.68327			PGI1	70.6188	45.2535	0.641322	-0.64088
orf19.1830	8.5464	13.7685	1.60396	0.68164			orf19.7100	12.9639	8.2873	0.642021	-0.639307
MCA1	13.7725	22.1228	1.60193	0.679813			FAD2	24.8019	15.9001	0.642525	-0.638175
orf19.4376	19.3055	30.8886	1.5969	0.675272			TPS3	34.5335	22.1732	0.643111	-0.636859
orf19.86	10.4421	16.7167	1.59519	0.673732			FMP27	13.2525	8.4928	0.643535	-0.63591
SKN1	7.2568	11.6274	1.59409	0.672733			GDH3	25.8919	16.6464	0.644293	-0.634211
AAF1	14.3156	22.7941	1.58815	0.667345			orf19.3432.1	76.9391	49.5673	0.644702	-0.633295
orf19.3219	8.1944	13.0666	1.58741	0.666673			orf19.1189	23.6396	15.2469	0.646468	-0.629348
orf19.6527	12.7614	20.3082	1.58678	0.666101			ACS1	17.2167	11.1002	0.646786	-0.62864
DPM1	19.9396	31.6248	1.58311	0.662757			orf19.178	15.0815	9.7474	0.648645	-0.6245
orf19.3501	11.7329	18.5949	1.57991	0.659841			orf19.5720	14.2639	9.249	0.650868	-0.619564
BMT4	22.2985	35.2798	1.57956	0.659524			SEC8	26.2857	17.0987	0.651819	-0.617457
SAP10	8.2667	13.1152	1.5795	0.659468			NMD5	12.6914	8.2431	0.652243	-0.616519
orf19.3080	11.3978	18.0592	1.57936	0.659343			ASE1	12.2608	7.9712	0.652967	-0.614917
orf19.1409.2	21.8509	34.5143	1.5769	0.657088			FRP3	39.0471	25.4725	0.653241	-0.614312
orf19.1910	29.3281	46.258	1.5753	0.655624			orf19.5757	17.3817	11.3229	0.65342	-0.613917
AUR1	17.3703	27.4148	1.57495	0.655303			orf19.2296	16.7973	10.9446	0.653631	-0.613452
DFG5	12.3297	19.4241	1.57076	0.651465			orf19.1240	11.2724	7.3419	0.654383	-0.611794
orf19.6090	20.5334	32.2744	1.56903	0.649872			ERG28	16.3457	10.6908	0.656147	-0.607909
ERO1	23.0718	36.253	1.56885	0.649704			DAK2	25.1271	16.4575	0.656338	-0.60749
PTP3	21.9519	34.4821	1.56821	0.649123			CHA1	18.3923	12.0556	0.657333	-0.605304
SOD1	12.0631	18.9101	1.56293	0.644255			ATX1	19.6581	12.9047	0.658196	-0.603411
orf19.1667.1	7.3402	11.5023	1.55941	0.640998			SNO1	13.7796	9.0436	0.65878	-0.602132
orf19.6030	7.5658	11.8459	1.55834	0.640007			orf19.6077	17.1941	11.2963	0.65897	-0.601714
orf19.4894	8.9307	13.9057	1.5509	0.633104			DAC1	22.048	14.5083	0.659576	-0.600388
orf19.3994	18.5631	28.8276	1.54999	0.632258			orf19.5455	64.5355	42.6141	0.660846	-0.597614
TVP18	17.1603	26.648	1.54968	0.631973			TPO3	14.7584	9.7319	0.661707	-0.595737
LAG1	15.1108	23.4021	1.54509	0.627694			ARA1	13.1563	8.6726	0.661768	-0.595602
UBI4	106.05	163.831	1.54432	0.626974			CHS1	25.0711	16.5577	0.661779	-0.595579
orf19.7110	19.9542	30.863	1.54397	0.626641			RBT7	14.3389	9.4572	0.661906	-0.595301
orf19.3919	7.6001	11.7875	1.54381	0.626496			ALP1	33.1746	21.9271	0.661979	-0.595142
ARE2	9.7141	15.0508	1.54378	0.626466			CFL1	10.9595	7.222	0.662055	-0.594976
GDH2	12.4912	19.3008	1.54082	0.6237			LYS1	23.3835	15.4835	0.663594	-0.591628
orf19.3328	13.8519	21.3788	1.53949	0.622452			ZCF1	11.2875	7.4567	0.663596	-0.591623
orf19.2925	6.8511	10.5968	1.53886	0.621866			DAL1	18.3788	12.1665	0.663815	-0.591147
orf19.7566	10.1971	15.696	1.53402	0.617321			ERG6	26.6219	17.6506	0.664272	-0.590155
orf19.782	8.7379	13.4502	1.53319	0.616539			orf19.904	28.202	18.7042	0.664412	-0.589849
WSC1	26.7016	40.9324	1.53097	0.614444			VTC4	39.8603	26.4963	0.665568	-0.587342
orf19.783	9.585	14.7027	1.52842	0.612036			TPI1	184.276	122.643	0.66572	-0.587012
SEC18	13.3368	20.4232	1.52739	0.611066			orf19.2371	35.2591	23.4483	0.665976	-0.586459
SSR1	38.5685	58.8767	1.52519	0.608986			SAM4	32.0193	21.332	0.667262	-0.583674
orf19.1266	19.3382	29.5185	1.52373	0.607604			HAP43	25.5256	17.0035	0.667438	-0.583294
orf19.674	7.7281	11.7966	1.51973	0.603815			MET2	30.7503	20.5648	0.669841	-0.578109
orf19.3087.2	38.5752	58.6607	1.51934	0.603443			orf19.33	262.428	175.756	0.669855	-0.57808
orf19.2308	38.0399	57.836	1.51904	0.603159			orf19.1140	12.0198	8.0324	0.671001	-0.575613
PLB3	14.4989	22.0543	1.51753	0.601727			orf19.394	28.5817	19.1512	0.671201	-0.575182
CAS5	17.6621	26.8461	1.51706	0.601274			HSP70	37.2891	24.9976	0.671254	-0.575068
orf19.4711	8.3746	12.7404	1.51516	0.599473			ERG251	88.6866	59.5374	0.671694	-0.574125
orf19.5518	29.1301	44.1387	1.51346	0.597854			orf19.3483	12.5706	8.4218	0.672565	-0.572255
orf19.3828	6.5877	10.0185	1.513	0.597413			orf19.3522	78.1078	52.5602	0.673337	-0.5706
RHR2	94.0389	142.317	1.51283	0.597254			orf19.6160	25.389	17.0774	0.673914	-0.569363
orf19.2680	13.2462	20.0098	1.50678	0.59147			MAE1	21.3862	14.3893	0.674354	-0.568422
YKE2	10.0903	15.2063	1.50205	0.586929
SIP5	10.7172	16.146	1.50187	0.586757
GPD2	27.3965	41.1327	1.49956	0.584541
DDI1	23.7942	35.7072	1.49857	0.583589
RCN1	7.9476	11.9496	1.49729	0.582355
AKR1	21.6788	32.5007	1.4969	0.581978
orf19.7260	23.6237	35.306	1.49243	0.577665
orf19.1414	16.1423	24.1186	1.49108	0.57636
MNN2	8.6215	12.8913	1.48957	0.574898
orf19.2459	8.1077	12.108	1.48738	0.572777
orf19.3123.2	6.9958	10.454	1.48736	0.572753
orf19.4596	12.4301	18.5188	1.48593	0.571362
orf19.7125	34.5806	51.3578	1.48376	0.569261
MID1	8.1637	12.1358	1.48067	0.566249
orf19.1374	11.2411	16.6915	1.48059	0.566171
orf19.433	9.0576	13.4554	1.48023	0.565826
NAT4	8.1267	12.069	1.47921	0.564825
orf19.2769	9.684	14.3493	1.47683	0.562503
CPP1	11.5814	17.1115	1.47341	0.55916
orf19.1658	20.6347	30.4491	1.47333	0.559083
orf19.7299.1	7.5003	11.0865	1.47185	0.55763
AGP2	15.8838	23.4251	1.47181	0.55759
GLX3	9.2056	13.5627	1.46822	0.554072
orf19.5517	15.098	22.1849	1.4663	0.552185
HPA2	7.6745	11.2874	1.46471	0.550617
ACO1	71.9633	105.329	1.46301	0.548935
VPS27	10.3917	15.2397	1.46208	0.548022
orf19.6117	42.6371	62.3543	1.46136	0.547312
orf19.916	13.2136	19.3494	1.46087	0.546825
PDE2	11.7831	17.2405	1.45926	0.545234
TPK1	15.8443	23.1617	1.45894	0.544916
orf19.7109	17.941	26.2028	1.45795	0.543937
orf19.7598	19.5758	28.4883	1.45297	0.539003
ACT1	73.2768	106.507	1.45288	0.538913
GLN1	108.01	156.791	1.45122	0.537265
orf19.4563	11.6723	16.9833	1.45114	0.53719
MOB2	15.1413	22.0064	1.45043	0.536478
ECM29	12.667	18.4149	1.45022	0.536267
orf19.3928	16.0955	23.3829	1.5	0.536018
GNA1	18.867	27.3883	1.5	0.535326
PGA1	28.9014	41.9205	1.5	0.534971
MNN12	11.1775	16.2343	1.5	0.534457

## Sheet: 2. GO process - UP genes
GO processes of all genes with increased RNA PolII occupancy in the wild type strain in response to caspofungin.
GOID	GO term	Cluster frequency	Background frequency	Corrected P-value	False discovery rate	Gene(s) annotated to the term	Directly Annotated GOID List
71852	fungal-type cell wall organization or biogenesis	44 out of 294 genes, 15.0%	247 out of 13081 background genes, 1.9%	4.27e-15	0	PHR2:MOB2:ROT1:CCH1:GSC1:PDE2:KTR4:TUS1:CHS7:HAC1:DPM1:OPY2:TPK1:CHO1:CHS3:ACT1:C1_14060W_A:RIM101:DFG5:C2_08920W_A:UTR2:GFA1:IRS4:SAP9:KRE9:WSC1:CRZ1:KRE6:CAS5:BGL2:SOD1:CRH11:SAP10:PHR1:C4_04560C_A:CEK1:MID1:WSC2:SSR1:BMT3:FLC2:PGA13:CHS2:PGA1	43936:32:1410:916:36178:1320:1900439:1900445:43709:7329:61400:45944:31579:33157:71468:48017:10914:1900240:30447:61454:31589:6281:7623:48315:55085:52155:43409:45454:71454:9272:1402:71280:6882:70417:6458:71483:11:6468:30476:71260:45461:30950:71467:61422:6659:32512:10895:30968:6816:7121:90002:42981:1900436:199:30010:751:71285:1900189:1766:10512:10674:36176:6038:1904541:1300:36244:1900432:15886:43967…
71554	cell wall organization or biogenesis	46 out of 294 genes, 15.6%	273 out of 13081 background genes, 2.1%	6.83e-15	0	PHR2:MOB2:ROT1:CCH1:GSC1:PDE2:KTR4:TUS1:CHS7:HAC1:DPM1:OPY2:TPK1:MNN2:CHO1:CHS3:ACT1:C1_14060W_A:RIM101:DFG5:C2_08920W_A:UTR2:GFA1:IRS4:SAP9:KRE9:WSC1:CRZ1:KRE6:CAS5:BGL2:SOD1:CRH11:SAP10:PHR1:C4_04560C_A:CEK1:MID1:WSC2:BMT4:SSR1:BMT3:FLC2:PGA13:CHS2:PGA1	43936:32:1410:916:36178:1320:1900439:1900445:43709:7329:61400:45944:31579:33157:71468:48017:10914:1900240:30447:61454:31589:6281:7623:48315:55085:52155:43409:45454:71454:9272:1402:71280:6882:70417:6458:71483:6486:11:6468:30476:71260:45461:30950:71467:61422:6659:32512:10895:30968:6816:6827:7121:90002:42981:1900436:199:30010:751:71285:1900189:1766:10512:10674:36176:6038:1904541:1300:36244:1900432:1…
31505	fungal-type cell wall organization	34 out of 294 genes, 11.6%	181 out of 13081 background genes, 1.4%	7.07e-12	0	PHR2:MOB2:CCH1:GSC1:PDE2:TUS1:HAC1:TPK1:CHS3:ACT1:C1_14060W_A:DFG5:C2_08920W_A:UTR2:IRS4:SAP9:KRE9:CRZ1:KRE6:CAS5:BGL2:SOD1:CRH11:SAP10:PHR1:C4_04560C_A:CEK1:MID1:WSC2:SSR1:FLC2:PGA13:CHS2:PGA1	916:36178:1320:1900445:43709:7329:45944:61400:31579:33157:71468:48017:10914:1900240:30447:61454:31589:6281:7623:48315:55085:52155:43409:45454:9272:1402:6882:70417:71483:11:6468:30476:71260:45461:30950:71467:61422:32512:10895:6816:90002:7121:1900436:42981:30010:751:1900189:1766:10674:36176:6038:1904541:1300:36244:1900432:15886:43967:44406:15883:165:1900622:98703:71474:44182:19933:33554:46827:32995…
45229	external encapsulating structure organization	34 out of 294 genes, 11.6%	182 out of 13081 background genes, 1.4%	8.4e-12	0	PHR2:MOB2:CCH1:GSC1:PDE2:TUS1:HAC1:TPK1:CHS3:ACT1:C1_14060W_A:DFG5:C2_08920W_A:UTR2:IRS4:SAP9:KRE9:CRZ1:KRE6:CAS5:BGL2:SOD1:CRH11:SAP10:PHR1:C4_04560C_A:CEK1:MID1:WSC2:SSR1:FLC2:PGA13:CHS2:PGA1	916:36178:1320:1900445:43709:7329:45944:61400:31579:33157:71468:48017:10914:1900240:30447:61454:31589:6281:7623:48315:55085:52155:43409:45454:9272:1402:6882:70417:71483:11:6468:30476:71260:45461:30950:71467:61422:32512:10895:6816:90002:7121:1900436:42981:30010:751:1900189:1766:10674:36176:6038:1904541:1300:36244:1900432:15886:43967:44406:15883:165:1900622:98703:71474:44182:19933:33554:46827:32995…
71555	cell wall organization	34 out of 294 genes, 11.6%	182 out of 13081 background genes, 1.4%	8.4e-12	0	PHR2:MOB2:CCH1:GSC1:PDE2:TUS1:HAC1:TPK1:CHS3:ACT1:C1_14060W_A:DFG5:C2_08920W_A:UTR2:IRS4:SAP9:KRE9:CRZ1:KRE6:CAS5:BGL2:SOD1:CRH11:SAP10:PHR1:C4_04560C_A:CEK1:MID1:WSC2:SSR1:FLC2:PGA13:CHS2:PGA1	916:36178:1320:1900445:43709:7329:45944:61400:31579:33157:71468:48017:10914:1900240:30447:61454:31589:6281:7623:48315:55085:52155:43409:45454:9272:1402:6882:70417:71483:11:6468:30476:71260:45461:30950:71467:61422:32512:10895:6816:90002:7121:1900436:42981:30010:751:1900189:1766:10674:36176:6038:1904541:1300:36244:1900432:15886:43967:44406:15883:165:1900622:98703:71474:44182:19933:33554:46827:32995…
5976	polysaccharide metabolic process	16 out of 294 genes, 5.4%	74 out of 13081 background genes, 0.6%	1.51e-05	0	GSC1:CHS7:MNN2:CHS3:C1_14060W_A:UTR2:GFA1:KRE9:CRZ1:SKN1:KRE6:CRH11:BMT4:BMT3:KRE1:CHS2	36178:1900445:7329:61400:71468:30447:6281:48315:71483:6486:71260:30476:61422:6827:7121:1900436:42981:6038:1904541:44406:1900622:44182:35269:70135:6355:2001040:9267:90529:46354:60257:97237:70783:36170:9405:70879:920:6037:30448:51223:61423:6078:6888:19722:71216:7163:42546:6487:34221:6031:31505:6042:61404:6457:36180:6402:34976:34217:128:1900429:35268:6075:70136:9652:35690:97301
40007	growth	57 out of 294 genes, 19.4%	694 out of 13081 background genes, 5.3%	2.51e-05	0	PHR2:MOB2:ROT1:HGC1:CCH1:PDE2:KTR4:BRG1:CHS7:HAC1:FGR6-3:CPP1:TPK1:MNN2:CHO1:CHS3:ACT1:RIM101:DFG5:FGR22:PLC2:STP4:DFG10:DDR48:FGR6-4:UTR2:GFA1:IRS4:SAP9:PEP8:KRE9:WSC1:CRZ1:AAF1:ECM29:UBI4:CAS5:BGL2:SOD1:PHR1:FGR6-10:CEK1:CZF1:VPS1:GPR1:CCN1:PCL1:MID1:SAC6:ALS1:FGR6-1:LAG1:PGA13:CHS2:RTA4:ZCF39:PGA1	43936:32:32878:1410:916:36178:1320:1900439:1900445:51726:30036:43709:200:7329:1900443:61400:45944:31579:30011:71468:48017:10914:1900240:30447:31589:6281:7623:71701:48315:55085:52155:43409:45454:71454:9272:60988:71280:1402:6882:70417:6458:16239:71483:6486:11:6468:30476:71260:45461:30950:71467:61422:6659:32512:34605:10895:51666:30968:71333:6816:6827:7121:1900436:42981:199:30010:751:71285:1900189:17…
34637	cellular carbohydrate biosynthetic process	14 out of 294 genes, 4.8%	61 out of 13081 background genes, 0.5%	5.47e-05	0	GSC1:CHS7:MNN2:CHS3:RHR2:GFA1:KRE9:CRZ1:SKN1:KRE6:BMT3:KRE1:CHS2:INO1	6021:36178:1900445:7329:61400:71468:30447:6281:48315:71483:6486:71260:30476:61422:6827:7121:6114:1900436:42981:6038:1900622:44182:6071:35269:70135:71470:44409:6355:2001040:9267:44011:90529:8654:46354:60257:97237:36170:9405:920:30448:51223:61423:6078:6888:19722:71216:7163:42546:6487:34221:6031:31505:6042:61404:6457:36180:6402:34976:36164:34217:128:1900429:35268:6075:70136:9652:35690:97301
30447	filamentous growth	55 out of 294 genes, 18.7%	675 out of 13081 background genes, 5.2%	6.13e-05	0	PHR2:MOB2:HGC1:CCH1:PDE2:KTR4:BRG1:CHS7:HAC1:FGR6-3:CPP1:TPK1:MNN2:CHO1:CHS3:ACT1:RIM101:DFG5:FGR22:PLC2:STP4:DFG10:DDR48:FGR6-4:UTR2:GFA1:IRS4:SAP9:PEP8:KRE9:WSC1:CRZ1:AAF1:ECM29:UBI4:CAS5:SOD1:PHR1:FGR6-10:CEK1:CZF1:VPS1:GPR1:CCN1:PCL1:MID1:SAC6:ALS1:FGR6-1:LAG1:PGA13:CHS2:RTA4:ZCF39:PGA1	43936:32:32878:1410:916:36178:1320:1900439:1900445:51726:30036:43709:200:7329:1900443:61400:45944:31579:30011:71468:48017:10914:1900240:30447:31589:6281:7623:71701:48315:55085:52155:43409:45454:71454:9272:60988:71280:1402:6882:70417:16239:71483:6486:11:6468:30476:71260:45461:71467:61422:6659:32512:34605:10895:51666:71333:6816:6827:7121:1900436:42981:199:30010:751:71285:1900189:1766:10512:10674:36…
44264	cellular polysaccharide metabolic process	14 out of 294 genes, 4.8%	70 out of 13081 background genes, 0.5%	0.00034	0	GSC1:CHS7:MNN2:CHS3:C1_14060W_A:GFA1:KRE9:CRZ1:SKN1:KRE6:BMT4:BMT3:KRE1:CHS2	36178:1900445:7329:61400:71468:30447:6281:48315:71483:6486:71260:30476:61422:6827:7121:1900436:42981:6038:1904541:1900622:44182:35269:70135:6355:2001040:9267:90529:46354:60257:97237:36170:9405:70879:920:30448:51223:61423:6078:6888:19722:71216:7163:42546:6487:34221:6031:31505:6042:61404:6457:36180:6402:34976:34217:128:1900429:35268:6075:70136:9652:35690:97301
51704	multi-organism process	51 out of 294 genes, 17.3%	641 out of 13081 background genes, 4.9%	0.00042	0	C1_00160C_A:PHR2:MOB2:VPS27:HGC1:GSC1:PDE2:KTR4:CSH1:BRG1:CHS7:OPY2:CPP1:SWE1:MNN2:C1_11250W_A:CHS3:ACT1:C1_14060W_A:RIM101:SOD5:GNA1:JEM1:MIT1:RHR2:UTR2:IRS4:SAP9:CRZ1:AAF1:UBI4:SPS20:CAS5:BGL2:SOD1:C4_03110W_A:SAP10:PHR1:CEK1:CZF1:VPS1:MID1:SAC6:ALS1:C7_00490C_A:HSE1:CRZ2:ACO1:CHS2:ZCF39:PGA1	32:90154:1410:916:36178:1320:1900439:1900445:30036:43709:200:7329:1900443:61400:45944:31579:71468:48017:10914:1900240:30447:31589:6281:7623:71701:48315:52155:43409:45454:71454:9272:60988:71280:1402:6882:70417:71483:6486:11:6468:71260:30476:45461:71467:32512:61422:34605:742:10895:51666:6816:8361:6827:7121:6114:90002:42981:1900436:30010:6673:751:7160:71285:1900189:1766:36176:6038:1904541:321:36166:…
33692	cellular polysaccharide biosynthetic process	12 out of 294 genes, 4.1%	52 out of 13081 background genes, 0.4%	0.00046	0	GSC1:CHS7:MNN2:CHS3:GFA1:KRE9:CRZ1:SKN1:KRE6:BMT3:KRE1:CHS2	36178:1900445:7329:61400:71468:30447:6281:48315:71483:6486:71260:30476:61422:6827:7121:1900436:42981:6038:1900622:44182:35269:70135:6355:2001040:9267:90529:46354:60257:97237:36170:9405:920:30448:51223:61423:6078:6888:19722:71216:7163:42546:6487:34221:6031:31505:6042:61404:6457:36180:6402:34976:34217:128:1900429:35268:6075:70136:9652:35690:97301
271	polysaccharide biosynthetic process	12 out of 294 genes, 4.1%	53 out of 13081 background genes, 0.4%	0.00058	0	GSC1:CHS7:MNN2:CHS3:GFA1:KRE9:CRZ1:SKN1:KRE6:BMT3:KRE1:CHS2	36178:1900445:7329:61400:71468:30447:6281:48315:71483:6486:71260:30476:61422:6827:7121:1900436:42981:6038:1900622:44182:35269:70135:6355:2001040:9267:90529:46354:60257:97237:36170:9405:920:30448:51223:61423:6078:6888:19722:71216:7163:42546:6487:34221:6031:31505:6042:61404:6457:36180:6402:34976:34217:128:1900429:35268:6075:70136:9652:35690:97301
16051	carbohydrate biosynthetic process	14 out of 294 genes, 4.8%	73 out of 13081 background genes, 0.6%	0.00059	0	GSC1:CHS7:MNN2:CHS3:RHR2:GFA1:KRE9:CRZ1:SKN1:KRE6:BMT3:KRE1:CHS2:INO1	6021:36178:1900445:7329:61400:71468:30447:6281:48315:71483:6486:71260:30476:61422:6827:7121:6114:1900436:42981:6038:1900622:44182:6071:35269:70135:71470:44409:6355:2001040:9267:44011:90529:8654:46354:60257:97237:36170:9405:920:30448:51223:61423:6078:6888:19722:71216:7163:42546:6487:34221:6031:31505:6042:61404:6457:36180:6402:34976:36164:34217:128:1900429:35268:6075:70136:9652:35690:97301
10383	cell wall polysaccharide metabolic process	10 out of 294 genes, 3.4%	38 out of 13081 background genes, 0.3%	0.00116	0	CHS7:CHS3:C1_14060W_A:UTR2:GFA1:CRZ1:CRH11:BMT4:BMT3:CHS2	1900445:7329:61400:71468:30447:6281:48315:71483:71260:30476:61422:7121:1900436:42981:6038:1904541:44406:1900622:44182:35269:70135:6355:2001040:9267:90529:60257:70783:36170:9405:70879:920:6037:30448:51223:61423:6888:19722:71216:7163:6487:34221:6031:31505:6042:61404:6457:36180:6402:34976:34217:128:1900429:70136:9652:35690:97301
42546	cell wall biogenesis	18 out of 294 genes, 6.1%	125 out of 13081 background genes, 1.0%	0.00129	0	ROT1:GSC1:KTR4:CHS7:DPM1:OPY2:CHS3:ACT1:C1_14060W_A:RIM101:DFG5:GFA1:KRE9:CRZ1:CEK1:BMT3:FLC2:CHS2	32:1410:36178:916:1900439:1900445:7329:61400:45944:33157:71468:10914:30447:61454:6281:48315:43409:71454:9272:71280:6458:71483:11:71260:30476:45461:30950:71467:61422:30968:7121:90002:42981:1900436:30010:751:71285:1766:6038:1904541:36244:1300:15886:43967:15883:165:1900622:44182:917:46827:35269:70135:32995:44409:1903475:6355:2001040:17157:34599:9267:10526:90529:30100:60257:71476:71507:36177:97237:36…
9405	pathogenesis	27 out of 294 genes, 9.2%	253 out of 13081 background genes, 1.9%	0.00146	0	PHR2:VPS27:GSC1:PDE2:CSH1:BRG1:CHS7:CPP1:SWE1:MNN2:CHS3:RIM101:SOD5:GNA1:MIT1:RHR2:UTR2:IRS4:CRZ1:UBI4:CAS5:BGL2:SOD1:PHR1:CEK1:SAC6:ALS1	90154:1410:36178:1320:1900439:1900445:43709:200:7329:61400:45944:71468:48017:10914:1900240:30447:31589:6281:7623:71701:43409:45454:9272:71454:71280:1402:6882:70417:71483:6486:6468:71260:30476:45461:71467:61422:34605:10895:51666:8361:6827:7121:6114:1900436:42981:751:6673:7160:71285:1900189:36176:6038:36166:36244:86:1900432:44406:165:1900622:71474:44182:917:19933:33554:51017:46827:6071:7155:16567:3…
6037	cell wall chitin metabolic process	7 out of 294 genes, 2.4%	17 out of 13081 background genes, 0.1%	0.00167	0	CHS7:CHS3:UTR2:GFA1:CRZ1:CRH11:CHS2	1900445:7329:61400:71468:30447:6281:48315:71483:71260:30476:61422:7121:1900436:42981:6038:44406:1900622:44182:6355:2001040:9267:90529:60257:70783:36170:9405:920:6037:30448:51223:61423:6888:19722:71216:7163:6487:34221:6031:31505:6042:61404:6457:36180:6402:34976:34217:128:1900429:9652:35690:97301
9272	fungal-type cell wall biogenesis	16 out of 294 genes, 5.4%	106 out of 13081 background genes, 0.8%	0.00269	0	ROT1:GSC1:KTR4:CHS7:DPM1:OPY2:CHS3:ACT1:C1_14060W_A:RIM101:DFG5:GFA1:CEK1:BMT3:FLC2:CHS2	32:1410:36178:916:1900439:1900445:45944:33157:10914:30447:61454:6281:48315:43409:71454:9272:71280:6458:11:71260:30476:45461:30950:71467:30968:90002:1900436:30010:751:71285:1766:6038:1904541:36244:1300:15886:43967:15883:165:44182:917:46827:35269:70135:32995:44409:1903475:6355:17157:34599:9267:10526:90529:30100:60257:71476:71507:36177:36171:36170:9405:71963:70879:920:75296:71469:30448:51223:44416:9…
70887	cellular response to chemical stimulus	48 out of 294 genes, 16.3%	643 out of 13081 background genes, 4.9%	0.00604	0	MOB2:ROT1:HGC1:CCH1:GSC1:PDE2:RPN4:HAC1:OPY2:CPP1:SWE1:SFU1:TPK1:CHO1:ACT1:IML2:RIM101:DFG5:SOD5:MXR1:C2_02920W_A:RTA2:DDR48:DOT5:PMC1:GFA1:GLX3:KRE9:MCA1:CRZ1:DAG7:CAS5:SOD1:C4_03110W_A:PHR1:CEK1:AUR1:GPR1:CCN1:PCL1:MID1:C6_00850W_A:SAC6:SSR1:PGA23:CR_06560C_A:CRZ2:PTP3	32878:71243:90154:1410:916:36178:1320:1900439:1900445:51726:43709:200:7329:61400:45944:31579:30011:71468:10914:15908:1900240:30447:31589:6281:7623:71701:48315:55085:43409:45454:71454:9272:71280:1402:6882:70417:6458:16239:71483:46519:11:6468:30476:71260:45461:30950:71467:61422:6659:32512:34605:10895:51666:30968:71333:8361:6816:7121:90002:10972:42981:1900436:30010:6673:751:71285:1900189:1766:10512:…
22610	biological adhesion	14 out of 294 genes, 4.8%	88 out of 13081 background genes, 0.7%	0.00607	0	PDE2:CSH1:RHR2:UTR2:IRS4:SAP9:AAF1:BGL2:C4_02260C_A:SAP10:PHR1:ALS1:DFI1:PGA1	36178:43709:48017:1900240:30447:31589:52155:1402:71467:6114:7160:36176:36244:1900432:44406:44182:19933:6071:7155:71470:44409:22604:6355:6914:43689:9267:44011:9651:70783:16337:6508:36170:71244:44407:9405:30260:1900735:6037:30448:5975:44114:44416:43710:71216:48869:1900435:31505:44117:36168:36180:36164:1900429:71432:7009:16485:35690:6878
9607	response to biotic stimulus	29 out of 294 genes, 9.9%	305 out of 13081 background genes, 2.3%	0.00615	0	MOB2:HGC1:PDE2:BRG1:FGR6-3:CPP1:MNN2:CHO1:RIM101:DFG5:SOD5:FGR22:DDR48:FGR6-4:IRS4:SAP9:PEP8:KRE9:CRZ1:ECM29:FGR6-10:CEK1:CZF1:GPR1:CCN1:ALS1:ACO1:RTA4:ZCF39	1410:36178:1900439:1900445:51726:43709:200:7329:1900443:61400:45944:31579:30011:71468:48017:10914:1900240:30447:6281:71701:52155:43409:9272:71454:71280:1402:71483:6486:71260:45461:71467:61422:6659:34605:71333:6827:7121:1900436:42981:751:71285:1900189:10512:36176:43248:6038:321:36166:36244:1900432:71554:44406:1900239:165:1900622:44182:2:917:19933:9745:33554:46827:7155:71451:44409:82:9731:22604:108…
44036	cell wall macromolecule metabolic process	12 out of 294 genes, 4.1%	66 out of 13081 background genes, 0.5%	0.00683	0	KTR4:CHS7:MNN2:CHS3:C1_14060W_A:UTR2:GFA1:CRZ1:CRH11:BMT4:BMT3:CHS2	32:36178:1900445:7329:61400:71468:30447:6281:48315:9272:71483:6486:71260:30476:61422:6827:7121:1900436:42981:6038:1904541:44406:1900622:44182:35269:70135:6355:2001040:9267:90529:46354:60257:70783:36170:9405:70879:920:6037:30448:51223:61423:6888:19722:71216:7163:6487:34221:6031:31505:6042:61404:6457:36180:6402:34976:909:34217:128:1900429:35268:70136:9652:35690:97301
51716	cellular response to stimulus	85 out of 294 genes, 28.9%	1412 out of 13081 background genes, 10.8%	0.00817	0	PHR2:MOB2:ROT1:HGC1:CCH1:C1_01390C_A:CRL1:C1_02380C_A:GSC1:PDE2:KTR4:RPN4:TUS1:BRG1:SIP5:HAC1:FGR6-3:OPY2:CPP1:SWE1:SFU1:TPK1:MNN2:CHO1:CHS3:ACT1:IML2:RIM101:DFG5:SOD5:RFC5:MXR1:FGR22:C2_02920W_A:RTA2:JEM1:C2_08950W_A:DDR48:FGR6-4:RHR2:DOT5:PMC1:GFA1:GLX3:IRS4:SAP9:PEP8:KRE9:MCA1:CRZ1:ECM29:UBI4:DAG7:CAS5:SOD1:C4_02720C_A:C4_03110W_A:PHR1:OMA1:FGR6-10:CEK1:CZF1:C4_07220C_A:AUR1:GPR1:CCN1:PCL1:MID…	32:90154:1410:7329:1900443:45944:33157:15908:1900240:30447:61454:31589:6281:71701:48315:55085:71475:43409:9272:1402:6882:70417:6458:16239:71483:46519:11:45461:30950:15031:742:6807:51666:30968:8361:6827:7121:10972:6673:71285:10512:10674:36176:43248:70588:6038:1900239:44182:34975:917:9745:46827:6071:7155:31929:19676:320:32995:71470:35023:71451:90038:32513:9731:22604:2001040:6914:1990264:6812:7266:3…
44182	filamentous growth of a population of unicellular organisms	38 out of 294 genes, 12.9%	466 out of 13081 background genes, 3.6%	0.00872	0	MOB2:HGC1:PDE2:BRG1:CHS7:FGR6-3:CPP1:TPK1:MNN2:CHO1:RIM101:DFG5:FGR22:DFG10:DDR48:FGR6-4:UTR2:IRS4:PEP8:KRE9:CRZ1:ECM29:UBI4:SOD1:PHR1:FGR6-10:CEK1:CZF1:VPS1:GPR1:CCN1:PCL1:ALS1:LAG1:PGA13:RTA4:ZCF39:PGA1	1410:7329:1900443:45944:1900240:30447:31589:6281:71701:43409:9272:1402:6882:16239:71483:45461:6827:7121:71285:10512:36176:43248:6038:1900239:44182:917:9745:46827:7155:9731:22604:2001040:6914:34599:10526:46354:60257:1934:754:71507:36177:9651:97237:70783:16337:16559:9405:1900735:75296:6037:70887:51223:9372:6801:1901856:44416:43710:6888:19722:1900231:1990277:902:46777:1900444:35146:19408:70317:60237…
44764	multi-organism cellular process	26 out of 294 genes, 8.8%	264 out of 13081 background genes, 2.0%	0.01015	0	C1_00160C_A:MOB2:HGC1:PDE2:CSH1:BRG1:OPY2:CPP1:C1_11250W_A:C1_14060W_A:JEM1:RHR2:SAP9:CAS5:BGL2:C4_03110W_A:PHR1:CEK1:CZF1:VPS1:MID1:ALS1:C7_00490C_A:CRZ2:ZCF39:PGA1	1900443:45944:1900240:30447:31589:48315:71701:43409:9272:1402:70417:45461:742:36176:1904541:7019:1900239:44182:34975:46827:6071:7155:71470:22604:6812:10526:1934:754:10570:747:71507:9651:45332:16337:6508:16559:9405:1900735:70879:743:75296:31578:9372:44416:30433:51315:43710:33566:1900231:1990277:46777:1900444:35146:60237:7231:33246:6457:36168:36164:30989:71432:7009:6470:16485:122:1403:30866:6357:68…
90609	single-species submerged biofilm formation	17 out of 294 genes, 5.8%	131 out of 13081 background genes, 1.0%	0.01078	0	C1_00160C_A:MOB2:HGC1:PDE2:CSH1:BRG1:RHR2:CAS5:BGL2:PHR1:CZF1:VPS1:ALS1:C7_00490C_A:CRZ2:ZCF39:PGA1	1900443:45944:1900240:30447:31589:70417:36176:1900239:44182:6071:7155:71470:22604:1934:9651:16337:16559:9405:1900735:9372:44416:43710:1900231:36168:36164:7009:122:30866:6357:6878:36178:1900445:30036:43709:31579:71468:71280:60988:71467:10895:6114:7160:1900189:321:36166:36244:1900432:44406:71474:19933:44409:10811:6355:43689:9267:44011:2181:79:1900233:36170:71244:44407:30260:920:30448:5975:44114:712…
44406	adhesion of symbiont to host	10 out of 294 genes, 3.4%	48 out of 13081 background genes, 0.4%	0.01143	0	PDE2:UTR2:IRS4:SAP9:AAF1:BGL2:SAP10:PHR1:ALS1:PGA1	1900240:30447:31589:1402:36176:44182:7155:22604:6914:9651:70783:16337:6508:9405:1900735:6037:44416:43710:36168:36164:71432:7009:16485:6878:36178:43709:48017:52155:71467:36244:1900432:44406:19933:44409:6355:43689:9267:44011:36170:71244:44407:30260:30448:5975:44114:71216:48869:1900435:31505:44117:36180:1900429:35690
90605	submerged biofilm formation	17 out of 294 genes, 5.8%	134 out of 13081 background genes, 1.0%	0.01462	0	C1_00160C_A:MOB2:HGC1:PDE2:CSH1:BRG1:RHR2:CAS5:BGL2:PHR1:CZF1:VPS1:ALS1:C7_00490C_A:CRZ2:ZCF39:PGA1	1900443:45944:1900240:30447:31589:70417:36176:1900239:44182:6071:7155:71470:22604:1934:9651:16337:16559:9405:1900735:9372:44416:43710:1900231:36168:36164:7009:122:30866:6357:6878:36178:1900445:30036:43709:31579:71468:71280:60988:71467:10895:6114:7160:1900189:321:36166:36244:1900432:44406:71474:19933:44409:10811:6355:43689:9267:44011:2181:79:1900233:36170:71244:44407:30260:920:30448:5975:44114:712…
6040	amino sugar metabolic process	8 out of 294 genes, 2.7%	31 out of 13081 background genes, 0.2%	0.01648	0	CHS7:CHS3:GNA1:UTR2:GFA1:CRZ1:CRH11:CHS2	7329:30447:6281:48315:71483:7121:6038:44182:2001040:90529:60257:70783:9405:6037:51223:6888:19722:6031:6042:6457:9652:97301:1900445:61400:71468:71260:30476:61422:1900436:42981:44406:1900622:6355:9267:36170:920:30448:61423:71216:7163:6487:34221:31505:61404:36180:6402:34976:34217:128:1900429:6048:35690
6022	aminoglycan metabolic process	7 out of 294 genes, 2.4%	23 out of 13081 background genes, 0.2%	0.01724	0	CHS7:CHS3:UTR2:GFA1:CRZ1:CRH11:CHS2	7329:30447:6281:48315:71483:7121:6038:44182:2001040:90529:60257:70783:9405:6037:51223:6888:19722:6031:6042:6457:9652:97301:1900445:61400:71468:71260:30476:61422:1900436:42981:44406:1900622:6355:9267:36170:920:30448:61423:71216:7163:6487:34221:31505:61404:36180:6402:34976:34217:128:1900429:35690
6030	chitin metabolic process	7 out of 294 genes, 2.4%	23 out of 13081 background genes, 0.2%	0.01724	0	CHS7:CHS3:UTR2:GFA1:CRZ1:CRH11:CHS2	7329:30447:6281:48315:71483:7121:6038:44182:2001040:90529:60257:70783:9405:6037:51223:6888:19722:6031:6042:6457:9652:97301:1900445:61400:71468:71260:30476:61422:1900436:42981:44406:1900622:6355:9267:36170:920:30448:61423:71216:7163:6487:34221:31505:61404:36180:6402:34976:34217:128:1900429:35690
44010	single-species biofilm formation	17 out of 294 genes, 5.8%	136 out of 13081 background genes, 1.0%	0.01782	0	C1_00160C_A:MOB2:HGC1:PDE2:CSH1:BRG1:RHR2:CAS5:BGL2:PHR1:CZF1:VPS1:ALS1:C7_00490C_A:CRZ2:ZCF39:PGA1	1900443:45944:1900240:30447:31589:70417:36176:1900239:44182:6071:7155:71470:22604:1934:9651:16337:16559:9405:1900735:9372:44416:43710:1900231:36168:36164:7009:122:30866:6357:6878:36178:1900445:30036:43709:31579:71468:71280:60988:71467:10895:6114:7160:1900189:321:36166:36244:1900432:44406:71474:19933:44409:10811:6355:43689:9267:44011:2181:79:1900233:36170:71244:44407:30260:920:30448:5975:44114:712…
44403	symbiosis, encompassing mutualism through parasitism	16 out of 294 genes, 5.4%	127 out of 13081 background genes, 1.0%	0.02851	0	HGC1:PDE2:RIM101:SOD5:RHR2:UTR2:IRS4:SAP9:AAF1:CAS5:BGL2:SAP10:PHR1:ALS1:ACO1:PGA1	1410:45944:1900240:30447:31589:9272:1402:70417:71285:36176:44182:917:6071:7155:71470:71451:22604:6914:34599:36177:9651:70783:16337:6508:9405:1900735:6037:6801:44416:43710:30437:36168:36164:71432:7009:16485:122:6357:6878:36178:1900439:1900445:43709:48017:52155:71454:71280:71467:10895:6114:1900189:321:36244:1900432:44406:71474:2:19933:44409:10811:6355:43689:9267:44011:79:36171:36170:71244:44407:302…
71260	cellular response to mechanical stimulus	4 out of 294 genes, 1.4%	6 out of 13081 background genes, 0.0%	0.03049	0	CCH1:CHS3:CRZ1:MID1	7329:30447:6281:48315:55085:71483:7121:6038:2001040:747:9405:19722:9652:97301:1900445:61400:71468:30476:71260:61422:32512:6816:1900436:42981:1900622:98703:6355:48543:9267:36170:30448:61423:1901196:71216:31505:61404:9826:36180:6402:34976:35690
5975	carbohydrate metabolic process	23 out of 294 genes, 7.8%	233 out of 13081 background genes, 1.8%	0.0322	0	PHR2:GSC1:CHS7:MNN2:C1_11080W_A:CHS3:C1_14060W_A:RHR2:UTR2:GFA1:KRE9:CRZ1:SKN1:KRE6:BGL2:CRH11:PHR1:GPD2:BMT4:BMT3:KRE1:CHS2:INO1	7329:30447:31589:6281:48315:71483:6827:7121:6038:1904541:44182:6071:6003:71470:2001040:90529:46354:60257:9651:97237:70783:9405:70879:6037:51223:6888:19722:6031:6042:6457:6110:36164:6000:6075:9652:97301:6021:36178:1900445:61400:71468:6486:71260:30476:71467:61422:6114:1900436:42981:44406:1900622:35269:70135:44409:6355:9267:46168:44011:8654:6342:36170:44407:920:30448:5975:44114:61423:6078:55114:7121…
44419	interspecies interaction between organisms	16 out of 294 genes, 5.4%	129 out of 13081 background genes, 1.0%	0.03467	0	HGC1:PDE2:RIM101:SOD5:RHR2:UTR2:IRS4:SAP9:AAF1:CAS5:BGL2:SAP10:PHR1:ALS1:ACO1:PGA1	1410:45944:1900240:30447:31589:9272:1402:70417:71285:36176:44182:917:6071:7155:71470:71451:22604:6914:34599:36177:9651:70783:16337:6508:9405:1900735:6037:6801:44416:43710:30437:36168:36164:71432:7009:16485:122:6357:6878:36178:1900439:1900445:43709:48017:52155:71454:71280:71467:10895:6114:1900189:321:36244:1900432:44406:71474:2:19933:44409:10811:6355:43689:9267:44011:79:36171:36170:71244:44407:302…
42710	biofilm formation	17 out of 294 genes, 5.8%	144 out of 13081 background genes, 1.1%	0.03775	0	C1_00160C_A:MOB2:HGC1:PDE2:CSH1:BRG1:RHR2:CAS5:BGL2:PHR1:CZF1:VPS1:ALS1:C7_00490C_A:CRZ2:ZCF39:PGA1	1900443:45944:1900240:30447:31589:70417:36176:1900239:44182:6071:7155:71470:22604:1934:9651:16337:16559:9405:1900735:9372:44416:43710:1900231:36168:36164:7009:122:30866:6357:6878:36178:1900445:30036:43709:31579:71468:71280:60988:71467:10895:6114:7160:1900189:321:36166:36244:1900432:44406:71474:19933:44409:10811:6355:43689:9267:44011:2181:79:1900233:36170:71244:44407:30260:920:30448:5975:44114:712…
50896	response to stimulus	90 out of 294 genes, 30.6%	1580 out of 13081 background genes, 12.1%	0.03784	0	PHR2:MOB2:ROT1:HGC1:CCH1:C1_01390C_A:CRL1:C1_02380C_A:GSC1:PDE2:KTR4:RPN4:TUS1:BRG1:SIP5:HAC1:FGR6-3:OPY2:C1_09220W_A:CPP1:SWE1:SFU1:TPK1:MNN2:CHO1:CHS3:ACT1:IML2:RIM101:DFG5:SOD5:RFC5:MXR1:FGR22:C2_02920W_A:RTA3:RTA2:JEM1:C2_08950W_A:DDR48:FGR6-4:RHR2:DOT5:PMC1:GFA1:GLX3:IRS4:SAP9:PEP8:KRE9:WSC1:MCA1:CRZ1:ECM29:UBI4:DAG7:CAS5:SOD1:C4_02720C_A:C4_03110W_A:PHR1:OMA1:FGR6-10:CEK1:CZF1:C4_07220C_A:A…	32:90154:1410:7329:1900443:45944:33157:15908:1900240:30447:61454:31589:6281:71701:48315:55085:71475:43409:9272:1402:6882:70417:6458:16239:71483:46519:11:45461:30950:15031:742:6807:51666:30968:8361:6827:7121:10972:199:6673:71285:10512:10674:36176:43248:70588:6038:1900239:44182:34975:917:9745:46827:6071:7155:31929:19676:320:32995:71470:35023:71451:90038:32513:9731:22604:2001040:6914:1990264:6812:72…
7154	cell communication	42 out of 294 genes, 14.3%	576 out of 13081 background genes, 4.4%	0.04351	0	MOB2:ROT1:CCH1:CRL1:C1_02380C_A:PDE2:KTR4:TUS1:BRG1:SIP5:HAC1:FGR6-3:OPY2:CPP1:MNN2:CHO1:RIM101:FGR22:DDR48:FGR6-4:GLX3:IRS4:SAP9:PEP8:CRZ1:ECM29:C4_02720C_A:OMA1:FGR6-10:CEK1:CZF1:GPR1:MID1:RCN1:WSC2:SAC7:CR_01720W_A:GLN1:CR_06560C_A:CHS2:RTA4:PTP3	32:1410:7329:1900443:45944:1900240:30447:6281:71701:48315:55085:43409:9272:1402:6458:71483:45461:30950:15031:1990854:6807:30968:6827:7121:10972:71285:10512:10674:36176:43248:6038:1900239:44182:917:9745:46827:31929:19676:35023:90038:32513:9731:22604:2001040:6914:1990264:7266:34599:10526:90529:46354:1934:754:747:71507:36177:6508:90338:9405:75296:70887:9372:19243:44416:43547:19722:1900231:1990277:46…
44011	single-species biofilm formation on inanimate substrate	15 out of 294 genes, 5.1%	119 out of 13081 background genes, 0.9%	0.05032	0	C1_00160C_A:MOB2:HGC1:CSH1:BRG1:RHR2:CAS5:BGL2:PHR1:CZF1:VPS1:ALS1:C7_00490C_A:CRZ2:ZCF39	1900443:45944:30447:31589:70417:1900239:44182:6071:7155:71470:1934:9651:16337:16559:9405:1900735:9372:44416:43710:1900231:36164:122:30866:6357:6878:36178:1900445:43709:30036:31579:71468:71280:60988:71467:10895:6114:7160:1900189:321:36166:36244:44406:71474:44409:10811:6355:43689:9267:44011:2181:79:1900233:36170:44407:30260:920:30448:5975:44114:71216:1900241:1900442:7163:45053:31505:18016:6623:4411…
51703	intraspecies interaction between organisms	15 out of 294 genes, 5.1%	119 out of 13081 background genes, 0.9%	0.05032	0	C1_00160C_A:MOB2:HGC1:CSH1:BRG1:RHR2:CAS5:BGL2:PHR1:CZF1:VPS1:ALS1:C7_00490C_A:CRZ2:ZCF39	1900443:45944:30447:31589:70417:1900239:44182:6071:7155:71470:1934:9651:16337:16559:9405:1900735:9372:44416:43710:1900231:36164:122:30866:6357:6878:36178:1900445:43709:30036:31579:71468:71280:60988:71467:10895:6114:7160:1900189:321:36166:36244:44406:71474:44409:10811:6355:43689:9267:44011:2181:79:1900233:36170:44407:30260:920:30448:5975:44114:71216:1900241:1900442:7163:45053:31505:18016:6623:4411…
44262	cellular carbohydrate metabolic process	16 out of 294 genes, 5.4%	134 out of 13081 background genes, 1.0%	0.05552	0.0005	GSC1:CHS7:MNN2:CHS3:C1_14060W_A:RHR2:GFA1:KRE9:CRZ1:SKN1:KRE6:BMT4:BMT3:KRE1:CHS2:INO1	7329:30447:6281:48315:71483:6827:7121:6038:1904541:44182:6071:71470:2001040:90529:46354:60257:97237:9405:70879:51223:6888:19722:6031:6042:6457:36164:6075:9652:97301:6021:36178:1900445:61400:71468:6486:71260:30476:61422:6114:1900436:42981:1900622:35269:70135:44409:6355:9267:44011:8654:36170:920:30448:61423:6078:71216:7163:42546:6487:34221:31505:61404:36180:6402:34976:34217:128:1900429:35268:70136:…
46349	amino sugar biosynthetic process	6 out of 294 genes, 2.0%	19 out of 13081 background genes, 0.1%	0.05591	0.0005	CHS7:CHS3:GNA1:GFA1:CRZ1:CHS2	7329:30447:6281:48315:71483:7121:6038:44182:2001040:90529:60257:9405:51223:6888:19722:6031:6042:6457:9652:97301:1900445:61400:71468:71260:30476:61422:1900436:42981:1900622:6355:9267:36170:920:30448:61423:71216:7163:6487:34221:31505:61404:36180:6402:34976:34217:128:1900429:6048:35690
32512	regulation of protein phosphatase type 2B activity	3 out of 294 genes, 1.0%	3 out of 13081 background genes, 0.0%	0.05628	0.0004	CCH1:MID1:RCN1	48315:55085:32513:747:19722:71260:32512:6816:98703:33554:48543:30448:1901196:31505:9826:35690
9605	response to external stimulus	34 out of 294 genes, 11.6%	433 out of 13081 background genes, 3.3%	0.05833	0.0004	MOB2:CCH1:PDE2:KTR4:BRG1:SIP5:FGR6-3:CPP1:MNN2:CHO1:CHS3:RIM101:SOD5:FGR22:DDR48:FGR6-4:GLX3:IRS4:SAP9:PEP8:CRZ1:ECM29:SOD1:FGR6-10:CEK1:CZF1:GPR1:MID1:ALS1:GLN1:ACO1:CHS2:RTA4:PTP3	32:1410:7329:1900443:45944:1900240:30447:6281:71701:48315:55085:43409:9272:1402:6882:71483:45461:6807:6827:7121:10972:71285:10512:36176:43248:6038:1900239:44182:917:9745:46827:7155:19676:71451:9731:22604:2001040:6914:1990264:34599:10526:90529:46354:1934:754:747:71507:36177:16337:6508:9405:1900735:75296:70887:9372:19243:6801:1901856:44416:43710:19722:1900231:1990277:46777:42149:1900444:35146:70317…
48583	regulation of response to stimulus	27 out of 294 genes, 9.2%	312 out of 13081 background genes, 2.4%	0.0694	0.0017	MOB2:HGC1:CCH1:PDE2:RPN4:TUS1:OPY2:C1_09320C_A:CPP1:TPK1:AKR1:RIM101:SAP9:WSC1:CRZ1:CEK1:CZF1:GPR1:CCN1:MID1:C6_02090C_A:ALS1:SAC7:CR_01720W_A:ACO1:ZCF39:PTP3	1410:7329:1900443:45944:1900240:30447:6281:71701:48315:55085:43409:9272:1402:71483:45461:1990854:7121:10972:199:71285:36176:6038:1900239:44182:917:9745:46827:7155:35023:90038:9731:22604:2001040:1990264:10526:61395:30100:1934:754:747:71507:36177:16337:6508:9405:1900735:75296:6282:70887:9372:32436:44416:43547:43710:19722:1900231:1990277:902:46777:1900444:35146:90334:6950:35024:60237:30437:7231:3324…
1901071	glucosamine-containing compound metabolic process	7 out of 294 genes, 2.4%	29 out of 13081 background genes, 0.2%	0.08984	0.0017	CHS7:CHS3:UTR2:GFA1:CRZ1:CRH11:CHS2	7329:30447:6281:48315:71483:7121:6038:44182:2001040:90529:60257:70783:9405:6037:51223:6888:19722:6031:6042:6457:9652:97301:1900445:61400:71468:71260:30476:61422:1900436:42981:44406:1900622:6355:9267:36170:920:30448:61423:71216:7163:6487:34221:31505:61404:36180:6402:34976:34217:128:1900429:35690

## Sheet: 3. GO process - DOWN genes
GO processes of all genes with decreased RNA PolII occupancy in the wild type strain in response to caspofungin.
GOID	GO term	Cluster frequency	Background frequency	Corrected P-value	False discovery rate	Gene(s) annotated to the term	Directly Annotated GOID List
55114	oxidation-reduction process	37 out of 252 genes, 14.7%	418 out of 13081 background genes, 3.2%	3.19e-05	0	C1_01360C_A:GOR1:ERG3:RIB3:OSM2:SOD4:MET1:ALD5:DLD1:CDC19:ECM17:C2_08100W_A:ARA1:MET10:ACS1:TDH3:TPI1:ERG251:FRE10:CFL1:GDH3:SOU1:PDC11:MET14:ERG11:C5_04120C_A:FET34:FET31:EBP1:MAE1:SOD3:C7_00430W_A:GAC1:PRX1:GSY1:GLK1:FRE7	6096:9060:6006:51701:44262:15677:61621:33215:51156:30447:9231:6013:6801:6002:44416:45454:103:6116:46443:5978:10106:55114:71216:6520:6559:6537:71281:19379:36187:8152:304:6827:44859:19413:97:7160:19654:1766:949:6915:6085:46686:6090:19752:44406:19660:7094:46323:44182:5977:34975:36180:909:19430:71451:6696:7126:19655:9436:52059:19354:42866:2000377:43065:34599:9267:9086:16573:34755:6826:46688:9408:4285…
6090	pyruvate metabolic process	10 out of 252 genes, 4.0%	33 out of 13081 background genes, 0.3%	6.25e-05	0	GPM1:CDC19:TDH3:TPI1:PYC2:PDC11:PGK1:MAE1:PGI1:GLK1	6096:6006:30448:51701:61621:51156:30447:6013:6002:44416:48315:55114:71216:6520:6559:42149:6094:7163:8152:15976:7160:949:6915:51211:6090:44406:19660:46323:36180:19655:42866:9267:6098:9408:46835:1678:36170:6108:6569:72593
6006	glucose metabolic process	9 out of 252 genes, 3.6%	27 out of 13081 background genes, 0.2%	0.00011	0	GPM1:CDC19:TDH3:TPI1:PYC2:PDC11:PGK1:PGI1:GLK1	6096:6006:30448:51701:61621:51156:30447:6013:6002:44416:48315:55114:71216:6559:42149:6094:7163:8152:15976:7160:949:6915:51211:6090:44406:19660:46323:36180:19655:42866:9267:6098:9408:46835:1678:36170:6569:72593
6096	glycolytic process	7 out of 252 genes, 2.8%	17 out of 13081 background genes, 0.1%	0.00057	0	GPM1:CDC19:TDH3:TPI1:PGK1:PGI1:GLK1	6096:6006:30448:51701:61621:51156:30447:6013:6002:44416:48315:55114:71216:6094:7163:8152:7160:6915:51211:44406:19660:46323:36180:42866:9267:6098:46835:1678:36170:72593
6757	ATP generation from ADP	7 out of 252 genes, 2.8%	17 out of 13081 background genes, 0.1%	0.00057	0	GPM1:CDC19:TDH3:TPI1:PGK1:PGI1:GLK1	6096:6006:30448:51701:61621:51156:30447:6013:6002:44416:48315:55114:71216:6094:7163:8152:7160:6915:51211:44406:19660:46323:36180:42866:9267:6098:46835:1678:36170:72593
44710	single-organism metabolic process	78 out of 252 genes, 31.0%	1390 out of 13081 background genes, 10.6%	0.00058	0	C1_01360C_A:C1_02220C_A:CWH8:SNO1:GOR1:XOG1:PDR16:ERG3:PEX3:SAM4:C1_08490W_A:DAK2:RIB3:OSM2:ARO8:SOD4:ERG28:PLB4.5:ARO3:MET1:ALD5:DLD1:GPM1:CDC19:ECM17:C2_07440C_A:C2_08100W_A:ARA1:MET10:ACS1:TPS3:C3_00170C_A:DAL1:PMA1:ERG6:C3_03680W_A:TDH3:BMT1:TPI1:AAT22:ERG251:C4_02420C_A:VTC4:PYC2:FRE10:LYS1:CFL1:GDH3:SOU1:PDC11:MET14:ERG11:URA4:C5_04120C_A:FET34:FET31:PGK1:FAD2:EBP1:C6_01370W_A:MAE1:PLB1:C6_…	6096:43936:16237:32581:6006:916:45046:71210:19284:6636:51701:44262:33215:9231:30447:6002:31589:48315:55085:16126:45454:6754:6116:6520:8615:6559:15914:6145:9442:19379:43066:34605:8152:6073:6827:44859:15976:7160:51453:1766:34354:6038:43942:46686:1904541:1900432:6090:44406:19660:7094:44182:5977:34975:6071:35269:70135:71451:46148:6696:42823:42866:6812:8610:34599:9267:44011:7264:16573:90529:8654:6098:…
5975	carbohydrate metabolic process	24 out of 252 genes, 9.5%	233 out of 13081 background genes, 1.8%	0.00068	0	C1_01360C_A:XOG1:DAK2:GPM1:CDC19:ARA1:TPS3:TDH3:BMT1:TPI1:PYC2:SOU1:PDC11:SCW11:C5_04120C_A:PGK1:C6_02420W_A:GAC1:CHS1:GSY1:PGI1:GLK1:GLK4:CHT3	6096:43936:6006:916:51701:44262:30447:6002:31589:48315:6559:6032:8152:6073:15976:7160:6038:1904541:6090:44406:19660:7094:5977:6071:35269:70135:42866:9267:44011:282:90529:6098:42850:97237:46835:1678:36170:6569:9405:44407:70879:920:30448:5975:34478:61621:51156:6013:44416:5978:55114:71216:42149:6094:7163:31505:949:6915:51211:19752:46323:36180:36164:7126:19655:70136:5992:9408:19310:72593:35690
46031	ADP metabolic process	8 out of 252 genes, 3.2%	25 out of 13081 background genes, 0.2%	0.00084	0	GPM1:CDC19:TDH3:TPI1:PDC11:PGK1:PGI1:GLK1	6096:6006:51701:30447:6002:48315:6559:8152:7160:44406:19660:42866:9267:6098:46835:1678:36170:6569:30448:61621:51156:6013:44416:55114:71216:6094:7163:949:6915:51211:46323:36180:19655:72593
44699	single-organism process	148 out of 252 genes, 58.7%	3318 out of 13081 background genes, 25.4%	0.00089	0	CDC5:C1_01300W_A:C1_01360C_A:C1_02220C_A:CWH8:SNO1:GOR1:XOG1:ENG1:PDR16:SYG1:ERG3:ZCF2:CYK3:C1_06700W_A:GAP4:PEX3:CDR4:SAM4:C1_08490W_A:TPO3:MSN4:DAK2:C1_10360C_A:FGR41:ALP1:HAP43:CDC6:RIB3:CDC54:TYE7:HSP70:ROB1:OSM2:RBE1:FTR1:ARO8:SOD4:HGT7:HGT8:HGT6:ERG28:CHA1:PLB4.5:AMN1:ARO3:MET1:ALD5:DLD1:GPM1:CDC19:ECM17:CDC46:GIT1:DBF2:FRP3:MCM3:C2_07440C_A:SIT1:C2_08100W_A:ARA1:DSE1:MET10:KIP2:ACS1:ASH1:T…	16237:32581:6974:6006:15749:19284:6279:15794:45944:1900443:6043:15891:33215:31939:30447:6002:45991:31589:48315:55085:16126:32463:1902542:1402:6116:89:71483:36289:32955:8615:15914:6847:30174:43066:93:15031:8361:6827:6046:10972:32187:36176:45732:6038:43942:6893:73:1904541:6090:15758:19660:6334:44182:34975:917:727:6071:46827:7155:71470:71451:42823:61409:280:61402:6351:61403:10696:30466:6812:8610:345…
6826	iron ion transport	7 out of 252 genes, 2.8%	19 out of 13081 background genes, 0.1%	0.00141	0	FTR1:SIT1:FRE10:CFL1:FET34:CTR1:C7_00430W_A	15891:33215:6827:1901684:9405:15677:46688:6825:36170:35434:10106:55114:71281:44117:36180:34755:6826:44718:42928:35690
9135	purine nucleoside diphosphate metabolic process	8 out of 252 genes, 3.2%	27 out of 13081 background genes, 0.2%	0.00164	0	GPM1:CDC19:TDH3:TPI1:PDC11:PGK1:PGI1:GLK1	6006:30447:6002:48315:19660:6098:46835:1678:44416:6915:19655:6096:51701:6559:8152:7160:44406:42866:9267:36170:6569:30448:61621:51156:6013:55114:71216:6094:7163:949:51211:46323:36180:72593
9179	purine ribonucleoside diphosphate metabolic process	8 out of 252 genes, 3.2%	27 out of 13081 background genes, 0.2%	0.00164	0	GPM1:CDC19:TDH3:TPI1:PDC11:PGK1:PGI1:GLK1	6006:30447:6002:48315:19660:6098:46835:1678:44416:6915:19655:6096:51701:6559:8152:7160:44406:42866:9267:36170:6569:30448:61621:51156:6013:55114:71216:6094:7163:949:51211:46323:36180:72593
19318	hexose metabolic process	10 out of 252 genes, 4.0%	46 out of 13081 background genes, 0.4%	0.00188	0	GPM1:CDC19:TDH3:TPI1:PYC2:SOU1:PDC11:PGK1:PGI1:GLK1	6006:30447:6002:48315:6090:19660:6098:46835:1678:44416:42149:6915:19655:9408:6096:51701:6559:8152:15976:7160:44406:42866:9267:42850:36170:6569:30448:61621:51156:6013:55114:71216:6094:7163:949:51211:46323:36180:72593
44281	small molecule metabolic process	50 out of 252 genes, 19.8%	770 out of 13081 background genes, 5.9%	0.00206	0	C1_02220C_A:SNO1:GOR1:ERG3:PEX3:SAM4:C1_08490W_A:DAK2:RIB3:OSM2:ARO8:ERG28:ARO3:MET1:ALD5:GPM1:CDC19:ECM17:C2_08100W_A:ARA1:ACS1:C3_00170C_A:DAL1:PMA1:ERG6:C3_03680W_A:TDH3:TPI1:AAT22:ERG251:VTC4:PYC2:LYS1:GDH3:SOU1:PDC11:MET14:ERG11:URA4:C5_04120C_A:PGK1:FAD2:MAE1:C6_02420W_A:MET2:VTC3:ADE6:ADE13:PGI1:GLK1	16237:32581:6006:19284:30447:6002:48315:55085:6116:8615:43066:6090:19660:44182:34975:6071:42823:6812:6098:97237:46835:1678:9405:44208:9060:9073:6631:2000769:44416:19878:103:19722:6537:42149:36187:19413:97:6970:6665:6221:6915:6085:19752:36164:9058:19655:50667:9436:19354:2000377:43065:8104:9408:6106:6797:70814:6096:43936:45046:71210:6636:51701:44262:9231:6754:6520:6559:6145:9442:19379:8152:44859:15…
44723	single-organism carbohydrate metabolic process	20 out of 252 genes, 7.9%	185 out of 13081 background genes, 1.4%	0.00285	0	C1_01360C_A:XOG1:DAK2:GPM1:CDC19:TPS3:TDH3:BMT1:TPI1:PYC2:SOU1:PDC11:C5_04120C_A:PGK1:C6_02420W_A:GAC1:CHS1:GSY1:PGI1:GLK1	6006:30447:6002:31589:48315:6038:1904541:6090:19660:6071:90529:6098:97237:46835:1678:9405:70879:44416:5978:42149:6915:36164:19655:5992:9408:6096:43936:916:51701:6559:8152:6073:15976:7160:44406:7094:5977:35269:70135:42866:9267:44011:42850:36170:6569:44407:30448:34478:61621:51156:6013:55114:71216:6094:7163:31505:949:51211:46323:36180:7126:70136:19310:72593:35690
72524	pyridine-containing compound metabolic process	12 out of 252 genes, 4.8%	71 out of 13081 background genes, 0.5%	0.00302	0	C1_02220C_A:SNO1:C1_08490W_A:GPM1:CDC19:C2_08100W_A:TDH3:TPI1:PDC11:PGK1:PGI1:GLK1	6006:30447:6002:48315:6116:8615:43066:19660:42823:6098:46835:1678:44416:6915:19655:2000377:43065:6096:51701:6559:8152:7160:34354:44406:42866:9267:36170:6569:46496:30448:61621:51156:6013:55114:71216:6094:7163:304:949:51211:46323:36180:72593
6165	nucleoside diphosphate phosphorylation	7 out of 252 genes, 2.8%	21 out of 13081 background genes, 0.2%	0.00308	0	GPM1:CDC19:TDH3:TPI1:PGK1:PGI1:GLK1	6006:30447:6002:48315:19660:6098:46835:1678:44416:6915:6096:51701:8152:7160:44406:42866:9267:36170:30448:61621:51156:6013:55114:71216:6094:7163:51211:46323:36180:72593
6082	organic acid metabolic process	34 out of 252 genes, 13.5%	447 out of 13081 background genes, 3.4%	0.00412	0	GOR1:ERG3:PEX3:SAM4:C1_08490W_A:ARO8:ARO3:MET1:ALD5:GPM1:CDC19:ECM17:ARA1:ACS1:C3_00170C_A:C3_03680W_A:TDH3:TPI1:AAT22:ERG251:VTC4:PYC2:LYS1:GDH3:PDC11:MET14:PGK1:FAD2:MAE1:MET2:VTC3:ADE13:PGI1:GLK1	16237:32581:6006:19284:30447:6002:48315:6090:19660:44182:6098:46835:1678:9405:44208:9073:6631:2000769:44416:19878:103:19722:6537:42149:19413:97:6665:6915:6085:19752:9058:19655:50667:9436:19354:8104:9408:6106:6797:70814:6096:43936:45046:6636:51701:44262:6520:6559:19379:8152:44859:15976:7160:34354:44406:46148:6696:42866:9267:7264:16573:19427:36170:6569:9092:30448:61621:42144:51156:6013:71216:55114:…
43436	oxoacid metabolic process	31 out of 252 genes, 12.3%	390 out of 13081 background genes, 3.0%	0.00464	0	GOR1:ERG3:PEX3:SAM4:ARO8:MET1:ALD5:GPM1:CDC19:ARA1:ACS1:C3_00170C_A:C3_03680W_A:TDH3:TPI1:AAT22:ERG251:VTC4:PYC2:LYS1:GDH3:PDC11:MET14:PGK1:FAD2:MAE1:MET2:VTC3:ADE13:PGI1:GLK1	16237:32581:6006:19284:30447:6002:48315:6090:19660:44182:6098:46835:1678:9405:44208:6631:2000769:44416:19878:19722:6537:42149:19413:6665:6915:6085:19752:9058:19655:50667:9436:19354:8104:9408:6106:6797:6096:43936:45046:6636:51701:44262:6520:6559:19379:8152:44859:15976:7160:44406:46148:6696:42866:9267:7264:16573:19427:36170:6569:9092:30448:61621:42144:51156:6013:71216:55114:7034:6094:7163:19654:949…
9185	ribonucleoside diphosphate metabolic process	8 out of 252 genes, 3.2%	31 out of 13081 background genes, 0.2%	0.0052	0	GPM1:CDC19:TDH3:TPI1:PDC11:PGK1:PGI1:GLK1	6006:30447:6002:48315:19660:6098:46835:1678:44416:6915:19655:6096:51701:6559:8152:7160:44406:42866:9267:36170:6569:30448:61621:51156:6013:55114:71216:6094:7163:949:51211:46323:36180:72593
46496	nicotinamide nucleotide metabolic process	11 out of 252 genes, 4.4%	63 out of 13081 background genes, 0.5%	0.00564	0	C1_02220C_A:C1_08490W_A:GPM1:CDC19:C2_08100W_A:TDH3:TPI1:PDC11:PGK1:PGI1:GLK1	6006:30447:6002:48315:6116:19660:6098:46835:1678:44416:6915:19655:2000377:43065:6096:51701:6559:8152:7160:34354:44406:42866:9267:36170:6569:46496:30448:61621:51156:6013:55114:71216:6094:7163:304:949:51211:46323:36180:72593
5996	monosaccharide metabolic process	10 out of 252 genes, 4.0%	52 out of 13081 background genes, 0.4%	0.00612	0	GPM1:CDC19:TDH3:TPI1:PYC2:SOU1:PDC11:PGK1:PGI1:GLK1	6006:30447:6002:48315:6090:19660:6098:46835:1678:44416:42149:6915:19655:9408:6096:51701:6559:8152:15976:7160:44406:42866:9267:42850:36170:6569:30448:61621:51156:6013:55114:71216:6094:7163:949:51211:46323:36180:72593
19362	pyridine nucleotide metabolic process	11 out of 252 genes, 4.4%	64 out of 13081 background genes, 0.5%	0.00661	0	C1_02220C_A:C1_08490W_A:GPM1:CDC19:C2_08100W_A:TDH3:TPI1:PDC11:PGK1:PGI1:GLK1	6006:30447:6002:48315:6116:19660:6098:46835:1678:44416:6915:19655:2000377:43065:6096:51701:6559:8152:7160:34354:44406:42866:9267:36170:6569:46496:30448:61621:51156:6013:55114:71216:6094:7163:304:949:51211:46323:36180:72593
46939	nucleotide phosphorylation	7 out of 252 genes, 2.8%	24 out of 13081 background genes, 0.2%	0.00843	0	GPM1:CDC19:TDH3:TPI1:PGK1:PGI1:GLK1	6006:30447:6002:48315:19660:6098:46835:1678:44416:6915:6096:51701:8152:7160:44406:42866:9267:36170:30448:61621:51156:6013:55114:71216:6094:7163:51211:46323:36180:72593
9132	nucleoside diphosphate metabolic process	8 out of 252 genes, 3.2%	36 out of 13081 background genes, 0.3%	0.01727	0	GPM1:CDC19:TDH3:TPI1:PDC11:PGK1:PGI1:GLK1	6006:30447:6002:48315:19660:6098:46835:1678:44416:6915:19655:6096:51701:6559:8152:7160:44406:42866:9267:36170:6569:30448:61621:51156:6013:55114:71216:6094:7163:949:51211:46323:36180:72593
6732	coenzyme metabolic process	16 out of 252 genes, 6.3%	150 out of 13081 background genes, 1.1%	0.03385	0	C1_02220C_A:SNO1:SAM4:C1_08490W_A:OSM2:GPM1:CDC19:C2_08100W_A:ACS1:TDH3:TPI1:PDC11:PGK1:C6_03820C_A:PGI1:GLK1	6006:19284:6777:30447:6002:48315:6116:8615:43066:19660:34975:42823:6098:46835:1678:44416:6915:6085:19655:50667:2000377:43065:6096:51701:6559:8152:7160:34354:44406:42866:9267:16573:19427:36170:6569:46496:30448:61621:51156:6013:46443:71216:55114:6094:7163:304:19654:949:51211:46323:36180:72593
32787	monocarboxylic acid metabolic process	17 out of 252 genes, 6.7%	167 out of 13081 background genes, 1.3%	0.03538	0	GOR1:ERG3:PEX3:ALD5:GPM1:CDC19:ACS1:TDH3:TPI1:ERG251:PYC2:PDC11:PGK1:FAD2:MAE1:PGI1:GLK1	32581:6006:30447:6002:48315:6090:19660:44182:6098:46835:1678:9405:6631:44416:42149:19413:6915:6085:19655:9436:9408:6096:43936:45046:6636:51701:6520:6559:8152:44859:15976:7160:44406:6696:42866:9267:16573:19427:36170:6569:30448:61621:51156:6013:71216:55114:6094:7163:19654:949:51211:46323:36180:45033:6108:72593:35690:6633
19752	carboxylic acid metabolic process	28 out of 252 genes, 11.1%	380 out of 13081 background genes, 2.9%	0.05497	0.0014	GOR1:ERG3:PEX3:SAM4:ARO8:MET1:ALD5:GPM1:CDC19:ARA1:ACS1:C3_03680W_A:TDH3:TPI1:AAT22:ERG251:PYC2:LYS1:GDH3:PDC11:MET14:PGK1:FAD2:MAE1:MET2:ADE13:PGI1:GLK1	32581:6006:19284:30447:6002:48315:6090:19660:44182:6098:46835:1678:9405:44208:6631:44416:19878:19722:6537:42149:19413:6665:6915:6085:19752:9058:19655:50667:9436:19354:9408:6106:6096:43936:45046:6636:51701:44262:6520:6559:19379:8152:44859:15976:7160:44406:46148:6696:42866:9267:16573:19427:36170:6569:9092:30448:61621:51156:6013:71216:55114:6094:7163:19654:949:51211:46323:36180:9086:45033:6189:6108:…
41	transition metal ion transport	8 out of 252 genes, 3.2%	42 out of 13081 background genes, 0.3%	0.05667	0.0014	FTR1:SIT1:FRE10:CFL1:FET34:CTR1:C7_00430W_A:ATX1	15891:33215:6827:34599:1901684:6879:9405:15677:34759:46688:6878:6825:36170:35434:10106:55114:71281:44117:36180:34755:6826:44718:42928:35690
6733	oxidoreduction coenzyme metabolic process	11 out of 252 genes, 4.4%	82 out of 13081 background genes, 0.6%	0.07332	0.0013	C1_02220C_A:C1_08490W_A:GPM1:CDC19:C2_08100W_A:TDH3:TPI1:PDC11:PGK1:PGI1:GLK1	6006:30447:6002:48315:6116:19660:6098:46835:1678:44416:6915:19655:2000377:43065:6096:51701:6559:8152:7160:34354:44406:42866:9267:36170:6569:46496:30448:61621:51156:6013:55114:71216:6094:7163:304:949:51211:46323:36180:72593
44711	single-organism biosynthetic process	39 out of 252 genes, 15.5%	623 out of 13081 background genes, 4.8%	0.07428	0.0013	C1_01360C_A:CWH8:SNO1:PDR16:ERG3:SAM4:C1_08490W_A:RIB3:ARO8:ERG28:ARO3:MET1:ALD5:GPM1:CDC19:ECM17:ACS1:TPS3:PMA1:ERG6:BMT1:ERG251:C4_02420C_A:PYC2:LYS1:GDH3:PDC11:MET14:ERG11:URA4:PGK1:FAD2:C6_01370W_A:CHS1:GSY1:MET2:ADE6:ADE13:PGI1	19284:30447:48315:55085:16126:8615:15914:43066:6038:43942:6090:44182:42823:6812:8610:90529:6098:9405:44208:9060:9073:30433:44416:19878:103:5978:6537:42149:36187:19413:97:6970:6221:6085:19655:50667:19354:6506:16485:5992:9408:6106:70814:6096:43936:916:71210:6636:51701:9231:6754:6559:19379:44859:15976:51453:1766:34354:35269:70135:46148:6696:42866:9267:16573:8654:1902906:19427:36170:6569:9092:30448:6…
44724	single-organism carbohydrate catabolic process	9 out of 252 genes, 3.6%	57 out of 13081 background genes, 0.4%	0.09183	0.0025	GPM1:CDC19:TDH3:TPI1:SOU1:C5_04120C_A:PGK1:PGI1:GLK1	6006:30447:6002:48315:19660:6098:46835:1678:44416:6915:6096:51701:8152:7160:44406:42866:9267:42850:36170:30448:61621:51156:6013:55114:71216:6094:7163:51211:46323:36180:19310:72593:35690

## Sheet: 4. GO component - UP genes
GO components of all genes with increased RNA PolII occupancy in the wild type strain in response to caspofungin.
GOID	GO term	Cluster frequency	Background frequency	Corrected P-value	False discovery rate	Gene(s) annotated to the term	Directly Annotated GOID List
9986	cell surface	30 out of 294 genes, 10.2%	207 out of 13081 background genes, 1.6%	1.32e-09	0	PHR2:CSH1:PGA6:CHS3:ACT1:PGA52:DFG5:SOD5:PGA33:DDR48:UTR2:SAP9:KRE9:BGL2:CRH11:PGA54:SAP10:PHR1:ECM331:MID1:GPD2:ALS1:SSR1:PGA23:KRE1:PGA13:CHS2:PLB3:INO1:PGA1	5628:9986:812:32432:31011:30864:46658:324:30134:51286:144:9514:5621:5886:35267:15629:35841:32153:5935:42597:30445:45009:30446:9331:5737:131:5829:142:936:5739:5783:30479:35840:5884:33101:9277:5933:30428:1411:31225:43332:34399:5576:45121
71944	cell periphery	63 out of 294 genes, 21.4%	871 out of 13081 background genes, 6.7%	3e-07	0	PHR2:MOB2:CCH1:CRL1:GSC1:CSH1:DPM1:OPY2:PGA6:MNN12:C1_11250W_A:C1_13690C_A:ACT1:FTR2:DDI1:PGA52:DFG5:SOD5:C2_00750W_A:C2_00940W_A:ITR1:PNG2:RTA3:RTA2:DDR48:UTR2:C3_01890C_A:GLX3:SAP9:KRE9:WSC1:PIN3:KRE6:UBI4:C4_00860C_A:AGP2:CRD2:BGL2:C4_02720C_A:CRH11:C4_03110W_A:SAP10:PHR1:VPS1:GPR1:C5_01440C_A:ECM331:MID1:SAC6:ALS1:SAC7:DFI1:SSR1:CR_01720W_A:INN1:KRE1:PST3:FLC2:PGA13:CR_08990C_A:CHS2:PLB3:INO1	99079:5628:9986:30864:46658:324:30133:70867:51286:329:5826:5621:5886:35267:15629:1990023:1990429:5887:32153:35841:44732:42597:922:148:44697:5737:31097:142:936:5777:30173:35840:932:5884:97311:30140:9277:5933:31934:5802:30428:31225:31201:43332:31520:45121:30176:42175:33573:812:5789:55028:35371:32432:31011:30134:5934:9514:144:16021:5770:30658:5935:30445:45009:30446:51285:131:5768:5829:71561:5739:578…
5618	cell wall	23 out of 294 genes, 7.8%	165 out of 13081 background genes, 1.3%	8.97e-07	0	PHR2:CSH1:PGA6:PGA52:DFG5:SOD5:DDR48:UTR2:GLX3:SAP9:KRE9:WSC1:CRD2:BGL2:CRH11:SAP10:PHR1:ECM331:ALS1:SSR1:KRE1:PGA13:INO1	9986:46658:324:5621:5886:32153:35841:5737:936:35840:932:97311:9277:30428:31225:45121:30134:144:30445:30446:131:5829:5783:5739:33101:5634:10494:34399:5576
9277	fungal-type cell wall	23 out of 294 genes, 7.8%	165 out of 13081 background genes, 1.3%	8.97e-07	0	PHR2:CSH1:PGA6:PGA52:DFG5:SOD5:DDR48:UTR2:GLX3:SAP9:KRE9:WSC1:CRD2:BGL2:CRH11:SAP10:PHR1:ECM331:ALS1:SSR1:KRE1:PGA13:INO1	9986:46658:324:5621:5886:32153:35841:5737:936:35840:932:97311:9277:30428:31225:45121:30134:144:30445:30446:131:5829:5783:5739:33101:5634:10494:34399:5576
30312	external encapsulating structure	23 out of 294 genes, 7.8%	166 out of 13081 background genes, 1.3%	1.01e-06	0	PHR2:CSH1:PGA6:PGA52:DFG5:SOD5:DDR48:UTR2:GLX3:SAP9:KRE9:WSC1:CRD2:BGL2:CRH11:SAP10:PHR1:ECM331:ALS1:SSR1:KRE1:PGA13:INO1	9986:46658:324:5621:5886:32153:35841:5737:936:35840:932:97311:9277:30428:31225:45121:30134:144:30445:30446:131:5829:5783:5739:33101:5634:10494:34399:5576
31224	intrinsic component of membrane	43 out of 294 genes, 14.6%	529 out of 13081 background genes, 4.0%	6.85e-06	0	PHR2:ROT1:GSC1:C1_02700C_A:C1_04630C_A:CHS7:OPY2:C1_09220W_A:TVP18:CHO1:C1_13690C_A:FTR2:PGA52:C2_00940W_A:FGR22:PLC2:ITR1:RTA3:RTA2:ARE2:C2_07760W_A:DFG10:C2_10720C_A:PMC1:UTR2:SAP9:SKN1:KRE6:AGP2:CRH11:C4_03110W_A:SAP10:PHR1:GPR1:C5_05020C_A:ATG15:DFI1:ENA21:LAG1:FLC2:CR_07480W_A:RTA4:PLB3	8250:5628:9986:46658:324:30133:70867:329:5621:5886:5887:32153:35841:71627:42597:148:5737:936:30173:35840:30140:9277:5933:30428:5802:31225:31201:31520:45121:30176:33573:139:5789:30134:61576:144:5934:16021:30136:30658:5935:30445:30446:51285:131:5768:5829:30137:5783:5739:33101:16020:5775:1411:34399:5576:5741:31224
46658	anchored component of plasma membrane	8 out of 294 genes, 2.7%	18 out of 13081 background genes, 0.1%	8.16e-06	0	PHR2:PGA52:UTR2:SAP9:CRH11:SAP10:PHR1:PLB3	9986:46658:5621:5886:32153:35841:42597:936:35840:9277:30428:31225:45121:30134:144:30445:30446:131:5783:5739:33101:34399:5576
30427	site of polarized growth	28 out of 294 genes, 9.5%	264 out of 13081 background genes, 2.0%	9.08e-06	0	PHR2:MOB2:CRL1:GSC1:TUS1:CHS7:SWE1:CHS3:SEC18:C1_13690C_A:ACT1:C1_14060W_A:C2_05040C_A:C2_08960C_A:UTR2:C3_01890C_A:KRE6:C4_00860C_A:HOS3:C4_03110W_A:C4_04560C_A:C4_06470W_A:CEK1:C6_02090C_A:WSC2:SAC6:INN1:CHS2	99079:5628:9986:30864:46658:324:30133:70867:51286:329:5826:5621:5886:35267:15629:32153:35841:44732:148:44697:5737:142:5840:936:35840:5884:5635:935:30140:9277:5933:5802:30428:31201:43332:45121:30176:812:5789:32432:31011:30134:144:9514:5934:16021:30658:5935:30445:45009:30446:51285:5768:131:5829:5758:1990819:5783:5739:5794:5938:30479:5634:1411:10494:34399:5576:31224
5933	cellular bud	23 out of 294 genes, 7.8%	189 out of 13081 background genes, 1.4%	1.22e-05	0	MOB2:CRL1:GSC1:TUS1:CHS7:SWE1:CHS3:C1_13690C_A:ACT1:C2_05040C_A:C2_08960C_A:UTR2:C3_01890C_A:KRE6:C4_00860C_A:HOS3:PHR1:C4_04560C_A:C4_06470W_A:C6_02090C_A:WSC2:SAC6:INN1	99079:5628:9986:30864:46658:324:30133:51286:329:5826:5621:5886:35267:15629:32153:148:44697:5737:142:5840:5884:935:9277:5933:5802:30428:31201:43332:45121:30176:812:5789:32432:31011:144:9514:5934:16021:30658:5935:30445:45009:30446:51285:5768:131:5829:5783:5938:30479:33101:5634:1411:5576:31224
31225	anchored component of membrane	8 out of 294 genes, 2.7%	19 out of 13081 background genes, 0.1%	1.36e-05	0	PHR2:PGA52:UTR2:SAP9:CRH11:SAP10:PHR1:PLB3	9986:46658:5621:5886:32153:35841:42597:936:35840:9277:30428:31225:45121:30134:144:30445:30446:131:5783:5739:33101:34399:5576
16020	membrane	89 out of 294 genes, 30.3%	1595 out of 13081 background genes, 12.2%	3.05e-05	0	PHR2:VPS27:ROT1:CCH1:CRL1:GSC1:C1_02700C_A:KTR4:C1_04630C_A:SIP5:C1_06000W_A:CHS7:DPM1:OPY2:C1_09220W_A:TVP18:ERO1:MNN12:CHO1:CHS3:AKR1:C1_13690C_A:ACT1:IML2:FTR2:DDI1:PGA52:DFG5:C2_00750W_A:C2_00940W_A:SMP2:FGR22:PLC2:ITR1:PNG2:C2_05670C_A:RTA3:RTA2:ARE2:C2_07760W_A:JEM1:DFG10:MIT1:C2_10720C_A:PMC1:UTR2:SAP9:PEP8:WSC1:C3_04260W_A:RCT1:SKN1:KRE6:UBI4:C4_00860C_A:AGP2:HOS3:C4_02720C_A:CRH11:C4_031…	8250:99079:5628:9986:31965:30864:46658:324:30133:70867:51286:329:5826:5621:5886:35267:15629:1990429:19898:30906:5887:32153:35841:71627:42597:148:33565:5737:142:5840:936:5777:30173:19867:35840:5884:214:97311:5743:30140:9277:5933:31934:5802:30428:31225:31201:43332:31520:45121:30176:42175:33573:812:139:5789:32432:31011:5774:30134:61576:144:9514:5934:16021:30136:5770:5787:30658:5811:5935:30445:45009:…
5886	plasma membrane	41 out of 294 genes, 13.9%	529 out of 13081 background genes, 4.0%	5.42e-05	0	PHR2:CCH1:CRL1:GSC1:DPM1:OPY2:C1_13690C_A:FTR2:DDI1:PGA52:DFG5:C2_00750W_A:C2_00940W_A:ITR1:PNG2:RTA3:RTA2:UTR2:SAP9:WSC1:KRE6:UBI4:C4_00860C_A:AGP2:C4_02720C_A:CRH11:C4_03110W_A:SAP10:PHR1:GPR1:C5_01440C_A:ECM331:MID1:SAC6:DFI1:SSR1:PST3:FLC2:CR_08990C_A:CHS2:PLB3	99079:5628:9986:46658:324:30133:70867:329:5826:5621:5886:1990429:5887:32153:35841:42597:148:936:30173:35840:97311:30140:9277:5933:31934:30428:5802:43332:31225:31201:31520:45121:30176:42175:33573:5789:32432:30134:144:5934:16021:30658:5935:30445:45009:30446:51285:5768:131:5829:5783:5739:30479:33101:16020:5634:1411:34399:5576:5741
31226	intrinsic component of plasma membrane	12 out of 294 genes, 4.1%	62 out of 13081 background genes, 0.5%	0.00013	0	PHR2:OPY2:PGA52:ITR1:UTR2:SAP9:AGP2:CRH11:SAP10:PHR1:FLC2:PLB3	9986:46658:324:329:5621:5886:5887:32153:35841:42597:936:30173:35840:9277:30428:31225:31520:45121:5789:30134:144:30445:30446:131:5783:5739:33101:16020:34399:5576
5935	cellular bud neck	17 out of 294 genes, 5.8%	147 out of 13081 background genes, 1.1%	0.00132	0	MOB2:CRL1:GSC1:TUS1:CHS7:SWE1:CHS3:ACT1:C2_05040C_A:C2_08960C_A:UTR2:C3_01890C_A:KRE6:C4_00860C_A:HOS3:C6_02090C_A:INN1	5628:9986:30864:46658:324:30133:51286:329:5886:35267:15629:32153:148:44697:5737:142:5884:935:9277:5933:30428:43332:30176:812:5789:32432:31011:144:9514:5934:16021:5935:30445:45009:30446:131:5829:5783:5938:30479:5634:1411:5576:31224
44459	plasma membrane part	15 out of 294 genes, 5.1%	122 out of 13081 background genes, 0.9%	0.00217	0	PHR2:GSC1:OPY2:FTR2:PGA52:ITR1:UTR2:SAP9:AGP2:CRH11:C4_03110W_A:SAP10:PHR1:FLC2:PLB3	5628:9986:46658:324:70867:329:5621:5886:5887:32153:35841:42597:148:936:30173:35840:30140:9277:5802:30428:31225:31520:45121:33573:5789:30134:144:16021:5935:30445:30446:131:5783:5739:33101:16020:34399:5576
16021	integral component of membrane	34 out of 294 genes, 11.6%	498 out of 13081 background genes, 3.8%	0.009	0	ROT1:GSC1:C1_02700C_A:C1_04630C_A:OPY2:C1_09220W_A:TVP18:CHO1:C1_13690C_A:FTR2:C2_00940W_A:FGR22:PLC2:ITR1:RTA3:RTA2:ARE2:C2_07760W_A:DFG10:C2_10720C_A:PMC1:SKN1:KRE6:AGP2:C4_03110W_A:GPR1:C5_05020C_A:ATG15:DFI1:ENA21:LAG1:FLC2:CR_07480W_A:RTA4	8250:5628:324:30133:70867:329:5886:32153:5887:71627:148:5737:30173:30140:5933:5802:31201:31520:45121:30176:33573:139:5789:61576:16021:30136:30658:5935:51285:5768:5829:30137:5783:16020:5775:1411:5741
30445	yeast-form cell wall	9 out of 294 genes, 3.1%	55 out of 13081 background genes, 0.4%	0.01333	0	PHR2:UTR2:GLX3:CRD2:BGL2:CRH11:PHR1:ALS1:SSR1	9986:46658:324:5621:5886:32153:35841:936:35840:932:97311:9277:30428:45121:30134:144:30445:30446:131:5829:5739:33101:5634:10494:34399:5576
30446	hyphal cell wall	10 out of 294 genes, 3.4%	69 out of 13081 background genes, 0.5%	0.01557	0	PHR2:CSH1:SOD5:DDR48:UTR2:GLX3:CRH11:PHR1:ALS1:INO1	9986:46658:5621:5886:32153:35841:5737:936:35840:932:97311:9277:30428:45121:30134:144:30445:30446:131:5829:5739:33101:5634:10494:34399:5576

## Sheet: 5. GO component - DOWN genes
GO components of all genes with decreased RNA PolII occupancy in the wild type strain in response to caspofungin.
GOID	GO term	Cluster frequency	Background frequency	Corrected P-value	False discovery rate	Gene(s) annotated to the term	Directly Annotated GOID List
71944	cell periphery	74 out of 252 genes, 29.4%	871 out of 13081 background genes, 6.7%	2.01e-16	0	C1_00310W_A:C1_01490W_A:XOG1:ENG1:PDR16:PIL1:SYG1:ERG3:C1_06700W_A:GAP4:CDR4:C1_08610C_A:TPO3:ALP1:HSP70:RBE1:FTR1:SOD4:HGT7:HGT8:HGT6:GPM1:WH11:CDC19:ECM17:GIT1:DBF2:FRP3:SIT1:DSE1:YWP1:PMA1:C3_00850C_A:C3_01540W_A:ERG6:C3_03680W_A:NCE102:TDH3:SLK19:TPI1:C3_07470W_A:RBT5:HOF1:PGA53:ERG251:AHP1:SUL2:VTC4:RHD3:FRE10:CFL1:PDC11:ERG11:HSP12:C5_02110W_A:C5_03800W_A:SCW11:FET34:FET31:PGK1:SEC8:CTR1:EB…	5628:9986:9337:46658:324:51286:329:5816:5886:35838:32153:5887:44732:44697:31307:5737:31097:142:33254:31310:5635:97311:935:71014:9277:5933:30428:43332:45121:33573:9514:144:5934:16021:70250:5811:5935:97249:145:30445:30446:51285:5768:131:5829:5758:34973:1990819:5783:5739:5794:32178:97038:33101:71944:71341:30287:5788:32126:31305:16020:5634:32541:1411:9897:10494:5576:5741
5886	plasma membrane	53 out of 252 genes, 21.0%	529 out of 13081 background genes, 4.0%	5.48e-14	0	C1_00310W_A:C1_01490W_A:PDR16:PIL1:SYG1:ERG3:GAP4:CDR4:C1_08610C_A:TPO3:ALP1:HSP70:FTR1:HGT7:HGT8:HGT6:CDC19:GIT1:FRP3:SIT1:PMA1:C3_00850C_A:C3_01540W_A:ERG6:NCE102:TDH3:SLK19:TPI1:C3_07470W_A:RBT5:HOF1:PGA53:ERG251:AHP1:SUL2:RHD3:FRE10:CFL1:PDC11:ERG11:C5_02110W_A:C5_03800W_A:FET34:FET31:PGK1:CTR1:C6_01530C_A:C7_00430W_A:FLU1:CSP37:OPT1:PGI1:GLK1	9986:46658:324:51286:329:5886:35838:32153:5887:44697:31307:5737:142:97311:71014:9277:5933:43332:45121:33573:144:9514:16021:70250:5811:97249:30445:30446:51285:5768:5829:5783:5739:32178:5794:33101:5788:32126:31305:16020:5634:9897:5576:5741
9986	cell surface	32 out of 252 genes, 12.7%	207 out of 13081 background genes, 1.6%	5.31e-13	0	XOG1:ENG1:PHO100:COI1:FGR41:HSP70:RBE1:FTR1:SOD4:PLB4.5:GPM1:CDC19:SIT1:YWP1:PMA1:TDH3:TPI1:RBT5:PGA53:PGA38:RHD3:FRE10:PDC11:SCW11:PGA48:PGK1:EBP1:CHS1:CSP37:PHO113:PHO112:CHT3	9986:46658:324:5886:31307:5737:5635:97311:935:71014:9277:30428:45121:33573:9514:16021:5811:5935:30445:30446:5768:5829:5758:1990819:5739:5783:5794:71944:30287:16020:5634:9897:5576
5576	extracellular region	30 out of 252 genes, 11.9%	233 out of 13081 background genes, 1.8%	5.75e-10	0	GOR1:XOG1:ENG1:PHO100:COI1:FGR41:C1_10820C_A:RIB3:HSP70:RBE1:SOD4:PLB4.5:GPM1:YWP1:APE3:TDH3:TPI1:RBT5:RBT7:RHD3:GDH3:PDC11:SCW11:PGK1:PLB1:PRX1:PHO113:PHO112:PGI1:CHT3	9986:46658:324:5886:5737:5840:5635:97311:935:71014:9277:30428:9514:5811:5935:30445:30446:5829:5758:328:1990819:5783:5739:71944:30287:16020:5634:9897:5576
5618	cell wall	24 out of 252 genes, 9.5%	165 out of 13081 background genes, 1.3%	7.35e-09	0	XOG1:ENG1:HSP70:RBE1:SOD4:GPM1:WH11:CDC19:DSE1:YWP1:TDH3:TPI1:RBT5:AHP1:RHD3:PDC11:HSP12:C5_02110W_A:SCW11:PGK1:EBP1:C7_00190W_A:CSP37:CHT3	9986:46658:324:5886:31307:5737:5635:97311:935:71014:9277:30428:9514:16021:5811:5935:30445:30446:5768:5829:5758:1990819:5739:5783:16020:5634:9897:5576
9277	fungal-type cell wall	24 out of 252 genes, 9.5%	165 out of 13081 background genes, 1.3%	7.35e-09	0	XOG1:ENG1:HSP70:RBE1:SOD4:GPM1:WH11:CDC19:DSE1:YWP1:TDH3:TPI1:RBT5:AHP1:RHD3:PDC11:HSP12:C5_02110W_A:SCW11:PGK1:EBP1:C7_00190W_A:CSP37:CHT3	9986:46658:324:5886:31307:5737:5635:97311:935:71014:9277:30428:9514:16021:5811:5935:30445:30446:5768:5829:5758:1990819:5739:5783:16020:5634:9897:5576
30312	external encapsulating structure	24 out of 252 genes, 9.5%	166 out of 13081 background genes, 1.3%	8.38e-09	0	XOG1:ENG1:HSP70:RBE1:SOD4:GPM1:WH11:CDC19:DSE1:YWP1:TDH3:TPI1:RBT5:AHP1:RHD3:PDC11:HSP12:C5_02110W_A:SCW11:PGK1:EBP1:C7_00190W_A:CSP37:CHT3	9986:46658:324:5886:31307:5737:5635:97311:935:71014:9277:30428:9514:16021:5811:5935:30445:30446:5768:5829:5758:1990819:5739:5783:16020:5634:9897:5576
30446	hyphal cell wall	16 out of 252 genes, 6.3%	69 out of 13081 background genes, 0.5%	1.16e-08	0	HSP70:SOD4:GPM1:WH11:CDC19:YWP1:TDH3:TPI1:AHP1:RHD3:PDC11:HSP12:C5_02110W_A:PGK1:EBP1:CSP37	9986:46658:324:5886:31307:5737:97311:71014:9277:9514:16021:5811:30445:30446:5768:5829:5758:5739:16020:5634:9897:5576
30445	yeast-form cell wall	13 out of 252 genes, 5.2%	55 out of 13081 background genes, 0.4%	5.94e-07	0	HSP70:SOD4:WH11:CDC19:YWP1:TDH3:RBT5:AHP1:RHD3:PDC11:HSP12:C5_02110W_A:PGK1	9986:46658:5886:5737:97311:71014:9277:9514:5811:30445:30446:5768:5829:5739:16020:5634:9897:5576
16020	membrane	77 out of 252 genes, 30.6%	1595 out of 13081 background genes, 12.2%	0.00014	0	C1_00310W_A:C1_01490W_A:CWH8:PDR16:PIL1:SYG1:ERG3:GAP4:PEX3:CDR4:C1_08610C_A:TPO3:ALP1:HSP70:FTR1:HGT7:HGT8:HGT6:ERG28:CDC19:GIT1:FRP3:C2_07440C_A:SIT1:C3_00170C_A:PMA1:C3_00850C_A:ATO2:C3_01540W_A:ERG6:FCY2:NCE102:C3_05280C_A:TDH3:SLK19:TPI1:C3_07470W_A:RBT5:HOF1:PGA53:ERG251:AHP1:C4_02420C_A:SUL2:VTC4:RHD3:FRE10:CFL1:PDC11:C5_00280C_A:ERG11:GIT3:C5_02110W_A:C5_03800W_A:FET34:FET31:PGK1:SEC8:CTR…	5628:9986:46658:324:51286:329:5886:35838:32153:5887:44697:31307:5737:142:33254:31310:97311:1990529:5743:71014:9277:5933:5778:30428:31314:43332:45121:30176:33573:5789:5934:144:9514:16021:70250:5811:5935:145:97249:30445:30446:51285:131:5768:5829:5758:5783:5739:32178:5794:5779:33101:71944:30287:5788:32126:31305:16020:5634:1411:9897:5576:5741
31224	intrinsic component of membrane	36 out of 252 genes, 14.3%	529 out of 13081 background genes, 4.0%	0.00017	0	CWH8:SYG1:GAP4:PEX3:CDR4:C1_08610C_A:TPO3:FTR1:HGT7:HGT8:HGT6:ERG28:GIT1:FRP3:C2_07440C_A:C3_00170C_A:PMA1:ATO2:C3_05280C_A:SLK19:PGA53:C4_02420C_A:SUL2:VTC4:RHD3:FRE10:ERG11:GIT3:C5_03800W_A:CTR1:C6_03540W_A:NAG3:FLU1:CSP37:OPT1:MIM1	9986:46658:324:329:5886:32153:5887:31307:5737:33254:31310:9277:5778:45121:30176:33573:5789:16021:5811:97249:30445:30446:5829:5783:5739:5794:5779:33101:71944:32126:31305:16020:5634:5576
16021	integral component of membrane	32 out of 252 genes, 12.7%	498 out of 13081 background genes, 3.8%	0.00245	0	CWH8:SYG1:GAP4:PEX3:CDR4:C1_08610C_A:TPO3:FTR1:HGT7:HGT8:HGT6:ERG28:GIT1:FRP3:C2_07440C_A:PMA1:ATO2:C3_05280C_A:SLK19:C4_02420C_A:SUL2:FRE10:ERG11:GIT3:C5_03800W_A:CTR1:C6_03540W_A:NAG3:FLU1:CSP37:OPT1:MIM1	9986:324:329:5886:5887:31307:5737:5778:45121:30176:33573:5789:16021:5811:97249:30446:5829:5783:5739:5794:5779:33101:32126:31305:16020:5634
44459	plasma membrane part	13 out of 252 genes, 5.2%	122 out of 13081 background genes, 0.9%	0.00817	0	FTR1:HGT7:HGT8:HGT6:NCE102:SLK19:HOF1:PGA53:RHD3:FET34:PGK1:FLU1:OPT1	9986:46658:324:51286:329:5886:35838:5887:44697:5737:142:97311:9277:43332:45121:33573:144:16021:70250:30445:30446:5829:5739:5783:32178:5794:33101:32126:16020:5634:9897:5576
42555	MCM complex	4 out of 252 genes, 1.6%	9 out of 13081 background genes, 0.1%	0.01391	0	CDC54:CDC46:MCM3:MCM2	790:31261:5737:31298:784:42555:5829:5656:30875:97373
36387	pre-replicative complex	5 out of 252 genes, 2.0%	17 out of 13081 background genes, 0.1%	0.01625	0	CDC6:CDC54:CDC46:MCM3:MCM2	790:31261:5737:31298:784:42555:5829:30875:5656:97373
5656	nuclear pre-replicative complex	5 out of 252 genes, 2.0%	17 out of 13081 background genes, 0.1%	0.01625	0	CDC6:CDC54:CDC46:MCM3:MCM2	790:31261:5737:31298:784:42555:5829:30875:5656:97373
33254	vacuolar transporter chaperone complex	3 out of 252 genes, 1.2%	4 out of 13081 background genes, 0.0%	0.01712	0	C3_00170C_A:VTC4:VTC3	329:32153:33254:31310:5783:71944
5933	cellular bud	16 out of 252 genes, 6.3%	189 out of 13081 background genes, 1.4%	0.01872	0	CDC5:ENG1:CYK3:C1_06700W_A:AMN1:DBF2:DSE1:ASH1:NCE102:C3_07470W_A:HOF1:SEC8:FLU1:IQG1:CHS1:CHT3	5628:9986:324:51286:329:5816:5886:70210:1990023:35838:32153:44732:44697:33698:5737:31097:142:97431:5635:9277:5933:30428:43332:45121:5934:144:16021:70250:228:5935:145:34990:51285:131:5829:34973:5739:5783:32178:5794:33101:71341:32126:5819:16020:5634:1411:5576
32126	eisosome	4 out of 252 genes, 1.6%	10 out of 13081 background genes, 0.1%	0.02266	0	PIL1:C3_00850C_A:NCE102:SLK19	5886:35838:5887:5737:45121:16021:70250:5829:5783:5739:5794:33101:32126:5741
44425	membrane part	44 out of 252 genes, 17.5%	906 out of 13081 background genes, 6.9%	0.05481	0.001	CWH8:SYG1:GAP4:PEX3:CDR4:C1_08610C_A:TPO3:FTR1:HGT7:HGT8:HGT6:ERG28:GIT1:FRP3:C2_07440C_A:C3_00170C_A:PMA1:C3_00850C_A:ATO2:NCE102:C3_05280C_A:SLK19:C3_07470W_A:HOF1:PGA53:C4_02420C_A:SUL2:VTC4:RHD3:FRE10:ERG11:GIT3:C5_03800W_A:FET34:PGK1:CTR1:C6_01370W_A:C6_03540W_A:NAG3:FLU1:CSP37:OPT1:MIM1:CR_09620C_A	9986:46658:324:51286:329:5886:35838:32153:5887:44697:31307:5737:142:33254:31310:97311:1990529:9277:5933:5778:31314:43332:45121:30176:33573:5789:144:16021:70250:5811:97249:30445:30446:51285:5829:5758:5783:5739:32178:5794:5779:33101:71944:32126:31305:16020:5634:9897:5576
31261	DNA replication preinitiation complex	5 out of 252 genes, 2.0%	22 out of 13081 background genes, 0.2%	0.0615	0.001	CDC6:CDC54:CDC46:MCM3:MCM2	790:31261:5737:31298:784:42555:5829:30875:5656:97373
45121	membrane raft	5 out of 252 genes, 2.0%	23 out of 13081 background genes, 0.2%	0.07677	0.0018	PMA1:C3_00850C_A:NCE102:SLK19:C3_07470W_A	9986:5886:35838:32153:5887:5737:5933:45121:16021:70250:51285:5829:5783:5739:5794:33101:32126:16020
98857	membrane microdomain	5 out of 252 genes, 2.0%	23 out of 13081 background genes, 0.2%	0.07677	0.0017	PMA1:C3_00850C_A:NCE102:SLK19:C3_07470W_A	9986:5886:35838:32153:5887:5737:5933:45121:16021:70250:51285:5829:5783:5739:5794:33101:32126:16020
30287	cell wall-bounded periplasmic space	3 out of 252 genes, 1.2%	6 out of 13081 background genes, 0.0%	0.08205	0.0042	PHO100:PHO113:PHO112	9986:5783:71944:30287:16020:5576

## Sheet: 6. KEGG
KEGG analysis of differentially bound genes in the wild type strain in response to caspofungin.
		Total DEG	UP	DOWN
MAPK signaling pathway - yeast		13	12	1
Glycerolipid metabolism		6	4	2
Glycerophospholipid metabolism		6	4	2
Inositol phosphate metabolism		4	3	1
Endocytosis		4	3	1
Metabolic pathways		51	13	38
Biosynthesis of secondary metabolites		29	5	24
Biosynthesis of antibiotics		27	4	23
Carbon metabolism		15	1	14
Meiosis - yeast		13	3	10
Biosynthesis of amino acids		13	2	11
Cell cycle - yeast		12	3	9
Glycolysis / Gluconeogenesis		12	1	11
Amino sugar and nucleotide sugar metabolism		9	4	5
Starch and sucrose metabolism		8	2	6
Pyruvate metabolism		7	1	6
Purine metabolism		7	1	6
Alanine, aspartate and glutamate metabolism		6	3	3
DNA replication		6	2	4
Fructose and mannose metabolism		6	1	5
Steroid biosynthesis		5	1	4
Cysteine and methionine metabolism		5	0	5
Arginine biosynthesis		4	2	2
Glycine, serine and threonine metabolism		3	1	2
2-Oxocarboxylic acid metabolism		3	1	2
Methane metabolism		3	0	3
Phenylalanine, tyrosine and tryptophan biosynthesis		3	0	3
Tryptophan metabolism		3	0	3
Lysine biosynthesis		2	0	2
Tyrosine metabolism		2	0	2
Galactose metabolism		2	0	2
Phenylalanine metabolism		2	0	2
Arginine and proline metabolism		2	0	2
Lysine degradation		2	0	2
Pyrimidine metabolism		2	0	2
Spliceosome		2	0	2
Sulfur metabolism		2	0	2
Nitrogen metabolism		3	2	1
Protein processing in endoplasmic reticulum		3	2	1
Pentose and glucuronate interconversions		2	1	1
Propanoate metabolism		2	1	1
Ribosome biogenesis in eukaryotes		2	1	1
Fatty acid degradation		1	0	1
Histidine metabolism		1	0	1
Pentose phosphate pathway		1	0	1
Peroxisome		1	0	1
beta-Alanine metabolism		1	0	1
Valine, leucine and isoleucine degradation		1	0	1
Vitamin B6 metabolism		1	0	1
Ascorbate and aldarate metabolism		1	0	1
Biosynthesis of unsaturated fatty acids		1	0	1
Fatty acid metabolism		1	0	1
Ubiquinone and other terpenoid-quinone biosynthesis		1	0	1
Ubiquitin mediated proteolysis		1	0	1
Valine, leucine and isoleucine biosynthesis		1	0	1
N-Glycan biosynthesis		3	2	1
Regulation of mitophagy - yeast		3	2	1
Citrate cycle (TCA cycle		2	1	1
Sphingolipid metabolism		2	1	1
Hippo signaling pathway -multiple species		1	0	1
Nicotinate and nicotinamide metabolism		1	0	1
Oxidative phosphorylation		1	0	1
Porphyrin and chlorophyll metabolism		1	0	1
Ribosome		1	0	1
Sulfur relay system		1	0	1
Glyoxylate and dicarboxylate metabolism		2	2	0
Arachidonic acid metabolism		1	1	0
Glutathione metabolism		1	1	0
AGE-RAGE signaling pathway in diabetic complications		1	1	0
Mismatch repair		1	1	0
Nucleotide excision repair		1	1	0
Various types of N-glycan biosynthesis		1	1	0
Phagosome		2	2	0
Other types of O-glycan biosynthesis		1	1	0
Protein export		1	1	0
Taurine and hypotaurine metabolism		1	1	0
Longevity regulating pathway - multiple species		4	2	2
