# Supplementary material for: The Candida albicans transcription factor Cas5 couples stress responses, drug resistance and cell cycle regulation
Source: Nat Commun. 2017 Sep 11;8:499. doi: 10.1038/s41467-017-00547-y (PMC5593949; doi:10.1038/s41467-017-00547-y)
Supplement: Supplementary file 4 — Supplementary Data 3 [file 41467_2017_547_MOESM4_ESM.xlsx]

## Sheet: Legend
Supplementary Data 3 - RNA PolII ChIP-seq data for the cas5∆/cas5∆ mutant strain under basal and caspofungin treatment condition.
Sheet 1: Normalized RNA PolII occupancy of differentially bound genes in the cas5∆/cas5∆ mutant strain under basal and caspofungin treatment conditions.
The ORF numbers under gene names are derived from Genome Assembly 21.
All genes with greater than 1.5-fold change in RNA PolII binding are listed.
A negative Log2FC indicates that the gene was bound by RNA PolII at higher levels under basal condition than caspofungin treatment condition in the cas5∆/cas5∆ mutant strain.
Sheet 2: A list of genes that require Cas5 for increased RNA PolII occupancy in response to caspofungin.
In response to caspofungin, these genes are upregulated in wild type strain but failed to be upregulated in the cas5∆/cas5∆ mutant strain.
The ORF numbers under gene names are derived from Genome Assembly 21.
Sheet 3: GO processes of genes that require Cas5 for increased RNA PolII occupancy in response to caspofungin.
The gene names are derived from Genome Assembly 22.
The genes are categorized by processes using CGD GO Term finder function.
Only GO processes with a corrected P-value of < 0.1 are included.
Sheet 4: GO components of genes that require Cas5 for increased RNA PolII occupancy in response to caspofungin.
The gene names are derived from Genome Assembly 22.
The genes are categorized by processes using CGD GO Term finder function.
Only GO components with a corrected P-value of < 0.1 are included.

## Sheet: 1. PolII occupancy
Normalized RNA PolII occupancy of differentially bound genes in the cas5∆/cas5∆ mutant strain under basal and caspofungin treatment conditions.
cas5∆ caspo UP	PolII level		Fold change	Log2FC		cas5∆ caspo DOWN	PolII level		Fold change	Log2FC
Gene names	Minus Caspo	Plus Caspo	[+/-]			Gene names	Minus Caspo	Plus Caspo	[+/-]
orf19.711	10.2427	89.095	8.62396	3.10835		orf19.7078	25.2827	17.0016	0.67375	-0.569714
orf19.675	27.755	178.586	6.41487	2.68142		orf19.4736	28.1998	18.956	0.673362	-0.570547
DDR48	12.8437	71.7395	5.55015	2.47253		ERG11	19.8057	13.2982	0.673084	-0.571142
orf19.2959.1	24.0867	129.28	5.34921	2.41933		orf19.4513	34.3365	23.0555	0.672412	-0.572584
RTA2	25.0371	124.501	4.95686	2.30943		LYS22	48.5	32.5276	0.67135	-0.574863
orf19.2125	13.2495	54.7422	4.10818	2.0385		orf19.6600	20.2093	13.5196	0.670609	-0.576456
PHR1	12.7651	50.7239	3.95053	1.98204		CDC19	152.851	102.327	0.669672	-0.578473
CRD2	33.369	125.641	3.75694	1.90956		orf19.6744	39.5905	26.447	0.66885	-0.580245
orf19.263.1	27.1424	101.826	3.74143	1.90359		PGA48	62.9457	41.9522	0.667011	-0.584217
SAP9	24.1965	86.9106	3.5812	1.84044		VTC4	21.0764	13.7853	0.655697	-0.608899
RCT1	75.3168	263.159	3.49072	1.80352		MET2	39.8996	25.8989	0.649979	-0.621535
orf19.7296	14.8469	51.1947	3.4318	1.77896		PFK2	52.9337	34.0155	0.64328	-0.636482
ATG15	13.5031	40.2312	2.96485	1.56796		VTC3	27.0665	17.3645	0.642869	-0.637403
ENA21	26.7687	79.2123	2.95185	1.56162		GPX2	18.6975	11.9263	0.639782	-0.644348
orf19.4706	24.1655	71.4132	2.94711	1.5593		ENO1	305.948	194.426	0.635607	-0.653794
orf19.2030	16.5143	44.431	2.68028	1.42238		LYS12	44.5324	28.2625	0.635469	-0.654107
GFA1	29.5393	76.4834	2.58385	1.36952		ARO8	57.1508	35.9847	0.630292	-0.665909
PMC1	11.0775	28.562	2.56426	1.35854		HIS4	31.2705	19.6387	0.629212	-0.668382
ZRT2	11.6934	29.0017	2.46763	1.30312		GPM1	128.896	81.0389	0.629002	-0.668864
CRH11	28.599	68.9119	2.40468	1.26584		PDX3	35.1381	22.0527	0.628658	-0.669654
HAC1	20.9099	49.9739	2.38335	1.25299		orf19.4507	17.6617	11.0567	0.628132	-0.670859
ALD5	43.2825	102.756	2.37091	1.24544		CBF1	28.1354	17.6282	0.627871	-0.671459
RTA3	10.7251	24.8757	2.3072	1.20614		orf19.6813	23.1031	14.4309	0.626248	-0.675194
RBT4	10.386	23.6444	2.26439	1.17912		DAC1	18.6658	11.6321	0.625185	-0.677645
PGA52	26.7838	60.7047	2.26176	1.17745		orf19.4617	30.1647	18.8103	0.62483	-0.678464
orf19.5799	13.5393	30.6569	2.25502	1.17314		HIS7	22.189	13.8031	0.623765	-0.680925
orf19.2887	29.4433	65.3354	2.2149	1.14724		orf19.7580	39.2531	24.3994	0.622553	-0.683731
orf19.2726	13.0392	28.8744	2.20519	1.1409		ILV2	45.05	27.9225	0.620653	-0.68814
orf19.6920	15.8998	34.6937	2.17463	1.12077		CHA1	40.7204	25.178	0.619249	-0.691408
CRZ1	12.704	27.134	2.12699	1.08881		SNO1	42.5697	26.2161	0.61674	-0.697266
orf19.3264.1	148.512	311.989	2.10003	1.07041		orf19.609	34.2039	21.0169	0.615583	-0.699975
GPM2	10.3962	21.4827	2.05624	1.04001		HOM6	29.7822	18.2739	0.614878	-0.701628
DFG10	10.0333	20.6097	2.04373	1.0312		PRR2	17.8993	10.8905	0.610607	-0.711684
SOD1	15.6127	31.5949	2.01715	1.01232		MNN22	19.3884	11.7	0.605488	-0.723829
orf19.7504	14.277	27.3216	1.90732	0.93155		ARO3	68.3018	40.9058	0.599484	-0.738206
CHS2	13.3766	25.4778	1.89794	0.924436		orf19.6770	20.2343	12.0126	0.595673	-0.747407
PLC2	10.2364	19.4949	1.89572	0.922744		FBA1	268.218	159.127	0.593427	-0.752858
CRL1	14.0842	26.5734	1.8805	0.911117		orf19.1800	18.8122	11.0856	0.591449	-0.757675
orf19.5814	13.675	25.7268	1.8749	0.906817		ADH5	19.9994	11.7872	0.591421	-0.757744
PEX4	18.7798	35.2581	1.8728	0.905197		HGT6	19.9893	11.7619	0.590459	-0.760092
orf19.215	14.0327	26.1712	1.85889	0.894445		PFK1	29.0237	17.0302	0.588188	-0.765652
PEP8	11.7891	21.5151	1.81806	0.8624		HOM3	49.9378	29.2212	0.585981	-0.771074
MIT1	26.0345	47.2227	1.81074	0.856577		HXK2	95.9438	56.1051	0.585203	-0.772991
PST3	33.3148	59.4576	1.78237	0.833798		DEF1	53.7231	31.1969	0.581477	-0.782206
IFU5	17.7703	31.6014	1.77397	0.826983		TPI1	118.162	68.3095	0.578459	-0.789714
PIR1	48.2713	85.5697	1.77109	0.824634		GCV2	74.9037	43.0501	0.575306	-0.797598
PNG2	12.2092	21.6344	1.7657	0.820243		CPH2	26.8743	15.3454	0.572597	-0.804408
GPD2	31.4583	55.599	1.76496	0.819632		TDH3	524.639	299.454	0.570864	-0.808782
RIM101	37.6358	65.8509	1.7477	0.805458		orf19.334	52.2326	29.4572	0.564795	-0.8242
PGA62	349.881	607.285	1.73548	0.795335		BMT1	18.1329	10.1476	0.562039	-0.831258
IPK2	10.332	17.9387	1.72917	0.79008		SEC8	22.3791	12.5212	0.561464	-0.832735
FLC2	18.8279	32.5731	1.72619	0.787589		TIM12	72.7034	40.5431	0.558258	-0.840995
FTR2	33.1603	57.3109	1.72611	0.787523		PGK1	133.103	74.0593	0.556738	-0.844929
orf19.5814.1	13.8214	23.8682	1.72168	0.783817		ROB1	27.3039	14.9669	0.549809	-0.862999
orf19.210	10.3373	17.6246	1.6982	0.764005		GIT3	59.7946	32.1226	0.537988	-0.894353
CCC1	27.1626	45.9499	1.68912	0.756275		orf19.2333	38.5666	20.6675	0.537091	-0.89676
CHS7	15.3251	25.8496	1.6823	0.750432		CDC6	22.6327	11.6154	0.515355	-0.956363
orf19.6555	17.9404	29.7651	1.65546	0.727229		orf19.3364	21.1453	10.8206	0.514024	-0.960092
orf19.1913	31.7573	52.6216	1.65493	0.72677		orf19.6852.1	60.581	30.1867	0.499113	-1.00256
CDR1	22.2866	36.9029	1.6529	0.725003		SMF12	45.155	22.2153	0.493101	-1.02004
SAC6	14.4672	23.87	1.64548	0.718506		FET34	23.8516	11.3708	0.478916	-1.06216
orf19.1950	19.0533	31.1091	1.62944	0.704374		NAG3	34.5651	16.3903	0.475703	-1.07187
orf19.1441	14.9358	24.3647	1.6271	0.7023		ADH1	317.955	148.943	0.468608	-1.09355
IML2	13.2016	21.5284	1.626	0.701327		orf19.7077	62.919	28.7271	0.457435	-1.12836
orf19.6905	11.676	19.0122	1.62298	0.698644		orf19.2529.1	297.9	132.022	0.443361	-1.17345
STF2	18.0324	29.3258	1.62283	0.698512		FRE10	35.4103	15.5863	0.441739	-1.17873
GPR1	17.6669	28.5774	1.61409	0.690722		SHA3	47.6785	20.9344	0.440248	-1.18361
orf19.7070	10.8047	17.4687	1.61111	0.688057		FTR1	38.5813	16.6466	0.432938	-1.20777
orf19.1146	11.329	18.2892	1.60899	0.68616		orf19.3998	47.5436	20.1963	0.426003	-1.23107
orf19.1203.1	15.9645	25.7275	1.60774	0.685032		SCW11	24.2495	10.0842	0.418251	-1.25756
PHR2	44.6919	71.529	1.59915	0.677306		SOD3	57.208	23.5241	0.41223	-1.27848
GRP2	23.4144	37.5026	1.59913	0.677288		orf19.2529	124.104	50.3891	0.406502	-1.29867
orf19.1360.1	13.4703	21.5345	1.59425	0.672881		PGA38	26.5841	10.3906	0.39314	-1.34688
orf19.211	16.229	25.8021	1.58626	0.665633		orf19.4211	66.8049	24.586	0.368971	-1.43842
orf19.6929	14.4278	22.8366	1.57881	0.658835		orf19.4942	44.1171	15.9044	0.36195	-1.46614
orf19.862	17.5494	27.7474	1.57781	0.657923		FRE30	236.683	85.3333	0.360808	-1.4707
orf19.3831	15.7311	24.6712	1.56472	0.645902		orf19.3522	46.988	16.5565	0.353731	-1.49927
orf19.4043	21.5485	33.6764	1.56022	0.641749		FRE7	173.904	60.2921	0.347074	-1.52669
UTR2	23.8865	37.1551	1.55317	0.635215		orf19.33	117.148	39.6344	0.338892	-1.5611
orf19.3007.2	12.0931	18.7499	1.54595	0.628492		HGT7	240.39	77.6258	0.323198	-1.62951
orf19.1267	10.2856	15.8917	1.5398	0.622739		PDC11	290.293	90.6714	0.312582	-1.6777
orf19.6896	16.2905	25.1219	1.53881	0.621817		TYE7	84.5261	24.2668	0.287935	-1.79619
RCE1	12.5799	19.386	1.53676	0.619895		CTR1	490.423	126.658	0.258413	-1.95225
BMT5	10.5067	16.1666	1.53362	0.616937		TPO3	44.9296	10.8084	0.24225	-2.04543
orf19.5813	31.3106	47.9558	1.52992	0.613459		orf19.5114.1	124.213	19.1791	0.155085	-2.68887
MCA1	13.2432	20.3076	1.52944	0.613002		orf19.1050	11.5242	7.7374	0.674231	-0.568684
RPC19	11.7821	18.0436	1.52697	0.610671		orf19.3142	11.4169	7.6475	0.672707	-0.57195
orf19.5365.1	15.9203	24.3264	1.52472	0.60854		PHHB	14.2304	9.4638	0.667378	-0.583423
orf19.3919.1	16.3097	24.8321	1.51935	0.603456		FCY2	12.1447	7.9391	0.656537	-0.607052
MUC1	10.3115	15.6671	1.51439	0.598739		orf19.2336	11.0647	7.2107	0.654805	-0.610863
HBR3	17.0189	25.7861	1.51214	0.596588		orf19.3196	15.0876	9.714	0.646185	-0.629981
KRE1	27.4451	41.4929	1.50999	0.594542		DAK2	13.6458	8.655	0.636922	-0.650812
orf19.7458	15.4594	23.3909	1.50976	0.594316		orf19.1964	11.7776	7.3614	0.628191	-0.670725
orf19.1266	17.7581	26.7408	1.503	0.587849		DSE1	12.1497	7.5861	0.627452	-0.672423
orf19.1414	17.0583	25.6333	1.49976	0.58473		orf19.951	12.3724	7.7129	0.626415	-0.674809
SAC7	17.7763	26.6621	1.49707	0.582143		orf19.5504	12.3233	7.6408	0.623087	-0.682494
orf19.2939	10.5642	15.849	1.49556	0.58069		orf19.4066	15.1017	9.3237	0.619911	-0.689867
orf19.1391	12.4552	18.6367	1.49235	0.577582		orf19.5262	11.5199	6.9435	0.606158	-0.722233
orf19.5282	14.717	21.9761	1.48992	0.575232		orf19.557	10.2839	5.8346	0.571519	-0.807126
RFC5	14.9685	22.3158	1.48759	0.57298		orf19.6805	13.3868	7.5805	0.569483	-0.812276
orf19.3586	13.5359	20.1726	1.48671	0.572121		orf19.1508	11.3168	6.3225	0.562548	-0.829951
CUP1	34.2094	50.8111	1.48388	0.569376		PDR16	10.1634	5.6199	0.55731	-0.843447
orf19.7566	14.4419	21.4384	1.48113	0.566695		orf19.3325	10.2626	5.6418	0.554089	-0.851811
AGP2	19.7952	29.3453	1.48002	0.565617		orf19.4789	14.7098	7.6445	0.522931	-0.935308
orf19.7271	41.6397	61.4115	1.47369	0.559436		SEO1	17.4222	8.8286	0.509559	-0.972678
KRE6	18.2948	26.9591	1.47102	0.556816		orf19.69.2	15.8541	7.9096	0.50204	-0.994125
orf19.7437	11.9011	17.536	1.46953	0.555357		FGR41	16.8792	8.1011	0.483009	-1.04988
DFG5	11.4066	16.7938	1.46818	0.554032		FCR1	18.4654	8.4719	0.461714	-1.11493
PHO23	11.9246	17.5489	1.46773	0.553589		GAC1	18.0762	8.0881	0.450485	-1.15045
RPN4	19.2242	28.0884	1.45871	0.544693		orf19.4907	17.1221	7.658	0.450468	-1.1505
CAT1	14.5465	21.2527	1.45787	0.543863		PHO113	19.5018	8.4148	0.434389	-1.20294
FLC1	16.129	23.4795	1.45292	0.538959		YHB1	13.9645	5.9569	0.430652	-1.21541
orf19.676	13.3298	19.3957	1.45167	0.537718		QDR1	17.3545	7.3546	0.427088	-1.2274
SEF2	10.6714	15.531	1.45116	0.537204		orf19.6816	17.8998	7.2751	0.409732	-1.28725
orf19.199	12.9012	18.7633	1.45089	0.536937		ENG1	20.391	8.0811	0.399253	-1.32462
orf19.1111	15.1581	21.9571	1.5	0.531668		PGA45	11.9757	4.7104	0.398354	-1.32788
SOD5	5.7584	61.2569	10.4733	3.38865		CHT3	16.2122	6.1116	0.380795	-1.39291
PGA23	3.1025	25.1789	7.89349	2.98066		OPT9	14.8273	5.3001	0.36176	-1.4669
orf19.2061	3.2105	19.2068	5.83199	2.54399		POL93	19.2009	6.0609	0.319203	-1.64746
orf19.6840	7.6415	40.2451	5.21154	2.38171		RBE1	24.8025	7.5463	0.307049	-1.70346
PGA31	2.946	13.6188	4.50387	2.17117		orf19.6079	28.8618	8.4159	0.294039	-1.76592
orf19.3932	4.7469	20.9422	4.34137	2.11815		orf19.5267	18.5996	4.9108	0.267963	-1.89989
orf19.1344	4.1508	15.6592	3.70735	1.89039		orf19.3448	17.9889	4.6518	0.262691	-1.92856
orf19.4476	3.5516	12.3708	3.41516	1.77195		SOD4	27.1057	7.035	0.262261	-1.93092
orf19.6864	4.2595	14.6733	3.38876	1.76076		OPT1	25.4213	6.1014	0.242989	-2.04104
orf19.4391	3.2039	10.4675	3.19849	1.67739		RFC52	17.8012	3.9701	0.227365	-2.13692
orf19.7214	6.8687	20.2486	2.92	1.54597
orf19.5861.1	4.6535	13.7672	2.91726	1.54461
CEK1	5.8243	16.7183	2.83887	1.50532
WH11	3.9304	11.0871	2.77568	1.47284
orf19.2445	4.4574	11.9099	2.63525	1.39794
orf19.6311	5.0027	13.2347	2.61326	1.38585
orf19.4771	7.2815	19.1696	2.61053	1.38434
orf19.3827	9.5094	23.0062	2.40454	1.26576
orf19.6117	6.8391	16.2497	2.35617	1.23644
INO1	7.8897	17.9787	2.26275	1.17808
FAV2	8.0196	17.7291	2.19581	1.13475
DPP3	5.2567	11.6453	2.19264	1.13267
MUM2	9.8299	21.5491	2.18019	1.12446
FGR22	5.2806	11.4202	2.14106	1.09833
orf19.3828	5.2016	10.9772	2.08941	1.06309
SKN1	9.8563	19.4572	1.9643	0.974018
orf19.6554	9.1257	18.001	1.96202	0.972339
CCH1	9.4659	18.4546	1.93966	0.955804
orf19.7299.1	7.9143	15.0457	1.88983	0.91826
BMT3	9.1007	16.5949	1.81452	0.859592
orf19.6474	9.1196	16.5872	1.80997	0.855966
orf19.3461	8.0107	14.5479	1.806	0.852796
MNN15	8.4836	15.387	1.80425	0.851403
orf19.6030	6.4964	11.6642	1.78343	0.834652
IRS4	8.3619	14.9032	1.77303	0.826217
INN1	9.7772	17.1706	1.74853	0.806144
orf19.2074	6.348	11.1407	1.74328	0.801808
orf19.3238	5.9376	10.1973	1.70553	0.770219
orf19.2431	9.5283	16.2467	1.69778	0.763646
RCN1	6.4302	10.9689	1.69503	0.761313
orf19.4893	8.1808	13.7928	1.67771	0.746495
SAP10	8.3861	14.0926	1.67245	0.741965
orf19.1830	8.6298	14.3453	1.65471	0.72658
orf19.1258	7.9667	13.1606	1.64387	0.717096
orf19.5129	8.9924	14.6679	1.6242	0.699732
CAN2	6.3966	10.4324	1.62122	0.697077
CUE5	8.0592	13.0076	1.60648	0.683904
orf19.2863	8.66	13.9426	1.60304	0.680807
NCE103	6.8755	11.0377	1.59669	0.675083
orf19.7069	9.6552	15.2835	1.57695	0.65714
POT1	8.5294	13.4511	1.57034	0.651078
orf19.4792	9.0217	14.1779	1.56527	0.646409
orf19.3737	9.4201	14.7704	1.562	0.643395
ECM1	7.9569	12.4475	1.55736	0.639103
orf19.2813	9.7754	15.2736	1.55676	0.638544
NAT4	6.7633	10.5344	1.54946	0.631764
orf19.6083	9.7338	15.1243	1.54816	0.630555
orf19.7457	7.2741	11.2967	1.5455	0.628077
FOX2	7.0962	10.9278	1.53245	0.615838
orf19.1632	7.6871	11.7512	1.5219	0.605875
orf19.86	9.2586	14.0652	1.5136	0.597986
orf19.2888	7.6939	11.6816	1.51164	0.596118
CRG1	8.2525	12.5236	1.51136	0.595843
orf19.8278	9.4736	14.3689	1.51133	0.595822
orf19.5614	9.5165	14.4225	1.51016	0.594706
ASR1	9.5795	14.4883	1.50713	0.591807
orf19.2769	9.6152	14.5361	1.50652	0.591216
orf19.6306	8.3028	12.5001	1.49951	0.584493
DOT5	9.2676	13.8734	1.49167	0.576932
KTR4	8.8312	13.1763	1.48651	0.571927
orf19.247	8.2424	12.2941	1.48568	0.571119
YSA1	6.9292	10.3407	1.48533	0.570786
ENA2	8.6737	12.8876	1.48029	0.565878
orf19.2269	8.7666	12.9975	1.47717	0.562839
orf19.5070	7.8515	11.4414	1.45147	0.537519
CAT2	9.3586	13.5805	1.5	0.532422
orf19.4216	8.0545	11.6904	1.5	0.531944
orf19.192	8.5399	12.3872	1.5	0.531363

## Sheet: 2. Cas5-dependent caspo induced
A list of genes that require Cas5 for increased RNA PolII occupancy in response to caspofungin.
Cas5-dependent caspofungin induced genes (163)
RTA4
orf19.6527
orf19.4376
CZF1
FGR6-1
PGA1
MNN12
orf19.4666
MOB2
ZCF39
BMT6
CHS3
FGR6-10
HOS3
HPA2
MXR1
orf19.7598
WSC2
orf19.5869
orf19.1409.2
orf19.7125
orf19.3328
orf19.916
orf19.6090
orf19.1658
ECM21
DPM1
GSC1
FGR6-3
LAG1
CRZ2
OPY2
SMP2
DDI1
VPS27
orf19.675.1
orf19.4596
GNA1
FGR6-4
orf19.4780
SEC18
orf19.7260
AUR1
SIP5
orf19.1765
orf19.1953
TPK1
GLX3
SFU1
orf19.3123.2
PGA33
AAF1
orf19.5775
orf19.246
HGC1
orf19.5290
KRE9
orf19.2123
TUS1
orf19.374
DFI1
orf19.2049
PCL1
orf19.6879
orf19.2203.1
orf19.3501
orf19.3815
MID1
orf19.1910
SSR1
orf19.3994
WSC1
orf19.3535
PGA6
orf19.7341.1
BMT4
DAG7
orf19.6660
GLN1
orf19.727
orf19.2680
orf19.3919
orf19.7085
orf19.25
PDE2
orf19.1374
orf19.6264.3
orf19.3259
UBI4
orf19.5518
CCN1
ECM29
AKR1
BGL2
orf19.4134
RFX1
orf19.7109
orf19.2565
orf19.433
orf19.5352
ECM331
orf19.7567
VPS1
MNN2
JEM1
orf19.783
orf19.3928
orf19.376
orf19.4563
orf19.5517
PTP3
BRG1
ACO1
ERO1
CPP1
GAP6
orf19.674
YKE2
orf19.4711
PGA13
SPS20
ROT1
GDH2
orf19.2204
orf19.4046
ACT1
PIN3
CAS5
HSE1
orf19.2459
orf19.1667.1
orf19.7210
orf19.4894
orf19.782
orf19.2925
ALS1
CHO1
ITR1
orf19.3080
PGA54
orf19.3826
orf19.1208
CSH1
orf19.3219
orf19.3854
orf19.372
orf19.5006.1
orf19.1430
orf19.5431
orf19.3087.2
ARE2
orf19.2308
orf19.7110
RHR2
MNN1
BMT7
TVP18
orf19.3309
STP4
orf19.4263
orf19.6608
SWE1
PLB3

## Sheet: 3. GO process - UP genes
GO processes of genes that require Cas5 for increased RNA PolII occupancy in response to caspofungin.
GOID	Go term	Cluster frequency	Background frequency	Corrected P-value	False discovery rate	Gene(s) annotated to the term	Directly Annotated GOID List
71554	cell wall organization or biogenesis	23 out of 163 genes, 14.1%	268 out of 13081 background genes, 2.0%	7.45e-06	0	MOB2:ROT1:GSC1:PDE2:TUS1:DPM1:OPY2:TPK1:MNN2:CHO1:CHS3:ACT1:KRE9:WSC1:CAS5:BGL2:C4_04560C_A:MID1:WSC2:BMT4:SSR1:PGA13:PGA1	43936:920:916:30448:36178:5975:1900445:43709:31579:44114:70887:1900240:30447:6281:9306:9272:1901196:6078:70417:6458:1900231:71852:6646:6486:11:45761:71216:6468:71260:902:30476:48869:30950:7163:32512:6659:6488:10895:42546:1900435:6487:61393:6816:6950:6827:90002:1900436:31505:199:30010:751:70317:1900189:1766:10512:36176:6038:1300:36244:1900432:7231:43967:71554:44117:44406:43486:98703:9826:36168:714…
71852	fungal-type cell wall organization or biogenesis	21 out of 163 genes, 12.9%	242 out of 13081 background genes, 1.9%	2.84e-05	0	MOB2:ROT1:GSC1:PDE2:TUS1:DPM1:OPY2:TPK1:CHO1:CHS3:ACT1:KRE9:WSC1:CAS5:BGL2:C4_04560C_A:MID1:WSC2:SSR1:PGA13:PGA1	43936:920:916:30448:36178:5975:1900445:43709:31579:44114:70887:1900240:30447:6281:9306:9272:1901196:6078:70417:6458:1900231:71852:6646:11:45761:71216:6468:71260:902:30476:48869:30950:7163:32512:6659:6488:10895:42546:1900435:6487:61393:6816:6950:90002:1900436:31505:199:30010:751:70317:1900189:1766:10512:36176:6038:1300:36244:1900432:7231:43967:71554:44117:44406:43486:98703:9826:36168:71474:44182:1…
90609	single-species submerged biofilm formation	15 out of 163 genes, 9.2%	131 out of 13081 background genes, 1.0%	7.71e-05	0	C1_00160C_A:MOB2:HGC1:PDE2:CSH1:BRG1:RHR2:CAS5:BGL2:CZF1:VPS1:ALS1:CRZ2:ZCF39:PGA1	1900735:920:30448:36178:5975:1900445:30036:43709:1900443:31579:44114:71468:9372:1900240:30447:44416:43710:71280:60988:70417:1900231:71216:1900241:48869:1900442:7163:10895:1900435:61393:45053:6114:31505:7160:1900189:36176:321:36166:36244:1900432:6623:44117:44406:1900430:1900239:36168:71474:44182:19933:36180:6071:7155:36164:71470:44409:7118:1900429:22604:10811:6355:7009:43689:9267:44011:122:79:1934…
90605	submerged biofilm formation	15 out of 163 genes, 9.2%	134 out of 13081 background genes, 1.0%	0.0001	0	C1_00160C_A:MOB2:HGC1:PDE2:CSH1:BRG1:RHR2:CAS5:BGL2:CZF1:VPS1:ALS1:CRZ2:ZCF39:PGA1	1900735:920:30448:36178:5975:1900445:30036:43709:1900443:31579:44114:71468:9372:1900240:30447:44416:43710:71280:60988:70417:1900231:71216:1900241:48869:1900442:7163:10895:1900435:61393:45053:6114:31505:7160:1900189:36176:321:36166:36244:1900432:6623:44117:44406:1900430:1900239:36168:71474:44182:19933:36180:6071:7155:36164:71470:44409:7118:1900429:22604:10811:6355:7009:43689:9267:44011:122:79:1934…
44010	single-species biofilm formation	15 out of 163 genes, 9.2%	136 out of 13081 background genes, 1.0%	0.00012	0	C1_00160C_A:MOB2:HGC1:PDE2:CSH1:BRG1:RHR2:CAS5:BGL2:CZF1:VPS1:ALS1:CRZ2:ZCF39:PGA1	1900735:920:30448:36178:5975:1900445:30036:43709:1900443:31579:44114:71468:9372:1900240:30447:44416:43710:71280:60988:70417:1900231:71216:1900241:48869:1900442:7163:10895:1900435:61393:45053:6114:31505:7160:1900189:36176:321:36166:36244:1900432:6623:44117:44406:1900430:1900239:36168:71474:44182:19933:36180:6071:7155:36164:71470:44409:7118:1900429:22604:10811:6355:7009:43689:9267:44011:122:79:1934…
42710	biofilm formation	15 out of 163 genes, 9.2%	144 out of 13081 background genes, 1.1%	0.00027	0	C1_00160C_A:MOB2:HGC1:PDE2:CSH1:BRG1:RHR2:CAS5:BGL2:CZF1:VPS1:ALS1:CRZ2:ZCF39:PGA1	1900735:920:30448:36178:5975:1900445:30036:43709:1900443:31579:44114:71468:9372:1900240:30447:44416:43710:71280:60988:70417:1900231:71216:1900241:48869:1900442:7163:10895:1900435:61393:45053:6114:31505:7160:1900189:36176:321:36166:36244:1900432:6623:44117:44406:1900430:1900239:36168:71474:44182:19933:36180:6071:7155:36164:71470:44409:7118:1900429:22604:10811:6355:7009:43689:9267:44011:122:79:1934…
44764	multi-organism cellular process	20 out of 163 genes, 12.3%	258 out of 13081 background genes, 2.0%	0.00038	0	C1_00160C_A:MOB2:HGC1:PDE2:CSH1:BRG1:OPY2:CPP1:JEM1:RHR2:CAS5:BGL2:C4_03110W_A:CZF1:VPS1:MID1:ALS1:CRZ2:ZCF39:PGA1	1900735:920:30448:36178:5975:1900445:30036:43709:200:1900443:31579:44114:71468:9372:6886:1900240:30447:44416:30433:71701:43710:9272:71280:1901196:60988:1402:70417:1900231:71216:1900241:71260:48869:1900442:1900444:7163:32512:742:10895:1900435:61393:45053:6816:6114:90002:1900436:31505:751:7160:1900189:36176:60237:321:36166:36244:1900432:7231:6623:44117:71511:44406:1900430:1900239:98703:9826:6457:36…
31505	fungal-type cell wall organization	16 out of 163 genes, 9.8%	177 out of 13081 background genes, 1.4%	0.00075	0	MOB2:GSC1:PDE2:TUS1:TPK1:CHS3:ACT1:KRE9:CAS5:BGL2:C4_04560C_A:MID1:WSC2:SSR1:PGA13:PGA1	920:916:30448:36178:5975:1900445:43709:31579:44114:70887:1900240:30447:6281:9306:1901196:6078:70417:1900231:11:45761:71216:6468:71260:902:30476:48869:7163:32512:10895:42546:1900435:61393:6816:31505:30010:1900189:1766:36176:6038:1300:36244:1900432:43967:44117:44406:43486:98703:9826:36168:71474:44182:19933:33554:36180:36164:35023:1903475:7118:1900429:22604:10811:1900188:6355:6075:7009:48543:7266:34…
45229	external encapsulating structure organization	16 out of 163 genes, 9.8%	178 out of 13081 background genes, 1.4%	0.00081	0	MOB2:GSC1:PDE2:TUS1:TPK1:CHS3:ACT1:KRE9:CAS5:BGL2:C4_04560C_A:MID1:WSC2:SSR1:PGA13:PGA1	920:916:30448:36178:5975:1900445:43709:31579:44114:70887:1900240:30447:6281:9306:1901196:6078:70417:1900231:11:45761:71216:6468:71260:902:30476:48869:7163:32512:10895:42546:1900435:61393:6816:31505:30010:1900189:1766:36176:6038:1300:36244:1900432:43967:44117:44406:43486:98703:9826:36168:71474:44182:19933:33554:36180:36164:35023:1903475:7118:1900429:22604:10811:1900188:6355:6075:7009:48543:7266:34…
71555	cell wall organization	16 out of 163 genes, 9.8%	178 out of 13081 background genes, 1.4%	0.00081	0	MOB2:GSC1:PDE2:TUS1:TPK1:CHS3:ACT1:KRE9:CAS5:BGL2:C4_04560C_A:MID1:WSC2:SSR1:PGA13:PGA1	920:916:30448:36178:5975:1900445:43709:31579:44114:70887:1900240:30447:6281:9306:1901196:6078:70417:1900231:11:45761:71216:6468:71260:902:30476:48869:7163:32512:10895:42546:1900435:61393:6816:31505:30010:1900189:1766:36176:6038:1300:36244:1900432:43967:44117:44406:43486:98703:9826:36168:71474:44182:19933:33554:36180:36164:35023:1903475:7118:1900429:22604:10811:1900188:6355:6075:7009:48543:7266:34…
44011	single-species biofilm formation on inanimate substrate	13 out of 163 genes, 8.0%	119 out of 13081 background genes, 0.9%	0.00097	0	C1_00160C_A:MOB2:HGC1:CSH1:BRG1:RHR2:CAS5:BGL2:CZF1:VPS1:ALS1:CRZ2:ZCF39	1900735:920:30448:36178:5975:1900445:43709:30036:1900443:31579:44114:71468:9372:30447:44416:43710:71280:60988:70417:1900231:71216:1900241:1900442:7163:10895:61393:45053:6114:31505:7160:1900189:321:36166:36244:6623:44117:44406:1900430:1900239:71474:44182:36180:6071:7155:36164:71470:44409:7118:10811:6355:43689:9267:44011:122:79:1934:2000100:30866:6897:1900233:16337:36170:16559:6357:44407:9405:35690…
51703	intraspecies interaction between organisms	13 out of 163 genes, 8.0%	119 out of 13081 background genes, 0.9%	0.00097	0	C1_00160C_A:MOB2:HGC1:CSH1:BRG1:RHR2:CAS5:BGL2:CZF1:VPS1:ALS1:CRZ2:ZCF39	1900735:920:30448:36178:5975:1900445:43709:30036:1900443:31579:44114:71468:9372:30447:44416:43710:71280:60988:70417:1900231:71216:1900241:1900442:7163:10895:61393:45053:6114:31505:7160:1900189:321:36166:36244:6623:44117:44406:1900430:1900239:71474:44182:36180:6071:7155:36164:71470:44409:7118:10811:6355:43689:9267:44011:122:79:1934:2000100:30866:6897:1900233:16337:36170:16559:6357:44407:9405:35690…
40007	growth	34 out of 163 genes, 20.9%	693 out of 13081 background genes, 5.3%	0.00218	0	MOB2:ROT1:HGC1:PDE2:BRG1:FGR6-3:CPP1:TPK1:MNN2:CHO1:CHS3:ACT1:STP4:FGR6-4:KRE9:WSC1:AAF1:ECM29:UBI4:CAS5:BGL2:FGR6-10:CZF1:VPS1:CCN1:PCL1:MID1:ALS1:FGR6-1:LAG1:PGA13:RTA4:ZCF39:PGA1	43936:32878:916:36178:1900445:51726:30036:43709:200:1900443:31579:30011:1900240:30447:6281:71701:9272:60988:1402:70417:6458:16239:6486:11:6468:30476:71260:30950:32512:6659:34605:10895:61393:6816:6827:199:30010:1900189:1766:10512:36176:43248:6038:321:36166:1300:36244:1900432:43967:71554:44406:1900239:98703:71474:44182:19933:34975:33554:7155:35269:16567:82:1903475:22604:10811:6355:43689:48543:34599…
51704	multi-organism process	32 out of 163 genes, 19.6%	636 out of 13081 background genes, 4.9%	0.00266	0	C1_00160C_A:MOB2:VPS27:HGC1:GSC1:PDE2:CSH1:BRG1:OPY2:CPP1:SWE1:MNN2:CHS3:ACT1:GNA1:JEM1:RHR2:AAF1:UBI4:SPS20:CAS5:BGL2:C4_03110W_A:CZF1:VPS1:MID1:ALS1:HSE1:CRZ2:ACO1:ZCF39:PGA1	90154:916:36178:1900445:30036:43709:200:1900443:31579:71468:1900240:30447:6281:71701:9272:71280:60988:1402:70417:6486:11:6468:71260:30476:32512:34605:742:10895:61393:6816:8361:6827:6114:90002:1900436:30010:751:7160:1900189:1766:36176:6038:321:36166:1300:86:36244:1900432:43967:44406:1900239:98703:71474:44182:2:34975:19933:33554:6071:7155:16567:320:71470:44409:1903475:22604:10811:749:6355:6812:4368…
30447	filamentous growth	32 out of 163 genes, 19.6%	674 out of 13081 background genes, 5.2%	0.00897	0	MOB2:HGC1:PDE2:BRG1:FGR6-3:CPP1:TPK1:MNN2:CHO1:CHS3:ACT1:STP4:FGR6-4:KRE9:WSC1:AAF1:ECM29:UBI4:CAS5:FGR6-10:CZF1:VPS1:CCN1:PCL1:MID1:ALS1:FGR6-1:LAG1:PGA13:RTA4:ZCF39:PGA1	43936:32878:916:36178:1900445:51726:30036:43709:200:1900443:31579:30011:1900240:30447:6281:71701:60988:1402:70417:16239:6486:11:6468:30476:71260:32512:6659:34605:10895:61393:6816:6827:199:30010:1900189:1766:10512:36176:43248:6038:321:36166:1300:36244:1900432:43967:71554:44406:1900239:98703:71474:44182:19933:33554:7155:16567:82:1903475:22604:10811:6355:43689:48543:34599:6644:9267:44011:30100:79:60…
43900	regulation of multi-organism process	12 out of 163 genes, 7.4%	133 out of 13081 background genes, 1.0%	0.01814	0	MOB2:BRG1:CPP1:TPK1:AKR1:CAS5:CZF1:ALS1:CRZ2:PGA13:ZCF39:PTP3	36178:1900445:43709:10969:200:1900443:31579:71468:30447:71701:71280:1402:70417:6468:6612:10895:61393:10972:1900189:36166:36244:44406:1900239:71474:44182:33554:7155:10811:6355:1990264:43689:9267:44011:30100:60257:1934:754:45014:36171:1900233:16337:36170:9405:30260:1900735:920:30448:44114:70887:9372:44416:43710:1900231:71216:1900241:902:1900444:7163:43937:1900435:31505:18345:173:60237:71511:1900430…
32989	cellular component morphogenesis	10 out of 163 genes, 6.1%	97 out of 13081 background genes, 0.7%	0.02781	0	VPS27:GSC1:SWE1:TPK1:CHS3:ACT1:UBI4:MID1:LAG1:HSE1	90154:916:30447:6281:11:6468:71260:30476:32512:34605:6816:8361:30010:1766:6038:36166:1300:86:43967:98703:44182:33554:16567:320:1903475:48543:44879:34599:10697:30100:79:747:36171:9405:1904669:71963:30448:70887:9306:1901196:1900231:43328:45761:902:45053:31505:31321:43486:9826:40020:1900188:6075:7009:1900438:1302:6897:35690:46513
7155	cell adhesion	8 out of 163 genes, 4.9%	62 out of 13081 background genes, 0.5%	0.0335	0	PDE2:CSH1:RHR2:AAF1:C4_02260C_A:ALS1:DFI1:PGA1	36178:43709:1900240:30447:6114:7160:36176:36244:1900432:44406:44182:19933:6071:7155:71470:44409:22604:6355:43689:9267:44011:16337:36170:71244:9405:30260:1900735:30448:44416:43710:71216:48869:1900435:31505:36168:36180:36164:1900429:7009:35690:6878
44182	filamentous growth of a population of unicellular organisms	24 out of 163 genes, 14.7%	465 out of 13081 background genes, 3.6%	0.03456	0	MOB2:HGC1:PDE2:BRG1:FGR6-3:CPP1:TPK1:MNN2:CHO1:FGR6-4:KRE9:ECM29:UBI4:FGR6-10:CZF1:VPS1:CCN1:PCL1:ALS1:LAG1:PGA13:RTA4:ZCF39:PGA1	32878:36178:1900445:51726:30036:43709:200:1900443:31579:30011:1900240:30447:71701:60988:1402:16239:6486:6468:6659:34605:6827:1900189:10512:36176:43248:321:36166:36244:1900432:71554:44406:1900239:44182:19933:33554:7155:16567:82:22604:10811:6355:43689:6644:9267:44011:79:60257:46354:1934:754:97237:36171:1900233:16337:36170:16559:71244:9405:30260:1900735:920:30448:70887:44114:9372:44416:43710:6078:19…
44419	interspecies interaction between organisms	19 out of 163 genes, 11.7%	323 out of 13081 background genes, 2.5%	0.04059	0	VPS27:HGC1:GSC1:PDE2:CSH1:BRG1:CPP1:SWE1:MNN2:CHS3:GNA1:RHR2:AAF1:UBI4:CAS5:BGL2:ALS1:ACO1:PGA1	90154:36178:1900445:43709:200:1900240:30447:71701:1402:70417:6486:6468:71260:30476:34605:10895:61393:8361:6827:6114:7160:1900189:36176:6038:321:36166:86:36244:1900432:44406:71474:44182:2:19933:33554:6071:7155:16567:320:71470:44409:22604:10811:6355:43689:44879:9267:44011:10697:79:46354:754:1900233:16337:36170:71244:44407:9405:30260:1904669:1900735:30448:5975:44114:6099:44416:43710:43328:71216:902:…
9607	response to biotic stimulus	18 out of 163 genes, 11.0%	305 out of 13081 background genes, 2.3%	0.06168	0	MOB2:HGC1:PDE2:BRG1:FGR6-3:CPP1:MNN2:CHO1:FGR6-4:KRE9:ECM29:FGR6-10:CZF1:CCN1:ALS1:ACO1:RTA4:ZCF39	36178:1900445:51726:43709:200:1900443:31579:30011:1900240:30447:71701:1402:6486:6659:6827:1900189:10512:36176:43248:321:36166:36244:1900432:71554:44406:1900239:44182:2:19933:7155:82:22604:10811:6355:43689:6644:9267:44011:79:46354:1934:754:97237:36171:1900233:16337:36170:71244:9405:30260:1900735:920:30448:70887:44114:9372:6099:44416:43710:6078:1900231:71852:6646:71216:1900241:48869:1900442:1900444…
9605	response to external stimulus	20 out of 163 genes, 12.3%	364 out of 13081 background genes, 2.8%	0.06654	0	MOB2:PDE2:BRG1:SIP5:FGR6-3:CPP1:MNN2:CHO1:CHS3:FGR6-4:GLX3:ECM29:FGR6-10:CZF1:MID1:ALS1:GLN1:ACO1:RTA4:PTP3	36178:1900445:43709:200:1900443:31579:1900240:30447:71701:1402:6486:30476:71260:32512:6659:6995:6816:6827:10972:1900189:10512:36176:43248:6038:36166:36244:1900432:71554:44406:1900239:98703:44182:2:19933:7155:19676:22604:10811:6355:1990264:43689:48543:34599:6644:9267:44011:46354:1934:754:747:45014:36171:1900233:16337:36170:71244:9405:30260:1900735:920:30448:6542:70887:9372:6099:19243:44416:43710:1…
22610	biological adhesion	9 out of 163 genes, 5.5%	88 out of 13081 background genes, 0.7%	0.07263	0	PDE2:CSH1:RHR2:AAF1:BGL2:C4_02260C_A:ALS1:DFI1:PGA1	36178:43709:1900240:30447:6114:7160:36176:36244:1900432:44406:44182:19933:6071:7155:71470:44409:22604:6355:43689:9267:44011:16337:36170:71244:44407:9405:30260:1900735:30448:5975:44416:43710:71216:48869:1900435:31505:44117:36168:36180:36164:1900429:7009:35690:6878
36180	filamentous growth of a population of unicellular organisms in response to biotic stimulus	16 out of 163 genes, 9.8%	255 out of 13081 background genes, 1.9%	0.07619	0	MOB2:HGC1:PDE2:BRG1:FGR6-3:CPP1:MNN2:CHO1:FGR6-4:KRE9:ECM29:FGR6-10:CZF1:CCN1:RTA4:ZCF39	36178:1900445:51726:43709:200:1900443:31579:30011:1900240:30447:71701:1402:6486:6659:6827:1900189:10512:36176:43248:321:36166:36244:1900432:71554:44406:1900239:44182:19933:82:22604:10811:6355:6644:9267:44011:79:46354:1934:754:97237:36171:1900233:36170:71244:9405:920:30448:70887:44114:9372:6078:1900231:71852:6646:71216:1900241:48869:1900442:1900444:7163:42546:1900435:31505:70317:60237:71511:190043…
71900	regulation of protein serine/threonine kinase activity	7 out of 163 genes, 4.3%	52 out of 13081 background genes, 0.4%	0.0766	0	HGC1:CPP1:SWE1:WSC1:CCN1:PCL1:PTP3	43936:32878:90154:36178:1900445:51726:200:30011:30447:71701:1402:16239:6468:34605:8361:10972:199:321:86:36244:44182:320:82:1990264:44879:9267:44011:10697:79:754:70787:45014:36171:36170:9405:30448:70887:44114:71852:71216:902:1900442:1900444:43937:1900435:6950:173:60237:71511:1900430:1903936:188:36180:31106:32880:40020:35335:6470:7165:35690
71496	cellular response to external stimulus	18 out of 163 genes, 11.0%	316 out of 13081 background genes, 2.4%	0.09686	0	MOB2:PDE2:BRG1:SIP5:FGR6-3:CPP1:MNN2:CHO1:CHS3:FGR6-4:GLX3:ECM29:FGR6-10:CZF1:MID1:GLN1:RTA4:PTP3	36178:1900445:43709:200:1900443:31579:1900240:30447:71701:1402:6486:30476:71260:32512:6659:6995:6816:6827:10972:1900189:10512:36176:43248:6038:36166:36244:1900432:71554:44406:1900239:98703:44182:19933:19676:22604:10811:6355:1990264:48543:34599:6644:9267:44011:46354:1934:754:747:45014:36171:1900233:36170:71244:9405:920:30448:6542:70887:9372:19243:1901196:1900231:71852:6646:71216:1900241:42149:4886…

## Sheet: 4. GO component - UP genes
GO components of genes that require Cas5 for increased RNA PolII occupancy in response to caspofungin.
GOID	Go term	Cluster frequency	Background frequency	Corrected P-value	False discovery rate	Gene(s) annotated to the term	Directly Annotated GOID List
9986	cell surface	15 out of 163 genes, 9.2%	207 out of 13081 background genes, 1.6%	0.00085	0	CSH1:PGA6:CHS3:ACT1:PGA33:KRE9:BGL2:PGA54:ECM331:MID1:ALS1:SSR1:PGA13:PLB3:PGA1	131:5628:5829:9986:812:142:5739:32432:5783:31011:30864:46658:324:30479:5884:51286:9514:5886:35267:9277:15629:5933:1411:30428:5935:42597:43332:30445:45009:5576:30446
5933	cellular bud	13 out of 163 genes, 8.0%	189 out of 13081 background genes, 1.4%	0.00631	0.02	MOB2:GSC1:TUS1:SWE1:CHS3:C1_13690C_A:ACT1:C2_05040C_A:C3_01890C_A:HOS3:C4_04560C_A:C6_02090C_A:WSC2	5628:9986:812:32432:31011:30864:324:51286:9514:5934:16021:5886:35267:15629:30658:32153:5935:45009:148:51285:5737:131:5768:5829:142:5783:5938:30479:5884:5933:5634:1411:30428:5802:43332:31201
30427	site of polarized growth	15 out of 163 genes, 9.2%	264 out of 13081 background genes, 2.0%	0.01482	0.0133	MOB2:GSC1:TUS1:SWE1:CHS3:SEC18:C1_13690C_A:ACT1:C2_05040C_A:C3_01890C_A:HOS3:C4_03110W_A:C4_04560C_A:C6_02090C_A:WSC2	5628:9986:812:32432:31011:30864:324:70867:51286:9514:5934:16021:5886:35267:15629:30658:32153:5935:45009:148:51285:5737:5768:131:5829:142:5783:5794:5938:30479:5884:30140:5933:5634:5802:30428:1411:31201:43332
5935	cellular bud neck	10 out of 163 genes, 6.1%	147 out of 13081 background genes, 1.1%	0.05313	0.04	MOB2:GSC1:TUS1:SWE1:CHS3:ACT1:C2_05040C_A:C3_01890C_A:HOS3:C6_02090C_A	5628:9986:812:32432:31011:30864:324:51286:9514:5934:16021:5886:35267:15629:32153:5935:45009:148:5737:131:5829:142:5783:5938:30479:5884:5933:5634:30428:1411:43332
71944	cell periphery	30 out of 163 genes, 18.4%	871 out of 13081 background genes, 6.7%	0.07885	0.032	MOB2:GSC1:CSH1:DPM1:OPY2:PGA6:MNN12:C1_13690C_A:ACT1:DDI1:C2_00750W_A:ITR1:C3_01890C_A:GLX3:KRE9:WSC1:PIN3:UBI4:BGL2:C4_03110W_A:VPS1:C5_01440C_A:ECM331:MID1:ALS1:DFI1:SSR1:CR_01720W_A:PGA13:PLB3	42175:5628:9986:812:32432:31011:30864:46658:324:70867:51286:9514:5934:329:16021:5886:35267:5770:15629:30658:1990429:5887:32153:5935:42597:30445:148:30446:51285:5768:5829:71561:142:5739:5777:5783:5794:5938:30479:932:5884:97311:71944:30140:9277:5933:16020:5634:5802:30428:1411:31201:43332:10494:5576:5741
