# Supplementary material for: The Candida albicans transcription factor Cas5 couples stress responses, drug resistance and cell cycle regulation
Source: Nat Commun. 2017 Sep 11;8:499. doi: 10.1038/s41467-017-00547-y (PMC5593949; doi:10.1038/s41467-017-00547-y)
Supplement: Supplementary file 5 — Supplementary Data 4 [file 41467_2017_547_MOESM5_ESM.xlsx]

## Sheet: Legend
Supplementary Data 4 - RNA PolII ChIP-seq data comparing wild type and cas5∆/cas5∆ mutant strains under caspofungin treatment condition.
Sheet 1: Normalized RNA PolII occupancy of differentially bound genes between cas5∆/cas5∆ mutant and the wild type strain under caspofungin treatment condition.
The ORF numbers under gene names are derived from Genome Assembly 21.
All genes with greater than 1.5-fold change in RNA PolII binding are listed.
A negative Log2FC indicates that the gene was bound by RNA PolII at higher levels in the wild type strain than in the cas5∆/cas5∆.
Sheet 2: Common and unique differentially bound genes in the cas5∆/cas5∆ mutant in comparison to the wild type strain in the presence and absence of caspofungin treatment.
The ORF numbers under gene names are derived from Genome Assembly 21.
Sheet 3: GO processes of all genes with increased RNA PolII occupancy in cas5∆/cas5∆ mutant in comparison to the wild type strain under caspofungin treatment condition.
The gene names are derived from Genome Assembly 22.
The genes are categorized by processes using CGD GO Term finder function.
Only GO processes with a corrected P-value of < 0.1 are included.
Sheet 4: GO processes of all genes with decreased RNA PolII occupancy in cas5∆/cas5∆ mutant in comparison to the wild type strain under caspofungin treatment condition.
The gene names are derived from Genome Assembly 22.
The genes are categorized by processes using CGD GO Term finder function.
Only GO processes with a corrected P-value of < 0.1 are included.
Sheet 5: GO components of all genes with increased RNA PolII occupancy in cas5∆/cas5∆ mutant in comparison to the wild type strain under caspofungin treatment condition.
The gene names are derived from Genome Assembly 22.
The genes are categorized by processes using CGD GO Term finder function.
Only GO processes with a corrected P-value of < 0.1 are included.
Sheet 6: GO components of all genes with decreased RNA PolII occupancy in cas5∆/cas5∆ mutant in comparison to the wild type strain under caspofungin treatment condition.
The gene names are derived from Genome Assembly 22.
The genes are categorized by processes using CGD GO Term finder function.
Only GO processes with a corrected P-value of < 0.1 are included.
Sheet 7: KEGG analysis of differentially bound genes in the cas5∆/cas5∆ mutant in comparison to the wild type strain under basal and caspofungin treatment conditions.
DBGs are differentially bound genes defined by genes with greater than 1.5 fold difference in PolII ChIPseq signals between the cas5∆/cas5∆ mutant and the wild type strain.
Pathways in gray are included in Figure 2c

## Sheet: 1. PolII occupancy
Normalized RNA PolII occupancy of differentially bound genes between cas5∆/cas5∆ mutant and the wild type strain under caspofungin treatment condition.
cas5∆/WT UP	PolII level		Fold change	Log2FC			cas5∆/WT DOWN	PolII level		Fold change	Log2FC
Gene names	WT	cas5∆/cas5∆	[cas5∆/WT]				Gene names	WT	cas5∆/cas5∆	[cas5∆/WT]
PHO87	3.1364	22.1592	6.87777	2.78194			CAS5	26.8461	1.1461	0.0462442	-4.43458
orf19.4921.1	7.4258	42.0913	5.60622	2.48703			PGA6	370.704	23.1715	0.0627596	-3.99402
GDH3	16.6464	69.8028	4.1742	2.0615			PCL1	54.1024	6.1545	0.115392	-3.11539
GCV2	10.3694	43.0501	4.12154	2.04319			GIT1	21.0452	2.9423	0.143877	-2.7971
FTR2	15.2118	57.3109	3.74945	1.90668			PCL2	34.5187	4.8817	0.143902	-2.79684
orf19.2061	5.7578	19.2068	3.29591	1.72068			CCN1	34.1066	5.1796	0.154344	-2.69577
orf19.1707	3.3482	11.2305	3.28592	1.7163			ECM331	52.2863	7.9893	0.154416	-2.6951
ADE13	7.9462	25.9793	3.24119	1.69653			MNN1	19.4401	3.2269	0.17026	-2.55419
ALD5	32.6224	102.756	3.14329	1.65227			GIT3	165.332	32.1226	0.194778	-2.36009
PGA31	4.2751	13.6188	3.13565	1.64877			PDC11	449.371	90.6714	0.201952	-2.30792
SNO1	9.0436	26.2161	2.87809	1.52511			ALS1	107.117	21.6869	0.203203	-2.299
SNZ1	26.4521	75.5844	2.85041	1.51117			CSH1	44.4454	9.0087	0.204481	-2.28996
orf19.6316.4	5.3753	15.3521	2.82215	1.49679			ADH1	718.484	148.943	0.207413	-2.26942
ADE6	6.4912	18.3385	2.79744	1.48411			orf19.5814.1	106.952	23.8682	0.223892	-2.15912
PHR1	19.1387	50.7239	2.64175	1.4015			orf19.33	175.756	39.6344	0.225949	-2.14593
SOD5	23.3458	61.2569	2.61697	1.3879			POL93	24.0875	6.0609	0.254714	-1.97305
FAV2	6.7376	17.7291	2.60751	1.38267			DDR48	277.478	71.7395	0.258809	-1.95004
orf19.3810	10.5287	27.4853	2.59536	1.37593			RNR22	17.2826	4.4224	0.260168	-1.94248
orf19.4814	6.0252	15.757	2.58881	1.37229			orf19.6117	62.3543	16.2497	0.261787	-1.93354
RPC19	6.9147	18.0436	2.58651	1.37101			QDR1	27.7427	7.3546	0.26774	-1.9011
orf19.6864	5.6731	14.6733	2.55899	1.35557			orf19.3461	53.8994	14.5479	0.27126	-1.88225
SHM2	20.1379	51.0715	2.5285	1.33828			orf19.1277	33.6402	9.0571	0.2714	-1.88151
orf19.2934	10.5775	26.8315	2.52227	1.33472			CRZ2	22.1758	6.0013	0.273898	-1.86829
PGA53	17.7151	44.8165	2.52126	1.33414			orf19.3694	22.2036	6.1138	0.278601	-1.84373
orf19.3978	4.7769	11.8323	2.4467	1.29084			orf19.7504	98.0811	27.3216	0.279296	-1.84013
ADE1	8.1663	19.5393	2.37583	1.24843			TYE7	86.165	24.2668	0.282464	-1.82386
FGR46	66.0721	154.866	2.34186	1.22765			PHO113	29.3036	8.4148	0.289584	-1.78795
NOP15	8.5998	20.1058	2.32256	1.21572			SWE1	28.9447	8.5887	0.299149	-1.74106
orf19.4211	10.5603	24.586	2.31569	1.21145			orf19.6079	28.2735	8.4159	0.300136	-1.73631
NCE103	4.7276	11.0377	2.30709	1.20607			orf19.5114.1	63.488	19.1791	0.303188	-1.72172
CAN2	4.4668	10.4324	2.3063	1.20558			orf19.3522	52.5602	16.5565	0.316301	-1.66063
SAM37	4.6542	10.6397	2.25899	1.17568			orf19.951	24.5434	7.7129	0.317038	-1.65727
ADE4	17.946	40.6077	2.25577	1.17362			orf19.733	24.5708	7.8637	0.322799	-1.63129
orf19.6311	5.8534	13.2347	2.23985	1.1634			orf19.3998	62.504	20.1963	0.324201	-1.62504
orf19.6828	6.0831	13.7153	2.23436	1.15986			SHA3	63.8162	20.9344	0.329093	-1.60343
orf19.5905	19.7983	44.012	2.21687	1.14853			DAG7	18.9845	6.1996	0.33009	-1.59907
CRD2	57.0374	125.641	2.20068	1.13795			BMT4	35.2798	11.8019	0.336404	-1.57173
CAM1	58.8467	128.649	2.18416	1.12708			orf19.5518	44.1387	14.7857	0.336486	-1.57138
orf19.1305	5.4759	12.0129	2.17237	1.11927			CRH11	203.138	68.9119	0.339562	-1.55825
SKO1	7.4065	16.1751	2.16813	1.11645			ADH2	28.0507	9.4987	0.340976	-1.55226
SER2	10.0675	21.277	2.10248	1.07209			orf19.1765	45.3468	15.3986	0.341027	-1.55204
CHA1	12.0556	25.178	2.07954	1.05626			RFC52	11.0511	3.9701	0.364995	-1.45405
RHD2	10.2652	21.1924	2.05422	1.03859			PHR2	195.525	71.529	0.366155	-1.44947
orf19.1030	8.0537	16.6315	2.05201	1.03704			TRY6	11.2935	4.0962	0.368298	-1.44106
RHD3	6.7109	13.8523	2.04853	1.03459			orf19.7077	76.4321	28.7271	0.376667	-1.40864
DIP5	14.0712	28.7645	2.03684	1.02633			orf19.6852.1	79.3706	30.1867	0.381106	-1.39174
ECM1	6.0654	12.4475	2.03515	1.02513			RTA2	320.265	124.501	0.388935	-1.3624
ADE5,7	9.5292	19.4101	2.02614	1.01873			orf19.2529.1	333.156	132.022	0.396457	-1.33476
KAR4	71.202	142.279	1.99684	0.997719			orf19.675	448.493	178.586	0.398326	-1.32798
orf19.2829	9.0033	18.0661	1.99555	0.996787			PHO84	317.908	130.931	0.412038	-1.27915
orf19.6247.1	12.0879	24.22	1.99542	0.996694			orf19.2175	10.5729	4.31	0.413196	-1.2751
orf19.1124	6.2009	12.4114	1.98565	0.989613			MUM2	52.0241	21.5491	0.415338	-1.26764
orf19.3220	8.1031	16.1365	1.97931	0.985			orf19.4942	38.1896	15.9044	0.417983	-1.25848
GUA1	16.6783	32.9258	1.96836	0.976997			FBA1	377.976	159.127	0.421151	-1.24759
orf19.7397.1	8.7927	17.2901	1.95555	0.967573			RTA4	25.6081	10.7543	0.422213	-1.24396
NIP7	10.3547	20.3277	1.95393	0.966375			GIN4	28.5091	11.9888	0.422551	-1.2428
HIT1	5.3383	10.5114	1.95123	0.964387			orf19.5267	11.7408	4.9108	0.423181	-1.24065
orf19.5364	37.7312	73.6529	1.94953	0.963123			RHR2	142.317	60.27	0.423897	-1.23821
MRT4	8.3124	16.2966	1.9491	0.962807			PGA13	13.1454	5.5261	0.424759	-1.23528
SEN2	38.5556	75.0594	1.94433	0.959276			CZF1	23.9019	10.2134	0.429691	-1.21863
ENP1	6.6524	12.912	1.92702	0.94637			orf19.4531	16.7636	7.181	0.431758	-1.2117
orf19.8278	7.4247	14.3689	1.92285	0.943249			orf19.6816	16.8858	7.2751	0.434192	-1.20359
orf19.1272	6.1471	11.9119	1.9228	0.943206			PGK1	170.531	74.0593	0.434617	-1.20218
ADE8	16.2277	31.1293	1.91266	0.935579			ENO1	442.889	194.426	0.439122	-1.1873
orf19.4949	161.397	308.375	1.9101	0.933647			orf19.1430	12.4197	5.4705	0.444939	-1.16832
YMC1	11.8684	22.7461	1.90887	0.932718			FGR6-4	52.5509	23.4201	0.446718	-1.16256
DIM1	5.7014	10.9623	1.90683	0.931178			BRG1	21.5561	9.5772	0.446858	-1.16211
orf19.1465	5.8764	11.2899	1.90581	0.930406			orf19.5614	32.2451	14.4225	0.448986	-1.15526
orf19.1708	6.8953	13.1467	1.89366	0.921175			RTA3	55.4042	24.8757	0.449979	-1.15207
SAM4	21.332	40.3979	1.8896	0.918081			orf19.6896	55.8724	25.1219	0.450613	-1.15004
RRP8	5.3166	10.1187	1.88655	0.915752			TDH3	662.56	299.454	0.452048	-1.14545
orf19.3585	10.8119	20.4434	1.88266	0.912773			orf19.727	42.602	19.2492	0.453122	-1.14203
TRM12	6.9093	13.0873	1.8814	0.911807			orf19.2125	119.202	54.7422	0.459693	-1.12126
NSA2	8.7921	16.5094	1.86788	0.901404			SOD3	51.1952	23.5241	0.460552	-1.11856
orf19.1609	5.6316	10.5701	1.86163	0.896564			FGR6-10	41.0816	18.89	0.461128	-1.11676
orf19.3572	9.2854	17.3517	1.85945	0.894877			FGR6-3	40.2879	18.6267	0.463671	-1.10883
YTM1	11.332	21.0936	1.85388	0.890551			orf19.1208	31.8868	14.7951	0.465664	-1.10264
orf19.4167	5.7362	10.6804	1.84716	0.885309			orf19.4706	152.222	71.4132	0.469485	-1.09085
CIC1	7.603	14.1279	1.84706	0.88523			GPM1	172.524	81.0389	0.470031	-1.08917
orf19.909.1	7.3183	13.5745	1.84335	0.882328			PGA23	53.6732	25.1789	0.470102	-1.08895
orf19.81	5.7844	10.7347	1.84126	0.880692			orf19.7085	26.583	12.5331	0.473451	-1.07871
KRR1	8.6934	16.0474	1.83631	0.876809			PFK1	35.8209	17.0302	0.476887	-1.06828
orf19.3113	7.1672	13.1515	1.82347	0.866684			UTR2	77.8001	37.1551	0.478242	-1.06419
MIS11	30.706	56.0637	1.82314	0.866427			orf19.5290	14.8559	7.0862	0.480493	-1.05741
orf19.2638.1	32.9677	60.1658	1.8225	0.865917			HGT7	160.475	77.6258	0.484046	-1.04678
orf19.5019	6.6245	12.0777	1.81095	0.856743			GLK1	15.9927	7.7165	0.485717	-1.04181
GCV3	26.6207	48.245	1.80927	0.855409			CTR1	260.816	126.658	0.485818	-1.04151
UTP15	8.6581	15.744	1.80907	0.855247			CDC19	210.419	102.327	0.486547	-1.03935
AAT1	13.7675	24.9454	1.80605	0.852838			orf19.2684	16.7509	8.112	0.487333	-1.03702
SPB1	8.1824	14.8477	1.80475	0.851803			FGR6-1	31.7473	15.4676	0.48882	-1.03262
RRP15	10.1741	18.4001	1.80065	0.848521			SCW11	20.6899	10.0842	0.489863	-1.02955
ENP2	6.5033	11.7796	1.79904	0.847227			MNN15	31.3101	15.387	0.493058	-1.02017
CCC1	25.5621	45.9499	1.79447	0.843559			PGA52	122.681	60.7047	0.495229	-1.01383
orf19.7398	9.1573	16.4847	1.79153	0.84119			PNG2	43.3773	21.6344	0.499902	-1.00028
HOL1	13.2357	23.7547	1.78878	0.83898			orf19.6840	80.5664	40.2451	0.500148	-0.999574
FAD2	15.9001	28.4522	1.7845	0.835521			KRE1	82.9171	41.4929	0.501016	-0.997071
LEU4	22.108	39.4739	1.78197	0.83347			CAR2	61.0963	30.5882	0.501471	-0.99576
NOG2	18.991	33.9002	1.78095	0.832651			RBE1	15.125	7.5463	0.50222	-0.993609
orf19.3831	13.839	24.6712	1.77711	0.829537			orf19.5775	30.0447	15.044	0.502377	-0.993158
orf19.1180	73.4501	130.511	1.7758	0.828473			BMT6	46.672	23.407	0.502587	-0.992555
orf19.6035	14.4695	25.5971	1.76376	0.818654			orf19.5475	114.908	58.0522	0.505634	-0.983834
PGA32	8.3898	14.8509	1.76104	0.81643			orf19.3216	15.9094	8.0457	0.508807	-0.974809
orf19.3954.1	9.0415	15.9948	1.76063	0.816092			orf19.5022	20.7273	10.5367	0.51071	-0.969425
orf19.4391	5.9032	10.4675	1.76031	0.81583			PFK2	66.5383	34.0155	0.51195	-0.965924
orf19.6731	31.6244	55.7098	1.75921	0.814926			orf19.5474	123.321	63.1681	0.512622	-0.964033
MEP1	11.2408	19.8093	1.75555	0.81192			RCT1	504.355	263.159	0.521867	-0.938245
MCM2	7.4291	13.114	1.75506	0.811518			VTC4	26.4963	13.7853	0.522076	-0.937667
orf19.7552	6.0804	10.7427	1.75437	0.810952			orf19.2204	35.6395	18.7185	0.526546	-0.925368
TRM2	18.7738	32.999	1.7537	0.810403			orf19.2308	57.836	30.4535	0.527366	-0.923122
QCR9	25.2132	44.1715	1.74895	0.806488			orf19.3048	14.4224	7.5672	0.527957	-0.921508
orf19.7624	20.9814	36.7066	1.74593	0.803994			WSC2	51.8647	27.372	0.528667	-0.91957
orf19.4324	7.2824	12.7309	1.73804	0.797461			DAK2	16.4575	8.655	0.528763	-0.919306
orf19.5885	33.2406	57.8365	1.73772	0.797192			orf19.5472	148.712	79.0197	0.531676	-0.911382
DEM1	22.1019	38.467	1.7371	0.796684			HOS3	16.7402	8.876	0.53301	-0.907765
KTI11	17.8423	30.9271	1.72927	0.790164			orf19.6608	19.2756	10.2556	0.534466	-0.90383
ARX1	11.2554	19.5348	1.72912	0.790034			orf19.711	166.56	89.095	0.535191	-0.901875
NOP14	6.0589	10.5458	1.72852	0.78954			orf19.2925	10.5968	5.6692	0.539339	-0.890736
orf19.1549	10.6252	18.4362	1.72828	0.789341			ERO1	36.253	19.5236	0.539807	-0.889485
orf19.1676	24.9072	42.812	1.71599	0.779038			MCD1	19.807	10.6749	0.541262	-0.885601
orf19.1800	6.42	11.0856	1.71558	0.778699			YOX1	40.9613	22.1921	0.542898	-0.881247
orf19.1791	7.3688	12.7093	1.71504	0.778243			HAC1	91.9636	49.9739	0.543906	-0.878572
ZWF1	20.8177	35.7424	1.7135	0.776943			RIM8	33.9948	18.5999	0.548468	-0.866521
RPL7	8.3157	14.3145	1.71281	0.776366			PGA38	19.0155	10.3906	0.548801	-0.865646
ASN1	33.284	57.0748	1.71264	0.776223			orf19.4824	24.7395	13.5405	0.549146	-0.86474
RPF2	7.6642	13.1884	1.7115	0.775258			AXL2	18.7106	10.2406	0.549722	-0.863226
TSR2	15.4422	26.4403	1.70763	0.771994			PGA62	1093.52	607.285	0.555391	-0.848424
ADE2	14.7619	25.2315	1.70446	0.769314			orf19.5469	136.323	75.7568	0.55604	-0.846741
orf19.962	13.3074	22.7184	1.70193	0.767168			TPI1	122.643	68.3095	0.557339	-0.843373
IMG2	7.2907	12.4713	1.70096	0.766351			SEC18	20.4232	11.3467	0.557744	-0.842324
NMD3	12.2107	20.8291	1.70007	0.765597			orf19.1486	83.2508	46.569	0.559911	-0.836731
FCA1	7.7422	13.2241	1.69903	0.764708			EFG1	104.975	58.7326	0.559913	-0.836726
orf19.1304	7.8418	13.3828	1.6977	0.763582			YVC1	16.3724	9.1289	0.560264	-0.83582
orf19.3517	62.3979	105.548	1.69043	0.757387			orf19.4046	24.5826	13.7325	0.560415	-0.835432
orf19.6909	8.235	13.9875	1.69016	0.757162			GAC1	14.5039	8.0881	0.560679	-0.834753
orf19.5049	7.94	13.467	1.68744	0.754834			orf19.6527	20.3082	11.4115	0.564062	-0.826073
RRS1	9.3953	15.8531	1.6801	0.748551			HXK2	99.2147	56.1051	0.565929	-0.821306
orf19.1998	11.7488	19.805	1.67992	0.74839			orf19.6737	19.2577	10.9357	0.570094	-0.810729
orf19.6198.1	8.8914	14.9616	1.67511	0.744257			AAF1	22.7941	12.952	0.570103	-0.810705
WBP1	64.4753	107.923	1.67282	0.742286			orf19.31	11.7786	6.6866	0.57133	-0.807604
orf19.1624.1	8.2892	13.9299	1.67238	0.7419			GPH1	25.7682	14.8222	0.576855	-0.793719
orf19.4812	16.842	28.2151	1.6713	0.740967			CPH2	26.604	15.3454	0.578393	-0.789879
UTP21	10.3817	17.4054	1.67009	0.739927			SCS7	28.2629	16.3777	0.58096	-0.78349
SKN1	11.6274	19.4572	1.66765	0.737817			FCR1	14.6522	8.4719	0.581059	-0.783243
SOD1	18.9101	31.5949	1.66727	0.737485			orf19.3073	98.777	57.3891	0.58142	-0.782347
orf19.3704	7.73	12.9443	1.66594	0.736335			EXO1	14.3701	8.3191	0.581827	-0.781337
CGR1	6.1321	10.2722	1.66432	0.734932			orf19.4043	57.8284	33.6764	0.583072	-0.778255
KTI12	10.0357	16.7046	1.65796	0.72941			orf19.787.1	64.2586	37.4306	0.583148	-0.778066
RLP24	11.5936	19.2735	1.65676	0.728365			orf19.3644	27.053	15.771	0.584503	-0.774719
orf19.2821	22.8083	37.8226	1.65541	0.727187			NRG1	111.233	65.0326	0.585027	-0.773426
NEP1	11.8641	19.6994	1.6549	0.726745			CHT3	10.5009	6.1116	0.58595	-0.77115
HCA4	6.9512	11.5538	1.65274	0.72486			orf19.6114	96.5181	56.7957	0.588872	-0.763974
orf19.7370	9.4788	15.7242	1.652	0.724216			orf19.210	29.9602	17.6246	0.589637	-0.762102
orf19.3175	19.7005	32.5354	1.64821	0.720901			YHB1	10.1707	5.9569	0.589726	-0.761883
ARO3	24.7845	40.9058	1.64785	0.720581			PMT4	35.2266	20.7372	0.589844	-0.761593
orf19.1833	15.2213	25.0232	1.63976	0.713482			MSH6	12.2645	7.2203	0.592042	-0.756229
orf19.967	9.5694	15.7004	1.63406	0.708463			PST3	100.465	59.4576	0.59223	-0.755769
orf19.3114	7.6807	12.594	1.63147	0.706175			orf19.1146	30.8512	18.2892	0.594135	-0.751137
SIK1	19.6559	32.0994	1.62986	0.70475			orf19.1144	24.0234	14.2595	0.595252	-0.748428
CSI2	6.4048	10.4952	1.62883	0.703834			orf19.1913	88.3727	52.6216	0.595908	-0.746838
orf19.2637	17.7873	29.0351	1.62881	0.703823			PHO112	13.8049	8.1876	0.59602	-0.746567
orf19.3469	8.8147	14.4202	1.62879	0.703803			orf19.1889	22.0616	13.1149	0.596297	-0.745897
TAR1	137.122	223	1.62583	0.701181			HSP70	24.9976	14.8895	0.597248	-0.743597
orf19.6886	7.9753	13.0246	1.62528	0.700686			orf19.3364	18.1393	10.8206	0.59874	-0.739998
NOP10	24.0051	39.0475	1.62403	0.699582			orf19.7078	28.4188	17.0016	0.599661	-0.737782
orf19.7488	7.5999	12.4011	1.62354	0.699143			orf19.952	12.0064	7.1695	0.600468	-0.735842
TSR1	15.8176	25.7249	1.62241	0.69814			SUN41	78.7554	47.3003	0.601104	-0.734313
orf19.3481	42.7948	69.4251	1.62083	0.696731			SEC61	85.936	51.8698	0.604047	-0.727267
orf19.6795	6.954	11.3319	1.62063	0.696552			orf19.7341.1	36.6738	22.1534	0.605143	-0.724652
IFR2	12.1672	19.7733	1.62004	0.696025			PLB3	22.0543	13.4107	0.609845	-0.713484
orf19.3547	8.8556	14.4058	1.61975	0.695768			ALS3	17.3431	10.5483	0.610459	-0.712033
PWP2	7.6075	12.381	1.61933	0.695399			CLB4	19.3013	11.7745	0.612047	-0.708287
orf19.475	6.2221	10.137	1.61924	0.695317			SEC24	42.2857	25.8476	0.612178	-0.707977
ADE17	33.2422	53.542	1.60883	0.686014			orf19.4476	20.2556	12.3708	0.612647	-0.706872
REI1	8.731	14.0973	1.60767	0.684968			orf19.4390	18.8891	11.5366	0.612804	-0.706502
NSA1	10.062	16.2273	1.6067	0.684102			orf19.3826	42.1304	25.7966	0.613222	-0.705519
orf19.7160	12.5726	20.2301	1.60426	0.681905			orf19.1258	21.5146	13.1606	0.613502	-0.70486
orf19.2314	13.4358	21.5822	1.60184	0.679731			TOS1	88.3648	54.3869	0.615916	-0.699194
JIP5	8.6064	13.8107	1.59776	0.676047			GRP2	60.9111	37.5026	0.616324	-0.698239
orf19.6585	11.2604	18.0385	1.59664	0.675042			HCM1	17.8708	10.9774	0.616411	-0.698035
orf19.1109	23.9225	38.2009	1.59438	0.672992			CSP37	22.7522	14.087	0.620816	-0.687764
MAK16	15.5281	24.8137	1.59416	0.672797			FGR41	13.0832	8.1011	0.622087	-0.684811
DAD3	18.1907	29.0524	1.59384	0.672504			HHF1	302.76	188.577	0.622985	-0.68273
NOP4	9.4436	15.1023	1.59293	0.671684			WSC1	40.9324	25.4896	0.623644	-0.681206
SMD2	12.5084	19.9813	1.59269	0.671467			HHF22	264.707	165.28	0.624531	-0.679155
orf19.6286	19.0479	30.3951	1.59261	0.671391			orf19.4711	12.7404	7.9248	0.624965	-0.678153
orf19.7664	19.8708	31.6417	1.58941	0.668487			PMT2	38.2267	23.8533	0.624977	-0.678125
orf19.1273	7.5237	12.0156	1.5892	0.668303			orf19.3475	73.204	45.8387	0.626687	-0.674182
NCS2	9.4303	15.0313	1.5877	0.666942			STF2	46.7693	29.3258	0.627827	-0.671562
ZUO1	17.5127	27.8371	1.58619	0.665566			orf19.675.1	15.2945	9.5744	0.628432	-0.670171
FMA1	18.1066	28.7779	1.58612	0.665504			orf19.7499	26.2425	16.5081	0.630468	-0.665505
EFB1	106.895	169.472	1.58485	0.66435			DES1	78.6184	49.5398	0.6306	-0.665204
NOC2	9.3443	14.8173	1.5795	0.659471			GSC1	67.522	42.5879	0.631272	-0.663665
MCM3	9.5071	15.0727	1.57932	0.659305			orf19.1189	15.2469	9.6091	0.632642	-0.660538
orf19.6477	8.2302	13.0425	1.57769	0.657817			SUR2	33.3455	21.0727	0.633051	-0.659607
BAT22	17.3314	27.3735	1.57609	0.656352			SEC23	33.9265	21.4482	0.633277	-0.659091
DIP2	9.1973	14.5533	1.57608	0.656342			CDC11	32.406	20.4912	0.633458	-0.658678
orf19.276	14.2147	22.4453	1.57498	0.655329			NDT80	45.6338	28.8718	0.633488	-0.658611
orf19.6259	10.6098	16.7634	1.57458	0.654964			CTM1	23.667	14.9936	0.635065	-0.655023
orf19.2782	11.6402	18.3771	1.57383	0.654281			orf19.6920	54.5176	34.6937	0.637042	-0.65054
HPT1	22.7366	35.8314	1.57341	0.653897			SMF12	34.9248	22.2153	0.637129	-0.650344
orf19.6418	9.1621	14.4432	1.57018	0.650934			DFI1	72.0278	45.9728	0.638766	-0.64664
IMH3	42.4836	66.7619	1.57013	0.650886			ARE2	15.0508	9.5832	0.639121	-0.645838
CDC54	7.8971	12.4514	1.56949	0.650299			orf19.3360	11.4669	7.3032	0.640033	-0.643781
orf19.275	10.511	16.5469	1.56883	0.649693			WSC4	28.2252	18.0325	0.640154	-0.643508
URA2	17.3506	27.2546	1.56754	0.648507			TIM12	63.0365	40.5431	0.643734	-0.635464
orf19.2650.1	21.9034	34.2975	1.56328	0.644577			MAF1	13.2663	8.5045	0.643746	-0.635437
TIM21	8.608	13.5085	1.56276	0.644095			orf19.4828	10.2095	6.5521	0.64524	-0.632093
NOC4	6.9928	10.9776	1.56181	0.643218			orf19.6813	22.4043	14.4309	0.645694	-0.631077
orf19.446.2	15.4681	24.2045	1.56117	0.642631			HSL1	19.7223	12.731	0.647301	-0.627491
orf19.2527	8.7745	13.7513	1.5608	0.642284			DPP2	11.2206	7.2383	0.648225	-0.625433
SSF1	7.2659	11.3775	1.55819	0.639875			ADH5	18.2352	11.7872	0.648327	-0.625207
orf19.1026	7.0074	10.974	1.55809	0.639783			orf19.2726	44.4346	28.8744	0.650604	-0.620148
orf19.1687	8.0463	12.5893	1.55768	0.639396			DPM1	31.6248	20.5842	0.651988	-0.617082
orf19.1815	23.6932	36.9538	1.55733	0.639072			PGA54	131.457	85.7201	0.652343	-0.616297
orf19.168	9.2939	14.5283	1.55721	0.638966			orf19.376	12.811	8.3229	0.652382	-0.616212
CHR1	7.5622	11.8234	1.55613	0.637965			CHT1	19.8208	12.8982	0.652494	-0.615964
orf19.501	10.2914	16.0439	1.55358	0.635599			orf19.374	41.3905	26.9761	0.652586	-0.615761
orf19.1140	8.0324	12.533	1.55342	0.635444			SRB1	107.554	70.195	0.652972	-0.614908
orf19.5502	6.9795	10.8861	1.55182	0.63396			STP4	62.867	41.0415	0.653382	-0.614002
orf19.2789	9.3625	14.5838	1.55179	0.633932			KIS1	26.852	17.5221	0.653833	-0.613006
orf19.1388	20.1342	31.2424	1.54898	0.63132			PHO89	10.9723	7.1441	0.654254	-0.612077
orf19.225	12.302	19.1061	1.54863	0.630992			BUD14	17.9268	11.721	0.655746	-0.608791
MNN4	7.4262	11.5519	1.54818	0.630572			RIM15	12.0521	7.8696	0.655821	-0.608626
RLM1	26.4938	41.0181	1.54615	0.628684			orf19.6115	86.5795	56.7691	0.656085	-0.608046
orf19.4740	20.2747	31.3898	1.54553	0.628106			orf19.4771	29.268	19.1696	0.656143	-0.607918
orf19.2544	12.1956	18.8988	1.54517	0.627766			orf19.5813	73.1361	47.9558	0.656176	-0.607844
ARC40	38.4571	59.3535	1.54196	0.624765			KRE9	79.5482	52.1661	0.656212	-0.607766
orf19.2237.1	10.085	15.6047	1.54194	0.62475			PMI1	34.73	22.7759	0.656787	-0.606502
orf19.5660.1	28.9263	44.5836	1.53942	0.622385			HEM13	33.7136	22.1326	0.657505	-0.604927
RPA34	8.6195	13.3007	1.53687	0.619991			PMT1	37.8715	24.878	0.657809	-0.604259
orf19.3990	8.7073	13.4305	1.53628	0.619443			orf19.1267	24.1973	15.8917	0.658168	-0.603473
orf19.6222.1	7.5313	11.612	1.53473	0.617987			MIG1	40.5762	26.6818	0.658415	-0.602932
orf19.4528	8.6225	13.2842	1.53445	0.617717			orf19.5517	22.1849	14.5841	0.658926	-0.601812
orf19.4895	6.6732	10.2831	1.53297	0.616328			orf19.2203.1	10.7376	7.0452	0.659297	-0.600999
AIP2	19.2626	29.5234	1.52993	0.613465			orf19.5814	39.0405	25.7268	0.659848	-0.599793
orf19.2386	10.7703	16.5273	1.52961	0.613162			orf19.676	29.4392	19.3957	0.659994	-0.599475
HBR1	17.0933	26.1924	1.52922	0.612799			orf19.6113	17.866	11.7596	0.660114	-0.599214
NOG1	9.9399	15.2514	1.52904	0.612625			KAR2	135.439	89.5408	0.661365	-0.596482
orf19.5363	12.699	19.4483	1.52733	0.611012			GPM2	32.4431	21.4827	0.663204	-0.592476
GAR1	22.8158	34.8891	1.52685	0.610563			orf19.3302	16.0629	10.6193	0.663204	-0.592475
orf19.4193	15.689	24.0033	1.52659	0.610311			LTE1	10.0472	6.6336	0.663592	-0.591632
orf19.828	54.4408	83.0848	1.52518	0.608984			orf19.446	31.8711	21.2152	0.666702	-0.584886
orf19.7011	7.8275	11.9735	1.52299	0.606906			orf19.5495	23.94	15.9285	0.666743	-0.584797
RAD16	8.8834	13.5647	1.52111	0.60512			CAR1	50.3895	33.6111	0.667685	-0.58276
CKB2	11.2595	17.1743	1.52069	0.604728			orf19.3714	12.5213	8.3386	0.6686	-0.580785
MGE1	35.1738	53.4382	1.51779	0.601972			orf19.3737	22.14	14.7704	0.668633	-0.580713
orf19.2362	7.4146	11.3047	1.51767	0.60186			GSY1	18.9204	12.6227	0.668898	-0.580143
orf19.6366	24.2636	36.8606	1.51704	0.601261			orf19.211	38.6089	25.8021	0.669151	-0.579596
SOF1	9.7737	14.8781	1.51697	0.601192			HSP12	15.0006	10.0136	0.669748	-0.578309
orf19.2439.1	27.1923	41.2927	1.51664	0.600882			PGI1	45.2535	30.2995	0.670279	-0.577166
MEC3	11.8792	18.0594	1.51591	0.600185			orf19.7111	31.3533	20.9978	0.670766	-0.576119
PRS1	18.7106	28.3976	1.51498	0.599295			orf19.3898	16.0047	10.7025	0.670767	-0.576117
UTP18	11.4246	17.3359	1.51293	0.597344			orf19.3459	13.367	8.9352	0.670914	-0.5758
orf19.5879	8.9868	13.6476	1.51292	0.597336			ASR3	10.4753	6.9972	0.671111	-0.575377
PRN4	7.5907	11.529	1.51209	0.59654			orf19.6192	87.2038	58.5531	0.671828	-0.573837
orf19.2406	62.5471	94.5226	1.51041	0.594937			FLC1	34.9975	23.4795	0.671828	-0.573835
orf19.7545	20.663	31.2516	1.50997	0.594524			orf19.2163	21.8571	14.6527	0.671887	-0.573709
ERB1	8.0239	12.1647	1.50971	0.594268			PRC2	12.209	8.1737	0.672167	-0.573109
orf19.5201.1	29.0762	43.9145	1.50858	0.593187			HHT21	227.204	153.192	0.674393	-0.568339
orf19.494	7.6189	11.5424	1.5083	0.592921			ZDS1	21.9255	14.764	0.674854	-0.567352
RBT4	15.6475	23.6444	1.50782	0.592464			orf19.3083	24.9395	16.8085	0.675273	-0.566457
MAK21	9.0855	13.7483	1.50763	0.592279			orf19.4715	14.1384	9.5175	0.675462	-0.566053
CDC46	9.6116	14.5333	1.50679	0.591474			orf19.242.2	17.2666	11.6367	0.67582	-0.565289
orf19.5837	6.7216	10.1766	1.50648	0.591181
orf19.4507	7.3095	11.0567	1.50573	0.590462
orf19.341	11.9699	18.0634	1.50485	0.589621
orf19.1548	8.6304	13.0238	1.50323	0.588066
RCE1	12.8641	19.386	1.50307	0.587916
orf19.4168	9.406	14.1705	1.50121	0.586126
orf19.688	33.4368	50.2263	1.50063	0.585567
orf19.3223.1	17.0984	25.7027	1.5003	0.585248
MED1	39.5658	59.2211	1.49552	0.58065
orf19.6675	10.4405	15.6619	1.49537	0.580498
orf19.7223	8.6693	12.9798	1.49154	0.576807
orf19.1483	8.3549	12.5058	1.49095	0.576228
orf19.1367.1	20.4404	30.5207	1.49075	0.576043
orf19.3463	13.5729	20.2759	1.49024	0.575545
LYS1	15.4835	23.1127	1.48957	0.574895
orf19.4217	9.6954	14.4839	1.48885	0.5742
orf19.5235	7.6212	11.393	1.4885	0.573858
orf19.5225	28.3864	42.2682	1.48731	0.572709
orf19.6007	8.7374	13.0417	1.48706	0.572458
orf19.813	13.8892	20.6997	1.48684	0.572249
orf19.3061.1	77.1619	114.739	1.48636	0.571784
orf19.2965.1	16.3452	24.2899	1.4831	0.568617
orf19.1993	10.0022	14.8775	1.4826	0.568127
TRM1	8.8124	13.113	1.48254	0.568072
orf19.4365	7.3604	10.9538	1.48166	0.567218
SER1	12.2881	18.2397	1.48043	0.566015
NOP5	25.2503	37.4273	1.48035	0.565938
orf19.1600	9.8656	14.6493	1.48002	0.565618
RPO26	19.7918	29.3031	1.47815	0.563794
orf19.2954	22.1873	32.7791	1.47524	0.560949
HAS1	9.4296	13.9318	1.47244	0.558213
orf19.444	11.9601	17.6495	1.47175	0.557537
orf19.4450.1	12.5074	18.4497	1.47133	0.557125
orf19.1578	8.9296	13.1825	1.471	0.556793
HAP41	22.8416	33.6445	1.47089	0.556686
orf19.5720	9.249	13.6488	1.47062	0.556422
orf19.716	15.8422	23.3105	1.46846	0.554305
POP3	12.346	18.1685	1.46782	0.553676
orf19.5067	8.0048	11.7961	1.46778	0.55364
orf19.6072.1	25.7983	37.9063	1.46752	0.553381
orf19.3108	7.0613	10.4052	1.46694	0.55281
IMP2	9.2893	13.6725	1.46683	0.552701
DAO2	9.0511	13.3101	1.46541	0.551303
orf19.3503	86.9337	127.119	1.46172	0.547666
orf19.2610	14.5827	21.3581	1.46145	0.547405
orf19.6220	13.7522	20.1396	1.46111	0.547066
orf19.529.1	7.1246	10.4541	1.46086	0.546814
NAN1	13.0536	19.113	1.46066	0.546625
orf19.7589	26.2642	38.3988	1.46027	0.546233
orf19.647.3	6.8865	10.0936	1.45904	0.545022
orf19.3836	18.1519	26.5198	1.45847	0.544453
orf19.4758	23.1869	33.8532	1.45804	0.544029
RPA12	21.1732	30.9075	1.45759	0.54358
orf19.3957	11.2039	16.3756	1.45751	0.54351
orf19.7617	34.0075	49.6013	1.4572	0.543195
RRP42	8.6228	12.6058	1.45662	0.542624
PGM2	13.1658	19.2083	1.45549	0.541509
ELF1	11.1843	16.321	1.45521	0.541225
orf19.5207	11.893	17.3477	1.45482	0.540844
orf19.7300	12.5809	18.347	1.45471	0.540729
BMS1	6.9364	10.1288	1.4537	0.539728
orf19.5589	8.7165	12.6918	1.45089	0.536941
orf19.2813	10.5001	15.2736	1.45033	0.536377
orf19.6474	11.4086	16.5872	1.5	0.584963
PAM16	40.425	58.6469	1.5	0.584963
orf19.2018	12.0098	17.4494	1.5	0.584963
HIS3	13.5479	19.6715	1.5	0.584963
orf19.6342	15.1517	21.97	1.5	0.584963
RAD32	33.4047	48.3466	1.5	0.584963
PGA15	7.1277	10.3378	1.5	0.584963
orf19.6225.1	46.6051	67.325	1.5	0.584963
orf19.512	10.553	15.2776	1.5	0.584963
orf19.6730	11.9389	17.2709	1.5	0.584963
orf19.2230	9.2403	13.3763	1.5	0.584963
NOP1	43.1091	62.1378	1.5	0.584963
orf19.3666	7.351	10.6314	1.5	0.584963
orf19.1938	7.0394	10.182	1.5	0.584963
PUT1	14.6875	21.18	1.5	0.584963

## Sheet: 2. Target overlaps
Common and unique differentially bound genes in the cas5∆/cas5∆ mutant in comparison to the wild type strain in the presence and absence of caspofungin treatment.
Genes with increased RNA PolII occupancy under both basal and caspofungin treated conditions			Genes with decreased RNA PolII occupancy under both basal and caspofungin treated conditions			Genes with increased RNA PolII occupancy under basal but downregulated with caspofungin treatment			Genes with decreased RNA PolII occupancy under basal but with increased RNA PolII occupancy with caspofungin treatment			Genes with increased RNA PolII occupancy only under basal conditions			Genes with decreased RNA PolII occupancy only under basal conditions			Genes with increased RNA PolII occupancy only with caspofungin treatment			Genes with decreased RNA PolII occupancy only with caspofungin treatment
total	genes		total	genes		total	genes		total	genes		total	genes		total	genes		total	genes		total	genes
157	KAR4		113	ADH1		3	orf19.5114.1		3	orf19.4211		169	SSA2		159	orf19.4380.1		181	NAN1		147	orf19.951
	NOP4			TDH3			orf19.1765			ALD5			CHT2			EBP1			PGA32			RTA4
	TRM2			PHO112			ALS1			orf19.6311			orf19.1404			orf19.398			orf19.4391			orf19.6527
	ARC40			GIT1									orf19.4376			ADAEC			orf19.2230			CZF1
	SNZ1			YVC1									orf19.1250			HGT8			PGM2			FGR6-1
	orf19.6418			orf19.6840									orf19.5262			RBT5			orf19.2638.1			CDC11
	ADE4			ADH2									TIM9			ENG1			orf19.6795			orf19.210
	orf19.4921.1			orf19.3644									SDH2			orf19.35			KTI11			PHO89
	orf19.2782			orf19.1258									orf19.2065			KEX2			JIP5			PMT4
	IMH3			RIM15									BUD21			orf19.1246			orf19.3503			orf19.1889
	ZWF1			PGA38									HAM1			orf19.1150.1			orf19.1026			BMT6
	orf19.3836			MAF1									orf19.6156			OSM2			orf19.3113			orf19.676
	NEP1			orf19.4390									PGA57			HAP43			orf19.1548			orf19.3360
	NIP7			orf19.6079									PTC8			ACS1			orf19.3704			FGR6-10
	orf19.4507			orf19.4824									orf19.4513			FRP3			orf19.512			PRC2
	orf19.3463			SEC61									orf19.2256			orf19.4423			orf19.7488			HOS3
	orf19.4740			orf19.675									orf19.7663			orf19.787			PUT1			WSC2
	orf19.3108			CHT3									MXR1			FOX2			RRP8			HEM13
	orf19.446.2			HGT7									orf19.5076.1			WH11			orf19.341			UTR2
	HIS3			STF2									LSM6			CAT2			orf19.1833			CLB4
	GCV2			HSP12									PRO2			orf19.5825.1			orf19.2789			GAC1
	orf19.2406			POL93									HMX1			orf19.1240			orf19.1483			orf19.6115
	CAM1			RTA3									COX6			orf19.5755			FAV2			EFG1
	HPT1			DDR48									orf19.2784			PIR1			UTP18			orf19.4476
	orf19.3175			PHO84									NDH51			MET1			orf19.6474			orf19.952
	orf19.7370			QDR1									orf19.5064.1			orf19.2761			orf19.4324			YHB1
	GUA1			HHF22									STE50			orf19.1368			RHD3			DPM1
	orf19.828			FGR41									URA5			orf19.7519			orf19.5502			GSC1
	orf19.5589			TPI1									orf19.4066			AMN1			NCS2			orf19.3737
	orf19.4167			RIM8									orf19.4133			RNH35			orf19.2237.1			FGR6-3
	YMC1			SOD3									VPS33			orf19.6951			CDC46			CRH11
	MEC3			orf19.2163									TPO3			orf19.6177			orf19.3957			CRZ2
	BAT22			orf19.6113									FUM12			PLB4.5			CIC1			PGA23
	orf19.1180			PHO113									LYS12			AYR2			FAD2			orf19.675.1
	orf19.3223.1			orf19.4531									orf19.1625			ERG3			IMG2			MSH6
	orf19.3481			TRY6									orf19.4946			ZCF2			orf19.7664			orf19.3083
	MGE1			PCL1									orf19.4061			orf19.4216			SOD1			orf19.1913
	orf19.2829			GPH1									ARO2			PDR16			DIM1			MIG1
	orf19.2439.1			orf19.787.1									orf19.6833.2			PEX3			orf19.5019			orf19.4771
	orf19.6731			HHF1									orf19.499			KIP2			orf19.2965.1			ADH5
	GCV3			ALS3									orf19.7194			orf19.6667			SOD5			FGR6-4
	orf19.3810			RBE1									orf19.69.2			orf19.7214			TSR2			RTA2
	orf19.501			PGA6									COX5			ASH1			orf19.6247.1			SEC18
	orf19.6585			PCL2									orf19.7673			RAD57			orf19.8278			KRE1
	orf19.1388			BMT4									orf19.1642			CDR1			orf19.275			LTE1
	SEN2			orf19.5267									orf19.2067			CTA2			orf19.7223			SEC24
	AIP2			SCW11									orf19.7590			ECM4			orf19.6259			orf19.7111
	SHM2			ENO1									ILV3			PRX1			NOP15			orf19.1146
	MEP1			CAR1									RPL28			TRX2			orf19.1304			orf19.5814
	RHD2			GPM1									orf19.1953			SUL2			PGA15			orf19.3714
	orf19.1124			RNR22									orf19.7296			LAT1			orf19.7552			orf19.4715
	ADE13			orf19.1189									orf19.5288.1			MSN4			PRN4			AAF1
	HCA4			orf19.6737									HIS7			orf19.6008			orf19.1687			orf19.5775
	MED1			orf19.5518									orf19.6838			HGT6			orf19.2610			PMT2
	orf19.6675			CCN1									PGA44			LIP8			orf19.3666			orf19.5022
	RAD16			orf19.3048									orf19.4017			orf19.7166			DIP2			orf19.5290
	DEM1			orf19.6852.1									HNM4			orf19.6713			orf19.6909			KRE9
	HAP41			CTR1									orf19.1268			VTC3			LYS1			orf19.2529.1
	orf19.6035			orf19.3216									orf19.1873			orf19.904			CCC1			orf19.374
	PRS1			HSP70									orf19.5504			orf19.4189			orf19.529.1			DFI1
	ADE1			CAR2									FAD3			CDR4			orf19.1273			PHR2
	orf19.2821			CSP37									orf19.913.2			orf19.3483			PWP2			SMF12
	SER2			GPM2									orf19.5340			ATO2			NOC4			orf19.2203.1
	orf19.1109			PDC11									orf19.6903			AHP1			PGA31			orf19.7499
	orf19.1998			orf19.3302									RPP2A			FTR1			SSF1			KAR2
	orf19.276			DAK2									orf19.1610			MSH2			orf19.1707			BUD14
	HBR1			orf19.5474									ATF1			orf19.2132			orf19.6222.1			orf19.2726
	GDH3			FCR1									orf19.4375			orf19.4532			NCE103			HSL1
	orf19.7545			ASR3									orf19.3577.1			FGR29			NOP14			NDT80
	MAK16			orf19.6114									RIP1			URA4			orf19.962			SHA3
	orf19.6316.4			orf19.733									orf19.1394			SOU1			KRR1			PMI1
	orf19.6886			GIT3									orf19.3501			orf19.3226			orf19.5067			WSC1
	KTI12			MUM2									orf19.2478			orf19.321			RCE1			orf19.711
	orf19.6366			orf19.3073									orf19.698			SYG1			orf19.1938			orf19.5814.1
	orf19.1549			GIN4									ILV2			orf19.409			MAK21			HXK2
	orf19.4814			PFK2									orf19.732			orf19.7404			MCM2			orf19.7341.1
	orf19.1305			PST3									orf19.2310			orf19.1391			SKO1			KIS1
	orf19.4949			orf19.7077									orf19.5194.1			TPK2			orf19.6342			ZDS1
	ASN1			PGI1									UTP5			SLK19			orf19.4528			DAG7
	orf19.4812			orf19.2175									orf19.7192			SIM1			ECM1			GRP2
	RLM1			orf19.2204									orf19.4225.1			orf19.5842			orf19.909.1			orf19.5614
	SER1			CAS5									ECM15			GDE1			orf19.6007			orf19.727
	orf19.2362			orf19.3461									OGG1			orf19.2426			NSA2			MNN15
	YTM1			GLK1									SDH12			orf19.6118			RPA12			SCS7
	EFB1			VTC4									MGM101			ISN1			orf19.5049			AXL2
	PHR1			orf19.5475									orf19.6355			orf19.6654			SMD2			HCM1
	NOC2			orf19.3694									HBR3			orf19.2959.1			orf19.3585			orf19.7085
	SNO1			NRG1									orf19.446.1			CMK1			orf19.4217			orf19.242.2
	CHA1			WSC4									GCV1			XOG1			RPO26			DES1
	REI1			orf19.1277									ACO2			orf19.5129			orf19.813			CPH2
	FGR46			orf19.4942									orf19.134			orf19.1562			orf19.5363			orf19.2125
	orf19.2314			orf19.3364									PGA45			orf19.95			MCM3			orf19.3459
	DAD3			orf19.2684									orf19.7244			orf19.1655.3			RLP24			CHT1
	WBP1			CSH1									CYT1			PHO100			orf19.6286			orf19.6813
	NOP5			orf19.6117									orf19.6660			TLO9			orf19.6477			orf19.5813
	RPA34			PFK1									orf19.3742			STB3			orf19.4168			DPP2
	RAD32			TOS1									orf19.1950			orf19.5455			orf19.688			orf19.4828
	SAM4			orf19.3522									CPR6			DBF2			RPL7			orf19.31
	orf19.6220			RCT1									orf19.5553			ALS9			orf19.4193			CTM1
	orf19.5225			RHR2									NAR1			FMP27			orf19.475			orf19.6192
	orf19.3061.1			orf19.1486									orf19.6805			ROB1			orf19.1609			EXO1
	TSR1			HHT21									HSP90			BCY1			TIM21			orf19.1144
	MIS11			FBA1									NHP2			orf19.3325			NSA1			ECM331
	NOG2			orf19.33									orf19.1682			orf19.3508			orf19.3220			PGA52
	orf19.1676			TYE7									orf19.7485			SOD4			orf19.1993			orf19.6920
	orf19.1800			PGA62									YNK1			orf19.3319			orf19.2061			orf19.4043
	URA2			GSY1									orf19.5564			PRP13			TAR1			orf19.446
	orf19.5905			SWE1									orf19.6350			DSE1			NOP10			RFC52
	QCR9			orf19.3998									orf19.3196			orf19.557			orf19.4895			YOX1
	orf19.7589			PGK1									REX2			orf19.1169			orf19.3831			HAC1
	orf19.1030			orf19.5472									RAD6			orf19.4907			orf19.7011			orf19.376
	orf19.5885			CDC19									AKR1			PLB1			PGA53			PNG2
	orf19.1272			orf19.5469									LAB5			TPS2			ARX1			orf19.5517
	orf19.7397.1												MIS12			orf19.1152			ENP2			SRB1
	ADE5,7												ARC18			orf19.2296			orf19.5201.1			BRG1
	ADE8												orf19.4883			PIL1			SOF1			orf19.3475
	orf19.5364												orf19.3578			orf19.7199			orf19.3954.1			ERO1
	ADE17												IDH1			OPT7			orf19.1140			SEC23
	AAT1												MCI4			HHT2			ZUO1			orf19.4706
	TRM12												TRP3			ACE2			orf19.3978			orf19.6896
	orf19.1367.1												orf19.7279.1			orf19.6077			ERB1			SUN41
	NMD3												SER33			CUE5			SAM37			orf19.4711
	orf19.4365												PTP3			TFS1			orf19.2813			TIM12
	orf19.2386												ACO1			GLK4			orf19.1624.1			PGA13
	orf19.3990												SEO1			ROD1			orf19.4758			SUR2
	LEU4												orf19.4922			orf19.1564			orf19.2527			orf19.4046
	TRM1												CIT1			YDC1			ELF1			orf19.5495
	HAS1												GAP6			orf19.2269			orf19.7617			FLC1
	CRD2												orf19.827			TPS3			NOP1			orf19.7504
	DIP5												YKE2			CAT1			orf19.7160			orf19.2925
	orf19.4450.1												orf19.4960			ASM3			RRS1			MCD1
	orf19.7398												orf19.2018.1			MET4			orf19.2544			orf19.211
	orf19.7624												RPF1			orf19.1360.1			orf19.1465			orf19.1267
	PAM16												GPX2			SIT1			orf19.5235			orf19.3826
	ARO3												orf19.287			orf19.3869			CAN2			PGA54
	FTR2												orf19.7215.3			ATC1			orf19.6198.1			orf19.1208
	orf19.5837												orf19.1968			IQG1			orf19.716			PMT1
	SIK1												ATS1			YWP1			orf19.647.3			orf19.1430
	orf19.1815												BUL1			orf19.338			DAO2			orf19.6816
	POP3												BAT21			orf19.1887			orf19.6730			orf19.7078
	MRT4												ARO4			orf19.988			BMS1			ARE2
	orf19.2637												MAM33			ASR2			CGR1			orf19.2308
	orf19.5879												orf19.7618			orf19.2372			orf19.1600			MNN1
	orf19.7300												orf19.4705			GAD1			orf19.1708			STP4
	orf19.6828												orf19.3124			PHO81			NOG1			orf19.6608
	FMA1												MMD1			ARA1			IMP2			orf19.3898
	CHR1												LYS22			ZRT2			RRP15			PLB3
	orf19.225												orf19.4789			SDS24			orf19.3114
	ADE2												orf19.5287			orf19.3932			orf19.5207
	RPF2												orf19.3559			orf19.7396			UTP21
	orf19.2934												ALI1			RBT7			IFR2
	orf19.3547												ATP18			GAL4			orf19.5720
	orf19.3517												orf19.5006.1			CWH8			orf19.6225.1
	ADE6												PRR2			GDB1			FCA1
	orf19.1791												orf19.7013			orf19.3264.1			CKB2
	HOL1												orf19.1872			FET34			orf19.6072.1
	PHO87												orf19.3087.2			orf19.1691			MNN4
													orf19.1082			POT1			orf19.1578
													orf19.2010			MET10			RBT4
													orf19.7603						orf19.168
													BMT7						orf19.967
													orf19.2091						orf19.5660.1
													orf19.2128						UTP15
													FESUR1						orf19.6864
													CUP9						orf19.2018
													ANT1						RRP42
													HOM2						orf19.494
													orf19.1985						ENP1
													orf19.4016						orf19.3469
																			CSI2
																			orf19.3572
																			GAR1
																			HIT1
																			SKN1
																			CDC54
																			orf19.2650.1
																			orf19.444
																			orf19.2954
																			SPB1
																			orf19.81
																			RPC19

## Sheet: 3. GO process - basal UP
GO processes of all genes with increased RNA PolII occupancy in cas5∆/cas5∆ mutant in comparison to the wild type strain under caspofungin treatment condition.
GOID	GO term	Cluster frequency	Background frequency	Corrected P-value	False discovery rate	Gene(s) annotated to the term	Directly Annotated GOID List
45333	cellular respiration	17 out of 169 genes, 10.1%	93 out of 13081 background genes, 0.7%	7.65e-09	0	COX5:IDH1:COX6:NDH51:CYT1:C3_04080W_A:RIP1:FUM12:SDH12:C5_02190C_A:C5_05230C_A:MAM33:MCI4:CIT1:SDH2:ACO2:ACO1	32981:70131:6122:9267:44011:9060:2:42149:12501:44262:6106:6099:30447:32543:22904:44416:22900:46356:36170:6102:6123:40009:6103:30437
9060	aerobic respiration	14 out of 169 genes, 8.3%	64 out of 13081 background genes, 0.5%	4.14e-08	0	COX5:IDH1:NDH51:C3_04080W_A:RIP1:FUM12:SDH12:C5_02190C_A:C5_05230C_A:MAM33:CIT1:SDH2:ACO2:ACO1	70131:6122:9267:44011:9060:2:42149:12501:44262:6106:6099:30447:32543:44416:22900:46356:36170:6102:6123:6103:40009:30437
55114	oxidation-reduction process	32 out of 169 genes, 18.9%	417 out of 13081 background genes, 3.2%	2.39e-07	0	HMX1:ANT1:COX5:IDH1:SER33:FAD3:C2_00400C_A:MXR1:HOM2:COX6:NDH51:CYT1:C2_09500W_A:ALI1:C3_04080W_A:RIP1:FESUR1:PRO2:FUM12:SDH12:C5_02190C_A:C5_05230C_A:GPX2:MAM33:MIS12:LYS12:MCI4:CIT1:SDH2:ACO2:ACO1:CR_10140W_A	32981:6122:9060:2:6636:12501:9396:1990355:6635:42167:44262:6561:9089:6099:30447:32543:44416:22900:6788:46356:9070:6102:9097:6123:6103:40009:70131:55114:9267:9086:44011:6531:42149:34465:9088:6979:15867:6106:9085:7031:22904:71585:70301:36170:6400:6879:16226:9090:30437
15980	energy derivation by oxidation of organic compounds	17 out of 169 genes, 10.1%	120 out of 13081 background genes, 0.9%	5.01e-07	0	COX5:IDH1:COX6:NDH51:CYT1:C3_04080W_A:RIP1:FUM12:SDH12:C5_02190C_A:C5_05230C_A:MAM33:MCI4:CIT1:SDH2:ACO2:ACO1	32981:6122:9060:2:12501:44262:6099:30447:32543:44416:22900:46356:6102:6123:6103:40009:70131:9267:44011:42149:6106:22904:36170:30437
6099	tricarboxylic acid cycle	8 out of 169 genes, 4.7%	20 out of 13081 background genes, 0.2%	2.72e-06	0	IDH1:FUM12:SDH12:C5_02190C_A:CIT1:SDH2:ACO2:ACO1	2:44262:6099:32543:44416:22900:46356:6102:6103:6106
6101	citrate metabolic process	8 out of 169 genes, 4.7%	20 out of 13081 background genes, 0.2%	2.72e-06	0	IDH1:FUM12:SDH12:C5_02190C_A:CIT1:SDH2:ACO2:ACO1	2:44262:6099:32543:44416:22900:46356:6102:6103:6106
6091	generation of precursor metabolites and energy	17 out of 169 genes, 10.1%	138 out of 13081 background genes, 1.1%	4.48e-06	0	COX5:IDH1:COX6:NDH51:CYT1:C3_04080W_A:RIP1:FUM12:SDH12:C5_02190C_A:C5_05230C_A:MAM33:MCI4:CIT1:SDH2:ACO2:ACO1	32981:6122:9060:2:12501:44262:6099:30447:32543:44416:22900:46356:6102:6123:6103:40009:70131:9267:44011:42149:6106:22904:36170:30437
72350	tricarboxylic acid metabolic process	8 out of 169 genes, 4.7%	22 out of 13081 background genes, 0.2%	6.65e-06	0	IDH1:FUM12:SDH12:C5_02190C_A:CIT1:SDH2:ACO2:ACO1	2:44262:6099:32543:44416:22900:46356:6102:6103:6106
43436	oxoacid metabolic process	29 out of 169 genes, 17.2%	454 out of 13081 background genes, 3.5%	0.0001	0	ARO4:ANT1:MMD1:IDH1:SER33:TRP3:FAD3:C1_13330C_A:MXR1:HOM2:BAT21:LYS22:ILV2:C3_06950W_A:PRO2:FUM12:LAB5:SDH12:C5_02190C_A:ILV3:GCV1:HIS7:MIS12:LYS12:CIT1:SDH2:ACO2:ARO2:ACO1	2:6597:6636:9396:1990355:6635:44262:162:9249:6561:9073:9089:6099:6544:32543:44416:22900:46356:19878:9070:6102:9097:6103:30643:55114:9099:9086:6531:9107:9088:9083:15867:105:6546:6799:6106:9098:9085:7031:71585:6730:70301:9082:9090:15940
6082	organic acid metabolic process	29 out of 169 genes, 17.2%	455 out of 13081 background genes, 3.5%	0.00011	0	ARO4:ANT1:MMD1:IDH1:SER33:TRP3:FAD3:C1_13330C_A:MXR1:HOM2:BAT21:LYS22:ILV2:C3_06950W_A:PRO2:FUM12:LAB5:SDH12:C5_02190C_A:ILV3:GCV1:HIS7:MIS12:LYS12:CIT1:SDH2:ACO2:ARO2:ACO1	2:6597:6636:9396:1990355:6635:44262:162:9249:6561:9073:9089:6099:6544:32543:44416:22900:46356:19878:9070:6102:9097:6103:30643:55114:9099:9086:6531:9107:9088:9083:15867:105:6546:6799:6106:9098:9085:7031:71585:6730:70301:9082:9090:15940
19752	carboxylic acid metabolic process	28 out of 169 genes, 16.6%	443 out of 13081 background genes, 3.4%	0.00022	0	ARO4:ANT1:MMD1:IDH1:SER33:TRP3:FAD3:C1_13330C_A:MXR1:HOM2:BAT21:LYS22:ILV2:PRO2:FUM12:LAB5:SDH12:C5_02190C_A:ILV3:GCV1:HIS7:MIS12:LYS12:CIT1:SDH2:ACO2:ARO2:ACO1	2:6597:6636:9396:1990355:6635:44262:162:9249:6561:9073:9089:6099:6544:32543:44416:22900:46356:19878:9070:6102:9097:6103:55114:9099:9086:6531:9107:9088:9083:15867:105:6546:6106:9098:9085:7031:71585:6730:70301:9082:9090:15940
44281	small molecule metabolic process	39 out of 169 genes, 23.1%	773 out of 13081 background genes, 5.9%	0.00033	0	ARO4:ANT1:MMD1:COX5:IDH1:SER33:TRP3:FAD3:C1_13330C_A:ATP18:MXR1:HOM2:COX6:BAT21:LYS22:CYT1:ILV2:C3_04080W_A:ATF1:RIP1:C3_06950W_A:PRO2:FUM12:LAB5:SDH12:C5_02190C_A:YNK1:HAM1:ILV3:GCV1:HIS7:MIS12:LYS12:URA5:CIT1:SDH2:ACO2:ARO2:ACO1	6974:61508:9060:30448:6597:6636:1990355:6635:44262:162:9073:9089:6099:44416:35786:46356:19878:15986:9070:6102:6123:9097:40009:6207:55114:46777:6531:6241:9107:9088:6979:15867:6546:6066:9085:6165:9082:51211:6122:2:9396:9249:6561:9213:32543:6544:22900:9217:6103:30643:9099:9086:46132:9083:6799:105:9098:6106:7031:33615:71585:6730:70301:9090:15940
16053	organic acid biosynthetic process	18 out of 169 genes, 10.7%	214 out of 13081 background genes, 1.6%	0.00059	0	ARO4:MMD1:SER33:TRP3:FAD3:C1_13330C_A:MXR1:HOM2:BAT21:LYS22:ILV2:PRO2:LAB5:ILV3:HIS7:MIS12:LYS12:ARO2	6597:6636:1990355:162:9073:9089:19878:9070:9097:55114:6531:9107:9088:9085:9082:2:9396:9249:6561:32543:9099:9086:9083:105:9098:71585:70301:9090:15940
46394	carboxylic acid biosynthetic process	18 out of 169 genes, 10.7%	214 out of 13081 background genes, 1.6%	0.00059	0	ARO4:MMD1:SER33:TRP3:FAD3:C1_13330C_A:MXR1:HOM2:BAT21:LYS22:ILV2:PRO2:LAB5:ILV3:HIS7:MIS12:LYS12:ARO2	6597:6636:1990355:162:9073:9089:19878:9070:9097:55114:6531:9107:9088:9085:9082:2:9396:9249:6561:32543:9099:9086:9083:105:9098:71585:70301:9090:15940
8652	cellular amino acid biosynthetic process	14 out of 169 genes, 8.3%	141 out of 13081 background genes, 1.1%	0.00141	0	ARO4:MMD1:SER33:TRP3:MXR1:HOM2:BAT21:LYS22:ILV2:PRO2:ILV3:HIS7:LYS12:ARO2	1990355:162:9073:9089:19878:9070:9097:55114:6531:9088:9085:9082:2:6561:32543:9099:9086:9083:105:9098:71585:70301:9090
22900	electron transport chain	7 out of 169 genes, 4.1%	37 out of 13081 background genes, 0.3%	0.00744	0	COX5:COX6:CYT1:C3_04080W_A:RIP1:SDH12:MCI4	9060:6099:6123:40009:32981:6122:22900:22904
9097	isoleucine biosynthetic process	4 out of 169 genes, 2.4%	8 out of 13081 background genes, 0.1%	0.0082	0	MMD1:HOM2:BAT21:ILV2	9089:9097:55114:6531:9088:2:32543:9099:9086:9083:9098:9090
9082	branched-chain amino acid biosynthetic process	5 out of 169 genes, 3.0%	17 out of 13081 background genes, 0.1%	0.01361	0	MMD1:HOM2:BAT21:ILV2:ILV3	9089:9097:55114:6531:9088:9082:2:32543:9099:9086:9083:9098:9090
6549	isoleucine metabolic process	4 out of 169 genes, 2.4%	9 out of 13081 background genes, 0.1%	0.01452	0	MMD1:HOM2:BAT21:ILV2	9089:9097:55114:6531:9088:2:32543:9099:9086:9083:9098:9090
44710	single-organism metabolic process	52 out of 169 genes, 30.8%	1402 out of 13081 background genes, 10.7%	0.03444	0.001	HMX1:ARO4:ANT1:MMD1:COX5:IDH1:SER33:TRP3:FAD3:C1_13330C_A:C2_00400C_A:ATP18:MXR1:HOM2:COX6:BAT21:LYS22:NDH51:CYT1:C2_09500W_A:ALI1:STE50:ILV2:C3_04080W_A:ATF1:RIP1:C3_06950W_A:FESUR1:PRO2:FUM12:LAB5:SDH12:C5_02190C_A:YNK1:HAM1:C5_05230C_A:ILV3:GPX2:GCV1:HIS7:RAD6:MAM33:MIS12:LYS12:URA5:MCI4:CIT1:SDH2:ACO2:ARO2:ACO1:CR_10140W_A	6974:61508:9060:30448:6597:6636:1900376:12501:1990355:6635:44262:162:9073:6353:9089:6099:31939:30447:161:44416:30433:35786:46356:19878:15986:1402:9070:6348:6102:6123:9097:722:40009:6207:70534:55114:46777:42149:6531:6241:9107:9088:6979:70987:34605:15867:71596:6546:6066:9085:6165:7232:42275:6400:31497:71455:750:724:9082:16226:51211:30437:71894:32981:6122:1990920:2:34644:71629:9396:42167:9249:6561:9…
22904	respiratory electron transport chain	6 out of 169 genes, 3.6%	34 out of 13081 background genes, 0.3%	0.04737	0.001	COX5:COX6:CYT1:C3_04080W_A:RIP1:MCI4	9060:6123:40009:32981:6122:22904
1901607	alpha-amino acid biosynthetic process	11 out of 169 genes, 6.5%	127 out of 13081 background genes, 1.0%	0.06083	0.0009	MMD1:SER33:TRP3:MXR1:HOM2:BAT21:LYS22:ILV2:PRO2:HIS7:LYS12	1990355:162:9089:19878:9070:9097:55114:6531:9088:9085:2:6561:32543:9099:9086:9083:105:9098:71585:70301:9090
9081	branched-chain amino acid metabolic process	5 out of 169 genes, 3.0%	23 out of 13081 background genes, 0.2%	0.06645	0.0009	MMD1:HOM2:BAT21:ILV2:ILV3	9089:9097:55114:6531:9088:9082:2:32543:9099:9086:9083:9098:9090

## Sheet: 4. GO process - basal DOWN
GO processes of all genes with decreased RNA PolII occupancy in cas5∆/cas5∆ mutant in comparison to the wild type strain under caspofungin treatment condition.
GOID	Go term	Cluster frequency	Background frequency	Corrected P-value	False discovery rate	Gene(s) annotated to the term	Directly Annotated GOID List
44419	interspecies interaction between organisms	22 out of 159 genes, 13.8%	323 out of 13081 background genes, 2.5%	0.00058	0	XOG1:TPS2:ERG3:CAT1:ATC1:PHO100:KEX2:HAP43:FTR1:SOD4:WH11:TPK2:DSE1:YWP1:ASH1:FOX2:SLK19:FET34:PLB1:ALS9:LIP8:ACE2	70879:43936:920:71469:36178:30448:1900439:1900445:43709:51701:10969:6635:44010:45944:42760:70887:33215:44114:2000220:30447:1903759:6801:31589:71361:43710:9395:10106:1900231:1315:71852:32955:44001:16042:55114:71216:6468:902:33212:9062:1900442:42149:42752:71281:71467:34605:1900760:6073:6950:6827:90375:1900436:31505:1900189:36176:36281:1904541:9847:36166:7323:16540:1900430:44406:44117:42744:60196:36…
44262	cellular carbohydrate metabolic process	14 out of 159 genes, 8.8%	137 out of 13081 background genes, 1.0%	0.00061	0	C1_01360C_A:XOG1:TPS2:ATC1:C1_14060W_A:BCY1:TPK2:ARA1:TPS3:FOX2:GDB1:GDE1:C6_02420W_A:GLK4	70879:43936:30448:5979:1900445:43709:34478:6635:44262:42760:44114:45762:46580:30447:1903759:1932:31589:9306:71361:97271:5978:1900231:55114:71216:6468:902:9062:42752:1900444:7163:34605:1900435:1900760:51666:6073:5991:1900436:31505:1904541:9847:19752:7186:33554:36180:6071:46827:36164:51447:71470:909:44409:7265:6355:10737:5993:34599:6097:9267:44011:8104:5992:60257:1403:71465:46475:70787:5980:10515:7…
16042	lipid catabolic process	9 out of 159 genes, 5.7%	55 out of 13081 background genes, 0.4%	0.00117	0	PLB4.5:FOX2:CAT2:YDC1:GDE1:PLB1:C6_02420W_A:LIP8:POT1	9437:34478:6635:42760:6084:9395:44001:16042:9062:45733:15976:45333:6071:36164:6097:44011:46475:35690:46514:9405:46513
44242	cellular lipid catabolic process	8 out of 159 genes, 5.0%	44 out of 13081 background genes, 0.3%	0.00197	0	PLB4.5:FOX2:CAT2:YDC1:GDE1:PLB1:C6_02420W_A:POT1	9437:34478:6635:42760:6084:9395:44001:9062:45733:15976:45333:6071:36164:6097:44011:46475:35690:46514:9405:46513
9405	pathogenesis	18 out of 159 genes, 11.3%	259 out of 13081 background genes, 2.0%	0.00479	0	TPS2:ERG3:CAT1:ATC1:PHO100:KEX2:HAP43:FTR1:WH11:TPK2:DSE1:ASH1:FOX2:SLK19:FET34:PLB1:LIP8:ACE2	43936:920:71469:36178:30448:1900439:1900445:43709:51701:10969:6635:45944:42760:70887:33215:44114:2000220:30447:1903759:71361:9395:10106:1900231:1315:71852:32955:44001:16042:71216:55114:6468:902:33212:9062:1900442:42149:42752:71281:71467:34605:1900760:6950:6827:90375:1900436:31505:1900189:36176:9847:36166:16540:7323:1900430:44117:42744:60196:36168:7186:44182:33554:36180:1900474:7155:98869:36164:71…
34599	cellular response to oxidative stress	13 out of 159 genes, 8.2%	147 out of 13081 background genes, 1.1%	0.00766	0.0033	C1_01300W_A:TPS2:CAT1:MSN4:GAD1:SOD4:TPK2:CMK1:CDR1:AHP1:C5_02110W_A:ALS9:PRX1	61405:43936:30448:1900445:43709:51701:44114:61407:36129:61408:30447:1903759:6801:45117:71406:71361:15903:43710:45454:6338:71483:1900231:1315:71216:55114:6468:902:10038:42752:1324:6855:61422:34605:1900760:10972:1900436:31505:61434:36281:46686:9847:71383:61404:42744:7186:33554:36180:7155:6538:98869:36164:71470:909:44409:71451:7265:61409:61410:61402:6355:61403:7009:52059:501:46618:42743:10737:5993:3…
31589	cell-substrate adhesion	7 out of 159 genes, 4.4%	43 out of 13081 background genes, 0.3%	0.01803	0.0057	XOG1:TPK2:DSE1:RBT5:C6_02420W_A:ALS9:ACE2	70879:43936:920:30448:1900439:1900445:43709:10969:34478:45944:70887:44114:30447:1903759:31589:71361:43710:1900231:32955:71216:6468:902:42149:42752:20028:34605:1900760:6073:1900436:31505:1900189:36281:1904541:9847:60196:44182:7186:33554:36180:6071:7155:36164:71555:909:44409:7265:10811:83:501:10737:5993:9267:44011:122:1403:70787:10515:2001043:36171:45014:70301:36170:6879:72353:35690:9405:44407
5975	carbohydrate metabolic process	16 out of 159 genes, 10.1%	235 out of 13081 background genes, 1.8%	0.02059	0.005	C1_01360C_A:XOG1:TPS2:ATC1:C1_14060W_A:BCY1:TPK2:ARA1:TPS3:FOX2:C3_03410C_A:GDB1:SOU1:GDE1:C6_02420W_A:GLK4	70879:43936:30448:5979:1900445:43709:34478:6635:44262:42760:44114:45762:46580:30447:1903759:1932:31589:9306:71361:97271:5978:1900231:55114:71216:6468:902:9062:42752:1900444:7163:34605:1900435:1900760:51666:6073:5991:1900436:31505:1904541:9847:19752:7186:33554:36180:6071:46827:36164:51447:71470:909:44409:7265:9311:6355:10737:5993:34599:6097:9267:44011:8104:5992:60257:1403:71465:46475:70787:42850:5…
44723	single-organism carbohydrate metabolic process	14 out of 159 genes, 8.8%	188 out of 13081 background genes, 1.4%	0.02481	0.0044	C1_01360C_A:XOG1:TPS2:ATC1:C1_14060W_A:BCY1:TPK2:TPS3:FOX2:C3_03410C_A:GDB1:SOU1:GDE1:C6_02420W_A	70879:43936:30448:5979:1900445:43709:34478:6635:42760:44114:45762:46580:30447:1903759:1932:31589:9306:71361:97271:5978:1900231:55114:71216:6468:902:9062:42752:1900444:7163:34605:1900435:1900760:51666:6073:5991:1900436:31505:1904541:9847:7186:33554:36180:6071:46827:36164:51447:71470:909:44409:7265:9311:6355:10737:5993:34599:6097:9267:44011:8104:5992:60257:1403:71465:46475:70787:42850:5980:10515:71…
7155	cell adhesion	8 out of 159 genes, 5.0%	62 out of 13081 background genes, 0.5%	0.02736	0.004	XOG1:TPK2:DSE1:RBT5:C5_02110W_A:C6_02420W_A:ALS9:ACE2	70879:43936:920:30448:1900439:1900445:43709:10969:34478:45944:70887:44114:30447:1903759:31589:71361:43710:1900231:32955:71216:6468:902:42149:42752:20028:34605:1900760:6073:10972:1900436:31505:1900189:36281:1904541:9847:60196:44182:7186:33554:36180:6071:7155:36164:71470:71555:909:44409:7265:10811:83:7009:501:10737:5993:34599:9267:44011:122:1403:70787:10515:2001043:36171:45014:70301:36170:6879:7235…
51704	multi-organism process	29 out of 159 genes, 18.2%	636 out of 13081 background genes, 4.9%	0.03143	0.0055	XOG1:TPS2:ERG3:CAT1:ATC1:PHO100:KEX2:HAP43:ROB1:C1_14060W_A:FTR1:SOD4:WH11:TPK2:DSE1:YWP1:ASH1:FOX2:SLK19:RBT5:CAT2:MET4:FET34:PLB1:ALS9:PRX1:LIP8:HHT2:ACE2	43936:36178:1900439:9437:1900445:43709:51701:10969:45944:42760:33215:30447:6084:31589:71361:45454:6338:32955:6468:6306:71467:34605:1900760:6073:6827:90375:1900436:15976:1900189:36176:36281:46686:1904541:9847:36166:7323:44406:42744:7094:6334:44182:33554:7155:71470:1900461:44409:71451:6696:10811:6351:5993:52559:34599:9267:44030:44011:60257:96:16584:70787:10515:1901684:42542:45014:36171:70301:36170:…
6979	response to oxidative stress	13 out of 159 genes, 8.2%	170 out of 13081 background genes, 1.3%	0.03612	0.005	C1_01300W_A:TPS2:CAT1:MSN4:GAD1:SOD4:TPK2:CMK1:CDR1:AHP1:C5_02110W_A:ALS9:PRX1	43936:1900445:43709:51701:61408:30447:71406:71361:45454:6338:71483:6468:1324:61422:34605:1900760:10972:1900436:36281:46686:9847:42744:33554:7155:71470:44409:71451:61409:61402:6355:61403:46618:5993:30003:34599:9267:44011:61395:60257:70787:10515:45332:42542:45014:36171:70301:36170:9405:61406:61412:61405:30448:44114:61407:36129:1903759:6801:45117:15903:43710:1900231:1315:71216:55114:902:10038:42752:…
9395	phospholipid catabolic process	4 out of 159 genes, 2.5%	11 out of 13081 background genes, 0.1%	0.0371	0.0046	PLB4.5:GDE1:PLB1:C6_02420W_A	6071:9405:34478:9395:44001:36164:46475:35690
9266	response to temperature stimulus	11 out of 159 genes, 6.9%	127 out of 13081 background genes, 1.0%	0.04498	0.0057	TPS2:PIL1:ATC1:MSN4:KEX2:BCY1:PIR1:C5_02110W_A:C5_03560W_A:ALS9:PHO81	5979:43709:45762:46580:31939:61408:30447:1932:71406:71361:97271:6338:71483:6468:1324:61422:34605:51666:10972:36281:1900432:7323:44182:46827:7155:71470:61188:61409:61402:6355:61403:5993:52559:34599:9267:61395:60257:6796:61186:70301:36170:90472:9405:61406:61412:61405:44114:61407:6886:16479:9306:43710:71852:71216:6629:42752:1900444:7163:1900435:5991:31505:10922:61434:16540:61404:36168:36180:51447:19…
43709	cell adhesion involved in single-species biofilm formation	5 out of 159 genes, 3.1%	22 out of 13081 background genes, 0.2%	0.05084	0.0093	TPK2:DSE1:RBT5:ALS9:ACE2	43936:1900439:1900445:43709:10969:45944:30447:71361:32955:6468:34605:1900760:1900436:1900189:36281:9847:44182:33554:7155:44409:10811:5993:9267:44011:70787:10515:36171:45014:70301:36170:6879:44407:9405:920:30448:70887:44114:1903759:43710:1900231:71216:902:42149:42752:20028:31505:60196:7186:36180:36164:71555:909:7265:83:501:10737:122:1403:2001043:72353:35690
5991	trehalose metabolic process	5 out of 159 genes, 3.1%	22 out of 13081 background genes, 0.2%	0.05084	0.0088	TPS2:ATC1:BCY1:TPK2:TPS3	43936:5979:1900445:43709:45762:46580:30447:1932:71361:97271:6468:34605:1900760:51666:1900436:9847:33554:46827:71470:44409:6355:5993:34599:9267:44011:60257:70787:10515:45014:36170:9405:30448:44114:1903759:9306:1900231:71216:902:42752:1900444:7163:1900435:5991:31505:7186:36180:36164:51447:909:7265:10737:8104:5992:1403:71465:7165:72353:71497
22610	biological adhesion	9 out of 159 genes, 5.7%	88 out of 13081 background genes, 0.7%	0.0585	0.0106	XOG1:TPK2:DSE1:YWP1:RBT5:C5_02110W_A:C6_02420W_A:ALS9:ACE2	43936:1900439:1900445:43709:10969:45944:30447:31589:71361:32955:6468:34605:1900760:6073:10972:1900436:1900189:36281:1904541:9847:44406:44182:33554:6071:7155:71470:44409:10811:5993:34599:9267:44011:70787:10515:36171:45014:70301:36170:6879:9405:44407:70879:920:30448:34478:44010:70887:44114:1903759:43710:1900231:71216:902:42149:42752:20028:31505:60196:7186:36180:36164:71555:909:7265:83:7009:501:1073…
71361	cellular response to ethanol	3 out of 159 genes, 1.9%	5 out of 13081 background genes, 0.0%	0.05948	0.01	ATC1:MSN4:ALS9	43709:61408:71406:71361:6338:71483:1324:61422:34605:36281:7155:61409:61402:6355:61403:5993:61395:70301:9405:61406:61412:61405:61407:43710:61434:61404:61410:501:1302:97236:71465:61401:71497
44010	single-species biofilm formation	11 out of 159 genes, 6.9%	136 out of 13081 background genes, 1.0%	0.08374	0.0126	XOG1:ROB1:WH11:TPK2:DSE1:YWP1:RBT5:CAT2:MET4:ALS9:ACE2	43936:1900439:9437:1900445:43709:10969:45944:30447:6084:31589:71361:6338:32955:6468:34605:1900760:6073:1900436:15976:1900189:36281:46686:1904541:9847:36166:44406:44182:33554:7155:44409:10811:6351:5993:9267:44011:96:16584:70787:10515:36171:45014:70301:36170:6879:9405:44407:70879:920:30448:6635:44010:70887:44114:1903759:43710:1900231:71216:902:6808:42149:42752:45733:20028:6950:31505:45333:60196:718…
44712	single-organism catabolic process	16 out of 159 genes, 10.1%	266 out of 13081 background genes, 2.0%	0.09077	0.012	ATC1:GAD1:PLB4.5:TPK2:FOX2:C3_06280W_A:CAT2:GDB1:SOU1:YDC1:GDE1:PLB1:C6_02420W_A:LAT1:LIP8:POT1	43936:9437:1900445:43709:42760:30447:6084:6567:71361:6468:1900760:1900436:15976:9847:33554:6071:44409:5993:34599:9267:44011:70787:42850:5980:10515:45014:36170:46514:9405:42867:30448:34478:6635:44114:1903759:5978:9395:1900231:44001:16042:55114:71216:902:9062:42752:45733:31505:6086:45333:7186:36180:6538:36164:909:7265:10737:6097:1403:71465:6565:46475:72353:35690:46513:71497
43708	cell adhesion involved in biofilm formation	5 out of 159 genes, 3.1%	25 out of 13081 background genes, 0.2%	0.09749	0.0114	TPK2:DSE1:RBT5:ALS9:ACE2	43936:1900439:1900445:43709:10969:45944:30447:71361:32955:6468:34605:1900760:1900436:1900189:36281:9847:44182:33554:7155:44409:10811:5993:9267:44011:70787:10515:36171:45014:70301:36170:6879:44407:9405:920:30448:70887:44114:1903759:43710:1900231:71216:902:42149:42752:20028:31505:60196:7186:36180:36164:71555:909:7265:83:501:10737:122:1403:2001043:72353:35690

## Sheet: 5. GO process - caspo UP
GO components of all genes with increased RNA PolII occupancy in cas5∆/cas5∆ mutant in comparison to the wild type strain under caspofungin treatment condition.
GOID	Go term	Cluster frequency	Background frequency	Corrected P-value	False discovery rate	Gene(s) annotated to the term	Directly Annotated GOID List
42254	ribosome biogenesis	63 out of 181 genes, 34.8%	318 out of 13081 background genes, 2.4%	1.04e-39	0	RRS1:TSR2:ARX1:C1_03830C_A:ERB1:C1_06540C_A:C1_07960W_A:DIP2:JIP5:C1_10620W_A:KRR1:GAR1:CSI2:DIM1:UTP21:C2_02540W_A:C2_06660W_A:C2_06850W_A:NOC4:NSA1:RRP8:UTP15:C2_08840W_A:RRP15:SOF1:BMS1:C3_01560W_A:C3_02350W_A:C3_02840W_A:MAK21:NOP14:NOG1:NSA2:RLP24:C4_00740W_A:HIT1:ZUO1:NAN1:C4_03740W_A:RRP42:ECM1:NOP1:C4_06950W_A:C5_03920C_A:C5_04910W_A:SPB1:NOP15:ENP2:ENP1:C7_04140C_A:UTP18:CR_00460C_A:PWP2…	16075:45943:920:31167:55:27:30447:71028:42274:463:71039:447:462:42254:71216:71038:492:1905267:480:30174:31120:294:467:71051:70476:8361:6970:30010:6450:34427:70317:56:34463:321:31118:6614:51211:71049:54:1901917:71035:470:1902626:469:36180:495:1522:34475:71033:42255:32880:70481:31054:973:466:16973:34476:30490:465:1904812:915:8033:34599:9267:6452:6267:6364:30488:1990258:464:1990481:154:34965:494:710…
22613	ribonucleoprotein complex biogenesis	64 out of 181 genes, 35.4%	392 out of 13081 background genes, 3.0%	5.34e-35	0	RRS1:TSR2:ARX1:C1_03830C_A:ERB1:C1_06540C_A:C1_07960W_A:DIP2:JIP5:C1_10620W_A:KRR1:GAR1:CSI2:DIM1:UTP21:C2_02540W_A:C2_06660W_A:C2_06790W_A:C2_06850W_A:NOC4:NSA1:RRP8:UTP15:C2_08840W_A:RRP15:SOF1:BMS1:C3_01560W_A:C3_02350W_A:C3_02840W_A:MAK21:NOP14:NOG1:NSA2:RLP24:C4_00740W_A:HIT1:ZUO1:NAN1:C4_03740W_A:RRP42:ECM1:NOP1:C4_06950W_A:C5_03920C_A:C5_04910W_A:SPB1:NOP15:ENP2:ENP1:C7_04140C_A:UTP18:CR_0…	16075:45943:920:9410:31167:55:27:30447:71028:42274:463:71039:447:45292:462:42254:71216:71038:492:1905267:480:30174:31120:294:71051:467:70476:8361:6970:30010:6450:34427:70317:56:34463:321:31118:6614:51211:71049:54:1901917:71035:470:1902626:469:36180:1522:495:34475:71033:42255:32880:70481:31054:466:973:16973:34476:30490:465:1904812:915:8033:34599:9267:6452:6267:30488:245:6364:1990258:464:1990481:15…
6364	rRNA processing	51 out of 181 genes, 28.2%	221 out of 13081 background genes, 1.7%	1.09e-34	0	RRS1:TSR2:C1_03830C_A:ERB1:C1_06540C_A:C1_07960W_A:DIP2:C1_10620W_A:KRR1:DIM1:UTP21:C2_02540W_A:C2_06660W_A:C2_06850W_A:NOC4:RRP8:UTP15:C2_08840W_A:RRP15:SOF1:BMS1:C3_01560W_A:C3_02350W_A:C3_02840W_A:NOP14:NOG1:NSA2:C4_00740W_A:HIT1:ZUO1:NAN1:C4_03740W_A:RRP42:NOP1:C4_06950W_A:C5_03920C_A:C5_04910W_A:SPB1:ENP2:ENP1:UTP18:CR_00460C_A:PWP2:CR_02550C_A:CR_03940W_A:CR_04240C_A:RPL7:CR_07750C_A:NOP10:…	16075:45943:920:31167:55:27:30447:71028:42274:463:71039:447:462:71216:71038:492:1905267:480:30174:31120:294:71051:467:70476:8361:30010:6450:34427:70317:56:34463:321:31118:6614:51211:71049:54:1901917:71035:470:1902626:469:36180:1522:495:34475:71033:42255:70481:31054:466:973:34476:30490:465:1904812:8033:9267:6452:6267:30488:6364:1990258:464:1990481:154:34965:494:71042:6897:747:18364:42273:390:36170…
16072	rRNA metabolic process	51 out of 181 genes, 28.2%	234 out of 13081 background genes, 1.8%	2.34e-33	0	RRS1:TSR2:C1_03830C_A:ERB1:C1_06540C_A:C1_07960W_A:DIP2:C1_10620W_A:KRR1:DIM1:UTP21:C2_02540W_A:C2_06660W_A:C2_06850W_A:NOC4:RRP8:UTP15:C2_08840W_A:RRP15:SOF1:BMS1:C3_01560W_A:C3_02350W_A:C3_02840W_A:NOP14:NOG1:NSA2:C4_00740W_A:HIT1:ZUO1:NAN1:C4_03740W_A:RRP42:NOP1:C4_06950W_A:C5_03920C_A:C5_04910W_A:SPB1:ENP2:ENP1:UTP18:CR_00460C_A:PWP2:CR_02550C_A:CR_03940W_A:CR_04240C_A:RPL7:CR_07750C_A:NOP10:…	16075:45943:920:31167:55:27:30447:71028:42274:463:71039:447:462:71216:71038:492:1905267:480:30174:31120:294:71051:467:70476:8361:30010:6450:34427:70317:56:34463:321:31118:6614:51211:71049:54:1901917:71035:470:1902626:469:36180:1522:495:34475:71033:42255:70481:31054:466:973:34476:30490:465:1904812:8033:9267:6452:6267:30488:6364:1990258:464:1990481:154:34965:494:71042:6897:747:18364:42273:390:36170…
34470	ncRNA processing	55 out of 181 genes, 30.4%	330 out of 13081 background genes, 2.5%	8.24e-30	0	RRS1:TSR2:C1_03830C_A:ERB1:C1_06540C_A:C1_07960W_A:DIP2:C1_10620W_A:KRR1:DIM1:UTP21:C2_02540W_A:KTI11:C2_06660W_A:C2_06850W_A:NOC4:RRP8:UTP15:C2_08840W_A:RRP15:SOF1:BMS1:C3_01560W_A:C3_02350W_A:C3_02840W_A:NOP14:NOG1:NSA2:C4_00740W_A:HIT1:ZUO1:NAN1:C4_03740W_A:RRP42:C4_04520W_A:NOP1:C4_06950W_A:C5_03920C_A:C5_04910W_A:SPB1:C7_02340C_A:ENP2:ENP1:UTP18:CR_00460C_A:PWP2:CR_02550C_A:NCS2:CR_03940W_A:…	16075:45943:2143:920:32447:31167:55:27:30447:71028:42274:463:71039:447:462:71216:71038:492:1905267:480:30174:31120:294:71051:467:17183:70476:8361:30010:6450:34427:70317:56:34463:321:31118:6614:51211:71049:54:1901917:71035:470:1902626:469:36180:1522:495:34475:71033:42255:70481:31054:466:973:34476:30490:465:1904812:8033:2098:7124:9267:6452:32211:6267:30488:6364:1990258:464:1990481:1403:154:34965:49…
34660	ncRNA metabolic process	60 out of 181 genes, 33.1%	434 out of 13081 background genes, 3.3%	3.07e-28	0	RRS1:TSR2:C1_03830C_A:ERB1:C1_06540C_A:C1_07960W_A:DIP2:C1_10620W_A:KRR1:GAR1:DIM1:UTP21:C2_02540W_A:KTI11:C2_06660W_A:C2_06850W_A:RPA12:NOC4:RRP8:UTP15:C2_08840W_A:RRP15:SOF1:BMS1:C3_01560W_A:C3_02350W_A:C3_02840W_A:NOP14:NOG1:NSA2:C4_00740W_A:HIT1:ZUO1:NAN1:C4_03740W_A:RRP42:C4_04520W_A:NOP1:C4_06950W_A:RPO26:C5_03920C_A:C5_04910W_A:SPB1:C7_02340C_A:ENP2:ENP1:UTP18:CR_00460C_A:PWP2:RPC19:CR_025…	16075:45943:2143:920:6363:32447:31167:55:27:30447:71028:42274:463:42797:71039:447:462:42254:71216:71038:492:1905267:480:30174:31120:294:71051:467:17183:70476:8361:30010:6450:34427:70317:56:34463:321:31118:6614:51211:71049:54:1901917:71035:6360:470:1902626:469:36180:1522:495:34475:71033:42255:70481:31054:466:973:34476:30490:465:1904812:6366:8033:2098:7124:9267:6452:32211:6267:30488:6364:1990258:46…
6396	RNA processing	60 out of 181 genes, 33.1%	482 out of 13081 background genes, 3.7%	1.16e-25	0	RRS1:C1_02090C_A:TSR2:C1_03830C_A:ERB1:C1_06540C_A:C1_07960W_A:DIP2:C1_10620W_A:KRR1:DIM1:C2_02300W_A:UTP21:C2_02540W_A:KTI11:SMD2:C2_06660W_A:C2_06790W_A:C2_06850W_A:NOC4:RRP8:UTP15:C2_08840W_A:RRP15:SOF1:BMS1:C3_01560W_A:C3_02350W_A:C3_02840W_A:NOP14:NOG1:NSA2:C4_00740W_A:HIT1:ZUO1:NAN1:C4_03740W_A:RRP42:C4_04520W_A:NOP1:C4_06950W_A:C5_01310W_A:C5_03920C_A:C5_04910W_A:SPB1:C7_02340C_A:ENP2:ENP1…	16075:45943:398:2143:6397:920:9410:32447:31167:55:27:30447:71028:42274:463:71039:447:45292:462:71216:71038:492:1905267:480:30174:31120:294:71051:467:17183:70476:8361:30010:6450:34427:70317:56:34463:321:31118:6614:51211:71049:54:1901917:71035:470:1902626:469:36180:1522:495:34475:71033:42255:70481:31054:466:973:34476:30490:465:1904812:8033:2098:7124:9267:6452:32211:6267:30488:245:6364:1990258:464:1…
44085	cellular component biogenesis	78 out of 181 genes, 43.1%	997 out of 13081 background genes, 7.6%	3.27e-21	0	RRS1:TSR2:ARX1:C1_03830C_A:ERB1:C1_06540C_A:C1_06640C_A:C1_06840C_A:C1_07960W_A:DIP2:JIP5:C1_09020W_A:C1_10620W_A:KRR1:GAR1:CSI2:CDC54:DIM1:C2_01320W_A:C2_01720C_A:SAM37:UTP21:C2_02540W_A:CDC46:C2_06660W_A:C2_06790W_A:C2_06850W_A:NOC4:MCM3:NSA1:RRP8:UTP15:C2_08840W_A:RRP15:SOF1:BMS1:C3_01560W_A:C3_02350W_A:C3_02840W_A:MAK21:NOP14:NOG1:NSA2:C4_00330C_A:RLP24:C4_00740W_A:HIT1:ZUO1:NAN1:C4_03740W_A:…	16075:45943:51123:32:920:9410:6279:45944:32968:31167:6270:55:31939:27:30447:71028:42274:463:48478:35786:71039:15986:447:6348:45292:70096:462:71852:42254:55114:71216:71038:492:1905267:15914:7021:480:30174:31120:294:71051:467:70476:8361:6970:30010:6450:34427:70317:56:34463:43248:321:31118:6614:51211:30437:71049:42407:54:1901917:32981:71035:470:6457:1902626:469:36180:727:1522:71629:495:34475:6343:65…
460	maturation of 5.8S rRNA	26 out of 181 genes, 14.4%	84 out of 13081 background genes, 0.6%	6.04e-20	0	RRS1:C1_03830C_A:C1_06540C_A:C1_07960W_A:DIP2:KRR1:C2_02540W_A:C2_06660W_A:NOC4:RRP15:C3_01560W_A:C3_02350W_A:C3_02840W_A:NOP14:NSA2:C4_03740W_A:RRP42:C5_03920C_A:SPB1:ENP1:UTP18:PWP2:CR_02550C_A:RPL7:CR_07750C_A:CR_09800C_A	16075:920:31167:55:30447:71028:463:71039:447:462:71216:71038:1905267:480:294:71051:467:30010:34427:34463:71049:1901917:71035:36180:34475:71033:42255:70481:31054:466:973:34476:465:9267:464:34965:71042:42273:390:36170:472:35690
466	maturation of 5.8S rRNA from tricistronic rRNA transcript (SSU-rRNA, 5.8S rRNA, LSU-rRNA)	26 out of 181 genes, 14.4%	84 out of 13081 background genes, 0.6%	6.04e-20	0	RRS1:C1_03830C_A:C1_06540C_A:C1_07960W_A:DIP2:KRR1:C2_02540W_A:C2_06660W_A:NOC4:RRP15:C3_01560W_A:C3_02350W_A:C3_02840W_A:NOP14:NSA2:C4_03740W_A:RRP42:C5_03920C_A:SPB1:ENP1:UTP18:PWP2:CR_02550C_A:RPL7:CR_07750C_A:CR_09800C_A	16075:920:31167:55:30447:71028:463:71039:447:462:71216:71038:1905267:480:294:71051:467:30010:34427:34463:71049:1901917:71035:36180:34475:71033:42255:70481:31054:466:973:34476:465:9267:464:34965:71042:42273:390:36170:472:35690
16070	RNA metabolic process	68 out of 181 genes, 37.6%	854 out of 13081 background genes, 6.5%	4e-18	0	RRS1:C1_02090C_A:TSR2:C1_03830C_A:ERB1:C1_06540C_A:C1_07960W_A:DIP2:C1_10620W_A:KRR1:GAR1:DIM1:C2_02300W_A:UTP21:C2_02540W_A:KTI11:SMD2:C2_06660W_A:C2_06790W_A:C2_06850W_A:RPA12:NOC4:RRP8:UTP15:C2_08840W_A:RRP15:SOF1:BMS1:C3_01560W_A:C3_02350W_A:C3_02840W_A:NOP14:NOG1:NSA2:C3_07050W_A:C4_00740W_A:HIT1:ZUO1:NAN1:C4_03740W_A:RRP42:C4_04520W_A:NOP1:C4_06950W_A:C5_00280C_A:C5_01310W_A:RPO26:C5_03920C…	16075:45943:398:2143:51123:6397:920:9410:6363:32447:51568:45944:31167:55:27:30447:71028:42274:463:42797:71039:447:45292:462:42254:71216:71038:492:1905267:6401:480:30174:6310:31120:294:71051:467:17183:6995:70476:8361:30010:6450:34427:70317:56:34463:321:31118:6614:51211:71049:54:1901917:71035:6360:6368:470:1902626:469:36180:1522:495:34475:71033:42255:32880:70481:31054:466:973:16973:34476:30490:465:…
42274	ribosomal small subunit biogenesis	28 out of 181 genes, 15.5%	121 out of 13081 background genes, 0.9%	8.34e-18	0	RRS1:TSR2:DIP2:KRR1:DIM1:C2_02540W_A:C2_06850W_A:NOC4:UTP15:C2_08840W_A:SOF1:BMS1:C3_01560W_A:C3_02350W_A:C3_02840W_A:NOP14:NAN1:C5_03920C_A:C5_04910W_A:ENP2:ENP1:C7_04140C_A:UTP18:CR_00460C_A:PWP2:CR_04240C_A:ELF1:CR_09800C_A	45943:920:55:30447:42274:463:447:462:71216:1905267:480:294:70476:30010:6970:70317:56:34463:321:6614:470:36180:42255:32880:466:16973:30490:1904812:34599:9267:6364:30488:464:154:34965:18364:42273:390:36170:472:35690
469	cleavage involved in rRNA processing	23 out of 181 genes, 12.7%	78 out of 13081 background genes, 0.6%	6.97e-17	0	RRS1:C1_03830C_A:C1_06540C_A:C1_07960W_A:DIP2:KRR1:C2_02540W_A:C2_06660W_A:NOC4:BMS1:C3_02350W_A:C3_02840W_A:NOP14:C4_03740W_A:RRP42:C5_03920C_A:ENP1:UTP18:PWP2:CR_02550C_A:RPL7:NOP10:CR_09800C_A	16075:920:55:30447:71028:463:71039:447:71216:71038:1905267:480:31120:294:71051:467:30010:34427:34463:31118:6614:71049:1901917:71035:469:36180:34475:71033:42255:70481:31054:973:34476:465:9267:464:34965:71042:42273:36170:472:35690
30490	maturation of SSU-rRNA	25 out of 181 genes, 13.8%	103 out of 13081 background genes, 0.8%	3.13e-16	0	RRS1:TSR2:DIP2:KRR1:DIM1:C2_02540W_A:C2_06850W_A:NOC4:UTP15:C2_08840W_A:SOF1:BMS1:C3_01560W_A:C3_02350W_A:C3_02840W_A:NOP14:NAN1:C5_03920C_A:C5_04910W_A:ENP2:ENP1:UTP18:PWP2:CR_04240C_A:CR_09800C_A	45943:920:55:30447:463:447:462:71216:1905267:480:294:70476:30010:70317:56:34463:321:6614:470:36180:42255:466:30490:1904812:9267:30488:464:154:34965:18364:42273:390:36170:472:35690
462	maturation of SSU-rRNA from tricistronic rRNA transcript (SSU-rRNA, 5.8S rRNA, LSU-rRNA)	23 out of 181 genes, 12.7%	91 out of 13081 background genes, 0.7%	3.27e-15	0	RRS1:TSR2:DIP2:KRR1:DIM1:C2_02540W_A:C2_06850W_A:NOC4:UTP15:SOF1:BMS1:C3_01560W_A:C3_02350W_A:C3_02840W_A:NOP14:NAN1:C5_03920C_A:C5_04910W_A:ENP2:ENP1:UTP18:PWP2:CR_09800C_A	45943:920:55:30447:463:447:462:71216:1905267:480:294:30010:56:34463:321:6614:36180:42255:466:9267:464:154:34965:42273:390:36170:472:35690
90501	RNA phosphodiester bond hydrolysis	23 out of 181 genes, 12.7%	101 out of 13081 background genes, 0.8%	4.08e-14	0	RRS1:C1_03830C_A:C1_06540C_A:C1_07960W_A:DIP2:KRR1:C2_02540W_A:C2_06660W_A:NOC4:BMS1:C3_02350W_A:C3_02840W_A:NOP14:C4_03740W_A:RRP42:C5_03920C_A:ENP1:UTP18:PWP2:CR_02550C_A:RPL7:NOP10:CR_09800C_A	16075:920:55:30447:71028:463:71039:447:71216:71038:1905267:480:31120:294:71051:467:30010:34427:34463:31118:6614:71049:1901917:71035:469:36180:34475:71033:42255:70481:31054:973:34476:465:9267:464:34965:71042:42273:36170:472:35690
10467	gene expression	73 out of 181 genes, 40.3%	1202 out of 13081 background genes, 9.2%	5.14e-13	0	RRS1:C1_01950C_A:C1_02090C_A:TSR2:C1_03830C_A:ERB1:C1_06540C_A:C1_07960W_A:DIP2:C1_10620W_A:KRR1:DIM1:C2_02300W_A:UTP21:C2_02540W_A:KTI11:SMD2:C2_06660W_A:C2_06790W_A:C2_06850W_A:RPA12:NOC4:RRP8:UTP15:C2_08840W_A:RRP15:SOF1:BMS1:C3_01560W_A:C3_02350W_A:C3_02840W_A:NOP14:NOG1:NSA2:C3_07050W_A:C4_00740W_A:HIT1:ZUO1:NAN1:C4_03740W_A:RRP42:C4_04520W_A:RCE1:IMG2:NOP1:C4_06950W_A:IMP2:C5_01310W_A:C5_03…	16075:45943:398:2143:51123:6397:920:9410:6363:71586:32447:51568:45944:31167:55:27:30447:71028:42274:463:42797:71039:447:45292:462:71216:71038:492:1905267:480:30174:31120:294:71051:467:17183:70476:8361:30010:6450:34427:70317:56:34463:321:31118:6614:51211:71049:54:1901917:6627:71035:6360:6368:470:1902626:469:36180:1522:495:34475:71033:42255:32880:70481:31054:32543:71432:466:973:16973:34476:30490:46…
90305	nucleic acid phosphodiester bond hydrolysis	24 out of 181 genes, 13.3%	125 out of 13081 background genes, 1.0%	5.37e-13	0	RRS1:C1_03830C_A:C1_06540C_A:C1_07960W_A:DIP2:KRR1:C2_02540W_A:C2_06660W_A:NOC4:BMS1:C3_02350W_A:C3_02840W_A:NOP14:C4_03740W_A:RRP42:C5_00280C_A:C5_03920C_A:ENP1:UTP18:PWP2:CR_02550C_A:RPL7:NOP10:CR_09800C_A	16075:920:55:30447:71028:463:71039:447:71216:71038:1905267:6401:480:31120:6310:294:71051:467:6995:30010:34427:34463:31118:6614:71049:1901917:71035:469:36180:34475:71033:42255:70481:31054:973:34476:465:6309:9267:464:34965:71042:42273:36170:472:35690
90304	nucleic acid metabolic process	72 out of 181 genes, 39.8%	1185 out of 13081 background genes, 9.1%	8.92e-13	0	RRS1:C1_02090C_A:TSR2:C1_03830C_A:ERB1:C1_06540C_A:C1_07960W_A:DIP2:C1_10620W_A:KRR1:GAR1:CDC54:DIM1:C2_02300W_A:UTP21:C2_02540W_A:KTI11:SMD2:CDC46:C2_06660W_A:C2_06790W_A:C2_06850W_A:RPA12:NOC4:MCM3:RRP8:UTP15:C2_08840W_A:RRP15:SOF1:BMS1:C3_01560W_A:C3_02350W_A:C3_02840W_A:NOP14:NOG1:NSA2:C3_07050W_A:C4_00740W_A:HIT1:ZUO1:NAN1:C4_03740W_A:RRP42:C4_04520W_A:NOP1:C4_06950W_A:C5_00280C_A:C5_01310W_…	16075:45943:398:2143:51123:6397:920:9410:6363:32447:51568:6279:45944:31167:6270:55:27:31939:30447:71028:42274:463:48478:42797:71039:447:6348:45292:462:42254:71216:71038:492:1905267:6401:480:6310:30174:31120:294:71051:467:17183:6995:70476:8361:30010:6450:34427:70317:56:34463:321:31118:6614:51211:71049:54:1901917:71035:6360:6368:470:1902626:469:36180:727:1522:495:34475:6343:71033:42255:32880:70481:…
42273	ribosomal large subunit biogenesis	21 out of 181 genes, 11.6%	97 out of 13081 background genes, 0.7%	2.93e-12	0	RRS1:ERB1:JIP5:CSI2:C2_02540W_A:NSA1:RRP8:C2_08840W_A:RRP15:C3_01560W_A:MAK21:NOG1:NSA2:RLP24:HIT1:SPB1:NOP15:CR_03940W_A:RPL7:CR_07750C_A:SSF1	31167:55:30447:27:463:447:462:71216:492:480:30174:70476:8361:34463:54:470:1902626:36180:42255:466:30490:465:915:9267:6267:30488:6364:464:747:18364:42273:390:36170:472:35690
6139	nucleobase-containing compound metabolic process	75 out of 181 genes, 41.4%	1418 out of 13081 background genes, 10.8%	3.24e-10	0	RRS1:C1_02090C_A:TSR2:C1_03830C_A:ERB1:C1_06540C_A:C1_07960W_A:DIP2:C1_10620W_A:KRR1:GAR1:CDC54:DIM1:C2_02300W_A:UTP21:C2_02540W_A:KTI11:SMD2:CDC46:C2_06660W_A:C2_06790W_A:C2_06850W_A:RPA12:NOC4:MCM3:RRP8:UTP15:C2_08840W_A:RRP15:SOF1:BMS1:C3_01560W_A:C3_02350W_A:C3_02840W_A:NOP14:NOG1:NSA2:C3_07050W_A:C4_00330C_A:C4_00740W_A:HIT1:ZUO1:NAN1:C4_03740W_A:RRP42:C4_04520W_A:NOP1:C4_06950W_A:C5_00280C_…	398:6397:9410:6363:6279:45944:6270:55:27:31939:30447:42274:463:48478:35786:42797:45292:42254:71038:19858:492:1905267:6401:30174:294:17183:6995:8361:30010:6450:34427:19255:34463:321:6614:42407:1901917:71035:6360:6368:1902626:727:495:71033:70481:31054:973:34476:30490:465:6366:30466:6309:9267:30488:6267:1990481:154:494:71042:747:16578:18364:42273:51097:6271:36170:45943:16075:51123:2143:920:8655:5156…
46483	heterocycle metabolic process	77 out of 181 genes, 42.5%	1525 out of 13081 background genes, 11.7%	1.55e-09	0	RRS1:C1_02090C_A:TSR2:C1_03830C_A:ERB1:C1_06540C_A:C1_07960W_A:DIP2:C1_10620W_A:KRR1:GAR1:CDC54:DIM1:C2_02300W_A:UTP21:C2_02540W_A:KTI11:SMD2:CDC46:C2_06660W_A:C2_06790W_A:C2_06850W_A:RPA12:NOC4:MCM3:RRP8:UTP15:C2_08840W_A:RRP15:SOF1:BMS1:C3_01560W_A:C3_02350W_A:C3_02840W_A:NOP14:NOG1:NSA2:C3_07050W_A:C4_00330C_A:C4_00740W_A:HIT1:ZUO1:NAN1:C4_03740W_A:RRP42:C4_04520W_A:NOP1:C4_06950W_A:C5_00280C_…	398:6397:9410:6363:6279:45944:6270:55:27:31939:30447:42274:463:48478:35786:46654:42797:45292:42254:71038:19858:492:1905267:6401:30174:294:17183:6995:10133:8361:30010:6450:34427:19255:34463:321:6614:42407:1901917:71035:6360:6368:1902626:727:495:71033:70481:31054:973:34476:30490:465:6366:30466:6309:9267:30488:6267:1990481:154:494:71042:747:16578:18364:42273:51097:6271:36170:16075:45943:2143:51123:9…
6725	cellular aromatic compound metabolic process	76 out of 181 genes, 42.0%	1509 out of 13081 background genes, 11.5%	2.73e-09	0	RRS1:C1_02090C_A:TSR2:C1_03830C_A:ERB1:C1_06540C_A:C1_07960W_A:DIP2:C1_10620W_A:KRR1:GAR1:CDC54:DIM1:C2_02300W_A:UTP21:C2_02540W_A:KTI11:SMD2:CDC46:C2_06660W_A:C2_06790W_A:C2_06850W_A:RPA12:NOC4:MCM3:RRP8:UTP15:C2_08840W_A:RRP15:SOF1:BMS1:C3_01560W_A:C3_02350W_A:C3_02840W_A:NOP14:NOG1:NSA2:C3_07050W_A:C4_00330C_A:C4_00740W_A:HIT1:ZUO1:NAN1:C4_03740W_A:RRP42:C4_04520W_A:NOP1:C4_06950W_A:C5_00280C_…	398:6397:9410:6363:6279:45944:6270:55:27:31939:30447:42274:463:48478:35786:46654:42797:45292:42254:71038:19858:492:1905267:6401:30174:294:17183:6995:8361:30010:6450:34427:19255:34463:321:6614:42407:1901917:71035:6360:6368:1902626:727:495:71033:70481:31054:973:34476:30490:465:6366:30466:6309:9267:30488:6267:1990481:154:494:71042:747:16578:18364:42273:51097:6271:36170:16075:45943:2143:51123:920:865…
447	endonucleolytic cleavage in ITS1 to separate SSU-rRNA from 5.8S rRNA and LSU-rRNA from tricistronic rRNA transcript (SSU-rRNA, 5.8S rRNA, LSU-rRNA)	13 out of 181 genes, 7.2%	44 out of 13081 background genes, 0.3%	7.63e-09	0	RRS1:DIP2:KRR1:C2_02540W_A:NOC4:C3_02350W_A:C3_02840W_A:NOP14:C5_03920C_A:ENP1:UTP18:PWP2:CR_09800C_A	55:30447:1905267:294:30010:34463:9267:42273:36170:920:447:71216:480:36180:42255:464:34965:472:35690
478	endonucleolytic cleavage involved in rRNA processing	14 out of 181 genes, 7.7%	55 out of 13081 background genes, 0.4%	1.15e-08	0	RRS1:DIP2:KRR1:C2_02540W_A:NOC4:BMS1:C3_02350W_A:C3_02840W_A:NOP14:C5_03920C_A:ENP1:UTP18:PWP2:CR_09800C_A	55:30447:1905267:294:30010:34463:6614:9267:42273:36170:920:447:71216:480:36180:42255:464:34965:472:35690
479	endonucleolytic cleavage of tricistronic rRNA transcript (SSU-rRNA, 5.8S rRNA, LSU-rRNA)	14 out of 181 genes, 7.7%	55 out of 13081 background genes, 0.4%	1.15e-08	0	RRS1:DIP2:KRR1:C2_02540W_A:NOC4:BMS1:C3_02350W_A:C3_02840W_A:NOP14:C5_03920C_A:ENP1:UTP18:PWP2:CR_09800C_A	55:30447:1905267:294:30010:34463:6614:9267:42273:36170:920:447:71216:480:36180:42255:464:34965:472:35690
1901360	organic cyclic compound metabolic process	77 out of 181 genes, 42.5%	1598 out of 13081 background genes, 12.2%	1.79e-08	0	RRS1:C1_02090C_A:TSR2:C1_03830C_A:ERB1:C1_06540C_A:C1_07960W_A:DIP2:C1_10620W_A:KRR1:GAR1:CDC54:DIM1:C2_02300W_A:UTP21:C2_02540W_A:KTI11:SMD2:CDC46:C2_06660W_A:C2_06790W_A:C2_06850W_A:RPA12:NOC4:MCM3:RRP8:UTP15:C2_08840W_A:RRP15:SOF1:BMS1:C3_01560W_A:C3_02350W_A:C3_02840W_A:NOP14:NOG1:NSA2:C3_07050W_A:C4_00330C_A:C4_00740W_A:HIT1:ZUO1:NAN1:C4_03740W_A:RRP42:C4_04520W_A:NOP1:C4_06950W_A:C5_00280C_…	398:6397:9410:6363:6279:45944:6270:55:27:31939:30447:42274:463:48478:35786:46654:42797:45292:42254:71038:19858:492:1905267:6401:30174:294:17183:6995:10133:8361:30010:6450:34427:19255:34463:321:6614:42407:1901917:71035:6360:6368:1902626:727:495:71033:70481:31054:973:34476:30490:465:6366:30466:6309:9267:30488:6267:1990481:154:494:71042:747:16578:18364:42273:51097:6271:36170:16075:45943:2143:51123:9…
90502	RNA phosphodiester bond hydrolysis, endonucleolytic	14 out of 181 genes, 7.7%	59 out of 13081 background genes, 0.5%	3.24e-08	0	RRS1:DIP2:KRR1:C2_02540W_A:NOC4:BMS1:C3_02350W_A:C3_02840W_A:NOP14:C5_03920C_A:ENP1:UTP18:PWP2:CR_09800C_A	55:30447:1905267:294:30010:34463:6614:9267:42273:36170:920:447:71216:480:36180:42255:464:34965:472:35690
154	rRNA modification	9 out of 181 genes, 5.0%	22 out of 13081 background genes, 0.2%	4.16e-07	0	C1_10620W_A:DIM1:RRP8:C2_08840W_A:NOP1:C4_06950W_A:SPB1:CR_04240C_A:NOP10	463:30010:495:30490:30488:1990481:154:494:18364:42273:31167:462:31120:70476:70317:31118:51211:470:469:1522:466:1904812:8033:1990258:6897
71840	cellular component organization or biogenesis	88 out of 181 genes, 48.6%	2095 out of 13081 background genes, 16.0%	5.23e-07	0	RRS1:TIM21:TSR2:ARX1:C1_03830C_A:ERB1:C1_06540C_A:C1_06640C_A:C1_06840C_A:C1_07960W_A:DIP2:JIP5:C1_09020W_A:C1_10620W_A:KRR1:GAR1:CSI2:CDC54:DIM1:C2_01320W_A:C2_01720C_A:SAM37:UTP21:C2_02540W_A:CDC46:C2_06660W_A:C2_06790W_A:C2_06850W_A:NOC4:MCM3:NSA1:RRP8:UTP15:C2_08840W_A:RRP15:SOF1:BMS1:C3_01560W_A:C3_02350W_A:C3_02840W_A:MAK21:NOP14:NOG1:NSA2:C3_07050W_A:C4_00330C_A:RLP24:C4_00740W_A:SOD1:HIT1…	32:9410:1320:6279:45944:6270:55:31939:27:30447:42274:463:48478:7623:35786:45454:6882:71846:45292:42254:71038:492:1905267:15914:6401:30174:294:6995:8361:30010:6450:34427:34463:43248:321:6614:42407:1901917:6627:71035:6368:1902626:727:495:6511:71033:70481:31054:32543:973:34476:30490:465:915:30466:6309:34599:9267:16573:30488:6267:1990481:17198:154:494:71042:43153:747:16578:18364:42273:51097:6271:3617…
470	maturation of LSU-rRNA	11 out of 181 genes, 6.1%	42 out of 13081 background genes, 0.3%	1.26e-06	0	C2_02540W_A:C2_08840W_A:RRP15:C3_01560W_A:NSA2:HIT1:SPB1:CR_03940W_A:RPL7:CR_07750C_A:SSF1	27:463:492:30174:8361:34463:30490:465:6267:30488:747:18364:31167:447:462:480:70476:470:466:464:390:472
34471	ncRNA 5'-end processing	10 out of 181 genes, 5.5%	33 out of 13081 background genes, 0.3%	1.42e-06	0	DIP2:C2_02540W_A:NOC4:BMS1:NOP14:C5_03920C_A:UTP18:PWP2:RPL7:CR_09800C_A	30447:463:30010:34463:6614:465:9267:36170:920:447:71216:480:36180:464:472:35690
967	rRNA 5'-end processing	10 out of 181 genes, 5.5%	33 out of 13081 background genes, 0.3%	1.42e-06	0	DIP2:C2_02540W_A:NOC4:BMS1:NOP14:C5_03920C_A:UTP18:PWP2:RPL7:CR_09800C_A	30447:463:30010:34463:6614:465:9267:36170:920:447:71216:480:36180:464:472:35690
459	exonucleolytic trimming involved in rRNA processing	8 out of 181 genes, 4.4%	18 out of 13081 background genes, 0.1%	1.71e-06	0	C1_03830C_A:C1_06540C_A:C1_07960W_A:C2_06660W_A:C4_03740W_A:RRP42:CR_02550C_A:RPL7	463:71038:34427:1901917:71035:71033:70481:31054:973:34476:465:71042:16075:71028:71039:71051:467:71049:34475
90503	RNA phosphodiester bond hydrolysis, exonucleolytic	8 out of 181 genes, 4.4%	18 out of 13081 background genes, 0.1%	1.71e-06	0	C1_03830C_A:C1_06540C_A:C1_07960W_A:C2_06660W_A:C4_03740W_A:RRP42:CR_02550C_A:RPL7	463:71038:34427:1901917:71035:71033:70481:31054:973:34476:465:71042:16075:71028:71039:71051:467:71049:34475
966	RNA 5'-end processing	10 out of 181 genes, 5.5%	34 out of 13081 background genes, 0.3%	1.98e-06	0	DIP2:C2_02540W_A:NOC4:BMS1:NOP14:C5_03920C_A:UTP18:PWP2:RPL7:CR_09800C_A	30447:463:30010:34463:6614:465:9267:36170:920:447:71216:480:36180:464:472:35690
44260	cellular macromolecule metabolic process	91 out of 181 genes, 50.3%	2294 out of 13081 background genes, 17.5%	4.81e-06	0	RRS1:C1_01950C_A:C1_02090C_A:TSR2:SKO1:C1_03830C_A:ERB1:C1_06540C_A:C1_07960W_A:DIP2:C1_10620W_A:KRR1:GAR1:CDC54:DIM1:C1_14160W_A:C2_01060C_A:C2_01320W_A:C2_02300W_A:UTP21:C2_02540W_A:KTI11:C2_05840W_A:SMD2:CDC46:C2_06660W_A:C2_06790W_A:C2_06850W_A:RPA12:NOC4:MCM3:RRP8:UTP15:C2_08840W_A:RRP15:SOF1:BMS1:C3_01560W_A:C3_02350W_A:C3_02840W_A:NOP14:SKN1:NOG1:NSA2:C3_07050W_A:C4_00740W_A:HIT1:ZUO1:NAN1…	398:6397:32:9410:6974:6363:71586:6279:45944:6270:55:27:31939:30447:42274:463:48478:42797:71280:45292:42254:6468:71038:492:1905267:6401:30174:294:17183:6995:61393:8361:30010:6450:34427:19255:34463:43248:321:6614:1901917:6627:71035:6360:6368:1902626:44182:33554:727:495:16567:6511:71033:70481:31054:32543:973:34476:30490:465:6366:30466:6309:30163:9267:16573:30488:6267:6412:1990481:17198:154:494:71042…
463	maturation of LSU-rRNA from tricistronic rRNA transcript (SSU-rRNA, 5.8S rRNA, LSU-rRNA)	10 out of 181 genes, 5.5%	38 out of 13081 background genes, 0.3%	6.57e-06	0	C2_02540W_A:RRP15:C3_01560W_A:NSA2:HIT1:SPB1:CR_03940W_A:RPL7:CR_07750C_A:SSF1	27:463:492:30174:8361:34463:465:6267:747:31167:447:462:480:466:464:390:472
34641	cellular nitrogen compound metabolic process	80 out of 181 genes, 44.2%	1917 out of 13081 background genes, 14.7%	8.53e-06	0	RRS1:C1_02090C_A:TSR2:C1_03830C_A:ERB1:C1_06540C_A:C1_07960W_A:DIP2:C1_10620W_A:KRR1:GAR1:CDC54:DIM1:C2_02300W_A:UTP21:C2_02540W_A:KTI11:SMD2:CDC46:C2_06660W_A:C2_06790W_A:C2_06850W_A:RPA12:NOC4:MCM3:RRP8:UTP15:C2_08840W_A:RRP15:SOF1:BMS1:C3_01560W_A:C3_02350W_A:C3_02840W_A:NOP14:NOG1:NSA2:C3_07050W_A:C4_00330C_A:C4_00740W_A:HIT1:ZUO1:NAN1:C4_03740W_A:RRP42:C4_04520W_A:IMG2:NOP1:C4_06950W_A:C5_00…	398:6397:9410:6363:6279:45944:6270:55:27:31939:30447:42274:463:48478:35786:46654:42797:45292:42254:71038:19858:492:1905267:6401:30174:294:17183:6995:8361:30010:6450:34427:19255:34463:321:6614:42407:1901917:71035:6360:6368:1902626:727:495:71033:70481:31054:32543:973:34476:30490:465:6366:30466:6309:30163:9267:30488:6267:6412:1990481:154:494:71042:747:16578:18364:42273:51097:6271:36170:16075:45943:2…
480	endonucleolytic cleavage in 5'-ETS of tricistronic rRNA transcript (SSU-rRNA, 5.8S rRNA, LSU-rRNA)	9 out of 181 genes, 5.0%	31 out of 13081 background genes, 0.2%	1.4e-05	0	DIP2:C2_02540W_A:NOC4:BMS1:NOP14:C5_03920C_A:UTP18:PWP2:CR_09800C_A	30447:30010:34463:6614:9267:36170:920:447:71216:480:36180:464:472:35690
472	endonucleolytic cleavage to generate mature 5'-end of SSU-rRNA from (SSU-rRNA, 5.8S rRNA, LSU-rRNA)	9 out of 181 genes, 5.0%	32 out of 13081 background genes, 0.2%	1.91e-05	0	DIP2:C2_02540W_A:NOC4:BMS1:NOP14:C5_03920C_A:UTP18:PWP2:CR_09800C_A	30447:30010:34463:6614:9267:36170:920:447:71216:480:36180:464:472:35690
43628	ncRNA 3'-end processing	10 out of 181 genes, 5.5%	43 out of 13081 background genes, 0.3%	2.4e-05	0	C1_03830C_A:C1_06540C_A:C1_07960W_A:C1_10620W_A:C2_06660W_A:C4_03740W_A:RRP42:C4_04520W_A:NOP1:CR_02550C_A	71038:30010:34427:1901917:71035:495:71033:70481:31054:973:34476:1990481:494:71042:16075:31167:71028:71039:31120:71051:467:31118:51211:71049:34475:8033:32211:1990258:6897
43170	macromolecule metabolic process	92 out of 181 genes, 50.8%	2403 out of 13081 background genes, 18.4%	2.48e-05	0	RRS1:C1_01950C_A:C1_02090C_A:TSR2:SKO1:C1_03830C_A:ERB1:C1_06540C_A:C1_07960W_A:DIP2:C1_10620W_A:KRR1:GAR1:CDC54:DIM1:C1_14160W_A:C2_01060C_A:C2_01320W_A:C2_02300W_A:UTP21:C2_02540W_A:KTI11:C2_05840W_A:SMD2:CDC46:C2_06660W_A:C2_06790W_A:C2_06850W_A:RPA12:NOC4:MCM3:RRP8:UTP15:C2_08840W_A:RRP15:SOF1:BMS1:C3_01560W_A:C3_02350W_A:C3_02840W_A:NOP14:SKN1:NOG1:NSA2:C3_07050W_A:C4_00740W_A:HIT1:ZUO1:NAN1…	398:6397:32:9410:6974:6363:71586:6279:45944:6270:55:27:31939:30447:42274:463:48478:42797:71280:45292:42254:6468:71038:492:1905267:6401:30174:294:17183:6995:61393:8361:30010:6450:34427:19255:34463:43248:321:6614:1901917:6627:71035:6360:6368:1902626:44182:33554:727:495:16567:6511:71033:70481:31054:32543:973:34476:30490:465:6366:30466:6309:30163:9267:16573:30488:6267:6412:1990481:17198:154:494:71042…
467	exonucleolytic trimming to generate mature 3'-end of 5.8S rRNA from tricistronic rRNA transcript (SSU-rRNA, 5.8S rRNA, LSU-rRNA)	7 out of 181 genes, 3.9%	17 out of 13081 background genes, 0.1%	3.32e-05	0	C1_03830C_A:C1_06540C_A:C1_07960W_A:C2_06660W_A:C4_03740W_A:RRP42:CR_02550C_A	71038:34427:1901917:71035:71033:70481:31054:973:34476:71042:16075:71028:71039:71051:467:71049:34475
71029	nuclear ncRNA surveillance	7 out of 181 genes, 3.9%	18 out of 13081 background genes, 0.1%	5.32e-05	0	C1_03830C_A:C1_06540C_A:C1_07960W_A:C2_06660W_A:C4_03740W_A:RRP42:CR_02550C_A	71038:34427:1901917:71035:71033:70481:31054:973:34476:71042:16075:71028:71039:71051:467:71049:34475
71046	nuclear polyadenylation-dependent ncRNA catabolic process	7 out of 181 genes, 3.9%	18 out of 13081 background genes, 0.1%	5.32e-05	0	C1_03830C_A:C1_06540C_A:C1_07960W_A:C2_06660W_A:C4_03740W_A:RRP42:CR_02550C_A	71038:34427:1901917:71035:71033:70481:31054:973:34476:71042:16075:71028:71039:71051:467:71049:34475
9451	RNA modification	14 out of 181 genes, 7.7%	103 out of 13081 background genes, 0.8%	6.71e-05	0	C1_10620W_A:GAR1:DIM1:KTI11:RRP8:C2_08840W_A:NOP1:C4_06950W_A:SPB1:C7_02340C_A:NCS2:CR_04110W_A:CR_04240C_A:NOP10	463:42254:17183:30010:495:30490:30488:1990481:154:494:18364:42273:2143:32447:31167:462:31120:70476:70317:31118:51211:470:469:1522:466:1904812:8033:2098:7124:1990258:1403:6897:35690:493
71027	nuclear RNA surveillance	8 out of 181 genes, 4.4%	27 out of 13081 background genes, 0.2%	7.22e-05	0	C1_03830C_A:C1_06540C_A:C1_07960W_A:C2_06660W_A:C3_07050W_A:C4_03740W_A:RRP42:CR_02550C_A	45944:71038:34427:1901917:71035:6368:71033:70481:31054:973:34476:71042:16578:16075:51568:71028:71039:71051:467:71049:34475:32880:16973:34729
43634	polyadenylation-dependent ncRNA catabolic process	7 out of 181 genes, 3.9%	19 out of 13081 background genes, 0.1%	8.26e-05	0	C1_03830C_A:C1_06540C_A:C1_07960W_A:C2_06660W_A:C4_03740W_A:RRP42:CR_02550C_A	71038:34427:1901917:71035:71033:70481:31054:973:34476:71042:16075:71028:71039:71051:467:71049:34475
71025	RNA surveillance	8 out of 181 genes, 4.4%	28 out of 13081 background genes, 0.2%	9.91e-05	0	C1_03830C_A:C1_06540C_A:C1_07960W_A:C2_06660W_A:C3_07050W_A:C4_03740W_A:RRP42:CR_02550C_A	45944:71038:34427:1901917:71035:6368:71033:70481:31054:973:34476:71042:16578:16075:51568:71028:71039:71051:467:71049:34475:32880:16973:34729
31125	rRNA 3'-end processing	7 out of 181 genes, 3.9%	20 out of 13081 background genes, 0.2%	0.00012	0	C1_03830C_A:C1_06540C_A:C1_07960W_A:C2_06660W_A:C4_03740W_A:RRP42:CR_02550C_A	71038:34427:1901917:71035:71033:70481:31054:973:34476:71042:16075:71028:71039:71051:467:71049:34475
43633	polyadenylation-dependent RNA catabolic process	7 out of 181 genes, 3.9%	20 out of 13081 background genes, 0.2%	0.00012	0	C1_03830C_A:C1_06540C_A:C1_07960W_A:C2_06660W_A:C4_03740W_A:RRP42:CR_02550C_A	71038:34427:1901917:71035:71033:70481:31054:973:34476:71042:16075:71028:71039:71051:467:71049:34475
16078	tRNA catabolic process	6 out of 181 genes, 3.3%	14 out of 13081 background genes, 0.1%	0.00023	0	C1_03830C_A:C1_06540C_A:C2_06660W_A:C4_03740W_A:RRP42:CR_02550C_A	71038:34427:71035:70481:31054:71042:16075:71028:71039:71051:467:71049:34475
71038	nuclear polyadenylation-dependent tRNA catabolic process	6 out of 181 genes, 3.3%	14 out of 13081 background genes, 0.1%	0.00023	0	C1_03830C_A:C1_06540C_A:C2_06660W_A:C4_03740W_A:RRP42:CR_02550C_A	71038:34427:71035:70481:31054:71042:16075:71028:71039:71051:467:71049:34475
6807	nitrogen compound metabolic process	82 out of 181 genes, 45.3%	2139 out of 13081 background genes, 16.4%	0.00027	0	RRS1:C1_02090C_A:TSR2:C1_03830C_A:ERB1:C1_06540C_A:C1_07960W_A:DIP2:C1_10620W_A:KRR1:GAR1:CDC54:DIM1:C2_02300W_A:UTP21:C2_02540W_A:KTI11:SMD2:CDC46:C2_06660W_A:C2_06790W_A:C2_06850W_A:RPA12:NOC4:MCM3:RRP8:UTP15:C2_08840W_A:RRP15:SOF1:BMS1:C3_01560W_A:C3_02350W_A:C3_02840W_A:NOP14:NOG1:NSA2:C3_07050W_A:C4_00330C_A:C4_00740W_A:HIT1:ZUO1:NAN1:C4_03740W_A:RRP42:C4_04520W_A:IMG2:LYS1:NOP1:C4_06950W_A:…	398:6397:9410:6363:6279:45944:6270:55:27:31939:30447:42274:463:48478:35786:46654:42797:45292:42254:71038:19858:492:1905267:6401:30174:294:17183:6995:10133:8361:30010:6450:34427:19255:34463:321:6614:42407:1901917:71035:6360:6368:1902626:727:495:71033:70481:31054:32543:973:34476:30490:465:6366:30466:6309:30163:9267:30488:6267:6412:1990481:154:494:71042:747:16578:18364:42273:51097:6271:36170:16075:4…
43144	snoRNA processing	8 out of 181 genes, 4.4%	33 out of 13081 background genes, 0.3%	0.00039	0	C1_07960W_A:C1_10620W_A:C3_02840W_A:C4_00740W_A:C4_03740W_A:C4_04520W_A:NOP1:CR_02550C_A	71038:1905267:294:30010:34427:1901917:71035:495:71033:31054:973:34476:1990481:494:31167:71028:71039:447:31120:467:71051:31118:51211:71049:34475:8033:32211:6364:1990258:34965:6897
71035	nuclear polyadenylation-dependent rRNA catabolic process	6 out of 181 genes, 3.3%	16 out of 13081 background genes, 0.1%	0.00059	0	C1_03830C_A:C1_06540C_A:C1_07960W_A:C2_06660W_A:C4_03740W_A:CR_02550C_A	71038:34427:1901917:71035:71033:70481:31054:973:34476:71042:71028:71039:71051:467:71049:34475
16073	snRNA metabolic process	7 out of 181 genes, 3.9%	26 out of 13081 background genes, 0.2%	0.00093	0	C1_07960W_A:C1_10620W_A:GAR1:C4_03740W_A:CR_02550C_A:CR_04110W_A:NOP10	42254:71038:30010:34427:1901917:71035:495:71033:31054:973:34476:1990481:71028:71039:31120:467:71051:31118:51211:71049:469:34475:6897:35690:493
16075	rRNA catabolic process	7 out of 181 genes, 3.9%	27 out of 13081 background genes, 0.2%	0.00123	0	C1_03830C_A:C1_06540C_A:C1_07960W_A:C2_06660W_A:C4_03740W_A:RRP42:CR_02550C_A	71038:34427:1901917:71035:71033:70481:31054:973:34476:71042:16075:71028:71039:71051:467:71049:34475
16074	snoRNA metabolic process	8 out of 181 genes, 4.4%	39 out of 13081 background genes, 0.3%	0.00156	0	C1_07960W_A:C1_10620W_A:C3_02840W_A:C4_00740W_A:C4_03740W_A:C4_04520W_A:NOP1:CR_02550C_A	71038:1905267:294:30010:34427:1901917:71035:495:71033:31054:973:34476:1990481:494:31167:71028:71039:447:31120:467:71051:31118:51211:71049:34475:8033:32211:6364:1990258:34965:6897
31126	snoRNA 3'-end processing	6 out of 181 genes, 3.3%	20 out of 13081 background genes, 0.2%	0.00265	0	C1_07960W_A:C1_10620W_A:C4_03740W_A:C4_04520W_A:NOP1:CR_02550C_A	71038:30010:34427:1901917:71035:495:71033:31054:973:34476:1990481:494:31167:71028:71039:31120:467:71051:31118:51211:71049:34475:8033:32211:1990258:6897
31123	RNA 3'-end processing	10 out of 181 genes, 5.5%	71 out of 13081 background genes, 0.5%	0.00325	0	C1_03830C_A:C1_06540C_A:C1_07960W_A:C1_10620W_A:C2_06660W_A:C4_03740W_A:RRP42:C4_04520W_A:NOP1:CR_02550C_A	71038:30010:34427:1901917:71035:495:71033:70481:31054:973:34476:1990481:494:71042:16075:31167:71028:71039:31120:71051:467:31118:51211:71049:34475:8033:32211:1990258:6897
34661	ncRNA catabolic process	7 out of 181 genes, 3.9%	31 out of 13081 background genes, 0.2%	0.00338	0	C1_03830C_A:C1_06540C_A:C1_07960W_A:C2_06660W_A:C4_03740W_A:RRP42:CR_02550C_A	71038:34427:1901917:71035:71033:70481:31054:973:34476:71042:16075:71028:71039:71051:467:71049:34475
1522	pseudouridine synthesis	5 out of 181 genes, 2.8%	14 out of 13081 background genes, 0.1%	0.00656	0	C1_10620W_A:GAR1:C4_06950W_A:CR_04110W_A:NOP10	42254:30010:495:1990481:154:31120:31118:51211:469:1522:6897:35690:493
31120	snRNA pseudouridine synthesis	4 out of 181 genes, 2.2%	8 out of 13081 background genes, 0.1%	0.01087	0	C1_10620W_A:GAR1:CR_04110W_A:NOP10	42254:30010:495:1990481:31120:31118:51211:469:6897:35690:493
40031	snRNA modification	4 out of 181 genes, 2.2%	8 out of 13081 background genes, 0.1%	0.01087	0	C1_10620W_A:GAR1:CR_04110W_A:NOP10	42254:30010:495:1990481:31120:31118:51211:469:6897:35690:493
6399	tRNA metabolic process	15 out of 181 genes, 8.3%	181 out of 13081 background genes, 1.4%	0.01338	0	C1_03830C_A:C1_06540C_A:KTI11:C2_06660W_A:C2_08840W_A:C3_02840W_A:C4_00740W_A:C4_03740W_A:RRP42:NOP1:RPO26:C7_02340C_A:RPC19:CR_02550C_A:NCS2	42797:71038:1905267:294:17183:34427:71035:6360:70481:31054:30490:6366:30488:494:71042:18364:16075:2143:32447:31167:71028:71039:447:71051:467:70476:71049:470:34475:8033:2098:7124:6364:1990258:1403:34965:42493
51097	negative regulation of helicase activity	4 out of 181 genes, 2.2%	9 out of 13081 background genes, 0.1%	0.0192	0	CDC54:CDC46:MCM3:MCM2	6279:6270:31939:48478:30174:727:30466:6267:51097:6271:6348:6343:1902450:6268:1902975
33967	box C/D snoRNA metabolic process	4 out of 181 genes, 2.2%	10 out of 13081 background genes, 0.1%	0.03141	0	C3_02840W_A:C4_00740W_A:C4_04520W_A:NOP1	1905267:294:494:31167:447:8033:32211:6364:1990258:34965
34963	box C/D snoRNA processing	4 out of 181 genes, 2.2%	10 out of 13081 background genes, 0.1%	0.03141	0	C3_02840W_A:C4_00740W_A:C4_04520W_A:NOP1	1905267:294:494:31167:447:8033:32211:6364:1990258:34965
33750	ribosome localization	7 out of 181 genes, 3.9%	45 out of 13081 background genes, 0.3%	0.04407	0.0003	RRS1:ARX1:C2_06850W_A:NOG1:ZUO1:ECM1:C7_04140C_A	55:42274:6450:1902626:34599:42273:9987:447:462:6970:56:54:42255:32880:6452:6364:35690
33753	establishment of ribosome localization	7 out of 181 genes, 3.9%	45 out of 13081 background genes, 0.3%	0.04407	0.0003	RRS1:ARX1:C2_06850W_A:NOG1:ZUO1:ECM1:C7_04140C_A	55:42274:6450:1902626:34599:42273:9987:447:462:6970:56:54:42255:32880:6452:6364:35690
54	ribosomal subunit export from nucleus	7 out of 181 genes, 3.9%	45 out of 13081 background genes, 0.3%	0.04407	0.0003	RRS1:ARX1:C2_06850W_A:NOG1:ZUO1:ECM1:C7_04140C_A	55:42274:6450:1902626:34599:42273:9987:447:462:6970:56:54:42255:32880:6452:6364:35690
1902299	pre-replicative complex assembly involved in cell cycle DNA replication	5 out of 181 genes, 2.8%	20 out of 13081 background genes, 0.2%	0.04524	0.0003	CDC54:CDC46:MCM3:MCM2:CR_03940W_A	6279:6270:27:31939:463:48478:30174:727:30466:6267:51097:6271:6348:6343:1902450:6268:1902975
36388	pre-replicative complex assembly	5 out of 181 genes, 2.8%	20 out of 13081 background genes, 0.2%	0.04524	0.0003	CDC54:CDC46:MCM3:MCM2:CR_03940W_A	6279:6270:27:31939:463:48478:30174:727:30466:6267:51097:6271:6348:6343:1902450:6268:1902975
6267	pre-replicative complex assembly involved in nuclear cell cycle DNA replication	5 out of 181 genes, 2.8%	20 out of 13081 background genes, 0.2%	0.04524	0.0003	CDC54:CDC46:MCM3:MCM2:CR_03940W_A	6279:6270:27:31939:463:48478:30174:727:30466:6267:51097:6271:6348:6343:1902450:6268:1902975
51095	regulation of helicase activity	4 out of 181 genes, 2.2%	11 out of 13081 background genes, 0.1%	0.04845	0.0003	CDC54:CDC46:MCM3:MCM2	6279:6270:31939:48478:30174:727:30466:6267:51097:6271:6348:6343:1902450:6268:1902975
51346	negative regulation of hydrolase activity	5 out of 181 genes, 2.8%	21 out of 13081 background genes, 0.2%	0.05824	0.0003	C1_04360C_A:CDC54:CDC46:MCM3:MCM2	6279:6270:31939:48478:32780:30174:45980:727:30466:6267:51097:6271:6348:6343:1902450:6268:1902975
31167	rRNA methylation	4 out of 181 genes, 2.2%	12 out of 13081 background genes, 0.1%	0.07132	0.0003	RRP8:C2_08840W_A:NOP1:SPB1	463:30490:30488:494:18364:42273:31167:70476:470:466:8033:1990258
34622	cellular macromolecular complex assembly	23 out of 181 genes, 12.7%	421 out of 13081 background genes, 3.2%	0.08302	0.0003	RRS1:C1_06640C_A:C1_06840C_A:C1_09020W_A:CSI2:CDC54:C2_01320W_A:C2_01720C_A:SAM37:C2_02540W_A:CDC46:C2_06790W_A:MCM3:MAK21:NOG1:RLP24:HIT1:C4_05860W_A:MED11:MCM2:CR_03940W_A:CR_04110W_A:SSF1	9410:6279:45944:6270:55:31939:30447:27:463:48478:45292:42254:492:15914:30174:8361:34463:43248:1902626:727:6511:30466:9267:6267:747:42273:51097:6271:36170:9405:51123:32968:447:6348:70096:71852:71216:55114:7021:480:31120:30437:54:32981:6457:36180:71629:6343:42255:7005:1902450:6268:1902975:6364:245:122:464:6626:45040:472:33617:35690:493
71826	ribonucleoprotein complex subunit organization	12 out of 181 genes, 6.6%	145 out of 13081 background genes, 1.1%	0.08969	0.0005	RRS1:CSI2:C2_02540W_A:C2_06790W_A:C3_01560W_A:MAK21:NOG1:RLP24:HIT1:CR_03940W_A:CR_04110W_A:SSF1	9410:55:30447:27:463:45292:42254:492:30174:8361:34463:1902626:9267:6267:747:42273:36170:447:462:71216:480:31120:54:36180:42255:466:6364:245:464:390:472:35690:493
6401	RNA catabolic process	11 out of 181 genes, 6.1%	124 out of 13081 background genes, 0.9%	0.09118	0.0005	C1_03830C_A:C1_06540C_A:C1_07960W_A:C2_06660W_A:C3_02840W_A:C3_07050W_A:C4_00740W_A:C4_03740W_A:RRP42:C5_00280C_A:CR_02550C_A	45944:71038:1905267:6401:294:6995:34427:1901917:71035:6368:71033:70481:31054:973:34476:6309:71042:16578:16075:51568:71028:71039:447:6310:71051:467:71049:34475:32880:16973:34729:8033:6364:34965

## Sheet: 6. GO process - caspo DOWN
GO components of all genes with decreased RNA PolII occupancy in cas5∆/cas5∆ mutant in comparison to the wild type strain under caspofungin treatment condition.
GOID	Go term	Cluster frequency	Background frequency	Corrected P-value	False discovery rate	Gene(s) annotated to the term	Directly Annotated GOID List
71852	fungal-type cell wall organization or biogenesis	19 out of 147 genes, 12.9%	242 out of 13081 background genes, 1.9%	0.00012	0	PHR2:GSC1:HAC1:DPM1:KAR2:PMT4:PMI1:UTR2:KRE9:WSC1:PMT2:SRB1:CRH11:C4_04560C_A:SUN41:WSC2:PMT1:EFG1:PGA13	45861:43936:32:920:6037:1410:36178:30448:6990:1900439:1900445:45944:70887:44114:2000220:97316:30447:2000222:30433:31589:9272:6078:1900231:71852:70880:6486:16477:71216:1900241:71712:902:30476:1900442:48869:7163:71467:6488:742:42546:6487:1900101:36187:6950:1900436:31505:199:10674:36166:36244:44406:44117:1900430:1900239:6457:44182:33554:36180:7155:35269:20012:44409:1900461:10811:31204:6493:6355:6075…
30447	filamentous growth	33 out of 147 genes, 22.4%	674 out of 13081 background genes, 5.2%	0.00027	0	PHR2:SHA3:BRG1:HAC1:FGR6-3:NDT80:STP4:PMT4:KIS1:PMI1:FGR6-4:UTR2:KRE9:WSC1:AAF1:PMT2:FGR6-10:CZF1:CDC11:HSL1:MIG1:DES1:CPH2:SUN41:C7_00120W_A:FGR6-1:PMT1:CLB4:CHT1:YHB1:EFG1:PGA13:RTA4	45861:42992:43936:32:1410:36178:1900439:1900445:51726:1900443:45944:30011:97316:921:30447:31589:9272:97271:71280:40009:6486:16477:71712:6468:71467:34605:1900101:43254:1900436:199:15976:46210:71285:45892:1900189:10674:1300:86:36166:36244:15758:44406:1900239:44182:33554:6033:7155:35269:44409:1900461:15671:10811:1902935:6355:1901673:10696:43689:44879:71970:34599:60240:8105:9267:2000221:44011:79:6025…
40007	growth	33 out of 147 genes, 22.4%	693 out of 13081 background genes, 5.3%	0.00052	0	PHR2:SHA3:BRG1:HAC1:FGR6-3:NDT80:STP4:PMT4:KIS1:PMI1:FGR6-4:UTR2:KRE9:WSC1:AAF1:PMT2:FGR6-10:CZF1:CDC11:HSL1:MIG1:DES1:CPH2:SUN41:C7_00120W_A:FGR6-1:PMT1:CLB4:CHT1:YHB1:EFG1:PGA13:RTA4	45861:42992:43936:32:1410:36178:1900439:1900445:51726:1900443:45944:30011:97316:921:30447:31589:9272:97271:71280:40009:6486:16477:71712:6468:71467:34605:1900101:43254:1900436:199:15976:46210:71285:45892:1900189:10674:1300:86:36166:36244:15758:44406:1900239:44182:33554:6033:7155:35269:44409:1900461:15671:10811:1902935:6355:1901673:10696:43689:44879:71970:34599:60240:8105:9267:2000221:44011:79:6025…
71554	cell wall organization or biogenesis	19 out of 147 genes, 12.9%	268 out of 13081 background genes, 2.0%	0.00058	0	PHR2:GSC1:HAC1:DPM1:KAR2:PMT4:PMI1:UTR2:KRE9:WSC1:PMT2:SRB1:CRH11:C4_04560C_A:SUN41:WSC2:PMT1:EFG1:PGA13	45861:43936:32:1410:36178:1900439:1900445:45944:97316:30447:31589:9272:6486:16477:71712:30476:71467:742:1900101:1900436:199:10674:36166:36244:44406:1900239:44182:33554:7155:35269:44409:1900461:10811:31204:6355:43689:71970:7266:9267:6986:44011:60257:6342:6616:70787:97237:70783:36171:36170:44407:9405:32527:920:6037:30448:6990:70887:44114:2000220:2000222:30433:6078:1900231:71852:70880:71216:1900241:…
31505	fungal-type cell wall organization	14 out of 147 genes, 9.5%	177 out of 13081 background genes, 1.4%	0.00511	0	PHR2:GSC1:HAC1:PMT4:PMI1:UTR2:KRE9:PMT2:CRH11:C4_04560C_A:SUN41:WSC2:PMT1:PGA13	45861:32:36178:30447:31589:9272:6486:71712:30476:71467:1900101:10674:36244:44406:44182:33554:35269:6355:71970:7266:9267:44011:60257:6342:70787:97237:70783:36170:44407:9405:32527:920:6037:30448:6990:6078:71216:7163:42546:31505:44117:36180:6493:6075:9298:9408:44845:35690
45229	external encapsulating structure organization	14 out of 147 genes, 9.5%	178 out of 13081 background genes, 1.4%	0.00545	0	PHR2:GSC1:HAC1:PMT4:PMI1:UTR2:KRE9:PMT2:CRH11:C4_04560C_A:SUN41:WSC2:PMT1:PGA13	45861:32:36178:30447:31589:9272:6486:71712:30476:71467:1900101:10674:36244:44406:44182:33554:35269:6355:71970:7266:9267:44011:60257:6342:70787:97237:70783:36170:44407:9405:32527:920:6037:30448:6990:6078:71216:7163:42546:31505:44117:36180:6493:6075:9298:9408:44845:35690
71555	cell wall organization	14 out of 147 genes, 9.5%	178 out of 13081 background genes, 1.4%	0.00545	0	PHR2:GSC1:HAC1:PMT4:PMI1:UTR2:KRE9:PMT2:CRH11:C4_04560C_A:SUN41:WSC2:PMT1:PGA13	45861:32:36178:30447:31589:9272:6486:71712:30476:71467:1900101:10674:36244:44406:44182:33554:35269:6355:71970:7266:9267:44011:60257:6342:70787:97237:70783:36170:44407:9405:32527:920:6037:30448:6990:6078:71216:7163:42546:31505:44117:36180:6493:6075:9298:9408:44845:35690
51274	beta-glucan biosynthetic process	5 out of 147 genes, 3.4%	21 out of 13081 background genes, 0.2%	0.02746	0	PHR2:GSC1:KAR2:KRE9:KRE1	30447:30476:71467:742:31204:71970:6986:6342:6616:97237:9405:30433:6078:70880:42546:31505:6457:36180:6075:35690
44182	filamentous growth of a population of unicellular organisms	22 out of 147 genes, 15.0%	465 out of 13081 background genes, 3.6%	0.05403	0.0044	SHA3:BRG1:FGR6-3:NDT80:PMT4:KIS1:FGR6-4:UTR2:KRE9:PMT2:FGR6-10:CZF1:CDC11:HSL1:CPH2:SUN41:PMT1:CHT1:YHB1:EFG1:PGA13:RTA4	45861:42992:32:1410:36178:1900439:1900445:51726:1900443:45944:30011:97316:921:30447:31589:97271:71280:16477:71712:6468:34605:1900101:43254:1900436:46210:71285:1900189:86:36166:36244:15758:44406:1900239:44182:6033:7155:35269:44409:1900461:15671:10811:1902935:6355:43689:44879:34599:60240:8105:9267:2000221:44011:60257:71218:9636:70787:36177:10515:97237:70783:6109:36171:1900233:36170:44407:9405:44257…
5976	polysaccharide metabolic process	8 out of 147 genes, 5.4%	75 out of 13081 background genes, 0.6%	0.06279	0.004	PHR2:GSC1:KAR2:UTR2:KRE9:CRH11:GAC1:KRE1	30447:30476:71467:742:44406:7094:5977:31204:71970:6986:6342:6616:97237:70783:9405:6037:30433:6078:70880:42546:31505:6457:36180:7126:6075:9408:35690
44011	single-species biofilm formation on inanimate substrate	10 out of 147 genes, 6.8%	119 out of 13081 background genes, 0.9%	0.06526	0.0036	BRG1:NDT80:PMT4:PMT2:CZF1:SUN41:PMT1:ADH5:CRZ2:EFG1	45861:32:1410:36178:1900439:1900445:1900443:45944:71468:97316:30447:31589:71280:70417:16477:71712:1900101:1900436:71285:1900189:36166:36244:44406:1900239:44182:7155:35269:44409:1900461:10811:6355:43689:34599:9267:44011:70787:36177:36171:1900233:36170:44407:9405:32527:1900743:920:30448:70887:44114:2000220:9372:2000222:1900231:71852:55114:71216:1900241:902:1900442:48869:7163:36187:31505:44117:19004…
51703	intraspecies interaction between organisms	10 out of 147 genes, 6.8%	119 out of 13081 background genes, 0.9%	0.06526	0.0033	BRG1:NDT80:PMT4:PMT2:CZF1:SUN41:PMT1:ADH5:CRZ2:EFG1	45861:32:1410:36178:1900439:1900445:1900443:45944:71468:97316:30447:31589:71280:70417:16477:71712:1900101:1900436:71285:1900189:36166:36244:44406:1900239:44182:7155:35269:44409:1900461:10811:6355:43689:34599:9267:44011:70787:36177:36171:1900233:36170:44407:9405:32527:1900743:920:30448:70887:44114:2000220:9372:2000222:1900231:71852:55114:71216:1900241:902:1900442:48869:7163:36187:31505:44117:19004…
51273	beta-glucan metabolic process	5 out of 147 genes, 3.4%	25 out of 13081 background genes, 0.2%	0.06737	0.0046	PHR2:GSC1:KAR2:KRE9:KRE1	30447:30476:71467:742:31204:71970:6986:6342:6616:97237:9405:30433:6078:70880:42546:31505:6457:36180:6075:35690
9250	glucan biosynthetic process	5 out of 147 genes, 3.4%	27 out of 13081 background genes, 0.2%	0.09922	0.0043	PHR2:GSC1:KAR2:KRE9:KRE1	30447:30476:71467:742:31204:71970:6986:6342:6616:97237:9405:30433:6078:70880:42546:31505:6457:36180:6075:35690

## Sheet: 7. KEGG
KEGG analysis of differentially bound genes in the cas5∆/cas5∆ mutant in comparison to the wild type strain under basal and caspofungin treatment conditions.
KEGG pathways	genes with decreased RNA PolII occupancy unique to basal condition in the cas5∆/cas5∆ mutant vs WT (i.e. not under caspofungin treatment)	genes with increased RNA PolII occupancy unique to basal condition in the cas5∆/cas5∆ mutant vs WT (i.e. not under caspofungin treatment)	genes with decreased RNA PolII occupancy common to both basal and caspofungin treatment conditions in the cas5∆/cas5∆ mutant vs WT	genes with increased RNA PolII occupancy common to both basal and caspofungin treatment conditions in the cas5∆/cas5∆ mutant vs WT	genes with decreased RNA PolII occupancy unique to caspofungin treatment condition in the cas5∆/cas5∆ mutant vs WT (i.e. not under normal conditions)	genes with increased RNA PolII occupancy unique to caspofungin treatment condition in the cas5∆/cas5∆ mutant vs WT (i.e. not under normal conditions)		Total		Specific to Normal conditions [INCREASED + DECREASED]	Common [INCREASED + DECREASED]	Specific to caspofungin treatment [INCREASED + DECREASED]
Metabolic pathways	16	36	22	32	15	7		128		52	54	22
Biosynthesis of antibiotics	7	19	17	17	4	2		66		26	34	6
Biosynthesis of secondary metabolites	11	17	18	21	8	1		76		28	39	9
Biosynthesis of amino acids	1	16	11	10	1	1		40		17	21	2
Oxidative phosphorylation	0	13	0	2	0	1		16		13	2	1
2-Oxocarboxylic acid metabolism	0	10	0	3	0	0		13		10	3	0
Carbon metabolism	5	7	13	8	2	0		35		12	21	2
Citrate cycle (TCA cycle)	1	6	0	0	0	0		7		7	0	0
Peroxisome	5	0	1	0	0	0		6		5	1	0
Longevity regulating pathway	3	1	3	0	0	0		7		4	3	0
Valine, leucine and isoleucine biosynthesis	1	3	0	3	0	0		7		4	3	0
Cysteine and methionine metabolism	1	3	0	4	0	0		8		4	4	0
Lysine biosynthesis	0	4	0	0	0	1		5		4	0	1
Phenylalanine, tyrosine and tryptophan biosynthesis	0	3	0	2	0	0		5		3	2	0
Glyoxylate and dicarboxylate metabolism	1	2	0	3	0	0		6		3	3	0
Purine metabolism	2	4	1	11	0	3		21		6	12	3
Pyruvate metabolism	2	2	1	2	1	0		8		4	3	1
Starch and sucrose metabolism	5	0	4	0	2	0		11		5	4	2
Pantothenate and CoA biosynthesis	0	3	0	1	0	0		4		3	1	0
Mannose type O-glycan biosynthesis	0	0	0	0	3	0		3		0	0	3
Mitophagy	0	0	0	0	2	1		3		0	0	3
Other types of O-glycan biosynthesis	0	0	0	0	3	0		3		0	0	3
DNA replication	1	0	0	0	1	4		6		1	0	5
Meiosis	3	0	3	1	3	4		14		3	4	7
Cell cycle	3	0	4	1	3	4		15		3	5	7
RNA degradation	0	0	3	0	0	5		8		0	3	5
Ribosome biogenesis in eukaryotes	0	4	0	11	0	18		33		4	11	18
Glycerophospholipid metabolism	4	0	0	0	2	0		6		4	0	2
Glycine, serine and threonine metabolism	1	2	2	6	1	0		12		3	8	1
Endocytosis	0	2	1	1	0	0		4		2	2	0
Valine, leucine and isoleucine degradation	1	1	0	1	0	0		3		2	1	0
Butanoate metabolism	1	1	0	0	0	0		2		2	0	0
Alanine, aspartate and glutamate metabolism	1	0	0	6	0	0		7		1	6	0
One carbon pool by folate	0	1	0	4	0	0		5		1	4	0
Methane metabolism	1	1	7	3	1	0		13		2	10	1
Pyrimidine metabolism	2	2	0	2	0	3		9		4	2	3
Arginine and proline metabolism	0	1	2	1	0	0		4		1	3	0
Biosynthesis of unsaturated fatty acids	1	1	0	0	0	1		3		2	0	1
Fatty acid metabolism	1	1	0	0	0	1		3		2	0	1
Nicotinate and nicotinamide metabolism	2	0	0	0	1	0		3		2	0	1
Histidine metabolism	0	1	0	1	0	0		2		1	1	0
ABC transporters	1	0	0	0	0	0		1		1	0	0
alpha-Linolenic acid metabolism	1	0	0	0	0	0		1		1	0	0
Base excision repair	0	1	0	0	0	0		1		1	0	0
beta-Alanine metabolism	1	0	0	0	0	0		1		1	0	0
C5-Branched dibasic acid metabolism	0	1	0	0	0	0		1		1	0	0
Carbapenem biosynthesis	0	1	0	0	0	0		1		1	0	0
Hippo signaling pathway	1	0	0	0	0	0		1		1	0	0
Homologous recombination	1	0	0	0	0	0		1		1	0	0
Lipoic acid metabolism	0	1	0	0	0	0		1		1	0	0
Monobactam biosynthesis	0	1	0	0	0	0		1		1	0	0
Sulfur metabolism	1	0	0	0	0	0		1		1	0	0
Taurine and hypotaurine metabolism	1	0	0	0	0	0		1		1	0	0
Tryptophan metabolism	1	0	0	0	0	0		1		1	0	0
Pentose phosphate pathway	0	0	4	2	0	0		6		0	6	0
Galactose metabolism	1	0	3	0	1	0		5		1	3	1
MAPK signaling pathway	2	2	1	1	4	0		10		4	2	4
Fatty acid degradation	1	0	2	0	1	0		4		1	2	1
Sphingolipid metabolism	2	0	0	0	2	0		4		2	0	2
Arginine biosynthesis	0	0	1	2	0	0		3		0	3	0
Vitamin B6 metabolism	0	0	0	3	0	0		3		0	3	0
Porphyrin and chlorophyll metabolism	1	0	0	0	1	0		2		1	0	1
Propanoate metabolism	1	0	0	0	1	0		2		1	0	1
Steroid biosynthesis	1	0	0	0	1	0		2		1	0	1
Sulfur relay system	1	0	0	0	0	1		2		1	0	1
Cyanoamino acid metabolism	0	0	0	1	0	0		1		0	1	0
Glutathione metabolism	0	0	0	1	0	0		1		0	1	0
Inositol phosphate metabolism	0	0	1	0	0	0		1		0	1	0
Phagosome	0	0	1	0	0	0		1		0	1	0
Phenylalanine metabolism	0	0	0	1	0	0		1		0	1	0
Glycolysis / Gluconeogenesis	3	0	15	0	4	0		22		3	15	4
RNA transport	0	1	0	2	0	2		5		1	2	2
Spliceosome	0	2	1	2	0	3		8		2	3	3
N-Glycan biosynthesis	1	0	0	1	1	1		4		1	1	2
Tyrosine metabolism	0	0	2	1	1	0		4		0	3	1
Mismatch repair	1	0	0	0	2	0		3		1	0	2
Nitrogen metabolism	0	0	0	1	0	1		2		0	1	1
Various types of N-glycan biosynthesis	0	0	0	1	0	1		2		0	1	1
Folate biosynthesis	0	0	0	0	0	1		1		0	0	1
Pentose and glucuronate interconversions	0	0	0	0	1	0		1		0	0	1
Proteasome	0	0	0	0	0	1		1		0	0	1
SNARE interactions in vesicular transport	0	0	0	0	1	0		1		0	0	1
Terpenoid backbone biosynthesis	0	0	0	0	0	1		1		0	0	1
Ubiquitin mediated proteolysis	0	0	0	0	0	1		1		0	0	1
Ribosome	0	1	0	1	0	3		5		1	1	3
RNA polymerase	0	1	0	1	0	3		5		1	1	3
Fructose and mannose metabolism	2	0	6	0	4	0		12		2	6	4
Amino sugar and nucleotide sugar metabolism	1	1	3	0	4	0		9		2	3	4
Protein processing in endoplasmic reticulum	0	2	2	1	3	1		9		2	3	4
Glycerolipid metabolism	0	0	2	0	2	0		4		0	2	2
Protein export	0	0	1	0	1	1		3		0	1	2
Lysine degradation	0	0	0	0	1	1		2		0	0	2
