# Supplementary material for: The Candida albicans transcription factor Cas5 couples stress responses, drug resistance and cell cycle regulation
Source: Nat Commun. 2017 Sep 11;8:499. doi: 10.1038/s41467-017-00547-y (PMC5593949; doi:10.1038/s41467-017-00547-y)
Supplement: Supplementary file 6 — Supplementary Data 5 [file 41467_2017_547_MOESM6_ESM.xlsx]

## Sheet: Target overlaps
Supplementary Data 5: Common and unique differentially bound genes between the comparisons of the cas5∆/cas5∆ mutant to the wild type strain and of wild type strain in the presence and absence of caspofungin treatment.
The ORF numbers under gene names are derived from Genome Assembly 21.
Genes with increased RNA PolII occupancy in both cas5∆/cas5∆ mutant and caspofungin-treated WT				Genes with increased RNA PolII occupancy in cas5∆/cas5∆ mutant, but decreased RNA PolII occupancy in caspofungin-treated WT				Genes with decreased RNA PolII occupancy in cas5∆/cas5∆ mutant, but increased RNA PolII occupancy in caspofungin-treated WT				Genes with decreased RNA PolII occupancy in both cas5∆/cas5∆ mutant and caspofungin-treated WT				Genes with increased RNA PolII occupancy only in the cas5∆/cas5∆ mutant				Genes with decreased RNA PolII occupancy only in the cas5∆/cas5∆ mutant				Genes with increased RNA PolII occupancy only in the caspofungin-treated WT				Genes with decreased RNA PolII occupancy only in the caspofungin-treated WT
total	genes			total	genes			total	genes			total	genes			total	genes			total	genes			total	genes			total	genes
21	orf19.4376			8	TPO3			23	orf19.6840			131	EBP1			300	SSA2			121	orf19.4380.1			250	orf19.86			113	orf19.3679
	MXR1				ADE13				orf19.675				orf19.4211				CHT2				ADH1				orf19.951				orf19.3448
	orf19.1765				GDH3				STF2				ADAEC				KAR4				orf19.398				RTA4				orf19.6795
	orf19.1953				SNO1				RTA3				HGT8				orf19.1404				YVC1				orf19.6527				orf19.3447
	orf19.7296				CHA1				DDR48				TDH3				NOP4				ADH2				SAC6				ECM17
	orf19.3501				SAM4				orf19.7214				PHO112				orf19.1250				orf19.3644				CZF1				orf19.1522
	HBR3				ARO3				PCL1				GIT1				TRM2				orf19.35				FGR6-1				OPT9
	orf19.6660				ADE6				PGA6				RBT5				ARC40				KEX2				IRS4				orf19.7104
	orf19.1950								BMT4				ENG1				orf19.5262				RIM15				orf19.210				COI1
	PHR1								orf19.5518				orf19.1258				TIM9				MAF1				PGA1				BMT1
	AKR1								orf19.2959.1				PGA38				SNZ1				orf19.1246				MNN12				orf19.1287
	PTP3								CCN1				orf19.1150.1				SDH2				orf19.4390				PLC2				RCL1
	ACO1								MUM2				OSM2				orf19.2065				orf19.4824				orf19.4666				GAC1
	GAP6								PST3				orf19.6079				BUD21				SEC61				MCA1				orf19.1948
	YKE2								orf19.2204				HAP43				orf19.6418				orf19.4423				MOB2				APE3
	CRD2								CAS5				ACS1				ADE4				FOX2				ZCF39				orf19.4825
	ALS1								orf19.3461				FRP3				orf19.4921.1				CAT2				orf19.7458				AAT22
	FTR2								CSH1				CHT3				orf19.2782				orf19.5825.1				BMT6				RHD3
	orf19.5006.1								orf19.6117				HGT7				HAM1				PHO84				orf19.676				orf19.6741
	orf19.3087.2								orf19.3932				orf19.787				IMH3				PIR1				CHS3				ALP1
	BMT7								RCT1				HSP12				ZWF1				QDR1				FGR6-10				orf19.2237.1
									RHR2				POL93				orf19.6156				orf19.7519				HOS3				CDC46
									SWE1				WH11				orf19.3836				HHF22				HPA2				FAD2
													orf19.1240				NEP1				RNH35				orf19.7598				ERG11
													orf19.5755				NIP7				orf19.6177				DFG5				orf19.5019
													MET1				PGA57				RIM8				WSC2				orf19.6119
													orf19.2761				orf19.4507				AYR2				orf19.2769				PGA48
													orf19.1368				PTC8				orf19.2163				UTR2				CYK3
													AMN1				orf19.4513				orf19.6667				orf19.5869				orf19.334
													FGR41				orf19.2256				RAD57				orf19.7457				CFL1
													orf19.6951				orf19.3463				CDR1				orf19.6554				OPT1
													ALD5				orf19.7663				CTA2				FGR22				orf19.6537
													TPI1				orf19.4740				ECM4				orf19.1409.2				LYS1
													PLB4.5				orf19.5076.1				orf19.6113				PEX4				ERG251
													ERG3				orf19.3108				LAT1				orf19.7070				orf19.1114
													ZCF2				orf19.446.2				LIP8				orf19.7125				orf19.7100
													SOD3				HIS3				orf19.4531				orf19.3328				orf19.1964
													orf19.4216				GCV2				orf19.7166				orf19.916				orf19.6222.1
													PDR16				orf19.2406				orf19.6713				orf19.6090				DLD1
													PEX3				LSM6				GPH1				orf19.1658				STP1
													KIP2				PRO2				HHF1				ECM21				ARO8
													ASH1				HMX1				ALS3				orf19.4476				CDC6
													PRX1				CAM1				MSH2				CHS2				orf19.1893
													TRX2				HPT1				orf19.2132				DPM1				NMD5
													SUL2				orf19.3175				orf19.4532				GSC1				MCM2
													MSN4				orf19.7370				PCL2				orf19.3737				CDC5
													orf19.6008				GUA1				FGR29				FGR6-3				MAE1
													HGT6				COX6				orf19.3226				LAG1				orf19.7588
													PHO113				orf19.828				ENO1				CRH11				FLU1
													VTC3				orf19.2784				orf19.321				CRZ2				orf19.6983
													orf19.904				NDH51				orf19.7404				OPY2				NCE102
													orf19.4189				orf19.5064.1				orf19.1391				SMP2				orf19.909.1
													CDR4				STE50				TPK2				DDI1				orf19.6007
													TRY6				orf19.5589				CAR1				orf19.2887				orf19.3894
													orf19.3483				orf19.4167				SIM1				PGA23				orf19.5049
													orf19.787.1				URA5				GDE1				VPS27				MIM1
													ATO2				orf19.4066				RNR22				ATG15				orf19.7580
													AHP1				YMC1				orf19.2426				orf19.675.1				HOF1
													FTR1				orf19.4133				orf19.6737				SOD1				ZCF1
													RBE1				MEC3				ISN1				orf19.4596				MCM3
													orf19.5267				BAT22				orf19.6654				orf19.6555				DAL1
													URA4				orf19.1180				orf19.5129				GNA1				orf19.178
													SOU1				orf19.3223.1				orf19.3048				orf19.2445				RIB3
													SCW11				orf19.3481				orf19.6852.1				SOD5				MET2
													SYG1				VPS33				orf19.95				orf19.1344				ATX1
													orf19.409				MGE1				orf19.1655.3				orf19.1913				orf19.6770
													GPM1				orf19.5114.1				TLO9				CEK1				FRE7
													SLK19				FUM12				STB3				orf19.5861.1				RPL7
													orf19.5842				orf19.2829				orf19.3216				GFA1				FRE10
													orf19.1189				orf19.2439.1				ALS9				orf19.4771				MET14
													orf19.6118				LYS12				CAR2				FGR6-4				NIT2
													CMK1				orf19.1625				BCY1				RTA2				PGA53
													XOG1				orf19.6731				orf19.3508				orf19.4780				ASE1
													orf19.1562				GCV3				GPM2				SEC18				orf19.2371
													PHO100				orf19.4946				PRP13				KRE1				orf19.1140
													CTR1				orf19.4061				orf19.3302				orf19.7260				SEC8
													orf19.6311				orf19.3810				orf19.5474				MUC1				RFC52
													HSP70				ARO2				TPS2				orf19.862				CSE4
													orf19.5455				orf19.6833.2				orf19.6114				AUR1				GOR1
													DBF2				orf19.499				orf19.7199				DOT5				orf19.9
													FMP27				orf19.501				orf19.733				SIP5				orf19.1508
													CSP37				orf19.7194				HHT2				orf19.1146				orf19.3432.1
													ROB1				orf19.6585				CUE5				orf19.5814				orf19.2335
													orf19.3325				orf19.69.2				TFS1				BMT3				NAG3
													SOD4				COX5				orf19.3073				TPK1				FCY2
													orf19.3319				orf19.7673				ROD1				GLX3				DAC1
													DSE1				orf19.1642				orf19.1564				SFU1				orf19.394
													PDC11				orf19.1388				YDC1				orf19.215				orf19.6240
													orf19.557				orf19.2067				orf19.2269				orf19.3123.2				CHS1
													orf19.1169				SEN2				GIN4				PGA33				orf19.1034
													orf19.4907				AIP2				CAT1				AAF1				orf19.1600
													PLB1				SHM2				ASM3				orf19.5775				orf19.3335
													DAK2				MEP1				MET4				orf19.246				orf19.5757
													FCR1				RHD2				PFK2				FLC2				PMA1
													orf19.1152				orf19.7590				orf19.1360.1				HGC1				orf19.1334
													orf19.2296				orf19.1124				ATC1				orf19.5290				CDC20
													ASR3				HCA4				orf19.338				KRE9				orf19.4749
													PIL1				ILV3				orf19.5475				orf19.2123				ERG6
													OPT7				MED1				orf19.3694				TUS1				orf19.5720
													ACE2				RPL28				orf19.988				orf19.374				orf19.6414
													GIT3				orf19.6675				NRG1				orf19.1414				orf19.6160
													orf19.6077				orf19.5288.1				WSC4				DFI1				orf19.6600
													GLK4				RAD16				orf19.1277				orf19.2049				PYC2
													TPS3				HIS7				orf19.2684				SAC7				FRE30
													orf19.7077				orf19.6838				GAD1				orf19.6879				orf19.2261
													PGI1				DEM1				ZRT2				PHR2				orf19.967
													orf19.2175				PGA44				SDS24				orf19.2203.1				orf19.3762
													SIT1				HAP41				PFK1				IML2				ERG28
													orf19.3869				orf19.4017				TOS1				PMC1				GAP4
													IQG1				HNM4				orf19.7396				orf19.7566				orf19.3469
													GLK1				orf19.1268				orf19.1486				orf19.3815				orf19.5840
													YWP1				orf19.1873				HHT21				RPN4				CDC54
													VTC4				orf19.5504				FBA1				MIT1				orf19.3678
													orf19.1887				orf19.6035				GAL4				MID1
													ASR2				PRS1				PGA62				orf19.2030
													orf19.4942				FAD3				GDB1				orf19.2726
													orf19.3364				orf19.913.2				orf19.3264.1				orf19.1910
													orf19.2372				ADE1				orf19.3998				SSR1
													PHO81				orf19.5340				POT1				orf19.3994
													ARA1				orf19.6903				orf19.5472				WSC1
													orf19.3522				RPP2A				orf19.5469				SAP10
													RBT7				orf19.1610								orf19.3535
													orf19.33				orf19.2821								orf19.711
													CWH8				ATF1								SAP9
													TYE7				orf19.4375								orf19.7341.1
													GSY1				SER2								orf19.5814.1
													FET34				orf19.3577.1								RIM101
													orf19.1691				orf19.1109								NAT4
													PGK1				RIP1								DAG7
													CDC19				orf19.1998								GLN1
													MET10				orf19.276								GRP2
																	HBR1								CCH1
																	orf19.1394								orf19.5614
																	orf19.2478								orf19.727
																	orf19.698								orf19.1266
																	ILV2								MNN15
																	orf19.7545								orf19.2680
																	MAK16								orf19.3919
																	orf19.732								orf19.5799
																	orf19.2310								orf19.7085
																	orf19.5194.1								orf19.25
																	orf19.6316.4								PDE2
																	UTP5								orf19.1374
																	orf19.7192								orf19.6264.3
																	orf19.4225.1								orf19.2125
																	ECM15								orf19.6929
																	orf19.6886								orf19.3259
																	OGG1								orf19.2431
																	SDH12								orf19.3827
																	MGM101								UBI4
																	orf19.6355								ENA21
																	KTI12								ECM29
																	orf19.446.1								orf19.5813
																	orf19.6366								BGL2
																	GCV1								orf19.4134
																	orf19.1549								orf19.3919.1
																	ACO2								orf19.1830
																	orf19.4814								RFX1
																	orf19.1305								GPD2
																	orf19.134								CRZ1
																	PGA45								CHS7
																	orf19.4949								orf19.2565
																	ASN1								orf19.7109
																	orf19.7244								orf19.433
																	orf19.4812								orf19.5352
																	CYT1								ECM331
																	RLM1								orf19.1441
																	SER1								PGA52
																	orf19.3742								orf19.7567
																	orf19.2362								VPS1
																	CPR6								orf19.6920
																	YTM1								orf19.4043
																	orf19.5553								MNN2
																	NAR1								orf19.7069
																	orf19.6805								JEM1
																	EFB1								orf19.783
																	HSP90								DFG10
																	NHP2								HAC1
																	orf19.1682								orf19.3928
																	NOC2								IFU5
																	orf19.7485								orf19.376
																	YNK1								PNG2
																	orf19.5564								orf19.3828
																	orf19.6350								orf19.4563
																	orf19.3196								PEP8
																	REX2								orf19.5517
																	REI1								orf19.4893
																	RAD6								BRG1
																	FGR46								ERO1
																	orf19.2314								orf19.192
																	DAD3								orf19.4706
																	WBP1								CPP1
																	LAB5								orf19.6030
																	MIS12								orf19.674
																	NOP5								orf19.6896
																	RPA34								AGP2
																	RAD32								GPR1
																	ARC18								CRL1
																	orf19.4883								orf19.4711
																	orf19.3578								INN1
																	orf19.6220								PGA13
																	orf19.5225								SPS20
																	orf19.3061.1								GDH2
																	TSR1								ROT1
																	MIS11								RCN1
																	IDH1								orf19.4046
																	NOG2								ACT1
																	orf19.1676								PIN3
																	MCI4								orf19.4792
																	TRP3								HSE1
																	orf19.1800								orf19.2459
																	orf19.7279.1								orf19.1667.1
																	URA2								orf19.782
																	orf19.5905								orf19.4894
																	QCR9								orf19.7210
																	orf19.7589								FLC1
																	orf19.1030								orf19.7504
																	SER33								KTR4
																	orf19.5885								orf19.6905
																	orf19.1272								orf19.2925
																	orf19.7397.1								orf19.211
																	ADE5,7								CHO1
																	SEO1								ITR1
																	orf19.4922								orf19.1267
																	CIT1								orf19.3080
																	ADE8								orf19.3826
																	orf19.5364								PGA54
																	orf19.827								orf19.1208
																	orf19.4960								orf19.3219
																	orf19.2018.1								RFC5
																	ADE17								orf19.7299.1
																	RPF1								orf19.3854
																	AAT1								orf19.372
																	GPX2								BMT5
																	orf19.287								orf19.1430
																	TRM12								orf19.5431
																	orf19.7215.3								ARE2
																	orf19.1367.1								orf19.2308
																	orf19.1968								INO1
																	NMD3								orf19.7110
																	ATS1								MNN1
																	BUL1								TVP18
																	BAT21								SKN1
																	orf19.4365								orf19.3309
																	orf19.2386								STP4
																	orf19.3990								orf19.4263
																	LEU4								orf19.6608
																	TRM1								KRE6
																	HAS1								orf19.263.1
																	ARO4								PLB3
																	MAM33
																	DIP5
																	orf19.4450.1
																	orf19.7618
																	orf19.7398
																	orf19.4705
																	orf19.7624
																	PAM16
																	orf19.3124
																	MMD1
																	orf19.5837
																	LYS22
																	orf19.4789
																	SIK1
																	orf19.1815
																	POP3
																	orf19.5287
																	orf19.3559
																	ALI1
																	ATP18
																	PRR2
																	orf19.7013
																	MRT4
																	orf19.2637
																	orf19.5879
																	orf19.7300
																	orf19.1872
																	orf19.6828
																	orf19.1082
																	FMA1
																	CHR1
																	orf19.225
																	orf19.2010
																	orf19.7603
																	orf19.2091
																	ADE2
																	orf19.2128
																	FESUR1
																	RPF2
																	orf19.2934
																	orf19.3547
																	orf19.3517
																	CUP9
																	ANT1
																	orf19.1791
																	HOM2
																	HOL1
																	orf19.1985
																	PHO87
																	orf19.4016
