# Supplementary material for: The Candida albicans transcription factor Cas5 couples stress responses, drug resistance and cell cycle regulation
Source: Nat Commun. 2017 Sep 11;8:499. doi: 10.1038/s41467-017-00547-y (PMC5593949; doi:10.1038/s41467-017-00547-y)
Supplement: Supplementary file 7 — Supplementary Data 6 [file 41467_2017_547_MOESM7_ESM.xlsx]

## Sheet: Legend
Supplementary Data 6 - Cell cycle expression pattern of genes differentially bound in cas5∆/cas5∆ mutant in comparison to the wild type strain under basal caspofungin treatment conditions.
Sheet 1: Cell cycle expression pattern of differentially bound genes between cas5∆/cas5∆ mutant and the wild type strain under basal and caspofungin treatment conditions.
The ORF numbers under gene names are derived from Genome Assembly 21.
The cell cycle expression pattern is obtained from the Candida cell cycle database.
Sheet 2: Summary of the number of differentially bound genes whose expression fluctuates with the cell cycle under the basal condition.

## Sheet: 1. Cell Cycle Exp Pattern
Cell cycle expression pattern of differentially bound genes between cas5∆/cas5∆ mutant and the wild type strain under basal and caspofungin treatment conditions.
No Caspofungin					Caspofungin Treated
cas5∆/WT UP		cas5∆/WT DOWN			cas5∆/WT UP		cas5∆/WT DOWN
Cell Cycle	Gene Name	Cell Cycle	Gene Name		Cell Cycle	Gene Name	Cell Cycle	Gene Name
70% (G2)	orf19.2947 / SNZ1	99% (M/G1)	orf19.3629 / DSE1		99% (M/G1)	orf19.1600	99% (M/G1)	orf19.2758 / PGA38
87% (M)	orf19.2451 / PGA45	99% (M/G1)	orf19.220 / PIR1		96% (M/G1)	orf19.4354	96% (M/G1)	orf19.3893 / SCW11
85% (G2/M)	orf19.4066	99% (M/G1)	orf19.2758 / PGA38		94% (M)	orf19.5019	95% (M/G1)	orf19.4910 / FGR41
68% (G2)	orf19.3870 / ADE13	98% (M/G1)	orf19.1562		93% (M)	orf19.3469	94% (M)	orf19.2706 / CRH11
67% (G2)	orf19.5906 / ADE2	98% (M/G1)	orf19.1507		93% (M)	orf19.1901	88% (M)	orf19.1144
66% (G2)	orf19.5750 / SHM2	96% (M/G1)	orf19.3893 / SCW11		92% (M)	orf19.3761 / CDC54	70% (G2)	orf19.1671 / UTR2
61% (S/G2)	orf19.2948 / SNO1	95% (M/G1)	orf19.3066 / ENG1		91% (M)	orf19.5487 / CDC46	61% (S/G2)	orf19.5818 / SUR2
56% (S/G2)	orf19.385 / GCV2	95% (M/G1)	orf19.4910 / FGR41		86% (M)	orf19.6784 / PGA32	56% (S/G2)	orf19.376
56% (S/G2)	orf19.3547	94% (M)	orf19.5343 / ASH1		82% (G2/M)	orf19.5106 / DIP2	53% (S)	orf19.2238 / LTE1
46% (S)	orf19.6585	85% (G2/M)	orf19.1246		80% (G2/M)	orf19.4274 / PUT1	52% (S)	orf19.4765 / PGA6
40% (G1/S)	orf19.3501	83% (G2/M)	orf19.1223		74% (G2)	orf19.3276 / PWP2	51% (S)	orf19.1059 / HHF1
39% (G1/S)	orf19.1985	83% (G2/M)	orf19.1442 / PLB4.5		73% (G2)	orf19.2723 / HIT1	49% (S)	orf19.1854 / HHF22
36% (G1/S)	orf19.6073 / HMX1	82% (G2/M)	orf19.6536 / IQG1		70% (G2)	orf19.2947 / SNZ1	48% (S)	orf19.1061 / HHT21
		81% (G2/M)	orf19.6008		68% (G2)	orf19.3870 / ADE13	39% (G1/S)	orf19.3216
		78% (G2/M)	orf19.6124 / ACE2		67% (G2)	orf19.5906 / ADE2	37% (G1/S)	orf19.6813
		75% (G2/M)	orf19.5316 / FGR29		66% (G2)	orf19.5750 / SHM2	37% (G1/S)	orf19.4867 / SWE1
		73% (G2)	orf19.1747 / KIP2		61% (S/G2)	orf19.2948 / SNO1	36% (G1/S)	orf19.3083
		70% (G2)	orf19.5636 / RBT5		56% (S/G2)	orf19.385 / GCV2	35% (G1/S)	orf19.4255 / ECM331
		62% (S/G2)	orf19.1224 / FRP3		56% (S/G2)	orf19.3547	34% (G1/S)	orf19.4308 / HSL1
		52% (S)	orf19.4765 / PGA6		46% (S)	orf19.6585	33% (G1/S)	orf19.5171 / PMT1
		51% (S)	orf19.1059 / HHF1		39% (G1/S)	orf19.716	33% (G1/S)	orf19.403 / PCL2
		50% (S)	orf19.6562 / RNH35				32% (G1/S)	orf19.7186 / CLB4
		50% (S)	orf19.2426				30% (G1)	orf19.4945 / MSH6
		49% (S)	orf19.1854 / HHF22				28% (G1)	orf19.7634 / MCD1
		47% (S)	orf19.1853 / HHT2				28% (G1)	orf19.5775
		39% (G1/S)	orf19.3216				28% (G1)	orf19.5518
		37% (G1/S)	orf19.4867 / SWE1				27% (G1)	orf19.5191 / FGR6-1
		34% (G1/S)	orf19.1976				27% (G1)	orf19.4712 / FGR6-3
		33% (G1/S)	orf19.403 / PCL2				27% (G1)	orf19.3694
		32% (G1/S)	orf19.3319				26% (G1)	orf19.727
		31% (G1/S)	orf19.3093 / MSH2				25% (G1)	orf19.1390 / PMI1
		28% (G1)	orf19.5518				25% (G1)	orf19.4390
		27% (G1)	orf19.3694				25% (G1)	orf19.1889
		26% (G1)	orf19.1391				25% (G1)	orf19.663 / GIN4
		25% (G1)	orf19.663 / GIN4				23% (G1)	orf19.3490 / FGR6-4
		25% (G1)	orf19.4390				22% (G1)	orf19.926
		25% (G1)	orf19.2174 / RAD57				21% (G1)	orf19.7017 / YOX1
		24% (G1)	orf19.95				20% (G1)	orf19.4853 / HCM1
		19% (G1)	orf19.3207 / CCN1				19% (G1)	orf19.5292 / AXL2
		18% (G1)	orf19.3048				19% (G1)	orf19.1208
		14% (G1)	orf19.338				19% (G1)	orf19.3207 / CCN1
		14% (G1)	orf19.2649 / PCL1				18% (G1)	orf19.3048
		12% (G1)	orf19.7586 / CHT3				14% (G1)	orf19.3740 / PGA23
							14% (G1)	orf19.2649 / PCL1
							12% (G1)	orf19.7586 / CHT3

## Sheet: 2. Summary
Summary of the number of differentially bound genes whose expression fluctuates with the cell cycle under the basal condition.
	No Caspofungin				Caspofungin Treated
	DOWN	UP			DOWN	UP
M/G1	8	0		M/G1	3	2
M	1	1		M	2	6
G2/M	7	1		G2/M	0	2
G2	2	4		G2	1	6
S/G2	1	3		S/G2	2	3
S	6	1		S	5	1
G1/S	6	3		G1/S	9	1
G1	12	0		G1	23	0
Total	43	13		Total	45	21
