# Supplementary material for: The Candida albicans transcription factor Cas5 couples stress responses, drug resistance and cell cycle regulation
Source: Nat Commun. 2017 Sep 11;8:499. doi: 10.1038/s41467-017-00547-y (PMC5593949; doi:10.1038/s41467-017-00547-y)
Supplement: Supplementary file 8 — Supplementary Data 7 [file 41467_2017_547_MOESM8_ESM.xlsx]

## Sheet: Legend
Supplementary Data 7 - Physical interactors of Cas5 identified by co-immunoprecipitation coupled with mass spectrometry.
Sheet 1: Cas5 interactors identified by co-immunoprecipitation coupled with mass spectrometry in three biological replicates.
The accession number corresponds to the protein annotation in UniProt/TrEMBL.
Sheet 2: SAINT analysis of the Cas5 interactors identified by co-immunoprecipitation coupled with mass spectrometry.
FC refers to fold change, calculated based on the ratio of average normalized spectral counts in the bait samples versus the negative controls.
FC_A is the the standard FC score, or the primary score.
FC_B represents more stringent score, as analyzed by the CRAPome.

## Sheet: 1. Cas5 Interactors by IP-MS
Physical interactors of Cas5 identified by co-immunoprecipitation coupled with mass spectrometry.
#	Identified Proteins (1624)	Accession Number	Molecular Weight	Untagged Control			Cas5-HA
				Rep #1	Rep #2	Rep #3	Rep #1	Rep #2	Rep #3
1	Cluster of Beta-1,3-glucan synthase OS=Candida albicans (strain SC5314 / ATCC MYA-2876) GN=GSC1 PE=4 SV=1 (Q5AIC4_CANAL)	Q5AIC4_CANAL	218 kDa	30	65	49	56	44	37
2	Cluster of ATP-dependent RNA helicase DED1 OS=Candida albicans (strain SC5314 / ATCC MYA-2876) GN=DED1 PE=3 SV=1 (DED1_CANAL)	DED1_CANAL [2]	73 kDa	14	99	61	30	58	46
2.1	ATP-dependent RNA helicase DED1 OS=Candida albicans (strain SC5314 / ATCC MYA-2876) GN=DED1 PE=3 SV=1	DED1_CANAL	73 kDa	9	48	36	18	31	23
2.2	ATP-dependent RNA helicase DBP2 OS=Candida albicans (strain SC5314 / ATCC MYA-2876) GN=DBP2 PE=3 SV=2	DBP2_CANAL	61 kDa	5	56	28	12	31	25
3	Likely cytosolic ribosomal protein L4 OS=Candida albicans (strain SC5314 / ATCC MYA-2876) GN=RPL4B PE=4 SV=1	Q59ZX4_CANAL	39 kDa	25	46	81	35	38	74
4	Cluster of Likely cytosolic ribosomal protein L8 OS=Candida albicans (strain SC5314 / ATCC MYA-2876) GN=RPL8B PE=4 SV=1 (Q5ANA1_CANAL)	Q5ANA1_CANAL [2]	28 kDa	13	38	74	18	25	69
4.1	Likely cytosolic ribosomal protein L8 OS=Candida albicans (strain SC5314 / ATCC MYA-2876) GN=RPL8B PE=4 SV=1	Q5ANA1_CANAL	28 kDa	13	37	73	18	24	68
4.2	Likely cytosolic ribosomal protein L8 OS=Candida albicans (strain SC5314 / ATCC MYA-2876) GN=RPL82 PE=4 SV=1	Q59WJ0_CANAL	28 kDa	11	34	63	16	23	63
5	Cluster of Elongation factor 1-alpha 1 OS=Candida albicans (strain SC5314 / ATCC MYA-2876) GN=TEF1 PE=3 SV=1 (EF1A1_CANAL)	EF1A1_CANAL [2]	50 kDa	10	43	94	19	31	24
5.1	Elongation factor 1-alpha 1 OS=Candida albicans (strain SC5314 / ATCC MYA-2876) GN=TEF1 PE=3 SV=1	EF1A1_CANAL	50 kDa	10	43	89	19	31	24
5.2	Elongation factor 1-alpha 2 OS=Candida albicans (strain SC5314 / ATCC MYA-2876) GN=TEF2 PE=3 SV=1	EF1A2_CANAL	50 kDa	10	43	87	18	31	24
6	Potential zinc finger protein OS=Candida albicans (strain SC5314 / ATCC MYA-2876) GN=CAS5 PE=4 SV=1	Q5AMH6_CANAL	93 kDa	0	0	0	54	11	56
7	Cluster of Heat shock protein SSA2 OS=Candida albicans (strain SC5314 / ATCC MYA-2876) GN=SSA2 PE=1 SV=3 (HSP72_CANAL)	HSP72_CANAL [2]	70 kDa	1	28	89	13	26	28
8	Enolase 1 OS=Candida albicans (strain SC5314 / ATCC MYA-2876) GN=ENO1 PE=1 SV=1	ENO1_CANAL	47 kDa	3	8	115	0	8	25
9	Fatty acid synthetase beta subunit OS=Candida albicans (strain SC5314 / ATCC MYA-2876) GN=FAS1 PE=4 SV=1	Q5A4W7_CANAL	228 kDa	0	14	74	10	21	6
10	Likely cytosolic ribosomal protein L3 OS=Candida albicans (strain SC5314 / ATCC MYA-2876) GN=RPL3 PE=3 SV=1	Q59LS1_CANAL	44 kDa	6	17	58	18	14	5
11	Putative uncharacterized protein SSB1 OS=Candida albicans (strain SC5314 / ATCC MYA-2876) GN=SSB1 PE=3 SV=1	Q5A397_CANAL	66 kDa	6	23	64	19	20	16
12	Likely cytosolic ribosomal protein S20 OS=Candida albicans (strain SC5314 / ATCC MYA-2876) GN=RPS20 PE=3 SV=1	Q5A389_CANAL	13 kDa	4	22	38	6	14	32
13	Elongation factor 3 OS=Candida albicans (strain SC5314 / ATCC MYA-2876) GN=CEF3 PE=1 SV=2	EF3_CANAL	117 kDa	1	14	73	5	9	9
14	40S ribosomal protein S1 OS=Candida albicans (strain SC5314 / ATCC MYA-2876) GN=RPS1 PE=3 SV=3	RS3A_CANAL	29 kDa	11	17	33	18	13	17
15	Pyruvate decarboxylase OS=Candida albicans (strain SC5314 / ATCC MYA-2876) GN=PDC11 PE=1 SV=2	PDC1_CANAL	62 kDa	0	9	76	1	6	14
16	Elongation factor 2 OS=Candida albicans (strain SC5314 / ATCC MYA-2876) GN=EFT2 PE=1 SV=2	EF2_CANAL	93 kDa	0	12	67	1	6	8
17	Likely cytosolic ribosomal protein S7 OS=Candida albicans (strain SC5314 / ATCC MYA-2876) GN=RPS7A PE=4 SV=1	Q5AJ93_CANAL	21 kDa	13	21	32	15	12	23
18	Glyceraldehyde-3-phosphate dehydrogenase OS=Candida albicans (strain SC5314 / ATCC MYA-2876) GN=TDH3 PE=3 SV=1	Q5ADM7_CANAL	36 kDa	2	9	89	1	10	13
19	ATP synthase subunit beta OS=Candida albicans (strain SC5314 / ATCC MYA-2876) GN=ATP2 PE=3 SV=1	Q59UR7_CANAL	56 kDa	9	10	47	15	13	18
20	60S ribosomal protein L13 OS=Candida albicans (strain SC5314 / ATCC MYA-2876) GN=RPL13 PE=3 SV=1	RL13_CANAL	23 kDa	11	20	21	15	14	26
21	Putative uncharacterized protein IRA2 OS=Candida albicans (strain SC5314 / ATCC MYA-2876) GN=IRA2 PE=4 SV=1	Q5A3Q1_CANAL (+1)	305 kDa	0	6	2	0	4	3
22	Potential mitochondrial inner membrane ATP/ADP translocator OS=Candida albicans (strain SC5314 / ATCC MYA-2876) GN=PET9 PE=3 SV=1	Q5A516_CANAL	33 kDa	7	13	29	12	14	20
23	Phosphoglycerate kinase OS=Candida albicans (strain SC5314 / ATCC MYA-2876) GN=PGK1 PE=1 SV=1	PGK_CANAL	45 kDa	0	6	64	0	6	19
24	Putative uncharacterized protein TIF3 OS=Candida albicans (strain SC5314 / ATCC MYA-2876) GN=TIF3 PE=4 SV=1	Q5A4L8_CANAL	51 kDa	10	27	16	18	18	25
25	Likely cytosolic ribosomal protein S3 OS=Candida albicans (strain SC5314 / ATCC MYA-2876) GN=RPS3 PE=3 SV=1	Q59N00_CANAL	27 kDa	4	13	37	12	9	12
26	Putative uncharacterized protein OS=Candida albicans (strain SC5314 / ATCC MYA-2876) GN=CaO19.7350 PE=4 SV=1	Q5A4I4_CANAL	21 kDa	13	16	9	18	12	12
27	Putative uncharacterized protein NPL3 OS=Candida albicans (strain SC5314 / ATCC MYA-2876) GN=NPL3 PE=4 SV=1	Q59ZV3_CANAL	32 kDa	5	38	18	10	18	15
28	40S ribosomal protein S8 OS=Candida albicans (strain SC5314 / ATCC MYA-2876) GN=RPS8A PE=3 SV=1	Q59T44_CANAL	23 kDa	13	14	26	17	5	13
29	Likely cytosolic ribosomal protein S4 OS=Candida albicans (strain SC5314 / ATCC MYA-2876) GN=RPS4A PE=3 SV=1	Q5A5Q8_CANAL	29 kDa	6	10	34	11	9	6
30	40S ribosomal protein S24 OS=Candida albicans (strain SC5314 / ATCC MYA-2876) GN=RPS24 PE=3 SV=1	Q5A7K0_CANAL	16 kDa	8	13	22	13	8	14
31	Fructose-bisphosphate aldolase OS=Candida albicans (strain SC5314 / ATCC MYA-2876) GN=FBA1 PE=1 SV=2	ALF_CANAL	39 kDa	0	5	64	0	7	17
32	Pyruvate kinase OS=Candida albicans (strain SC5314 / ATCC MYA-2876) GN=CDC19 PE=1 SV=3	KPYK_CANAL	55 kDa	1	6	52	2	4	6
33	Guanine nucleotide-binding protein subunit beta-like protein OS=Candida albicans (strain SC5314 / ATCC MYA-2876) GN=ASC1 PE=1 SV=2	GBLP_CANAL	35 kDa	4	15	37	11	16	12
34	ATP synthase subunit alpha OS=Candida albicans (strain SC5314 / ATCC MYA-2876) GN=ATP1 PE=3 SV=1	Q59RD8_CANAL	49 kDa	2	11	35	5	9	10
35	Likely cytosolic ribosomal protein L17 OS=Candida albicans (strain SC5314 / ATCC MYA-2876) GN=RPL17B PE=3 SV=1	Q59TE0_CANAL	21 kDa	9	10	18	13	8	20
36	Histone H2B.1 OS=Candida albicans (strain SC5314 / ATCC MYA-2876) GN=HTB1 PE=3 SV=3	H2B1_CANAL (+1)	14 kDa	4	5	10	8	6	12
37	Putative uncharacterized protein PMA1 OS=Candida albicans (strain SC5314 / ATCC MYA-2876) GN=PMA1 PE=3 SV=1	Q5A7T3_CANAL	98 kDa	3	12	34	12	8	8
38	Likely cytosolic ribosomal protein L12 OS=Candida albicans (strain SC5314 / ATCC MYA-2876) GN=RPL12 PE=3 SV=1	Q5AJF7_CANAL	18 kDa	13	19	25	14	11	23
39	60S ribosomal protein L20 OS=Candida albicans (strain SC5314 / ATCC MYA-2876) GN=RPL20B PE=3 SV=1	Q5AML4_CANAL	20 kDa	5	12	23	11	8	10
40	Likely cytosolic ribosomal protein S2 OS=Candida albicans (strain SC5314 / ATCC MYA-2876) GN=RPS21 PE=3 SV=1	Q5A900_CANAL	27 kDa	4	9	37	13	9	8
41	Likely cytosolic ribosomal protein L10 OS=Candida albicans (strain SC5314 / ATCC MYA-2876) GN=RPL10 PE=4 SV=1	Q5AIB8_CANAL	25 kDa	2	16	37	10	9	9
42	Heat shock protein SSC1, mitochondrial OS=Candida albicans (strain SC5314 / ATCC MYA-2876) GN=SSC1 PE=1 SV=2	HSP77_CANAL	70 kDa	0	6	33	0	3	10
43	Likely cytosolic ribosomal protein L23 OS=Candida albicans (strain SC5314 / ATCC MYA-2876) GN=RPL23A PE=3 SV=1	Q59M73_CANAL	12 kDa	9	15	20	11	9	18
44	Likely cytosolic ribosomal protein S23 OS=Candida albicans (strain SC5314 / ATCC MYA-2876) GN=RPS23A PE=3 SV=1	Q5AAQ8_CANAL	16 kDa	13	8	20	15	4	14
45	Cluster of Putative uncharacterized protein ADH1 OS=Candida albicans (strain SC5314 / ATCC MYA-2876) GN=ADH1 PE=3 SV=1 (Q5AKI5_CANAL)	Q5AKI5_CANAL [2]	46 kDa	0	5	58	0	5	12
45.1	Putative uncharacterized protein ADH1 OS=Candida albicans (strain SC5314 / ATCC MYA-2876) GN=ADH1 PE=3 SV=1	Q5AKI5_CANAL	46 kDa	0	5	58	0	5	12
45.2	Putative uncharacterized protein ADH1 OS=Candida albicans (strain SC5314 / ATCC MYA-2876) GN=ADH1 PE=3 SV=1	Q5AK23_CANAL	46 kDa	0	0	55	0	0	12
46	Putative uncharacterized protein OS=Candida albicans (strain SC5314 / ATCC MYA-2876) GN=MET13 PE=4 SV=1	Q5A1D2_CANAL	23 kDa	12	13	10	10	12	10
47	Likely cytosolic ribosomal protein S5 OS=Candida albicans (strain SC5314 / ATCC MYA-2876) GN=RPS5 PE=3 SV=1	Q5AG43_CANAL	25 kDa	7	9	37	13	9	2
48	Putative uncharacterized protein NOP1 OS=Candida albicans (strain SC5314 / ATCC MYA-2876) GN=NOP1 PE=3 SV=1	Q5A0V9_CANAL	33 kDa	5	26	20	10	12	13
49	Likely cytosolic ribosomal acidic protein P0 OS=Candida albicans (strain SC5314 / ATCC MYA-2876) GN=RPP0 PE=3 SV=1	Q5AFQ4_CANAL	33 kDa	6	13	29	9	15	13
50	Eukaryotic translation initiation factor 5A OS=Candida albicans (strain SC5314 / ATCC MYA-2876) GN=ANB1 PE=3 SV=1	IF5A_CANAL	17 kDa	9	11	19	10	12	13
51	Cluster of Ubiquitin-ribosomal protein fusion S27a OS=Candida albicans (strain SC5314 / ATCC MYA-2876) GN=UBI3 PE=4 SV=1 (Q5A109_CANAL)	Q5A109_CANAL	23 kDa	6	12	16	9	3	32
51.1	Ubiquitin-ribosomal protein fusion S27a OS=Candida albicans (strain SC5314 / ATCC MYA-2876) GN=UBI3 PE=4 SV=1	Q5A109_CANAL	23 kDa	6	12	16	9	3	32
52	Putative uncharacterized protein LAT1 OS=Candida albicans (strain SC5314 / ATCC MYA-2876) GN=LAT1 PE=3 SV=1	Q5AGX8_CANAL	50 kDa	3	11	18	11	11	15
53	Likely cytosolic ribosomal protein S15 OS=Candida albicans (strain SC5314 / ATCC MYA-2876) GN=RPS15 PE=3 SV=1	Q5ANH6_CANAL	13 kDa	4	7	22	10	8	15
54	Fatty acid synthase alpha subunit, N terminal OS=Candida albicans (strain SC5314 / ATCC MYA-2876) GN=FAS2 PE=4 SV=1	Q5ANF2_CANAL	88 kDa	0	9	31	2	12	4
55	Likely cytosolic ribosomal protein L24 OS=Candida albicans (strain SC5314 / ATCC MYA-2876) GN=RPL24A PE=4 SV=1	Q5A6A1_CANAL	17 kDa	6	15	18	11	10	16
56	40S ribosomal protein S0 OS=Candida albicans (strain SC5314 / ATCC MYA-2876) GN=RPS0 PE=2 SV=2	RSSA_CANAL	29 kDa	1	12	26	2	8	9
57	Putative uncharacterized protein COX4 OS=Candida albicans (strain SC5314 / ATCC MYA-2876) GN=COX4 PE=4 SV=1	Q5ALV5_CANAL	17 kDa	6	8	12	10	7	20
58	Multiprotein-bridging factor 1 OS=Candida albicans (strain SC5314 / ATCC MYA-2876) GN=MBF1 PE=3 SV=1	MBF1_CANAL	16 kDa	12	10	6	15	10	12
59	60S ribosomal protein L10a OS=Candida albicans (strain SC5314 / ATCC MYA-2876) GN=RPL10A PE=3 SV=2	RL10A_CANAL	24 kDa	2	9	23	8	5	9
60	Likely cytosolic ribosomal protein L16 OS=Candida albicans (strain SC5314 / ATCC MYA-2876) GN=RPL16A PE=3 SV=1	Q5AB87_CANAL	23 kDa	0	12	16	11	5	6
61	Likely cytosolic ribosomal protein S25 OS=Candida albicans (strain SC5314 / ATCC MYA-2876) GN=RPS25B PE=4 SV=1	Q59NZ2_CANAL	12 kDa	10	10	14	17	9	12
62	Putative uncharacterized protein PDA1 OS=Candida albicans (strain SC5314 / ATCC MYA-2876) GN=PDA1 PE=4 SV=1	Q5A0Z9_CANAL	44 kDa	2	10	27	7	3	1
63	Ribosomal protein L15 OS=Candida albicans (strain SC5314 / ATCC MYA-2876) GN=RPL15A PE=3 SV=1	Q5A6R1_CANAL	24 kDa	5	10	16	8	7	8
64	Potential mitochondrial inorganic phosphate transporter OS=Candida albicans (strain SC5314 / ATCC MYA-2876) GN=MIR1 PE=3 SV=1	Q5AP79_CANAL	33 kDa	1	5	20	3	7	10
65	Dihydrolipoyl dehydrogenase OS=Candida albicans (strain SC5314 / ATCC MYA-2876) GN=LPD1 PE=3 SV=1	Q59RQ6_CANAL	53 kDa	2	10	20	7	6	5
66	Aconitate hydratase, mitochondrial OS=Candida albicans (strain SC5314 / ATCC MYA-2876) GN=ACO1 PE=1 SV=2	ACON_CANAL	84 kDa	0	2	34	0	1	8
67	Putative uncharacterized protein PDB1 OS=Candida albicans (strain SC5314 / ATCC MYA-2876) GN=PDB1 PE=4 SV=1	Q5A5V6_CANAL	41 kDa	5	10	19	10	7	7
68	Likely cytosolic ribosomal protein L9 OS=Candida albicans (strain SC5314 / ATCC MYA-2876) GN=RPL9B PE=4 SV=1	Q5AEN2_CANAL	22 kDa	6	11	25	11	5	4
69	Cytochrome b-c1 complex subunit 2, mitochondrial OS=Candida albicans (strain SC5314 / ATCC MYA-2876) GN=QCR2 PE=1 SV=2	QCR2_CANAL	40 kDa	0	15	21	2	10	15
70	Heat shock protein 90 homolog OS=Candida albicans (strain SC5314 / ATCC MYA-2876) GN=HSP90 PE=1 SV=1	HSP90_CANAL	81 kDa	0	2	35	0	2	1
71	Likely cytosolic ribosomal protein L5 OS=Candida albicans (strain SC5314 / ATCC MYA-2876) GN=RPL5 PE=3 SV=1	Q5AGZ7_CANAL	35 kDa	4	4	27	9	5	3
72	40S ribosomal protein S6 OS=Candida albicans (strain SC5314 / ATCC MYA-2876) GN=RPS6A PE=3 SV=1	Q5AMI6_CANAL	23 kDa	8	12	14	10	8	7
73	Aspartate transcarbamylase OS=Candida albicans (strain SC5314 / ATCC MYA-2876) GN=URA2 PE=3 SV=1	Q59SN3_CANAL (+1)	245 kDa	0	0	41	0	2	0
74	60S ribosomal protein L18 OS=Candida albicans (strain SC5314 / ATCC MYA-2876) GN=RPL18 PE=3 SV=1	Q5ANC2_CANAL	17 kDa	4	11	17	5	7	9
75	40S ribosomal protein S22 OS=Candida albicans (strain SC5314 / ATCC MYA-2876) GN=RPS22A PE=3 SV=3	RS22_CANAL	15 kDa	4	10	23	7	10	8
76	Potential DNA binding component of SBF OS=Candida albicans (strain SC5314 / ATCC MYA-2876) GN=SWI4 PE=4 SV=1	Q59TI4_CANAL	112 kDa	0	0	0	7	7	14
77	Putative uncharacterized protein COR1 OS=Candida albicans (strain SC5314 / ATCC MYA-2876) GN=COR1 PE=3 SV=1	Q5AK04_CANAL	48 kDa	0	7	21	3	4	18
78	Likely mitochondrial ribosomal protein S18 OS=Candida albicans (strain SC5314 / ATCC MYA-2876) GN=RSM18 PE=4 SV=1	Q59KY7_CANAL	22 kDa	0	2	3	0	2	4
79	Likely cytosolic ribosomal protein S18 OS=Candida albicans (strain SC5314 / ATCC MYA-2876) GN=RPS18 PE=3 SV=1	Q5AFQ0_CANAL	16 kDa	0	6	17	6	8	6
80	Putative uncharacterized protein SCD6 OS=Candida albicans (strain SC5314 / ATCC MYA-2876) GN=SCD6 PE=4 SV=1	Q5AAR2_CANAL	38 kDa	8	15	9	12	11	11
81	Likely cytosolic ribosomal protein S26 OS=Candida albicans (strain SC5314 / ATCC MYA-2876) GN=RPS26A PE=4 SV=1	Q5ALV6_CANAL	14 kDa	6	8	10	7	3	10
82	Putative uncharacterized protein ACT1 OS=Candida albicans (strain SC5314 / ATCC MYA-2876) GN=ACT1 PE=3 SV=1	Q5AKX0_CANAL	40 kDa	1	4	24	3	2	5
83	Mitochondrial outer membrane protein porin OS=Candida albicans (strain SC5314 / ATCC MYA-2876) GN=POR1 PE=1 SV=2	VDAC_CANAL	30 kDa	2	6	15	4	7	7
84	40S ribosomal protein S12 OS=Candida albicans (strain SC5314 / ATCC MYA-2876) GN=RPS12 PE=3 SV=1	Q5ADQ6_CANAL	16 kDa	2	9	18	6	12	10
85	Putative uncharacterized protein OS=Candida albicans (strain SC5314 / ATCC MYA-2876) GN=CaO19.8566 PE=4 SV=1	Q5A4Z5_CANAL	18 kDa	0	1	1	0	1	1
86	Likely cytosolic ribosomal protein L21 OS=Candida albicans (strain SC5314 / ATCC MYA-2876) GN=RPL21A PE=4 SV=1	Q5AHF6_CANAL	12 kDa	6	5	11	8	4	7
87	Likely mitochondrial ATP synthase subunit Atp5 OS=Candida albicans (strain SC5314 / ATCC MYA-2876) GN=ATP5 PE=3 SV=1	Q5A7P7_CANAL	22 kDa	0	7	17	0	5	12
88	Likely cytosolic ribosomal protein L11 OS=Candida albicans (strain SC5314 / ATCC MYA-2876) GN=RPL11 PE=3 SV=1	Q59Z66_CANAL	19 kDa	1	6	15	4	6	3
89	Fatty acid synthase alpha subunit, C terminal OS=Candida albicans (strain SC5314 / ATCC MYA-2876) GN=FAS2 PE=3 SV=1	Q5ANF5_CANAL	100 kDa	0	8	23	3	6	3
90	Probable amidase OS=Candida albicans (strain SC5314 / ATCC MYA-2876) GN=AMD21 PE=4 SV=1	Q5ACD5_CANAL	64 kDa	0	1	0	0	1	1
91	Heat shock protein 60, mitochondrial OS=Candida albicans (strain SC5314 / ATCC MYA-2876) GN=HSP60 PE=1 SV=1	HSP60_CANAL	60 kDa	0	3	31	0	4	6
92	Potential stress response protein OS=Candida albicans (strain SC5314 / ATCC MYA-2876) GN=DDR48 PE=4 SV=1	Q59X49_CANAL	23 kDa	9	6	6	20	6	7
93	Likely translation initiation factor eIF2 beta subunit OS=Candida albicans (strain SC5314 / ATCC MYA-2876) GN=SUI3 PE=4 SV=1	Q5A0D3_CANAL	31 kDa	0	7	10	0	8	6
94	Putative uncharacterized protein ACC1 OS=Candida albicans (strain SC5314 / ATCC MYA-2876) GN=ACC1 PE=4 SV=1	Q5AAM4_CANAL	253 kDa	0	0	35	0	0	0
95	ATP-dependent RNA helicase eIF4A OS=Candida albicans (strain SC5314 / ATCC MYA-2876) GN=TIF1 PE=3 SV=1	IF4A_CANAL	45 kDa	0	2	30	0	3	1
96	Mannose-1-phosphate guanyltransferase OS=Candida albicans (strain SC5314 / ATCC MYA-2876) GN=MPG1 PE=1 SV=1	MPG1_CANAL	40 kDa	1	5	18	4	2	5
97	Putative uncharacterized protein TIF11 OS=Candida albicans (strain SC5314 / ATCC MYA-2876) GN=TIF11 PE=3 SV=1	Q5A5P8_CANAL	17 kDa	3	14	9	6	9	8
98	Clathrin heavy chain OS=Candida albicans (strain SC5314 / ATCC MYA-2876) GN=CHC1 PE=3 SV=1	Q59M82_CANAL	190 kDa	0	2	27	0	1	1
99	DNA-directed RNA polymerase III subunit RPC3 OS=Candida albicans (strain SC5314 / ATCC MYA-2876) GN=RPC82 PE=3 SV=1	RPC3_CANAL	68 kDa	0	0	0	0	0	0
100	Nascent polypeptide-associated complex subunit alpha OS=Candida albicans (strain SC5314 / ATCC MYA-2876) GN=EGD2 PE=3 SV=1	NACA_CANAL	20 kDa	3	7	16	2	5	14
101	Polyadenylate-binding protein, cytoplasmic and nuclear OS=Candida albicans (strain SC5314 / ATCC MYA-2876) GN=PAB1 PE=3 SV=1	PABP_CANAL	70 kDa	0	2	24	1	6	0
102	Putative uncharacterized protein SGN12 OS=Candida albicans (strain SC5314 / ATCC MYA-2876) GN=SGN12 PE=4 SV=1	Q5AFH1_CANAL	21 kDa	11	9	7	12	4	4
103	Potential clathrin-associated protein AP-1 complex component OS=Candida albicans (strain SC5314 / ATCC MYA-2876) GN=APM1 PE=4 SV=1	Q5AJY4_CANAL	50 kDa	0	3	0	0	0	1
104	Cytochrome c OS=Candida albicans (strain SC5314 / ATCC MYA-2876) GN=CYC1 PE=3 SV=3	CYC_CANAL	12 kDa	5	6	7	12	6	8
105	Likely HSP70/BiP chaperone OS=Candida albicans (strain SC5314 / ATCC MYA-2876) GN=KAR2 PE=3 SV=1	Q5AD54_CANAL (+1)	75 kDa	0	8	21	0	7	7
106	Hexokinase-2 OS=Candida albicans (strain SC5314 / ATCC MYA-2876) GN=HXK2 PE=1 SV=2	HXKB_CANAL	53 kDa	0	0	30	0	1	5
107	S-adenosylmethionine synthase OS=Candida albicans (strain SC5314 / ATCC MYA-2876) GN=SAM2 PE=3 SV=1	Q59W67_CANAL	42 kDa	2	3	13	2	2	1
108	6-phosphogluconate dehydrogenase, decarboxylating OS=Candida albicans (strain SC5314 / ATCC MYA-2876) GN=GND1 PE=3 SV=1	Q5AKV3_CANAL	57 kDa	0	0	31	0	0	0
109	Phosphoglycerate mutase OS=Candida albicans (strain SC5314 / ATCC MYA-2876) GN=GPM1 PE=1 SV=3	PMGY_CANAL	27 kDa	0	2	29	0	1	1
110	Cluster of Putative uncharacterized protein SGN11 OS=Candida albicans (strain SC5314 / ATCC MYA-2876) GN=SGN11 PE=4 SV=1 (Q59YN8_CANAL)	Q59YN8_CANAL	19 kDa	4	6	4	5	3	4
110.1	Putative uncharacterized protein SGN11 OS=Candida albicans (strain SC5314 / ATCC MYA-2876) GN=SGN11 PE=4 SV=1	Q59YN8_CANAL	19 kDa	4	6	4	5	3	4
111	Heat shock protein homolog SSE1 OS=Candida albicans (strain SC5314 / ATCC MYA-2876) GN=MSI3 PE=1 SV=2	HSP7F_CANAL	79 kDa	0	0	23	0	0	0
112	Histone H4 OS=Candida albicans (strain SC5314 / ATCC MYA-2876) GN=HHF22 PE=3 SV=1	Q59VN4_CANAL	12 kDa	0	3	8	5	4	7
113	Putative uncharacterized protein OS=Candida albicans (strain SC5314 / ATCC MYA-2876) GN=CaO19.14175 PE=4 SV=1	Q59T31_CANAL	49 kDa	2	9	6	6	7	4
114	Putative uncharacterized protein OS=Candida albicans (strain SC5314 / ATCC MYA-2876) GN=CHS3 PE=4 SV=1	Q5AL40_CANAL	125 kDa	0	11	2	2	6	3
115	Putative uncharacterized protein KGD1 OS=Candida albicans (strain SC5314 / ATCC MYA-2876) GN=KGD1 PE=4 SV=1	Q59LN7_CANAL	112 kDa	0	1	16	2	0	0
116	Likely cytosolic ribosomal protein L19 OS=Candida albicans (strain SC5314 / ATCC MYA-2876) GN=RPL19A PE=4 SV=1	Q5ANJ7_CANAL	13 kDa	2	5	17	5	3	3
117	Potential transcriptional co-activator OS=Candida albicans (strain SC5314 / ATCC MYA-2876) GN=SWI6 PE=4 SV=1	Q5APP0_CANAL	83 kDa	0	0	0	5	5	9
118	Peroxiredoxin TSA1 OS=Candida albicans (strain SC5314 / ATCC MYA-2876) GN=TSA1 PE=2 SV=1	TSA1_CANAL	22 kDa	1	2	19	1	3	2
119	Non-histone chromosomal protein 6 OS=Candida albicans (strain SC5314 / ATCC MYA-2876) GN=NHP6 PE=3 SV=1	NHP6_CANAL	11 kDa	8	7	8	11	5	5
120	Transaldolase OS=Candida albicans (strain SC5314 / ATCC MYA-2876) GN=TAL1 PE=3 SV=1	Q5A017_CANAL	36 kDa	0	0	26	0	0	6
121	Putative uncharacterized protein THO1 OS=Candida albicans (strain SC5314 / ATCC MYA-2876) GN=THO1 PE=4 SV=1	Q59SE5_CANAL	22 kDa	7	7	5	9	8	8
122	Cluster of Putative uncharacterized protein OS=Candida albicans (strain SC5314 / ATCC MYA-2876) GN=CaO19.3475 PE=4 SV=1 (Q59S65_CANAL)	Q59S65_CANAL [2]	20 kDa	5	5	8	7	4	6
122.1	Putative uncharacterized protein OS=Candida albicans (strain SC5314 / ATCC MYA-2876) GN=CaO19.3475 PE=4 SV=1	Q59S65_CANAL	20 kDa	4	4	7	6	3	5
122.2	Putative uncharacterized protein OS=Candida albicans (strain SC5314 / ATCC MYA-2876) GN=CaO19.10979 PE=4 SV=1	Q59S96_CANAL	20 kDa	4	4	7	5	3	5
123	Putative uncharacterized protein ATP4 OS=Candida albicans (strain SC5314 / ATCC MYA-2876) GN=ATP4 PE=4 SV=1	Q59ZE0_CANAL	26 kDa	0	4	7	2	4	10
124	5-methyltetrahydropteroyltriglutamate--homocysteine methyltransferase OS=Candida albicans (strain SC5314 / ATCC MYA-2876) GN=MET6 PE=1 SV=2	METE_CANAL	86 kDa	0	0	33	0	0	0
125	Cluster of Histone H2A.2 OS=Candida albicans (strain SC5314 / ATCC MYA-2876) GN=HTA2 PE=3 SV=3 (H2A2_CANAL)	H2A2_CANAL [2]	14 kDa	0	5	8	4	3	9
125.1	Histone H2A.2 OS=Candida albicans (strain SC5314 / ATCC MYA-2876) GN=HTA2 PE=3 SV=3	H2A2_CANAL	14 kDa	0	4	6	3	3	8
125.2	Histone H2A.1 OS=Candida albicans (strain SC5314 / ATCC MYA-2876) GN=HTA1 PE=3 SV=3	H2A1_CANAL	14 kDa	0	4	6	2	0	8
126	Nascent polypeptide-associated complex subunit beta OS=Candida albicans (strain SC5314 / ATCC MYA-2876) GN=EGD1 PE=3 SV=1	NACB_CANAL	17 kDa	2	4	7	3	4	10
127	Putative uncharacterized protein OS=Candida albicans (strain SC5314 / ATCC MYA-2876) GN=CaO19.1658 PE=4 SV=1	Q5AJD3_CANAL	38 kDa	3	12	3	9	4	4
128	Glucose-6-phosphate isomerase OS=Candida albicans (strain SC5314 / ATCC MYA-2876) GN=PGI1 PE=1 SV=2	G6PI_CANAL	61 kDa	0	0	27	0	0	2
129	Putative uncharacterized protein ATP7 OS=Candida albicans (strain SC5314 / ATCC MYA-2876) GN=ATP7 PE=4 SV=1	Q59PV8_CANAL	19 kDa	1	3	8	1	4	12
130	Possible mitochondrial HMG-like protein OS=Candida albicans (strain SC5314 / ATCC MYA-2876) GN=GCF1 PE=4 SV=1	Q59QB8_CANAL	28 kDa	0	0	3	4	1	5
131	Putative uncharacterized protein OS=Candida albicans (strain SC5314 / ATCC MYA-2876) GN=FUN12 PE=4 SV=1	Q5A782_CANAL	113 kDa	0	7	11	3	6	1
132	Cytochrome b-c1 complex subunit 7 OS=Candida albicans (strain SC5314 / ATCC MYA-2876) GN=QCR7 PE=3 SV=1	Q5ABS1_CANAL	14 kDa	0	4	9	0	2	7
133	6-phosphofructokinase OS=Candida albicans (strain SC5314 / ATCC MYA-2876) GN=PFK2 PE=3 SV=1	Q5AGZ8_CANAL	104 kDa	0	0	23	0	0	1
134	Aminopeptidase 2 OS=Candida albicans (strain SC5314 / ATCC MYA-2876) GN=APE2 PE=1 SV=2	APE2_CANAL	104 kDa	0	0	30	0	0	0
135	Adenosylhomocysteinase OS=Candida albicans (strain SC5314 / ATCC MYA-2876) GN=SAH1 PE=1 SV=2	SAHH_CANAL	49 kDa	0	2	22	0	0	3
136	Probable DnaJ-like heat-shock protein OS=Candida albicans (strain SC5314 / ATCC MYA-2876) GN=YDJ1 PE=3 SV=1	Q5A6Z6_CANAL	43 kDa	0	5	12	0	5	4
137	Transketolase OS=Candida albicans (strain SC5314 / ATCC MYA-2876) GN=TKL1 PE=3 SV=1	Q5A750_CANAL	74 kDa	0	0	23	0	0	1
138	FK506-binding protein 3 OS=Candida albicans (strain SC5314 / ATCC MYA-2876) GN=FPR3 PE=3 SV=1	FKBP3_CANAL	48 kDa	1	9	8	3	5	4
139	Peptidyl-prolyl cis-trans isomerase OS=Candida albicans (strain SC5314 / ATCC MYA-2876) GN=CYP1 PE=1 SV=1	PPIA_CANAL	18 kDa	0	6	24	0	4	7
140	Triosephosphate isomerase OS=Candida albicans (strain SC5314 / ATCC MYA-2876) GN=TPI1 PE=1 SV=3	TPIS_CANAL	27 kDa	0	1	19	0	1	4
141	Potential translation elongation factor Cam1p OS=Candida albicans (strain SC5314 / ATCC MYA-2876) GN=CAM1-1 PE=4 SV=1	Q59QS2_CANAL	48 kDa	0	0	21	0	0	2
142	Putative uncharacterized protein PSP2 OS=Candida albicans (strain SC5314 / ATCC MYA-2876) GN=PSP2 PE=4 SV=1	Q5AJG3_CANAL	81 kDa	0	14	1	7	5	4
143	Likely translation initiation factor eIF2 gamma subunit OS=Candida albicans (strain SC5314 / ATCC MYA-2876) GN=GCD11 PE=4 SV=1	Q5AGF6_CANAL	59 kDa	0	7	11	0	4	1
144	6-phosphofructokinase OS=Candida albicans (strain SC5314 / ATCC MYA-2876) GN=PFK1 PE=3 SV=1	Q5AK53_CANAL	109 kDa	0	0	21	0	0	0
145	Potential nuclear localization sequence binding protein Nsr1p OS=Candida albicans (strain SC5314 / ATCC MYA-2876) GN=NSR1 PE=4 SV=1	Q5AB84_CANAL	44 kDa	0	6	7	4	6	4
146	Putative uncharacterized protein BFR1 OS=Candida albicans (strain SC5314 / ATCC MYA-2876) GN=BFR1 PE=4 SV=1	Q5AMT7_CANAL	53 kDa	0	5	10	1	3	2
147	Putative uncharacterized protein OS=Candida albicans (strain SC5314 / ATCC MYA-2876) GN=CaO19.8737 PE=4 SV=1	Q59TY8_CANAL-DECOY	?	0	0	0	0	0	1
148	E3 ubiquitin-protein ligase BRE1 OS=Candida albicans (strain SC5314 / ATCC MYA-2876) GN=BRE1 PE=3 SV=1	BRE1_CANAL	79 kDa	0	14	4	0	10	3
149	Cluster of Likely translation initiation factor subunit eIF4G OS=Candida albicans (strain SC5314 / ATCC MYA-2876) GN=TIF4631 PE=4 SV=1 (Q59Y54_CANAL)	Q59Y54_CANAL [3]	118 kDa	0	6	4	0	0	0
149.1	Likely translation initiation factor subunit eIF4G OS=Candida albicans (strain SC5314 / ATCC MYA-2876) GN=TIF4631 PE=4 SV=1	Q59Y54_CANAL	118 kDa	0	6	4	0	0	0
149.2	Likely translation initiation factor subunit eIF4G OS=Candida albicans (strain SC5314 / ATCC MYA-2876) GN=TIF46 PE=4 SV=1	Q59YB0_CANAL	68 kDa	0	0	0	0	0	0
149.3	Likely translation initiation factor subunit eIF4G OS=Candida albicans (strain SC5314 / ATCC MYA-2876) GN=TIF4631 PE=4 SV=1	Q59YA6_CANAL	57 kDa	0	0	0	0	0	0
150	Chitin synthase Chs2p OS=Candida albicans (strain SC5314 / ATCC MYA-2876) GN=CHS2 PE=4 SV=1	Q5A409_CANAL	116 kDa	0	5	1	3	5	3
151	Putative uncharacterized protein CDC48 OS=Candida albicans (strain SC5314 / ATCC MYA-2876) GN=CDC48 PE=4 SV=1	Q59WG3_CANAL	91 kDa	0	0	16	0	0	1
152	Cytoplasmic dynein heavy chain OS=Candida albicans (strain SC5314 / ATCC MYA-2876) GN=DYN1 PE=4 SV=1	Q5ANA6_CANAL	479 kDa	0	0	0	0	0	2
153	Likely glutamate synthase OS=Candida albicans (strain SC5314 / ATCC MYA-2876) GN=GLT1 PE=4 SV=1	Q5AAQ5_CANAL (+1)	235 kDa	0	2	2	0	0	1
154	14-3-3 protein homolog OS=Candida albicans (strain SC5314 / ATCC MYA-2876) GN=BMH1 PE=1 SV=2	1433_CANAL	29 kDa	0	1	12	0	4	4
155	Uncharacterized protein OS=Candida albicans (strain SC5314 / ATCC MYA-2876) GN=ERG13 PE=4 SV=1	Q5A3Z7_CANAL	50 kDa	0	3	11	0	1	4
156	Cytochrome c oxidase subunit 6A, mitochondrial OS=Candida albicans (strain SC5314 / ATCC MYA-2876) GN=COX13 PE=3 SV=1	Q5ALV9_CANAL	16 kDa	0	3	7	2	1	3
157	Cluster of Potential hexose transporter OS=Candida albicans (strain SC5314 / ATCC MYA-2876) GN=HGT7 PE=3 SV=1 (Q5AD44_CANAL)	Q5AD44_CANAL [2]	61 kDa	0	4	4	0	0	4
157.1	Potential hexose transporter OS=Candida albicans (strain SC5314 / ATCC MYA-2876) GN=HGT7 PE=3 SV=1	Q5AD44_CANAL	61 kDa	0	4	4	0	0	4
157.2	Potential hexose transporter OS=Candida albicans (strain SC5314 / ATCC MYA-2876) GN=HGT6 PE=3 SV=1	Q5AD47_CANAL	62 kDa	0	0	0	0	0	0
158	Putative uncharacterized protein ADE17 OS=Candida albicans (strain SC5314 / ATCC MYA-2876) GN=ADE17 PE=4 SV=1	Q5A6R2_CANAL	65 kDa	0	0	29	0	0	0
159	Malate dehydrogenase OS=Candida albicans (strain SC5314 / ATCC MYA-2876) GN=MDH1-1 PE=3 SV=1	Q5AMP4_CANAL	35 kDa	0	0	20	0	0	3
160	Cluster of Putative uncharacterized protein (Fragment) OS=Candida albicans (strain SC5314 / ATCC MYA-2876) GN=CaO19.2296 PE=4 SV=1 (Q59WK5_CANAL)	Q59WK5_CANAL [2]	136 kDa	0	5	7	0	5	7
160.1	Putative uncharacterized protein (Fragment) OS=Candida albicans (strain SC5314 / ATCC MYA-2876) GN=CaO19.2296 PE=4 SV=1	Q59WK5_CANAL	136 kDa	0	5	7	0	5	7
160.2	Putative uncharacterized protein (Fragment) OS=Candida albicans (strain SC5314 / ATCC MYA-2876) GN=CaO19.9831 PE=4 SV=1	Q59WR4_CANAL	136 kDa	0	4	0	0	4	6
161	Potential HMG-like DNA binding protein Hmo1p OS=Candida albicans (strain SC5314 / ATCC MYA-2876) GN=HMO1 PE=4 SV=1	Q59PR9_CANAL	25 kDa	0	3	5	0	2	4
162	Putative uncharacterized protein SSZ1 OS=Candida albicans (strain SC5314 / ATCC MYA-2876) GN=SSZ1 PE=3 SV=1	Q5A678_CANAL	59 kDa	0	1	16	0	0	0
163	Elongation factor Tu OS=Candida albicans (strain SC5314 / ATCC MYA-2876) GN=TUF1 PE=3 SV=1	Q5ABC3_CANAL	47 kDa	0	1	9	0	2	0
164	Protein ROT1 OS=Candida albicans (strain SC5314 / ATCC MYA-2876) GN=ROT1 PE=3 SV=1	ROT1_CANAL	30 kDa	0	4	6	1	7	5
165	Transcription elongation factor SPT5 OS=Candida albicans (strain SC5314 / ATCC MYA-2876) GN=SPT5 PE=3 SV=1	SPT5_CANAL	106 kDa	1	6	2	1	1	2
166	Cluster of Possible de-ubiquitination complex subunit Bre5p OS=Candida albicans (strain SC5314 / ATCC MYA-2876) GN=BRE5 PE=4 SV=1 (Q59QX3_CANAL)	Q59QX3_CANAL [2]	67 kDa	0	3	7	0	0	4
166.1	Possible de-ubiquitination complex subunit Bre5p OS=Candida albicans (strain SC5314 / ATCC MYA-2876) GN=BRE5 PE=4 SV=1	Q59QX3_CANAL	67 kDa	0	3	6	0	0	4
166.2	Possible de-ubiquitination complex subunit Bre5p OS=Candida albicans (strain SC5314 / ATCC MYA-2876) GN=BRE5 PE=4 SV=1	Q59QZ9_CANAL	67 kDa	0	0	6	0	0	4
167	Likely mitochondrial ketol-acid reductoisomerase OS=Candida albicans (strain SC5314 / ATCC MYA-2876) GN=ILV5 PE=4 SV=1	Q59WW5_CANAL	45 kDa	0	0	18	0	0	2
168	Putative uncharacterized protein IDH2 OS=Candida albicans (strain SC5314 / ATCC MYA-2876) GN=IDH2 PE=3 SV=1	Q5A0M1_CANAL	40 kDa	0	1	13	0	0	3
169	Likely protein disulfide isomerase OS=Candida albicans (strain SC5314 / ATCC MYA-2876) GN=PDI1 PE=4 SV=1	Q5A5F2_CANAL	63 kDa	0	1	11	0	1	1
170	Nucleoside diphosphate kinase OS=Candida albicans (strain SC5314 / ATCC MYA-2876) GN=YNK1 PE=3 SV=1	Q5AG68_CANAL	17 kDa	0	1	17	0	1	3
171	Cluster of ATP synthase subunit gamma OS=Candida albicans (strain SC5314 / ATCC MYA-2876) GN=ATP3 PE=3 SV=1 (Q5A8A4_CANAL)	Q5A8A4_CANAL [2]	29 kDa	0	2	11	0	1	3
171.1	ATP synthase subunit gamma OS=Candida albicans (strain SC5314 / ATCC MYA-2876) GN=ATP3 PE=3 SV=1	Q5A8A4_CANAL	29 kDa	0	2	10	0	1	3
171.2	Likely F1-ATP synthase gamma subunit Atp3 OS=Candida albicans (strain SC5314 / ATCC MYA-2876) GN=CaO19.3223 PE=4 SV=1	Q5A8H1_CANAL	17 kDa	0	0	5	0	0	0
172	Inorganic pyrophosphatase OS=Candida albicans (strain SC5314 / ATCC MYA-2876) GN=IPP1 PE=1 SV=2	IPYR_CANAL	32 kDa	0	4	21	0	0	1
173	Probable Isoleucyl-tRNA synthetase OS=Candida albicans (strain SC5314 / ATCC MYA-2876) GN=ILS1 PE=3 SV=1	Q59RI1_CANAL	125 kDa	0	0	19	0	0	0
174	Putative uncharacterized protein OS=Candida albicans (strain SC5314 / ATCC MYA-2876) GN=CaO19.4959 PE=4 SV=1	Q5AL18_CANAL (+1)	64 kDa	0	0	1	2	1	5
175	Midasin OS=Candida albicans (strain SC5314 / ATCC MYA-2876) GN=MDN1 PE=3 SV=1	Q5AMF4_CANAL	573 kDa	0	0	0	0	0	1
176	Putative uncharacterized protein OS=Candida albicans (strain SC5314 / ATCC MYA-2876) GN=CaO19.1240 PE=4 SV=1	Q5A4C1_CANAL-DECOY	?	0	0	0	0	0	0
177	Putative uncharacterized protein OS=Candida albicans (strain SC5314 / ATCC MYA-2876) GN=CaO19.14110 PE=4 SV=1	Q5ADM3_CANAL-DECOY	?	0	0	0	0	0	1
178	Putative uncharacterized protein COX5 OS=Candida albicans (strain SC5314 / ATCC MYA-2876) GN=COX5 PE=4 SV=1	Q5APK5_CANAL	19 kDa	0	5	7	0	3	5
179	Potential mitochondrial Complex I, 21/29 kd subunit OS=Candida albicans (strain SC5314 / ATCC MYA-2876) GN=CaO19.287 PE=4 SV=1	Q5AEI1_CANAL	22 kDa	3	5	6	3	1	5
180	Potential single-stranded nucleic acid binding protein OS=Candida albicans (strain SC5314 / ATCC MYA-2876) GN=SBP1 PE=4 SV=1	Q5ANP6_CANAL	32 kDa	0	4	6	3	3	4
181	Acetyl-coenzyme A synthetase 2 OS=Candida albicans (strain SC5314 / ATCC MYA-2876) GN=ACS2 PE=3 SV=2	ACS2_CANAL	74 kDa	0	0	21	0	0	0
182	Putative uncharacterized protein NUP120 OS=Candida albicans (strain SC5314 / ATCC MYA-2876) GN=NUP120 PE=4 SV=1	Q5AML9_CANAL	128 kDa	0	2	0	0	0	0
183	Putative uncharacterized protein OS=Candida albicans (strain SC5314 / ATCC MYA-2876) GN=CaO19.11979 PE=4 SV=1	Q59TC7_CANAL (+1)	25 kDa	1	5	3	4	2	7
184	Cell surface protein OS=Candida albicans (strain SC5314 / ATCC MYA-2876) GN=CSP37 PE=4 SV=1	Q5A9D4_CANAL	37 kDa	0	3	3	0	4	4
185	Potential DNA binding protein OS=Candida albicans (strain SC5314 / ATCC MYA-2876) GN=EFH1 PE=4 SV=1	Q59P39_CANAL	81 kDa	0	0	0	0	0	0
186	Eukaryotic translation initiation factor 3 subunit C OS=Candida albicans (strain SC5314 / ATCC MYA-2876) GN=NIP1 PE=3 SV=1	EIF3C_CANAL	100 kDa	0	2	13	0	2	0
187	Putative uncharacterized protein WWM1 OS=Candida albicans (strain SC5314 / ATCC MYA-2876) GN=WWM1 PE=4 SV=1	Q59PA2_CANAL	27 kDa	11	5	1	11	3	3
188	DNA-directed RNA polymerase OS=Candida albicans (strain SC5314 / ATCC MYA-2876) GN=RPO41 PE=3 SV=1	Q5ABC9_CANAL	148 kDa	0	0	1	2	1	0
189	Potential alkyl hydroperoxide reductase OS=Candida albicans (strain SC5314 / ATCC MYA-2876) GN=AHP1 PE=4 SV=1	Q5AF44_CANAL	19 kDa	0	5	11	1	3	7
190	Putative uncharacterized protein SUP45 OS=Candida albicans (strain SC5314 / ATCC MYA-2876) GN=ERF1 PE=4 SV=1	Q59ZH8_CANAL	49 kDa	0	3	5	0	3	2
191	Cluster of Possible mitochondrial ribosomal large subunit protein MRP51p OS=Candida albicans (strain SC5314 / ATCC MYA-2876) GN=MRP51 PE=4 SV=1 (Q59LM8_CANAL)	Q59LM8_CANAL [2]	41 kDa	0	0	4	0	1	4
191.1	Possible mitochondrial ribosomal large subunit protein MRP51p OS=Candida albicans (strain SC5314 / ATCC MYA-2876) GN=MRP51 PE=4 SV=1	Q59LM8_CANAL	41 kDa	0	0	4	0	0	4
191.2	Possible mitochondrial ribosomal large subunit protein MRP51p OS=Candida albicans (strain SC5314 / ATCC MYA-2876) GN=MRP51 PE=4 SV=1	Q59LL3_CANAL	41 kDa	0	0	0	0	1	3
192	Pre-rRNA-processing protein ESF2 OS=Candida albicans (strain SC5314 / ATCC MYA-2876) GN=ESF2 PE=3 SV=2	ESF2_CANAL	37 kDa	0	8	5	0	5	3
193	Putative uncharacterized protein KGD2 OS=Candida albicans (strain SC5314 / ATCC MYA-2876) GN=KGD2 PE=3 SV=1	Q59RQ8_CANAL	48 kDa	0	2	9	0	4	3
194	Putative uncharacterized protein GFA1 OS=Candida albicans (strain SC5314 / ATCC MYA-2876) GN=GFA1 PE=4 SV=1	Q5AJH4_CANAL	79 kDa	0	0	4	0	0	0
195	Virulence protein SSD1 OS=Candida albicans (strain SC5314 / ATCC MYA-2876) GN=SSD1 PE=2 SV=1	SSD1_CANAL	141 kDa	0	5	3	0	2	1
196	Probable valyl-tRNA synthetase OS=Candida albicans (strain SC5314 / ATCC MYA-2876) GN=VAS1 PE=3 SV=1	Q59JY1_CANAL	128 kDa	0	0	19	0	0	0
197	Putative uncharacterized protein OS=Candida albicans (strain SC5314 / ATCC MYA-2876) GN=CaO19.754 PE=3 SV=1	Q59VH9_CANAL	44 kDa	0	0	19	0	0	0
198	Putative uncharacterized protein ALD99 OS=Candida albicans (strain SC5314 / ATCC MYA-2876) GN=ALD5 PE=3 SV=1	Q5A0K5_CANAL	54 kDa	0	0	17	0	0	1
199	Cluster of Putative uncharacterized protein HSP12 OS=Candida albicans (strain SC5314 / ATCC MYA-2876) GN=HSP12 PE=4 SV=1 (Q59YM0_CANAL)	Q59YM0_CANAL [2]	18 kDa	0	4	9	0	3	6
199.1	Putative uncharacterized protein HSP12 OS=Candida albicans (strain SC5314 / ATCC MYA-2876) GN=HSP12 PE=4 SV=1	Q59YM0_CANAL	18 kDa	0	0	8	0	0	5
199.2	Putative uncharacterized protein HSP12 OS=Candida albicans (strain SC5314 / ATCC MYA-2876) GN=HSP12 PE=4 SV=1	Q5AGU9_CANAL	18 kDa	0	4	8	0	3	5
200	Possible sphingolipid long chain base sensory protein OS=Candida albicans (strain SC5314 / ATCC MYA-2876) GN=PIL1 PE=4 SV=1	Q59VF6_CANAL	35 kDa	0	0	10	0	1	2
201	Putative uncharacterized protein KAP123 OS=Candida albicans (strain SC5314 / ATCC MYA-2876) GN=KAP123 PE=4 SV=1	Q5A9Z5_CANAL	122 kDa	0	0	19	0	0	0
202	Putative uncharacterized protein OS=Candida albicans (strain SC5314 / ATCC MYA-2876) GN=SLK19 PE=4 SV=1	Q5ADT0_CANAL	134 kDa	0	1	5	0	0	2
203	Putative uncharacterized protein PDX1 OS=Candida albicans (strain SC5314 / ATCC MYA-2876) GN=PDX1 PE=4 SV=1	Q5AKV6_CANAL	46 kDa	0	3	6	1	1	3
204	Putative uncharacterized protein PWP1 OS=Candida albicans (strain SC5314 / ATCC MYA-2876) GN=PWP1 PE=4 SV=1	Q5AMK6_CANAL (+1)	59 kDa	0	12	7	0	3	2
205	Aspartate transcarbamylase OS=Candida albicans (strain SC5314 / ATCC MYA-2876) GN=URA2 PE=3 SV=1	Q59SN3_CANAL-DECOY (+1)	?	0	0	0	0	0	0
206	Fatty acid synthetase beta subunit OS=Candida albicans (strain SC5314 / ATCC MYA-2876) GN=FAS1 PE=4 SV=1	Q5A4W7_CANAL-DECOY	?	0	0	0	0	0	0
207	Cap-associated protein CAF20 OS=Candida albicans (strain SC5314 / ATCC MYA-2876) GN=CAF20 PE=3 SV=1	CAF20_CANAL	20 kDa	1	3	2	5	2	2
208	Possible bud neck localizing protein phosphatase subunit Bni4p OS=Candida albicans (strain SC5314 / ATCC MYA-2876) GN=BNI4 PE=4 SV=1	Q59QJ2_CANAL-DECOY	?	0	0	0	0	0	0
209	Cluster of Putative uncharacterized protein SDH1 OS=Candida albicans (strain SC5314 / ATCC MYA-2876) GN=SDH12 PE=4 SV=1 (Q5A1E8_CANAL)	Q5A1E8_CANAL	70 kDa	0	0	8	0	1	0
209.1	Putative uncharacterized protein SDH1 OS=Candida albicans (strain SC5314 / ATCC MYA-2876) GN=SDH12 PE=4 SV=1	Q5A1E8_CANAL	70 kDa	0	0	8	0	1	0
210	Possible sphingolipid long chain base sensory protein OS=Candida albicans (strain SC5314 / ATCC MYA-2876) GN=LSP1 PE=4 SV=1	Q59KV8_CANAL	36 kDa	0	2	14	0	2	5
211	Putative uncharacterized protein CBF5 OS=Candida albicans (strain SC5314 / ATCC MYA-2876) GN=CBF5 PE=4 SV=1	Q5A4Y4_CANAL	20 kDa	2	4	5	3	2	5
212	Putative uncharacterized protein CLC1 OS=Candida albicans (strain SC5314 / ATCC MYA-2876) GN=CLC1 PE=4 SV=1	Q5AMQ2_CANAL	26 kDa	0	1	6	1	1	3
213	Potential clathrin-associated protein AP-2 complex component OS=Candida albicans (strain SC5314 / ATCC MYA-2876) GN=APL1 PE=4 SV=1	Q59ZX9_CANAL-DECOY	?	0	0	0	0	0	0
214	Likely histidine kinase osmosensor and regulator Chk1p OS=Candida albicans (strain SC5314 / ATCC MYA-2876) GN=CHK1 PE=4 SV=1	Q5AHA0_CANAL	282 kDa	0	1	0	0	0	0
215	Potential mitochondrial Complex I, PGIV_19kd subunit OS=Candida albicans (strain SC5314 / ATCC MYA-2876) GN=CaO19.10339 PE=4 SV=1	Q5A222_CANAL	20 kDa	1	2	7	2	0	4
216	Putative uncharacterized protein HSH155 OS=Candida albicans (strain SC5314 / ATCC MYA-2876) GN=HSH155 PE=4 SV=1	Q5AFD2_CANAL	125 kDa	0	1	0	0	0	2
217	Putative uncharacterized protein KEL2 OS=Candida albicans (strain SC5314 / ATCC MYA-2876) GN=KEL1 PE=4 SV=1	Q5AB80_CANAL-DECOY	?	0	2	0	0	0	0
218	Putative uncharacterized protein VMA6 OS=Candida albicans (strain SC5314 / ATCC MYA-2876) GN=VMA6 PE=4 SV=1	Q59KU5_CANAL	40 kDa	0	4	6	0	3	3
219	Likely mitochondrial ribosomal protein MRPL28p OS=Candida albicans (strain SC5314 / ATCC MYA-2876) GN=MRPL28 PE=4 SV=1	Q59QC1_CANAL	17 kDa	1	2	4	3	2	4
220	Serine/threonine-protein kinase MEC1 OS=Candida albicans (strain SC5314 / ATCC MYA-2876) GN=MEC1 PE=3 SV=1	ATR_CANAL	267 kDa	0	0	0	0	0	0
221	Putative uncharacterized protein OS=Candida albicans (strain SC5314 / ATCC MYA-2876) GN=CaO19.14143 PE=4 SV=1	Q59RA9_CANAL	39 kDa	0	2	8	0	3	4
222	Likely C1-tetrahydrofolate synthase OS=Candida albicans (strain SC5314 / ATCC MYA-2876) GN=MIS11 PE=3 SV=1	Q59SM8_CANAL	102 kDa	0	0	18	0	0	0
223	Putative uncharacterized protein OS=Candida albicans (strain SC5314 / ATCC MYA-2876) GN=NUP60 PE=4 SV=1	Q5A1B9_CANAL	68 kDa	1	8	1	1	1	0
224	Putative uncharacterized protein NDT801 OS=Candida albicans (strain SC5314 / ATCC MYA-2876) GN=NDT80 PE=4 SV=1	Q5ACU9_CANAL	58 kDa	0	0	0	2	1	5
225	Putative uncharacterized protein TIF5 OS=Candida albicans (strain SC5314 / ATCC MYA-2876) GN=TIF5 PE=4 SV=1	Q5AGB9_CANAL	47 kDa	0	0	5	0	0	3
226	Likely mitochondrial ribosomal protein MRPL27p OS=Candida albicans (strain SC5314 / ATCC MYA-2876) GN=MRPL27 PE=4 SV=1	Q5AHY8_CANAL	19 kDa	0	1	4	0	0	1
227	Putative uncharacterized protein OS=Candida albicans (strain SC5314 / ATCC MYA-2876) GN=CaO19.13111 PE=4 SV=1	Q59UQ4_CANAL	17 kDa	1	4	3	5	1	3
228	Putative uncharacterized protein XYL2 OS=Candida albicans (strain SC5314 / ATCC MYA-2876) GN=XYL2 PE=3 SV=1	Q5ACG6_CANAL	39 kDa	0	1	10	0	0	0
229	Putative uncharacterized protein MYO2 OS=Candida albicans (strain SC5314 / ATCC MYA-2876) GN=MYO2 PE=4 SV=1	Q5AKW2_CANAL	179 kDa	0	0	4	1	0	0
230	Putative uncharacterized protein MOT1 OS=Candida albicans (strain SC5314 / ATCC MYA-2876) GN=MOT1 PE=4 SV=1	Q59TC9_CANAL	214 kDa	0	0	0	0	0	0
231	Putative uncharacterized protein HMG1 OS=Candida albicans (strain SC5314 / ATCC MYA-2876) GN=HMG1 PE=3 SV=1	Q59VR2_CANAL-DECOY	?	0	2	0	0	1	0
232	Cluster of Potential aspartate aminotransferase OS=Candida albicans (strain SC5314 / ATCC MYA-2876) GN=AAT21 PE=4 SV=1 (Q59X81_CANAL)	Q59X81_CANAL [2]	68 kDa	0	3	3	0	3	8
232.1	Potential aspartate aminotransferase OS=Candida albicans (strain SC5314 / ATCC MYA-2876) GN=AAT21 PE=4 SV=1	Q59X81_CANAL	68 kDa	0	3	3	0	3	8
232.2	Potential aspartate aminotransferase OS=Candida albicans (strain SC5314 / ATCC MYA-2876) GN=AAT21 PE=4 SV=1	Q59XC8_CANAL	63 kDa	0	0	0	0	0	8
233	Eukaryotic translation initiation factor 4E OS=Candida albicans (strain SC5314 / ATCC MYA-2876) GN=TIF45 PE=3 SV=1	IF4E_CANAL	24 kDa	0	2	7	1	4	1
234	Likely mitochondrial ribosomal protein MRPL36p OS=Candida albicans (strain SC5314 / ATCC MYA-2876) GN=MRPL36 PE=4 SV=1	Q59YH5_CANAL	24 kDa	2	2	3	5	0	5
235	Putative uncharacterized protein EFB1 OS=Candida albicans (strain SC5314 / ATCC MYA-2876) GN=EFB1 PE=3 SV=1	Q5A652_CANAL	26 kDa	0	0	7	1	0	1
236	Putative uncharacterized protein OS=Candida albicans (strain SC5314 / ATCC MYA-2876) GN=CaO19.13050 PE=4 SV=1	Q5AC67_CANAL	37 kDa	0	0	1	0	1	2
237	Alanine--tRNA ligase OS=Candida albicans (strain SC5314 / ATCC MYA-2876) GN=ALA1 PE=1 SV=1	SYA_CANAL	?	0	0	18	0	0	0
238	Transcriptional regulator DEF1 OS=Candida albicans (strain SC5314 / ATCC MYA-2876) GN=DEF1 PE=2 SV=1	EED1_CANAL-DECOY	?	0	0	0	0	0	0
239	Adenylate kinase OS=Candida albicans (strain SC5314 / ATCC MYA-2876) GN=ADK1 PE=3 SV=2	KAD2_CANAL	28 kDa	0	1	6	0	0	3
240	ATP-dependent RNA helicase SUV3, mitochondrial OS=Candida albicans (strain SC5314 / ATCC MYA-2876) GN=SUV3 PE=3 SV=1	SUV3_CANAL-DECOY	?	0	1	0	0	0	0
241	Likely small subunit rRNA processing protein OS=Candida albicans (strain SC5314 / ATCC MYA-2876) GN=RRP7 PE=4 SV=1	Q5A0H6_CANAL-DECOY	?	0	0	0	0	0	0
242	Putative uncharacterized protein OS=Candida albicans (strain SC5314 / ATCC MYA-2876) GN=CaO19.6160 PE=4 SV=1	Q59LP4_CANAL	90 kDa	0	0	3	0	1	4
243	ATP-binding cassette protein OS=Candida albicans (strain SC5314 / ATCC MYA-2876) GN=KRE30 PE=4 SV=1	Q5A2T2_CANAL	68 kDa	0	1	11	0	0	1
244	Potential DL-glycerol-3-phosphatase OS=Candida albicans (strain SC5314 / ATCC MYA-2876) GN=RHR2 PE=4 SV=1	Q5A7M9_CANAL	28 kDa	0	2	9	0	0	1
245	Cluster of Isocitrate dehydrogenase [NADP] OS=Candida albicans (strain SC5314 / ATCC MYA-2876) GN=IDP1 PE=3 SV=1 (Q59MF7_CANAL)	Q59MF7_CANAL [2]	49 kDa	0	0	5	0	0	0
245.1	Isocitrate dehydrogenase [NADP] OS=Candida albicans (strain SC5314 / ATCC MYA-2876) GN=IDP1 PE=3 SV=1	Q59MF7_CANAL	49 kDa	0	0	5	0	0	0
245.2	Isocitrate dehydrogenase [NADP] OS=Candida albicans (strain SC5314 / ATCC MYA-2876) GN=IDP2 PE=3 SV=1	Q59V07_CANAL	46 kDa	0	0	0	0	0	0
246	Citrate synthase OS=Candida albicans (strain SC5314 / ATCC MYA-2876) GN=CIT1 PE=3 SV=1	Q59ZZ5_CANAL	44 kDa	0	0	13	0	0	0
247	Putative uncharacterized protein ATP16 OS=Candida albicans (strain SC5314 / ATCC MYA-2876) GN=ATP16 PE=3 SV=1	Q5ACG5_CANAL	18 kDa	0	2	4	0	3	4
248	Putative uncharacterized protein OS=Candida albicans (strain SC5314 / ATCC MYA-2876) GN=CaO19.7011 PE=4 SV=1	Q5AFQ7_CANAL	136 kDa	1	3	3	2	1	2
249	RNAse L inhibitor-type ATP binding cassette protein OS=Candida albicans (strain SC5314 / ATCC MYA-2876) GN=RLI1 PE=4 SV=1	Q5AI20_CANAL	70 kDa	0	0	11	0	0	0
250	Putative uncharacterized protein DAK2 OS=Candida albicans (strain SC5314 / ATCC MYA-2876) GN=DAK2 PE=4 SV=1	Q5API7_CANAL	65 kDa	0	0	16	0	0	0
251	FACT complex subunit SPT16 OS=Candida albicans (strain SC5314 / ATCC MYA-2876) GN=SPT16 PE=3 SV=1	SPT16_CANAL	121 kDa	0	8	3	0	0	1
252	Putative uncharacterized protein OS=Candida albicans (strain SC5314 / ATCC MYA-2876) GN=CaO19.7154 PE=4 SV=1	Q5A0E1_CANAL	62 kDa	0	0	0	0	0	0
253	Putative uncharacterized protein OS=Candida albicans (strain SC5314 / ATCC MYA-2876) GN=CaO19.13687 PE=4 SV=1	Q59N02_CANAL-DECOY	?	0	0	0	0	0	0
254	Putative uncharacterized protein OS=Candida albicans (strain SC5314 / ATCC MYA-2876) GN=CaO19.13493 PE=4 SV=1	Q5AB98_CANAL	51 kDa	0	1	0	0	0	0
255	Cluster of Serine hydroxymethyltransferase OS=Candida albicans (strain SC5314 / ATCC MYA-2876) GN=SHM1 PE=3 SV=1 (Q59PP7_CANAL)	Q59PP7_CANAL [2]	54 kDa	0	0	8	0	0	0
255.1	Serine hydroxymethyltransferase OS=Candida albicans (strain SC5314 / ATCC MYA-2876) GN=SHM1 PE=3 SV=1	Q59PP7_CANAL	54 kDa	0	0	8	0	0	0
255.2	Serine hydroxymethyltransferase OS=Candida albicans (strain SC5314 / ATCC MYA-2876) GN=SHM1 PE=3 SV=1	Q59PM9_CANAL	54 kDa	0	0	8	0	0	0
256	Eukaryotic translation initiation factor 3 subunit B OS=Candida albicans (strain SC5314 / ATCC MYA-2876) GN=PRT1 PE=3 SV=1	EIF3B_CANAL	84 kDa	0	0	14	0	0	0
257	Putative uncharacterized protein OS=Candida albicans (strain SC5314 / ATCC MYA-2876) GN=CaO19.4127 PE=4 SV=1	Q59KL5_CANAL	35 kDa	0	8	2	0	2	2
258	Putative uncharacterized protein OS=Candida albicans (strain SC5314 / ATCC MYA-2876) GN=CaO19.13993 PE=3 SV=1	Q59R20_CANAL	77 kDa	0	0	11	0	0	0
259	Potential mitochondrial Complex I, NUAM_75kd subunit OS=Candida albicans (strain SC5314 / ATCC MYA-2876) GN=CaO19.7591 PE=4 SV=1	Q5ACQ1_CANAL	57 kDa	0	0	8	0	0	0
260	Potential cyclopropane-fatty-acyl-phospholipid synthase OS=Candida albicans (strain SC5314 / ATCC MYA-2876) GN=CFA1 PE=4 SV=1	Q5APD4_CANAL	59 kDa	0	1	5	0	1	1
261	RuvB-like helicase 1 OS=Candida albicans (strain SC5314 / ATCC MYA-2876) GN=RVB1 PE=3 SV=1	RUVB1_CANAL	50 kDa	0	0	5	0	2	1
262	Likely nucleolar ribosome biogenesis factor Rrb1p OS=Candida albicans (strain SC5314 / ATCC MYA-2876) GN=RRB1 PE=4 SV=1	Q59PD8_CANAL	58 kDa	0	1	2	0	0	0
263	Potential glycosyl hydrolase OS=Candida albicans (strain SC5314 / ATCC MYA-2876) GN=BGL98 PE=4 SV=1	Q5AJC7_CANAL	97 kDa	0	0	0	0	0	1
264	Nucleolar protein 12 OS=Candida albicans (strain SC5314 / ATCC MYA-2876) GN=NOP12 PE=3 SV=1	NOP12_CANAL	51 kDa	0	7	4	0	0	2
265	Potential glutamine permease OS=Candida albicans (strain SC5314 / ATCC MYA-2876) GN=GNP1 PE=4 SV=1	Q59RL1_CANAL	64 kDa	0	5	1	2	3	6
266	Asparagine synthetase OS=Candida albicans (strain SC5314 / ATCC MYA-2876) GN=ASN1 PE=4 SV=1	Q59SE8_CANAL	65 kDa	0	0	12	0	0	0
267	Potential mitochondrial rhodanese-like protein OS=Candida albicans (strain SC5314 / ATCC MYA-2876) GN=FMP31 PE=4 SV=1	Q59SM9_CANAL	20 kDa	2	3	4	1	2	3
268	Potential aspartate aminotransferase OS=Candida albicans (strain SC5314 / ATCC MYA-2876) GN=AAT1 PE=4 SV=1	Q59ZG5_CANAL	49 kDa	0	0	13	0	0	1
269	Profilin OS=Candida albicans (strain SC5314 / ATCC MYA-2876) GN=PFY1 PE=3 SV=1	Q5A786_CANAL	14 kDa	0	4	8	0	3	4
270	RuvB-like helicase 2 OS=Candida albicans (strain SC5314 / ATCC MYA-2876) GN=RVB2 PE=3 SV=1	RUVB2_CANAL	55 kDa	0	1	5	2	3	4
271	Cluster of Potential regulator of polarized morphogenesis Tao3p OS=Candida albicans (strain SC5314 / ATCC MYA-2876) GN=CAS4 PE=4 SV=1 (Q5AJA0_CANAL-DECOY)	Q5AJA0_CANAL-DECOY	?	0	0	0	0	0	0
271.1	Potential regulator of polarized morphogenesis Tao3p OS=Candida albicans (strain SC5314 / ATCC MYA-2876) GN=CAS4 PE=4 SV=1	Q5AJA0_CANAL-DECOY	?	0	0	0	0	0	0
272	Probable metalloprotease ARX1 OS=Candida albicans (strain SC5314 / ATCC MYA-2876) GN=ARX1 PE=3 SV=1	ARX1_CANAL	62 kDa	0	3	7	0	2	0
273	Eukaryotic translation initiation factor 3 subunit A OS=Candida albicans (strain SC5314 / ATCC MYA-2876) GN=RPG1A PE=3 SV=2	EIF3A_CANAL	106 kDa	0	0	10	0	0	0
274	Eukaryotic translation initiation factor 3 subunit G OS=Candida albicans (strain SC5314 / ATCC MYA-2876) GN=TIF35 PE=3 SV=1	EIF3G_CANAL	31 kDa	0	2	4	0	1	5
275	Phosphomannomutase OS=Candida albicans (strain SC5314 / ATCC MYA-2876) GN=PMM1 PE=1 SV=1	PMM_CANAL	29 kDa	0	0	15	0	0	0
276	Potential mitochondrial Complex I, NDUFS6_13 kd subunit OS=Candida albicans (strain SC5314 / ATCC MYA-2876) GN=CaO19.11094 PE=4 SV=1	Q59Y38_CANAL	18 kDa	0	1	6	2	0	4
277	Likely ribosome biogenesis regulatory protein Rrs1p OS=Candida albicans (strain SC5314 / ATCC MYA-2876) GN=RRS1 PE=4 SV=1	Q5ABF6_CANAL (+1)	23 kDa	2	3	4	3	3	3
278	Eukaryotic translation initiation factor 3 subunit I OS=Candida albicans (strain SC5314 / ATCC MYA-2876) GN=TIF34 PE=3 SV=1	EIF3I_CANAL	38 kDa	0	2	7	0	0	0
279	Likely calmodulin OS=Candida albicans (strain SC5314 / ATCC MYA-2876) GN=CMD1 PE=4 SV=1	Q59Q76_CANAL	19 kDa	0	3	7	0	5	4
280	Putative uncharacterized protein GAR1 OS=Candida albicans (strain SC5314 / ATCC MYA-2876) GN=GAR1 PE=4 SV=1	Q59TT0_CANAL (+1)	19 kDa	3	2	1	3	1	1
281	Serine--tRNA ligase, cytoplasmic OS=Candida albicans (strain SC5314 / ATCC MYA-2876) GN=SES1 PE=1 SV=1	SYSC_CANAL	53 kDa	0	0	14	0	0	0
282	Likely peroxisomal biogenesis AAA ATPase Pex1 OS=Candida albicans (strain SC5314 / ATCC MYA-2876) GN=PEX1 PE=4 SV=1	Q5AH73_CANAL-DECOY	?	0	1	0	0	0	0
283	Structural maintenance of chromosomes protein OS=Candida albicans (strain SC5314 / ATCC MYA-2876) GN=SMC2 PE=3 SV=1	Q59Y26_CANAL-DECOY	?	0	0	0	0	0	0
284	U3 small nucleolar RNA-associated protein 10 OS=Candida albicans (strain SC5314 / ATCC MYA-2876) GN=UTP10 PE=3 SV=1	UTP10_CANAL	204 kDa	0	1	0	0	0	1
285	Putative uncharacterized protein CAR2 OS=Candida albicans (strain SC5314 / ATCC MYA-2876) GN=CAR2 PE=3 SV=1	Q59US9_CANAL	47 kDa	0	0	14	0	0	2
286	Likely beta-1,6-glucan synthase OS=Candida albicans (strain SC5314 / ATCC MYA-2876) GN=KRE6 PE=4 SV=1	Q5A4H1_CANAL	82 kDa	0	2	0	0	1	3
287	Potential mitochondrial Complex I, 21_18kd subunit OS=Candida albicans (strain SC5314 / ATCC MYA-2876) GN=CaO19.10800 PE=4 SV=1	Q5A944_CANAL	18 kDa	1	1	3	3	0	1
288	Potential ribosome-associated chaperone OS=Candida albicans (strain SC5314 / ATCC MYA-2876) GN=ZUO1 PE=4 SV=1	Q5AF98_CANAL	48 kDa	0	0	8	0	0	0
289	Putative uncharacterized protein NIUP2 OS=Candida albicans (strain SC5314 / ATCC MYA-2876) GN=NIUP2 PE=4 SV=1	Q59NZ1_CANAL-DECOY	?	0	0	0	0	0	0
290	Cluster of Retrotransposon Tca3 polyprotein OS=Candida albicans (strain SC5314 / ATCC MYA-2876) GN=ORF298 PE=4 SV=1 (Q5A2I7_CANAL)	Q5A2I7_CANAL	140 kDa	0	0	0	0	0	0
290.1	Retrotransposon Tca3 polyprotein OS=Candida albicans (strain SC5314 / ATCC MYA-2876) GN=ORF298 PE=4 SV=1	Q5A2I7_CANAL	140 kDa	0	0	0	0	0	0
291	Potential COP9 signalosome subunit 7 OS=Candida albicans (strain SC5314 / ATCC MYA-2876) GN=CaO19.11992 PE=4 SV=1	Q59TB4_CANAL	47 kDa	0	0	8	0	1	2
292	Putative uncharacterized protein SER3 OS=Candida albicans (strain SC5314 / ATCC MYA-2876) GN=SER33 PE=3 SV=1	Q5A3K7_CANAL	50 kDa	0	0	14	0	0	0
293	Likely mitochondrial ribosomal protein (E. coli L23) OS=Candida albicans (strain SC5314 / ATCC MYA-2876) GN=MRP20 PE=4 SV=1	Q5A8Y4_CANAL	34 kDa	0	2	3	0	1	2
294	Putative uncharacterized protein EMP70 OS=Candida albicans (strain SC5314 / ATCC MYA-2876) GN=EMP70 PE=4 SV=1	Q5AF62_CANAL	71 kDa	0	6	3	0	3	2
295	Putative uncharacterized protein OS=Candida albicans (strain SC5314 / ATCC MYA-2876) GN=CaO19.11504 PE=4 SV=1	Q5AK00_CANAL	36 kDa	0	8	3	0	2	1
296	Cell wall synthesis protein OS=Candida albicans (strain SC5314 / ATCC MYA-2876) GN=KRE9 PE=4 SV=1	Q5ANN9_CANAL	29 kDa	0	4	3	3	2	2
297	Putative uncharacterized protein YRA1 OS=Candida albicans (strain SC5314 / ATCC MYA-2876) GN=YRA1 PE=4 SV=1	Q5AP75_CANAL	31 kDa	2	4	2	2	1	1
298	Septin CDC11 OS=Candida albicans (strain SC5314 / ATCC MYA-2876) GN=CDC11 PE=1 SV=1	CDC11_CANAL	47 kDa	0	0	1	0	0	2
299	Potential cytosolic ribosomal protein S9 OS=Candida albicans (strain SC5314 / ATCC MYA-2876) GN=RPS9 PE=4 SV=1	Q5AHT2_CANAL	18 kDa	0	2	6	2	3	1
300	Putative uncharacterized protein DNA43 OS=Candida albicans (strain SC5314 / ATCC MYA-2876) GN=DNA43 PE=4 SV=1	Q59WC8_CANAL-DECOY	?	0	0	2	0	2	2
301	Cluster of Putative uncharacterized protein OS=Candida albicans (strain SC5314 / ATCC MYA-2876) GN=CaO19.1991 PE=4 SV=1 (Q5AD76_CANAL)	Q5AD76_CANAL	70 kDa	0	4	3	3	3	2
301.1	Putative uncharacterized protein OS=Candida albicans (strain SC5314 / ATCC MYA-2876) GN=CaO19.1991 PE=4 SV=1	Q5AD76_CANAL	70 kDa	0	4	3	3	3	2
302	Cluster of Putative uncharacterized protein CYT1 OS=Candida albicans (strain SC5314 / ATCC MYA-2876) GN=CYT1 PE=4 SV=1 (Q59ZJ2_CANAL)	Q59ZJ2_CANAL	32 kDa	0	2	5	0	2	1
302.1	Putative uncharacterized protein CYT1 OS=Candida albicans (strain SC5314 / ATCC MYA-2876) GN=CYT1 PE=4 SV=1	Q59ZJ2_CANAL	32 kDa	0	2	5	0	2	1
303	Putative uncharacterized protein TOM71 OS=Candida albicans (strain SC5314 / ATCC MYA-2876) GN=TOM70 PE=4 SV=1	Q59LZ5_CANAL	70 kDa	0	1	8	0	0	2
304	RAN-like GTP binding protein OS=Candida albicans (strain SC5314 / ATCC MYA-2876) GN=GSP1 PE=4 SV=1	Q59P43_CANAL	24 kDa	0	0	10	0	0	0
305	Putative uncharacterized protein OS=Candida albicans (strain SC5314 / ATCC MYA-2876) GN=CaO19.1902 PE=4 SV=1	Q59U49_CANAL	65 kDa	0	2	1	0	2	2
306	Serine hydroxymethyltransferase, cytosolic OS=Candida albicans (strain SC5314 / ATCC MYA-2876) GN=SHM2 PE=1 SV=4	GLYC_CANAL	52 kDa	0	0	10	0	0	0
307	Putative uncharacterized protein SCP160 OS=Candida albicans (strain SC5314 / ATCC MYA-2876) GN=SCP160 PE=4 SV=1	Q5A3I9_CANAL	134 kDa	0	0	5	0	0	0
308	Potential polysome-associated RNA binding protein OS=Candida albicans (strain SC5314 / ATCC MYA-2876) GN=CaO19.12591 PE=4 SV=1	Q5A5F6_CANAL	21 kDa	0	3	5	1	1	3
309	Putative uncharacterized protein PCK1 OS=Candida albicans (strain SC5314 / ATCC MYA-2876) GN=PCK1 PE=3 SV=1	Q5AAH5_CANAL	61 kDa	0	0	6	0	0	0
310	Likely pyruate carboxylase OS=Candida albicans (strain SC5314 / ATCC MYA-2876) GN=PYC2 PE=4 SV=1	Q5AHK8_CANAL	108 kDa	0	0	9	0	0	0
311	Homoserine dehydrogenase OS=Candida albicans (strain SC5314 / ATCC MYA-2876) GN=HOM6 PE=3 SV=1	Q5AIA2_CANAL	39 kDa	0	0	8	0	0	2
312	ATP-dependent RNA helicase DBP7 OS=Candida albicans (strain SC5314 / ATCC MYA-2876) GN=DBP7 PE=3 SV=1	DBP7_CANAL	81 kDa	0	0	0	0	0	1
313	Serine/threonine-protein kinase TEL1 OS=Candida albicans (strain SC5314 / ATCC MYA-2876) GN=TEL1 PE=3 SV=1	ATM_CANAL-DECOY	?	0	0	0	0	0	0
314	Putative uncharacterized protein SNF2 OS=Candida albicans (strain SC5314 / ATCC MYA-2876) GN=SNF2 PE=4 SV=1	Q5ALP9_CANAL-DECOY	?	0	0	0	0	0	0
315	Cluster of Putative uncharacterized protein OS=Candida albicans (strain SC5314 / ATCC MYA-2876) GN=ADO1 PE=4 SV=1 (Q5ABV9_CANAL)	Q5ABV9_CANAL [2]	42 kDa	0	0	20	0	0	0
315.1	Putative uncharacterized protein OS=Candida albicans (strain SC5314 / ATCC MYA-2876) GN=ADO1 PE=4 SV=1	Q5ABV9_CANAL	42 kDa	0	0	20	0	0	0
315.2	Putative uncharacterized protein ADO1 OS=Candida albicans (strain SC5314 / ATCC MYA-2876) GN=ADO1 PE=4 SV=1	Q5AC80_CANAL	42 kDa	0	0	19	0	0	0
316	60S ribosomal subunit assembly/export protein LOC1 OS=Candida albicans (strain SC5314 / ATCC MYA-2876) GN=LOC1 PE=3 SV=1	LOC1_CANAL	24 kDa	0	2	3	2	0	5
317	Putative uncharacterized protein CYS3 OS=Candida albicans (strain SC5314 / ATCC MYA-2876) GN=CYS3 PE=3 SV=1	Q5A362_CANAL	43 kDa	0	0	11	0	0	1
318	Uncharacterized protein OS=Candida albicans (strain SC5314 / ATCC MYA-2876) GN=PHO88 PE=4 SV=1	Q5A3Y2_CANAL	21 kDa	0	1	4	0	1	2
319	Uncharacterized protein OS=Candida albicans (strain SC5314 / ATCC MYA-2876) GN=LYS12 PE=3 SV=1	Q5A9D9_CANAL	41 kDa	0	0	13	0	0	0
320	Likely mitochondrial ribosomal protein S7 OS=Candida albicans (strain SC5314 / ATCC MYA-2876) GN=RSM7 PE=3 SV=1	Q5AK02_CANAL	28 kDa	0	4	5	0	0	4
321	Putative uncharacterized protein OS=Candida albicans (strain SC5314 / ATCC MYA-2876) GN=CaO19.12307 PE=4 SV=1	Q5APC1_CANAL	43 kDa	1	7	3	4	0	1
322	Cluster of Putative uncharacterized protein OS=Candida albicans (strain SC5314 / ATCC MYA-2876) GN=CaO19.12593 PE=4 SV=1 (Q5A5F5_CANAL)	Q5A5F5_CANAL	43 kDa	0	3	0	0	1	3
322.1	Putative uncharacterized protein OS=Candida albicans (strain SC5314 / ATCC MYA-2876) GN=CaO19.12593 PE=4 SV=1	Q5A5F5_CANAL	43 kDa	0	3	0	0	1	3
323	Phospho-2-dehydro-3-deoxyheptonate aldolase, tyrosine-inhibited OS=Candida albicans (strain SC5314 / ATCC MYA-2876) GN=ARO4 PE=3 SV=1	AROG_CANAL	40 kDa	0	0	12	0	0	0
324	Putative uncharacterized protein HEM13 OS=Candida albicans (strain SC5314 / ATCC MYA-2876) GN=HEM13 PE=4 SV=1	Q59MR4_CANAL	37 kDa	0	0	15	0	0	0
325	Putative uncharacterized protein VMA2 OS=Candida albicans (strain SC5314 / ATCC MYA-2876) GN=VMA2 PE=3 SV=1	Q59PT0_CANAL	57 kDa	0	0	9	0	0	0
326	Probable aspartate-tRNA synthetase OS=Candida albicans (strain SC5314 / ATCC MYA-2876) GN=DPS1-1 PE=4 SV=1	Q59UF7_CANAL	65 kDa	0	0	13	0	0	0
327	Likely mitochondrial ribosomal protein (E. coli L27) OS=Candida albicans (strain SC5314 / ATCC MYA-2876) GN=MRP7 PE=4 SV=1	Q5A092_CANAL	45 kDa	0	0	5	0	1	0
328	Putative uncharacterized protein UBA1 OS=Candida albicans (strain SC5314 / ATCC MYA-2876) GN=UBA1 PE=3 SV=1	Q5A2X3_CANAL	114 kDa	0	0	8	0	0	0
329	Putative uncharacterized protein OS=Candida albicans (strain SC5314 / ATCC MYA-2876) GN=CaO19.10447 PE=4 SV=1	Q5AIC3_CANAL	72 kDa	0	2	7	0	1	1
330	Pentafunctional AROM polypeptide OS=Candida albicans (strain SC5314 / ATCC MYA-2876) GN=ARO1 PE=3 SV=1	ARO1_CANAL-DECOY	?	0	0	0	0	0	1
331	Putative uncharacterized protein CSF1 OS=Candida albicans (strain SC5314 / ATCC MYA-2876) GN=CSF1 PE=4 SV=1	Q5A4Z0_CANAL	339 kDa	0	0	0	0	0	0
332	Putative uncharacterized protein SNF4 OS=Candida albicans (strain SC5314 / ATCC MYA-2876) GN=SNF4 PE=4 SV=1	Q5A8I0_CANAL-DECOY	?	0	0	0	0	0	0
333	Putative uncharacterized protein SDH2 OS=Candida albicans (strain SC5314 / ATCC MYA-2876) GN=SDH2 PE=4 SV=1	Q59QN7_CANAL	30 kDa	0	0	4	0	0	2
334	Putative uncharacterized protein SMT3 OS=Candida albicans (strain SC5314 / ATCC MYA-2876) GN=SMT3 PE=4 SV=1	Q59W54_CANAL	11 kDa	2	1	1	3	2	2
335	Potential cytosolic leucyl tRNA synthetase OS=Candida albicans (strain SC5314 / ATCC MYA-2876) GN=CDC60B PE=1 SV=1	Q5A9A4_CANAL	107 kDa	0	0	13	0	0	0
336	Lysine--tRNA ligase OS=Candida albicans (strain SC5314 / ATCC MYA-2876) GN=KRS1 PE=3 SV=1	Q5ADU2_CANAL	68 kDa	0	0	11	0	0	0
337	Likely mitochondrial ribosomal protein (E. coli S15) OS=Candida albicans (strain SC5314 / ATCC MYA-2876) GN=MRPS28 PE=3 SV=1	Q5A9E5_CANAL	37 kDa	0	1	1	0	0	1
338	Putative uncharacterized protein OS=Candida albicans (strain SC5314 / ATCC MYA-2876) GN=CaO19.7403 PE=4 SV=1	Q5A308_CANAL	84 kDa	0	0	0	0	0	0
339	Retrotransposon TCA4 polyprotein OS=Candida albicans (strain SC5314 / ATCC MYA-2876) GN=CaO19.2669 PE=4 SV=1	Q5AG24_CANAL-DECOY	?	0	0	0	0	0	0
340	Putative uncharacterized protein ERG10 OS=Candida albicans (strain SC5314 / ATCC MYA-2876) GN=ERG10 PE=3 SV=1	Q59K50_CANAL	42 kDa	0	0	8	0	0	1
341	DNA-directed RNA polymerase OS=Candida albicans (strain SC5314 / ATCC MYA-2876) GN=RPO3 PE=3 SV=1	Q5A0Z3_CANAL (+1)	161 kDa	0	0	0	0	0	0
342	Putative uncharacterized protein OS=Candida albicans (strain SC5314 / ATCC MYA-2876) GN=CaO19.10434 PE=4 SV=1	Q5A1A2_CANAL	59 kDa	0	0	8	0	0	0
343	Putative uncharacterized protein LSC1 OS=Candida albicans (strain SC5314 / ATCC MYA-2876) GN=LSC1 PE=3 SV=1	Q5A8X6_CANAL	34 kDa	0	1	6	0	0	3
344	Possible mitochondrial ribosomal protein MRPL20p OS=Candida albicans (strain SC5314 / ATCC MYA-2876) GN=MRPL20 PE=4 SV=1	Q59QT4_CANAL	21 kDa	0	1	2	0	1	2
345	Putative uncharacterized protein OS=Candida albicans (strain SC5314 / ATCC MYA-2876) GN=CaO19.12885 PE=4 SV=1	Q5A7N6_CANAL	25 kDa	2	2	1	3	1	1
346	Cullin-associated NEDD8-dissociated protein 1 OS=Candida albicans (strain SC5314 / ATCC MYA-2876) GN=TIP120 PE=3 SV=1	CAND1_CANAL-DECOY	?	0	0	0	0	0	0
347	Putative uncharacterized protein OS=Candida albicans (strain SC5314 / ATCC MYA-2876) GN=CaO19.11305 PE=4 SV=1	Q5A666_CANAL	13 kDa	0	1	0	0	0	0
348	Likely glycerol-3-phosphate dehydrogenase OS=Candida albicans (strain SC5314 / ATCC MYA-2876) GN=GPD2 PE=3 SV=1	Q59W33_CANAL	41 kDa	0	0	9	0	0	0
349	Uncharacterized protein OS=Candida albicans (strain SC5314 / ATCC MYA-2876) GN=TUB1 PE=3 SV=1	Q5A401_CANAL	36 kDa	0	0	4	0	1	1
350	Chitin synthase Chs3p OS=Candida albicans (strain SC5314 / ATCC MYA-2876) GN=CHS8 PE=4 SV=1	Q5A7T2_CANAL	126 kDa	0	3	0	0	3	2
351	Single-stranded DNA-binding protein OS=Candida albicans (strain SC5314 / ATCC MYA-2876) GN=RIM1 PE=3 SV=1	Q5AA01_CANAL	16 kDa	0	1	6	2	0	0
352	Thioredoxin OS=Candida albicans (strain SC5314 / ATCC MYA-2876) GN=TRX1 PE=3 SV=1	Q5ACN1_CANAL	11 kDa	0	0	10	0	3	1
353	Likely protein kinase OS=Candida albicans (strain SC5314 / ATCC MYA-2876) GN=BCK1 PE=4 SV=1	Q5A5B8_CANAL	148 kDa	0	0	0	0	0	0
354	Putative uncharacterized protein OS=Candida albicans (strain SC5314 / ATCC MYA-2876) GN=GYP2 PE=4 SV=1	Q5A465_CANAL	108 kDa	0	0	0	0	0	0
355	Potential fungal zinc cluster transcription factor OS=Candida albicans (strain SC5314 / ATCC MYA-2876) GN=LEU3 PE=4 SV=1	Q5AGF5_CANAL-DECOY	?	0	0	0	0	0	0
356	Uncharacterized protein OS=Candida albicans (strain SC5314 / ATCC MYA-2876) GN=CaO19.13429 PE=4 SV=1	Q5AN95_CANAL-DECOY	?	0	2	0	0	0	0
357	Putative uncharacterized protein OS=Candida albicans (strain SC5314 / ATCC MYA-2876) GN=MLP1 PE=4 SV=1	Q5AMG3_CANAL (+1)	208 kDa	0	0	1	0	0	0
358	Putative uncharacterized protein CSF1 OS=Candida albicans (strain SC5314 / ATCC MYA-2876) GN=CSF1 PE=4 SV=1	Q5A4Z0_CANAL-DECOY	?	0	0	0	0	0	0
359	Putative uncharacterized protein SEC16 OS=Candida albicans (strain SC5314 / ATCC MYA-2876) GN=SEC16 PE=4 SV=1	Q5AG35_CANAL-DECOY	?	0	0	0	0	0	0
360	Hypothetical YFW family protein 8 OS=Candida albicans (strain SC5314 / ATCC MYA-2876) GN=YFW8 PE=4 SV=1	Q5A074_CANAL-DECOY	?	0	0	0	0	0	0
361	Cluster of Glycolipid 2-alpha-mannosyltransferase 1 OS=Candida albicans (strain SC5314 / ATCC MYA-2876) GN=MNT1 PE=3 SV=1 (MNT1_CANAL)	MNT1_CANAL	50 kDa	0	0	7	0	0	0
361.1	Glycolipid 2-alpha-mannosyltransferase 1 OS=Candida albicans (strain SC5314 / ATCC MYA-2876) GN=MNT1 PE=3 SV=1	MNT1_CANAL	50 kDa	0	0	7	0	0	0
362	Putative uncharacterized protein OS=Candida albicans (strain SC5314 / ATCC MYA-2876) GN=CaO19.12543 PE=4 SV=1	Q5A785_CANAL	19 kDa	2	1	2	1	0	1
363	Putative uncharacterized protein OS=Candida albicans (strain SC5314 / ATCC MYA-2876) GN=CaO19.12529 PE=4 SV=1	Q5A799_CANAL	21 kDa	0	2	1	1	2	5
364	Putative uncharacterized protein MIS1 OS=Candida albicans (strain SC5314 / ATCC MYA-2876) GN=MIS1 PE=3 SV=1	Q5AAF6_CANAL	111 kDa	0	0	7	0	0	0
365	Likely mitochondrial ribosomal protein (E. coli L3) OS=Candida albicans (strain SC5314 / ATCC MYA-2876) GN=MRPL9 PE=3 SV=1	Q5AAK4_CANAL	32 kDa	0	1	2	0	0	2
366	Transcriptional repressor TUP1 OS=Candida albicans (strain SC5314 / ATCC MYA-2876) GN=TUP1 PE=1 SV=1	TUP1_CANAL	58 kDa	0	0	10	0	1	0
367	Potential tRNA (Gm18) ribose methyltransferase OS=Candida albicans (strain SC5314 / ATCC MYA-2876) GN=TRM3 PE=4 SV=1	Q59LD8_CANAL-DECOY	?	0	0	0	0	0	0
368	Putative uncharacterized protein FAB1 OS=Candida albicans (strain SC5314 / ATCC MYA-2876) GN=FAB1 PE=4 SV=1	Q5AM63_CANAL	296 kDa	0	0	0	0	0	0
369	Putative uncharacterized protein OS=Candida albicans (strain SC5314 / ATCC MYA-2876) GN=USO6 PE=4 SV=1	Q59YV6_CANAL	129 kDa	0	0	0	0	0	0
370	Putative uncharacterized protein OS=Candida albicans (strain SC5314 / ATCC MYA-2876) GN=CaO19.10521 PE=4 SV=1	Q5AI49_CANAL-DECOY	?	0	0	0	0	0	0
371	Putative uncharacterized protein OS=Candida albicans (strain SC5314 / ATCC MYA-2876) GN=CaO19.14137 PE=4 SV=1	Q59RB5_CANAL	45 kDa	0	0	0	0	0	0
372	Pentafunctional AROM polypeptide OS=Candida albicans (strain SC5314 / ATCC MYA-2876) GN=ARO1 PE=3 SV=1	ARO1_CANAL	170 kDa	0	0	7	0	0	0
373	Inosine-5'-monophosphate dehydrogenase OS=Candida albicans (strain SC5314 / ATCC MYA-2876) GN=IMH3 PE=1 SV=2	IMDH_CANAL	56 kDa	0	0	13	0	0	0
374	Cytosolic ribosomal acidic protein P1B OS=Candida albicans (strain SC5314 / ATCC MYA-2876) GN=RPP1B PE=3 SV=1	Q5A0A6_CANAL	11 kDa	1	1	4	1	1	2
375	Likely mitochondrial ribosomal protein (E. coli L20) OS=Candida albicans (strain SC5314 / ATCC MYA-2876) GN=IMG1 PE=4 SV=1	Q5A1M8_CANAL	18 kDa	0	2	2	2	0	1
376	Putative uncharacterized protein NIUP2 OS=Candida albicans (strain SC5314 / ATCC MYA-2876) GN=NIUP2 PE=4 SV=1	Q59NZ1_CANAL	86 kDa	0	2	1	0	2	2
377	Putative uncharacterized protein KEM1 OS=Candida albicans (strain SC5314 / ATCC MYA-2876) GN=KEM1 PE=4 SV=1	Q5AL09_CANAL (+1)	163 kDa	0	1	0	0	0	0
378	Putative uncharacterized protein OS=Candida albicans (strain SC5314 / ATCC MYA-2876) GN=CaO19.10714 PE=4 SV=1	Q59YW4_CANAL-DECOY	?	0	0	0	0	0	0
379	Cluster of Retrotransposon Tca2 polyprotein OS=Candida albicans (strain SC5314 / ATCC MYA-2876) GN=POL98 PE=4 SV=1 (Q59K39_CANAL-DECOY)	Q59K39_CANAL-DECOY	?	0	0	0	0	0	0
379.1	Retrotransposon Tca2 polyprotein OS=Candida albicans (strain SC5314 / ATCC MYA-2876) GN=POL98 PE=4 SV=1	Q59K39_CANAL-DECOY	?	0	0	0	0	0	0
380	Mannan endo-1,6-alpha-mannosidase DFG5 OS=Candida albicans (strain SC5314 / ATCC MYA-2876) GN=DFG5 PE=1 SV=1	DFG5_CANAL	50 kDa	0	1	1	0	3	1
381	Putative uncharacterized protein DRS2 OS=Candida albicans (strain SC5314 / ATCC MYA-2876) GN=DRS2 PE=4 SV=1	Q5ADR3_CANAL	149 kDa	0	4	0	1	3	0
382	Putative uncharacterized protein OS=Candida albicans (strain SC5314 / ATCC MYA-2876) GN=CaO19.7057 PE=3 SV=1	Q5AFL1_CANAL	83 kDa	0	0	11	0	0	0
383	Putative uncharacterized protein IDH1 OS=Candida albicans (strain SC5314 / ATCC MYA-2876) GN=IDH1 PE=3 SV=1	Q5APD9_CANAL	21 kDa	0	2	4	0	1	2
384	Protein transport protein SEC31 OS=Candida albicans (strain SC5314 / ATCC MYA-2876) GN=SEC31 PE=3 SV=1	SEC31_CANAL	136 kDa	0	0	8	0	0	0
385	Likely mitochondrial ribosome protein MRPL37p OS=Candida albicans (strain SC5314 / ATCC MYA-2876) GN=MRPL37 PE=4 SV=1	Q59VH8_CANAL	14 kDa	0	2	1	0	2	3
386	ATP-dependent RNA helicase DBP7 OS=Candida albicans (strain SC5314 / ATCC MYA-2876) GN=DBP7 PE=3 SV=1	DBP7_CANAL-DECOY	?	0	0	0	0	0	0
387	Putative NADPH-dependent methylglyoxal reductase GRP2 OS=Candida albicans (strain SC5314 / ATCC MYA-2876) GN=GRP2 PE=1 SV=2	GRP2_CANAL	38 kDa	0	0	8	0	0	0
388	Putative uncharacterized protein CYS4 OS=Candida albicans (strain SC5314 / ATCC MYA-2876) GN=CYS4 PE=4 SV=1	Q59T95_CANAL	54 kDa	0	0	11	0	0	0
389	Likely mitochondrial ribosomal protein (E. coli L15) OS=Candida albicans (strain SC5314 / ATCC MYA-2876) GN=MRPL10 PE=3 SV=1	Q59ZI7_CANAL	32 kDa	0	1	3	0	0	1
390	Putative uncharacterized protein GRS1 OS=Candida albicans (strain SC5314 / ATCC MYA-2876) GN=GRS1 PE=4 SV=1	Q5A2A5_CANAL	74 kDa	0	0	13	0	0	0
391	Likely translation initiation factor eIF2 alpha subunit OS=Candida albicans (strain SC5314 / ATCC MYA-2876) GN=SUI2 PE=4 SV=1	Q5AAU7_CANAL	34 kDa	0	1	8	2	2	0
392	Likely vacuolar ATPase V1 complex subunit A OS=Candida albicans (strain SC5314 / ATCC MYA-2876) GN=TFP1 PE=3 SV=1	Q5AJB1_CANAL	63 kDa	0	0	11	0	0	0
393	Putative uncharacterized protein HTS1 OS=Candida albicans (strain SC5314 / ATCC MYA-2876) GN=HTS1 PE=3 SV=1	Q5AJX0_CANAL	56 kDa	0	0	11	0	0	0
394	Potential RNA binding protein OS=Candida albicans (strain SC5314 / ATCC MYA-2876) GN=CaO19.444 PE=4 SV=1	Q5A297_CANAL	16 kDa	0	1	2	0	1	1
395	Putative uncharacterized protein OS=Candida albicans (strain SC5314 / ATCC MYA-2876) GN=CaO19.7497 PE=3 SV=1	Q5AAJ3_CANAL	99 kDa	0	0	0	0	0	0
396	Putative uncharacterized protein OS=Candida albicans (strain SC5314 / ATCC MYA-2876) GN=CaO19.8300 PE=4 SV=1	Q59W82_CANAL	122 kDa	0	1	1	0	0	0
397	Vacuolar membrane-associated protein IML1 OS=Candida albicans (strain SC5314 / ATCC MYA-2876) GN=IML1 PE=3 SV=1	IML1_CANAL	169 kDa	0	0	0	0	0	0
398	Potential U3 snoRNP protein Utp20p OS=Candida albicans (strain SC5314 / ATCC MYA-2876) GN=UTP20 PE=4 SV=1	Q59L20_CANAL	137 kDa	0	0	0	0	0	0
399	Cluster of Putative uncharacterized protein MSS4 OS=Candida albicans (strain SC5314 / ATCC MYA-2876) GN=MSS4 PE=4 SV=1 (Q59L34_CANAL-DECOY)	Q59L34_CANAL-DECOY	?	0	0	0	0	0	1
399.1	Putative uncharacterized protein MSS4 OS=Candida albicans (strain SC5314 / ATCC MYA-2876) GN=MSS4 PE=4 SV=1	Q59L34_CANAL-DECOY	?	0	0	0	0	0	1
400	Cytochrome c oxidase subunit 2 OS=Candida albicans (strain SC5314 / ATCC MYA-2876) GN=COX2 PE=3 SV=2	COX2_CANAL	30 kDa	1	1	3	2	1	1
401	Eukaryotic translation initiation factor 3 subunit J OS=Candida albicans (strain SC5314 / ATCC MYA-2876) GN=HCR1 PE=3 SV=1	EIF3J_CANAL	32 kDa	0	0	2	0	0	1
402	Glutamate dehydrogenase OS=Candida albicans (strain SC5314 / ATCC MYA-2876) GN=GDH3 PE=3 SV=1	Q59KP4_CANAL	50 kDa	0	0	10	0	0	0
403	Putative uncharacterized protein LYS7 OS=Candida albicans (strain SC5314 / ATCC MYA-2876) GN=LYS7 PE=4 SV=1	Q59WC0_CANAL	27 kDa	0	1	4	0	1	1
404	Putative uncharacterized protein OS=Candida albicans (strain SC5314 / ATCC MYA-2876) GN=CaO19.7239 PE=4 SV=1	Q59ZV2_CANAL	25 kDa	0	0	4	0	1	3
405	Putative uncharacterized protein FMN1 OS=Candida albicans (strain SC5314 / ATCC MYA-2876) GN=FMN1 PE=4 SV=1	Q5A015_CANAL	20 kDa	0	2	2	0	1	5
406	Putative uncharacterized protein PHM7 OS=Candida albicans (strain SC5314 / ATCC MYA-2876) GN=PHM7 PE=4 SV=1	Q5A2U5_CANAL	104 kDa	0	0	3	0	0	0
407	Likely mitochondrial ribosomal protein MRPL40p OS=Candida albicans (strain SC5314 / ATCC MYA-2876) GN=MRPL40 PE=4 SV=1	Q5A6S0_CANAL	39 kDa	0	0	4	0	0	1
408	Likely mitochondrial ribosomal protein (E. coli L11) OS=Candida albicans (strain SC5314 / ATCC MYA-2876) GN=MRPL19 PE=3 SV=1	Q5AAS9_CANAL	15 kDa	0	3	4	1	3	3
409	Putative uncharacterized protein OS=Candida albicans (strain SC5314 / ATCC MYA-2876) GN=CaO19.5627 PE=4 SV=1	Q5ABS3_CANAL (+1)	41 kDa	0	2	5	0	0	1
410	Likely mitochondrial ribosomal protein MRPL25p OS=Candida albicans (strain SC5314 / ATCC MYA-2876) GN=MRPL25 PE=4 SV=1	Q5ACG8_CANAL	19 kDa	0	1	2	0	0	1
411	Potential mitochondrial Complex I, NUHM_24kd subunit OS=Candida albicans (strain SC5314 / ATCC MYA-2876) GN=CaO19.2091 PE=3 SV=1	Q5ACX6_CANAL	27 kDa	0	0	4	0	0	1
412	Likely mitochondrial ribosomal protein S8 OS=Candida albicans (strain SC5314 / ATCC MYA-2876) GN=MRPS8 PE=4 SV=1	Q5ALN2_CANAL	17 kDa	0	0	3	0	3	3
413	Putative uncharacterized protein FMC1 OS=Candida albicans (strain SC5314 / ATCC MYA-2876) GN=FMC1 PE=4 SV=1	Q5APE0_CANAL	18 kDa	0	0	0	0	0	0
414	GTP-binding protein RHO1 OS=Candida albicans (strain SC5314 / ATCC MYA-2876) GN=RHO1 PE=3 SV=1	RHO1_CANAL	22 kDa	0	0	6	0	0	0
415	UTP--glucose-1-phosphate uridylyltransferase OS=Candida albicans (strain SC5314 / ATCC MYA-2876) GN=UGP1 PE=1 SV=1	UGP1_CANAL	53 kDa	0	0	11	0	0	0
416	DNA polymerase OS=Candida albicans (strain SC5314 / ATCC MYA-2876) GN=POL2 PE=3 SV=1	Q59SM7_CANAL-DECOY	?	0	0	0	0	0	0
417	Putative uncharacterized protein SCP160 OS=Candida albicans (strain SC5314 / ATCC MYA-2876) GN=SCP160 PE=4 SV=1	Q5A3I9_CANAL-DECOY	?	0	0	0	0	0	0
418	Potential peptide pheromone ABC transporter OS=Candida albicans (strain SC5314 / ATCC MYA-2876) GN=HST6 PE=3 SV=1	Q5A2X1_CANAL	149 kDa	0	1	0	0	0	0
419	Potential dsRNA virus protection family member OS=Candida albicans (strain SC5314 / ATCC MYA-2876) GN=SKI3 PE=4 SV=1	Q5APB7_CANAL	159 kDa	0	0	0	0	0	0
420	ATP-dependent RNA helicase HAS1 OS=Candida albicans (strain SC5314 / ATCC MYA-2876) GN=HAS1 PE=3 SV=1	HAS1_CANAL	63 kDa	0	1	3	0	0	0
421	Putative uncharacterized protein STU2 OS=Candida albicans (strain SC5314 / ATCC MYA-2876) GN=STU2 PE=4 SV=1	Q59NK5_CANAL	101 kDa	0	0	0	0	0	0
422	Putative uncharacterized protein BAS1 OS=Candida albicans (strain SC5314 / ATCC MYA-2876) GN=BAS1 PE=4 SV=1	Q59T43_CANAL	68 kDa	0	0	0	0	0	1
423	Putative uncharacterized protein SMD1 OS=Candida albicans (strain SC5314 / ATCC MYA-2876) GN=SMD1 PE=4 SV=1	Q5ACG9_CANAL	13 kDa	3	0	3	3	0	2
424	Putative uncharacterized protein NOP15 OS=Candida albicans (strain SC5314 / ATCC MYA-2876) GN=NOP15 PE=4 SV=1	Q5AFL8_CANAL	30 kDa	0	3	3	0	1	1
425	Potential ADP-ribosylation factor OS=Candida albicans (strain SC5314 / ATCC MYA-2876) GN=ARF2 PE=3 SV=1	Q5AND9_CANAL	21 kDa	0	0	9	0	0	1
426	Putative uncharacterized protein SPT2 OS=Candida albicans (strain SC5314 / ATCC MYA-2876) GN=SPT2 PE=4 SV=1	Q5ADW5_CANAL	38 kDa	2	2	2	2	1	1
427	Potential regulator of polarized morphogenesis Tao3p OS=Candida albicans (strain SC5314 / ATCC MYA-2876) GN=CAS4 PE=4 SV=1	Q5AJA0_CANAL	318 kDa	0	0	0	0	0	0
428	Putative uncharacterized protein BLM3 OS=Candida albicans (strain SC5314 / ATCC MYA-2876) GN=BLM3 PE=4 SV=1	Q5A2T3_CANAL-DECOY	?	0	1	0	0	0	0
429	Autophagy-related protein 13 OS=Candida albicans (strain SC5314 / ATCC MYA-2876) GN=ATG13 PE=3 SV=1	ATG13_CANAL	84 kDa	0	0	0	0	0	0
430	Cluster of Potential ABC transporter OS=Candida albicans (strain SC5314 / ATCC MYA-2876) GN=CDR4 PE=4 SV=1 (Q5A783_CANAL)	Q5A783_CANAL [2]	169 kDa	0	0	0	0	0	0
430.1	Multidrug resistance protein CDR2 OS=Candida albicans (strain SC5314 / ATCC MYA-2876) GN=CDR2 PE=3 SV=2	CDR2_CANAL	169 kDa	0	0	0	0	0	0
430.2	Multidrug resistance protein CDR1 OS=Candida albicans (strain SC5314 / ATCC MYA-2876) GN=CDR1 PE=4 SV=1	Q5ANA3_CANAL	170 kDa	0	0	0	0	0	0
431	Cluster of Putative uncharacterized protein OS=Candida albicans (strain SC5314 / ATCC MYA-2876) GN=CaO19.12439 PE=4 SV=1 (Q5ALC7_CANAL)	Q5ALC7_CANAL	33 kDa	0	0	0	0	0	0
431.1	Putative uncharacterized protein OS=Candida albicans (strain SC5314 / ATCC MYA-2876) GN=CaO19.12439 PE=4 SV=1	Q5ALC7_CANAL	33 kDa	0	0	0	0	0	0
432	NADH-cytochrome b5 reductase 2 OS=Candida albicans (strain SC5314 / ATCC MYA-2876) GN=MCR1 PE=3 SV=1	MCR1_CANAL	33 kDa	0	0	6	0	0	1
433	Likely tryptophan synthetase alpha chain OS=Candida albicans (strain SC5314 / ATCC MYA-2876) GN=TRP5 PE=3 SV=1	Q59KP3_CANAL	76 kDa	0	0	8	0	0	0
434	Importin subunit alpha OS=Candida albicans (strain SC5314 / ATCC MYA-2876) GN=SRP1 PE=3 SV=1	Q59LB7_CANAL	61 kDa	0	1	4	0	1	1
435	Likely translation initiation factor eIF3 subunit Sui1 OS=Candida albicans (strain SC5314 / ATCC MYA-2876) GN=SUI1 PE=4 SV=1	Q59LQ6_CANAL	12 kDa	0	3	2	0	2	4
436	Potential mitochondrial carrier protein Ggc1 OS=Candida albicans (strain SC5314 / ATCC MYA-2876) GN=YHM1 PE=3 SV=1	Q59W78_CANAL	33 kDa	0	0	2	0	0	1
437	Putative uncharacterized protein TYS1 OS=Candida albicans (strain SC5314 / ATCC MYA-2876) GN=TYS1 PE=4 SV=1	Q5AFB3_CANAL	45 kDa	0	0	8	0	0	1
438	Putative uncharacterized protein THR4 OS=Candida albicans (strain SC5314 / ATCC MYA-2876) GN=THR4 PE=4 SV=1	Q5AGE6_CANAL	58 kDa	0	0	12	0	0	0
439	Potential mitochondrial Complex I, 40kd subunit OS=Candida albicans (strain SC5314 / ATCC MYA-2876) GN=CaO19.1682 PE=4 SV=1	Q5AJA9_CANAL	43 kDa	0	0	2	0	0	1
440	Putative uncharacterized protein OS=Candida albicans (strain SC5314 / ATCC MYA-2876) GN=CaO19.9241 PE=4 SV=1	Q5AJB9_CANAL (+1)	138 kDa	0	0	4	0	0	0
441	60S acidic ribosomal protein P1-A OS=Candida albicans (strain SC5314 / ATCC MYA-2876) GN=RPP1A PE=3 SV=1	RLA1_CANAL	11 kDa	0	0	6	1	1	1
442	Ribosome biogenesis protein NSA2 OS=Candida albicans (strain SC5314 / ATCC MYA-2876) GN=NSA2 PE=3 SV=1	NSA2_CANAL	30 kDa	0	2	2	0	0	0
443	Putative uncharacterized protein NAP1 OS=Candida albicans (strain SC5314 / ATCC MYA-2876) GN=NAP1 PE=3 SV=1	Q5AAI8_CANAL	50 kDa	0	0	0	0	0	0
444	Putative uncharacterized protein OS=Candida albicans (strain SC5314 / ATCC MYA-2876) GN=CaO19.9073 PE=4 SV=1	Q5ALS8_CANAL	99 kDa	0	2	0	0	0	2
445	Putative uncharacterized protein PRE2 OS=Candida albicans (strain SC5314 / ATCC MYA-2876) GN=PRE2 PE=3 SV=1	Q59Z65_CANAL	31 kDa	0	0	0	0	0	0
446	Actin-regulating kinase PRK1 OS=Candida albicans (strain SC5314 / ATCC MYA-2876) GN=PRK1 PE=1 SV=1	PRK1_CANAL	78 kDa	0	2	0	0	2	1
447	Hypothetical YFW family protein 6 OS=Candida albicans (strain SC5314 / ATCC MYA-2876) GN=YFW6 PE=4 SV=1	Q5ABV8_CANAL-DECOY	?	0	0	0	0	0	0
448	Putative uncharacterized protein OS=Candida albicans (strain SC5314 / ATCC MYA-2876) GN=ZCF25 PE=4 SV=1	Q5AN84_CANAL	92 kDa	0	0	0	0	0	0
449	Cluster of Nuclear DNA binding protein Rbf1p OS=Candida albicans (strain SC5314 / ATCC MYA-2876) GN=RBF1 PE=4 SV=1 (Q5ABZ2_CANAL)	Q5ABZ2_CANAL	60 kDa	0	0	0	0	1	2
449.1	Nuclear DNA binding protein Rbf1p OS=Candida albicans (strain SC5314 / ATCC MYA-2876) GN=RBF1 PE=4 SV=1	Q5ABZ2_CANAL	60 kDa	0	0	0	0	1	2
450	Cluster of Possible proteasome-interacting protein Cic1 OS=Candida albicans (strain SC5314 / ATCC MYA-2876) GN=CaO19.7771 PE=4 SV=1 (Q59WS7_CANAL)	Q59WS7_CANAL	44 kDa	0	0	3	0	0	0
450.1	Possible proteasome-interacting protein Cic1 OS=Candida albicans (strain SC5314 / ATCC MYA-2876) GN=CaO19.124 PE=4 SV=1	Q59XN2_CANAL	41 kDa	0	0	3	0	0	0
451	Cluster of Likely plasma membrane t-SNARE OS=Candida albicans (strain SC5314 / ATCC MYA-2876) GN=SEC9 PE=4 SV=1 (Q59WT5_CANAL)	Q59WT5_CANAL [2]	58 kDa	0	5	0	0	0	2
451.1	Likely plasma membrane t-SNARE OS=Candida albicans (strain SC5314 / ATCC MYA-2876) GN=SEC9 PE=4 SV=1	Q59WT5_CANAL	58 kDa	0	5	0	0	0	2
451.2	Likely plasma membrane t-SNARE OS=Candida albicans (strain SC5314 / ATCC MYA-2876) GN=SEC9 PE=4 SV=1	Q59XP0_CANAL	59 kDa	0	0	0	0	0	0
452	Cluster of Putative uncharacterized protein OS=Candida albicans (strain SC5314 / ATCC MYA-2876) GN=CaO19.8890 PE=4 SV=1 (Q59TM6_CANAL-DECOY)	Q59TM6_CANAL-DECOY	?	0	1	0	0	0	0
452.1	Putative uncharacterized protein OS=Candida albicans (strain SC5314 / ATCC MYA-2876) GN=CaO19.8890 PE=4 SV=1	Q59TM6_CANAL-DECOY	?	0	1	0	0	0	0
453	Small heat shock protein 21 OS=Candida albicans (strain SC5314 / ATCC MYA-2876) GN=HSP21 PE=1 SV=1	HSP21_CANAL	21 kDa	0	0	2	0	0	0
454	Putative uncharacterized protein THS1 OS=Candida albicans (strain SC5314 / ATCC MYA-2876) GN=THS1 PE=3 SV=1	Q59LB4_CANAL	82 kDa	0	0	8	0	0	0
455	Putative uncharacterized protein SPX5 OS=Candida albicans (strain SC5314 / ATCC MYA-2876) GN=SPX5 PE=4 SV=1	Q5AH31_CANAL	37 kDa	0	0	6	0	0	0
456	Putative uncharacterized protein OS=Candida albicans (strain SC5314 / ATCC MYA-2876) GN=CaO19.10471 PE=4 SV=1	Q5AI99_CANAL	23 kDa	0	1	5	0	2	2
457	Potential mitochondrial Complex I, NUGM_30kd subunit OS=Candida albicans (strain SC5314 / ATCC MYA-2876) GN=CaO19.1710 PE=3 SV=1	Q5AJ83_CANAL	32 kDa	0	0	6	0	0	2
458	Aspartate-semialdehyde dehydrogenase OS=Candida albicans (strain SC5314 / ATCC MYA-2876) GN=HOM2 PE=1 SV=1	Q5ALM0_CANAL	39 kDa	0	0	8	0	0	0
459	DNA-directed RNA polymerase OS=Candida albicans (strain SC5314 / ATCC MYA-2876) GN=RPA135 PE=3 SV=1	Q5AFK6_CANAL-DECOY	?	0	0	0	0	1	0
460	Putative uncharacterized protein INP52 OS=Candida albicans (strain SC5314 / ATCC MYA-2876) GN=INP52 PE=4 SV=1	Q5AFL6_CANAL-DECOY	?	0	0	0	0	0	0
461	Cluster of Putative uncharacterized protein RPC53 OS=Candida albicans (strain SC5314 / ATCC MYA-2876) GN=RPC53 PE=4 SV=1 (Q5AFX8_CANAL)	Q5AFX8_CANAL	50 kDa	0	0	0	0	0	3
461.1	Putative uncharacterized protein RPC53 OS=Candida albicans (strain SC5314 / ATCC MYA-2876) GN=RPC53 PE=4 SV=1	Q5AFX8_CANAL	50 kDa	0	0	0	0	0	3
462	Cluster of Putative uncharacterized protein OS=Candida albicans (strain SC5314 / ATCC MYA-2876) GN=CaO19.7899 PE=4 SV=1 (Q5AEY7_CANAL)	Q5AEY7_CANAL	122 kDa	0	0	0	0	0	1
462.1	Putative uncharacterized protein OS=Candida albicans (strain SC5314 / ATCC MYA-2876) GN=CaO19.7899 PE=4 SV=1	Q5AEY7_CANAL	122 kDa	0	0	0	0	0	1
463	Putative uncharacterized protein OS=Candida albicans (strain SC5314 / ATCC MYA-2876) GN=CaO19.6686 PE=4 SV=1	Q59R60_CANAL	85 kDa	0	1	1	0	0	0
464	Putative uncharacterized protein ABP1 OS=Candida albicans (strain SC5314 / ATCC MYA-2876) GN=ABP1 PE=4 SV=1	Q5AFA8_CANAL	71 kDa	0	0	4	0	0	0
465	Likely mitochondrial ribosomal protein S16 OS=Candida albicans (strain SC5314 / ATCC MYA-2876) GN=MRPS16 PE=3 SV=1	Q5AFQ6_CANAL	20 kDa	0	1	4	0	0	1
466	Protein transport protein SEC24 OS=Candida albicans (strain SC5314 / ATCC MYA-2876) GN=SEC24 PE=3 SV=1	SEC24_CANAL	102 kDa	0	0	3	0	0	0
467	Putative uncharacterized protein OS=Candida albicans (strain SC5314 / ATCC MYA-2876) GN=CaO19.1667 PE=4 SV=1	Q5AJC4_CANAL-DECOY	?	0	0	0	0	0	0
468	FACT complex subunit POB3 OS=Candida albicans (strain SC5314 / ATCC MYA-2876) GN=POB3 PE=3 SV=1	POB3_CANAL	61 kDa	0	2	0	0	0	1
469	Mitochondrial import inner membrane translocase subunit TIM9 OS=Candida albicans (strain SC5314 / ATCC MYA-2876) GN=TIM9 PE=3 SV=1	TIM9_CANAL	13 kDa	1	2	2	1	1	0
470	Potential histone acetyltransferase component Tra1p OS=Candida albicans (strain SC5314 / ATCC MYA-2876) GN=TRA1 PE=4 SV=1	Q5A4J0_CANAL	263 kDa	0	0	0	0	0	0
471	Potential nonsense-mediated mRNA decay factor OS=Candida albicans (strain SC5314 / ATCC MYA-2876) GN=NMD2 PE=4 SV=1	Q5AHD2_CANAL-DECOY	?	0	0	0	0	0	0
472	Likely protein kinase OS=Candida albicans (strain SC5314 / ATCC MYA-2876) GN=CaO19.11321 PE=4 SV=1	Q5A650_CANAL	156 kDa	0	0	0	0	1	0
473	Putative uncharacterized protein SVL3 OS=Candida albicans (strain SC5314 / ATCC MYA-2876) GN=SVL3 PE=4 SV=1	Q59TV6_CANAL-DECOY	?	0	1	0	0	0	0
474	Putative uncharacterized protein MSU1 OS=Candida albicans (strain SC5314 / ATCC MYA-2876) GN=MSU1 PE=4 SV=1	Q59Y25_CANAL (+1)	131 kDa	0	0	0	0	0	0
475	Translation factor GUF1, mitochondrial OS=Candida albicans (strain SC5314 / ATCC MYA-2876) GN=GUF1 PE=3 SV=1	GUF1_CANAL-DECOY	?	0	0	0	0	0	0
476	Putative uncharacterized protein OS=Candida albicans (strain SC5314 / ATCC MYA-2876) GN=CaO19.13956 PE=4 SV=1	Q59PS9_CANAL	59 kDa	0	1	0	0	0	0
477	Cluster of Putative uncharacterized protein OS=Candida albicans (strain SC5314 / ATCC MYA-2876) GN=CaO19.9498 PE=4 SV=1 (Q5A1Q3_CANAL)	Q5A1Q3_CANAL	91 kDa	0	0	0	0	0	0
477.1	Putative uncharacterized protein OS=Candida albicans (strain SC5314 / ATCC MYA-2876) GN=CaO19.9498 PE=4 SV=1	Q5A1Q3_CANAL	91 kDa	0	0	0	0	0	0
478	Cluster of Putative uncharacterized protein STI1 OS=Candida albicans (strain SC5314 / ATCC MYA-2876) GN=STI1 PE=4 SV=1 (Q59YX6_CANAL)	Q59YX6_CANAL	66 kDa	0	0	6	0	0	0
478.1	Putative uncharacterized protein STI1 OS=Candida albicans (strain SC5314 / ATCC MYA-2876) GN=STI1 PE=4 SV=1	Q59YX6_CANAL	66 kDa	0	0	6	0	0	0
479	Putative uncharacterized protein LHP1 OS=Candida albicans (strain SC5314 / ATCC MYA-2876) GN=LHP1 PE=4 SV=1	Q59PX0_CANAL	38 kDa	0	2	3	0	1	1
480	Potential mitochondrial Complex I, NUBM_51kd subunit OS=Candida albicans (strain SC5314 / ATCC MYA-2876) GN=NDH51 PE=4 SV=1	Q59TD5_CANAL	54 kDa	0	1	5	0	0	0
481	Potential amino acyl-tRNA synthetase complex component OS=Candida albicans (strain SC5314 / ATCC MYA-2876) GN=ARC1 PE=4 SV=1	Q59UE4_CANAL	41 kDa	0	0	6	0	0	0
482	Likely mitochondrial ribosomal protein (E. coli L21) OS=Candida albicans (strain SC5314 / ATCC MYA-2876) GN=MRPL49 PE=4 SV=1	Q5A5B9_CANAL	18 kDa	0	1	3	0	1	2
483	Coatomer subunit beta OS=Candida albicans (strain SC5314 / ATCC MYA-2876) GN=SEC26 PE=3 SV=1	Q5A6M6_CANAL	107 kDa	0	0	3	0	0	0
484	Putative uncharacterized protein TUB2 OS=Candida albicans (strain SC5314 / ATCC MYA-2876) GN=TUB2 PE=4 SV=1	Q5ABD6_CANAL	34 kDa	0	0	3	0	0	1
485	Putative uncharacterized protein TOM40 OS=Candida albicans (strain SC5314 / ATCC MYA-2876) GN=TOM40 PE=4 SV=1	Q5AH14_CANAL	42 kDa	0	0	5	0	0	0
486	Putative uncharacterized protein OS=Candida albicans (strain SC5314 / ATCC MYA-2876) GN=CaO19.7552 PE=4 SV=1	Q5ACU0_CANAL	101 kDa	0	0	0	0	0	0
487	Likely mitochondrial ribosomal protein Rsm24p OS=Candida albicans (strain SC5314 / ATCC MYA-2876) GN=RSM24 PE=4 SV=1	Q5AI30_CANAL	36 kDa	0	0	2	0	0	1
488	RNA polymerase II degradation factor 1 OS=Candida albicans (strain SC5314 / ATCC MYA-2876) GN=DEF1 PE=3 SV=1	DEF1_CANAL	41 kDa	0	2	2	0	0	2
489	Putative uncharacterized protein OS=Candida albicans (strain SC5314 / ATCC MYA-2876) GN=CaO19.7494 PE=4 SV=1	Q5AAJ6_CANAL	197 kDa	0	0	0	0	0	0
490	Putative uncharacterized protein RAD3 OS=Candida albicans (strain SC5314 / ATCC MYA-2876) GN=RAD3 PE=4 SV=1	Q5AFE9_CANAL	88 kDa	0	0	1	0	0	0
491	Putative uncharacterized protein OS=Candida albicans (strain SC5314 / ATCC MYA-2876) GN=CaO19.12850 PE=4 SV=1	Q5A7S2_CANAL	141 kDa	0	1	0	0	0	0
492	Cluster of Acetolactate synthase OS=Candida albicans (strain SC5314 / ATCC MYA-2876) GN=ILV2 PE=3 SV=1 (Q5AJV7_CANAL)	Q5AJV7_CANAL	74 kDa	0	0	7	0	0	0
492.1	Acetolactate synthase OS=Candida albicans (strain SC5314 / ATCC MYA-2876) GN=ILV2 PE=3 SV=1	Q5AJV7_CANAL	74 kDa	0	0	7	0	0	0
493	Clustered mitochondria protein homolog OS=Candida albicans (strain SC5314 / ATCC MYA-2876) GN=CLU1 PE=3 SV=1	CLU_CANAL	156 kDa	0	0	8	0	0	0
494	Deoxyuridine 5'-triphosphate nucleotidohydrolase OS=Candida albicans (strain SC5314 / ATCC MYA-2876) GN=DUT1 PE=3 SV=1	DUT_CANAL	17 kDa	0	2	3	0	1	2
495	Adenylosuccinate synthetase OS=Candida albicans (strain SC5314 / ATCC MYA-2876) GN=ADE12 PE=3 SV=1	PURA_CANAL	48 kDa	0	0	9	0	0	0
496	Potential DNA binding protein OS=Candida albicans (strain SC5314 / ATCC MYA-2876) GN=DOT6 PE=4 SV=1	Q5A9C0_CANAL	65 kDa	0	0	0	1	0	0
497	Potential rRNA processing factor OS=Candida albicans (strain SC5314 / ATCC MYA-2876) GN=MRT4 PE=3 SV=1	Q5AC00_CANAL	26 kDa	0	2	6	0	0	0
498	Putative uncharacterized protein ARO8 OS=Candida albicans (strain SC5314 / ATCC MYA-2876) GN=ARO8 PE=4 SV=1	Q5ADA2_CANAL	55 kDa	0	0	6	0	0	0
499	Cytosolic ribosomal acidic protein P2B OS=Candida albicans (strain SC5314 / ATCC MYA-2876) GN=RPP2B PE=3 SV=1	Q5ANH5_CANAL	11 kDa	0	1	3	0	1	3
500	54S ribosomal protein L51, mitochondrial OS=Candida albicans (strain SC5314 / ATCC MYA-2876) GN=MRPL51 PE=3 SV=1	RM51_CANAL	16 kDa	0	1	2	0	0	1
501	Putative uncharacterized protein OS=Candida albicans (strain SC5314 / ATCC MYA-2876) GN=CaO19.8613 PE=4 SV=1	Q59NB2_CANAL	59 kDa	0	1	0	2	0	2
502	Putative uncharacterized protein GSY1 OS=Candida albicans (strain SC5314 / ATCC MYA-2876) GN=GSY1 PE=4 SV=1	Q5A850_CANAL	76 kDa	0	0	2	0	0	0
503	Putative uncharacterized protein CHS3 OS=Candida albicans (strain SC5314 / ATCC MYA-2876) GN=CHS3 PE=4 SV=1	Q5AL39_CANAL	13 kDa	0	1	0	0	1	2
504	Putative uncharacterized protein MAK11 OS=Candida albicans (strain SC5314 / ATCC MYA-2876) GN=MAK11 PE=4 SV=1	Q59P13_CANAL	55 kDa	0	1	2	0	2	0
505	Histone H3.1/H3.2 OS=Candida albicans (strain SC5314 / ATCC MYA-2876) GN=HHT1 PE=3 SV=3	H31_CANAL	15 kDa	0	0	0	0	0	1
506	Possible membrane protein OS=Candida albicans (strain SC5314 / ATCC MYA-2876) GN=CaO19.3535 PE=4 SV=1	Q59ZI4_CANAL (+1)	31 kDa	1	3	1	1	1	2
507	Putative uncharacterized protein OS=Candida albicans (strain SC5314 / ATCC MYA-2876) GN=CaO19.1107 PE=4 SV=1	Q59N81_CANAL	21 kDa	0	0	0	1	1	0
508	DNA-directed RNA polymerase OS=Candida albicans (strain SC5314 / ATCC MYA-2876) GN=RPA190 PE=3 SV=1	Q59LW3_CANAL	186 kDa	0	1	0	0	0	0
509	Putative uncharacterized protein KIP3 OS=Candida albicans (strain SC5314 / ATCC MYA-2876) GN=KIP3 PE=3 SV=1	Q5A4I2_CANAL	109 kDa	0	0	0	0	0	1
510	Putative uncharacterized protein OS=Candida albicans (strain SC5314 / ATCC MYA-2876) GN=LPI9 PE=4 SV=1	Q5AGZ6_CANAL-DECOY	?	0	0	0	0	0	0
511	Putative uncharacterized protein VIP1 OS=Candida albicans (strain SC5314 / ATCC MYA-2876) GN=VIP1 PE=4 SV=1	Q5A4W6_CANAL-DECOY	?	0	0	0	0	0	0
512	Potential regulator of cell polarity OS=Candida albicans (strain SC5314 / ATCC MYA-2876) GN=ZDS1 PE=4 SV=1	Q5A667_CANAL-DECOY	?	0	0	0	0	0	0
513	Alcohol dehydrogenase 2 OS=Candida albicans (strain SC5314 / ATCC MYA-2876) GN=ADH2 PE=1 SV=1	ADH2_CANAL-DECOY	?	0	0	0	0	2	0
514	Potential ARF GAP OS=Candida albicans (strain SC5314 / ATCC MYA-2876) GN=AGE1 PE=4 SV=1	Q5AI02_CANAL-DECOY	?	0	0	0	0	0	0
515	Putative uncharacterized protein RGP1 OS=Candida albicans (strain SC5314 / ATCC MYA-2876) GN=RGP1 PE=4 SV=1	Q5AHA2_CANAL	79 kDa	0	0	0	0	0	0
516	Cluster of Putative uncharacterized protein OS=Candida albicans (strain SC5314 / ATCC MYA-2876) GN=CaO19.1202 PE=4 SV=1 (Q59RK2_CANAL)	Q59RK2_CANAL	51 kDa	0	0	0	0	0	0
516.1	Putative uncharacterized protein OS=Candida albicans (strain SC5314 / ATCC MYA-2876) GN=CaO19.1202 PE=4 SV=1	Q59RK2_CANAL	51 kDa	0	0	0	0	0	0
517	Cluster of Putative uncharacterized protein SEC16 OS=Candida albicans (strain SC5314 / ATCC MYA-2876) GN=SEC16 PE=4 SV=1 (Q5AG35_CANAL)	Q5AG35_CANAL	226 kDa	0	0	0	0	0	0
517.1	Putative uncharacterized protein SEC16 OS=Candida albicans (strain SC5314 / ATCC MYA-2876) GN=SEC16 PE=4 SV=1	Q5AG35_CANAL	226 kDa	0	0	0	0	0	0
518	Cluster of Lanosterol 14-alpha-demethylase OS=Candida albicans (strain SC5314 / ATCC MYA-2876) GN=ERG11 PE=3 SV=1 (G1UB69_CANAL)	G1UB69_CANAL [2]	61 kDa	0	0	11	0	0	0
518.1	Lanosterol 14-alpha-demethylase OS=Candida albicans (strain SC5314 / ATCC MYA-2876) GN=ERG11 PE=3 SV=1	G1UB69_CANAL	61 kDa	0	0	10	0	0	0
518.2	Lanosterol 14-alpha demethylase OS=Candida albicans (strain SC5314 / ATCC MYA-2876) GN=ERG11 PE=3 SV=2	CP51_CANAL	61 kDa	0	0	10	0	0	0
519	Mannose-6-phosphate isomerase OS=Candida albicans (strain SC5314 / ATCC MYA-2876) GN=PMI1 PE=1 SV=2	MPI_CANAL	49 kDa	0	0	7	0	0	0
520	Putative uncharacterized protein HET1 OS=Candida albicans (strain SC5314 / ATCC MYA-2876) GN=HET1 PE=4 SV=1	Q59L90_CANAL	22 kDa	0	0	7	0	0	0
521	Serine/threonine-protein phosphatase OS=Candida albicans (strain SC5314 / ATCC MYA-2876) GN=GLC7 PE=3 SV=1	Q59N42_CANAL	38 kDa	0	1	5	0	2	0
522	Glutamine synthetase OS=Candida albicans (strain SC5314 / ATCC MYA-2876) GN=GLN1 PE=3 SV=1	Q59QQ1_CANAL	42 kDa	0	0	6	0	0	0
523	Putative uncharacterized protein SUB2 OS=Candida albicans (strain SC5314 / ATCC MYA-2876) GN=SUB2 PE=4 SV=1	Q59US3_CANAL	33 kDa	0	0	7	0	0	0
524	Likely 26S proteasome regulatory particle subunit Rpn2p OS=Candida albicans (strain SC5314 / ATCC MYA-2876) GN=RPN2 PE=4 SV=1	Q5A3L0_CANAL	105 kDa	0	0	5	0	0	0
525	Likely protein kinase OS=Candida albicans (strain SC5314 / ATCC MYA-2876) GN=KIN1 PE=4 SV=1	Q5AAI1_CANAL	134 kDa	0	3	1	0	0	0
526	Putative uncharacterized protein YRB1 OS=Candida albicans (strain SC5314 / ATCC MYA-2876) GN=YRB1 PE=4 SV=1	Q5AAL2_CANAL	24 kDa	0	1	3	0	1	1
527	Acyl carrier protein OS=Candida albicans (strain SC5314 / ATCC MYA-2876) GN=ACP11 PE=3 SV=1	Q5AHH7_CANAL	12 kDa	0	0	5	0	0	4
528	Putative uncharacterized protein GCV3 OS=Candida albicans (strain SC5314 / ATCC MYA-2876) GN=GCV3 PE=3 SV=1	Q5AKX1_CANAL	20 kDa	0	0	5	0	0	0
529	Putative uncharacterized protein DST1 OS=Candida albicans (strain SC5314 / ATCC MYA-2876) GN=DST1 PE=4 SV=1	Q59T94_CANAL	34 kDa	0	2	3	0	0	0
530	Putative uncharacterized protein OS=Candida albicans (strain SC5314 / ATCC MYA-2876) GN=CaO19.12257 PE=4 SV=1	Q5APH1_CANAL	23 kDa	0	2	2	0	1	3
531	Likely mitochondrial ribosomal protein S5 OS=Candida albicans (strain SC5314 / ATCC MYA-2876) GN=MRPS5 PE=3 SV=1	Q59NE6_CANAL	38 kDa	0	1	2	0	1	0
532	Putative uncharacterized protein RFC3 OS=Candida albicans (strain SC5314 / ATCC MYA-2876) GN=RCF3 PE=4 SV=1	Q59ML2_CANAL (+1)	41 kDa	0	0	0	0	0	1
533	Putative uncharacterized protein OS=Candida albicans (strain SC5314 / ATCC MYA-2876) GN=CaO19.12255 PE=4 SV=1	Q5APH4_CANAL	115 kDa	0	0	0	0	0	0
534	Potential nuclear DNA repair complex SMC ATPase OS=Candida albicans (strain SC5314 / ATCC MYA-2876) GN=RHC18 PE=4 SV=1	Q5AGX1_CANAL	130 kDa	0	0	0	0	0	0
535	Lysophospholipase NTE1 OS=Candida albicans (strain SC5314 / ATCC MYA-2876) GN=NTE1 PE=3 SV=1	NTE1_CANAL	156 kDa	0	0	0	0	0	0
536	Putative uncharacterized protein OS=Candida albicans (strain SC5314 / ATCC MYA-2876) GN=CaO19.8461 PE=4 SV=1	Q5AHT0_CANAL-DECOY	?	0	0	0	0	1	0
537	Sterol 3-beta-glucosyltransferase OS=Candida albicans (strain SC5314 / ATCC MYA-2876) GN=ATG26 PE=3 SV=1	ATG26_CANAL-DECOY	?	0	0	0	0	0	0
538	Chromatin modification-related protein EAF7 OS=Candida albicans (strain SC5314 / ATCC MYA-2876) GN=EAF7 PE=3 SV=1	EAF7_CANAL	51 kDa	0	1	1	0	0	0
539	Putative uncharacterized protein RRP5 OS=Candida albicans (strain SC5314 / ATCC MYA-2876) GN=RRP5 PE=4 SV=1	Q5ALK0_CANAL	193 kDa	0	0	0	0	0	0
540	Formin BNR1 OS=Candida albicans (strain SC5314 / ATCC MYA-2876) GN=BNR1 PE=1 SV=1	BNR1_CANAL	169 kDa	0	1	0	0	0	0
541	Putative uncharacterized protein PRP16 OS=Candida albicans (strain SC5314 / ATCC MYA-2876) GN=PRP16 PE=4 SV=1	Q5A227_CANAL-DECOY	?	0	0	0	0	0	0
542	Putative uncharacterized protein PHO81 OS=Candida albicans (strain SC5314 / ATCC MYA-2876) GN=PHO81 PE=4 SV=1	Q5AAL5_CANAL	149 kDa	0	1	0	0	0	0
543	DASH complex subunit DAD2 OS=Candida albicans (strain SC5314 / ATCC MYA-2876) GN=DAD2 PE=3 SV=1	DAD2_CANAL-DECOY	?	0	0	0	0	3	0
544	Putative uncharacterized protein OS=Candida albicans (strain SC5314 / ATCC MYA-2876) GN=CaO19.13048 PE=4 SV=1	Q5ABU5_CANAL-DECOY	?	0	0	0	0	0	0
545	Putative uncharacterized protein PST2 OS=Candida albicans (strain SC5314 / ATCC MYA-2876) GN=PST3 PE=4 SV=1	Q59KV2_CANAL	21 kDa	0	0	6	0	0	0
546	Putative uncharacterized protein OS=Candida albicans (strain SC5314 / ATCC MYA-2876) GN=CaO19.1426 PE=4 SV=1	Q59P91_CANAL	81 kDa	0	3	0	0	2	1
547	Likely mitochondrial ribosomal protein S4 OS=Candida albicans (strain SC5314 / ATCC MYA-2876) GN=NAM9 PE=4 SV=1	Q5A6Q6_CANAL	53 kDa	0	0	4	0	0	0
548	Likely Arginyl tRNA synthetase OS=Candida albicans (strain SC5314 / ATCC MYA-2876) GN=CaO19.10849 PE=3 SV=1	Q5A8Z3_CANAL	73 kDa	0	0	12	0	0	0
549	Uncharacterized protein OS=Candida albicans (strain SC5314 / ATCC MYA-2876) GN=FRS1 PE=4 SV=1	Q5A993_CANAL	67 kDa	0	0	6	0	0	0
550	Putative uncharacterized protein RNH11 OS=Candida albicans (strain SC5314 / ATCC MYA-2876) GN=RNH11 PE=4 SV=1	Q5ABT7_CANAL (+1)	30 kDa	0	4	3	0	1	2
551	Putative uncharacterized protein NOP13 OS=Candida albicans (strain SC5314 / ATCC MYA-2876) GN=NOP13 PE=4 SV=1	Q5ADS5_CANAL	45 kDa	0	5	1	0	2	1
552	Glucose-6-phosphate 1-dehydrogenase OS=Candida albicans (strain SC5314 / ATCC MYA-2876) GN=ZWF1 PE=3 SV=1	Q5APL0_CANAL	58 kDa	0	0	8	0	0	0
553	Possible Sin3-Rpd3 histone deacetylase complex component Sap30p OS=Candida albicans (strain SC5314 / ATCC MYA-2876) GN=CaO19.6667 PE=4 SV=1	Q59NY8_CANAL	19 kDa	0	1	1	1	2	2
554	Putative uncharacterized protein VPS13 OS=Candida albicans (strain SC5314 / ATCC MYA-2876) GN=VPS13 PE=4 SV=1	Q59Q73_CANAL-DECOY	?	0	0	0	0	0	0
555	Putative uncharacterized protein OS=Candida albicans (strain SC5314 / ATCC MYA-2876) GN=CaO19.14160 PE=4 SV=1	Q59T47_CANAL	150 kDa	0	0	0	0	0	1
556	Uncharacterized protein OS=Candida albicans (strain SC5314 / ATCC MYA-2876) GN=CaO19.13429 PE=4 SV=1	Q5AN95_CANAL	108 kDa	0	2	1	0	0	0
557	Putative uncharacterized protein OS=Candida albicans (strain SC5314 / ATCC MYA-2876) GN=LPI9 PE=4 SV=1	Q5AGZ6_CANAL	151 kDa	0	1	0	0	0	0
558	Putative uncharacterized protein OS=Candida albicans (strain SC5314 / ATCC MYA-2876) GN=CaO19.12390 PE=4 SV=1	Q5AL53_CANAL-DECOY	?	0	0	0	0	0	0
559	Putative uncharacterized protein STB2 OS=Candida albicans (strain SC5314 / ATCC MYA-2876) GN=STB2 PE=4 SV=1	Q5AEF4_CANAL-DECOY	?	0	0	0	0	0	0
560	Uncharacterized protein OS=Candida albicans (strain SC5314 / ATCC MYA-2876) GN=CaO19.13401 PE=4 SV=1	Q5ANC3_CANAL-DECOY	?	0	0	0	0	1	0
561	Potential COPII-coated vesicle integral membrane protein OS=Candida albicans (strain SC5314 / ATCC MYA-2876) GN=EMP46 PE=4 SV=1	Q59U01_CANAL-DECOY	?	0	0	0	0	0	0
562	Putative uncharacterized protein OS=Candida albicans (strain SC5314 / ATCC MYA-2876) GN=CaO19.1834 PE=4 SV=1	Q59LW8_CANAL-DECOY	?	0	0	0	0	0	1
563	Putative uncharacterized protein TIP20 OS=Candida albicans (strain SC5314 / ATCC MYA-2876) GN=TIP20 PE=4 SV=1	Q5AK17_CANAL	91 kDa	0	1	0	0	0	0
564	Uncharacterized protein OS=Candida albicans (strain SC5314 / ATCC MYA-2876) GN=MCM6 PE=3 SV=1	Q5A955_CANAL	98 kDa	0	1	0	0	0	0
565	Potential fungal zinc cluster transcription factor OS=Candida albicans (strain SC5314 / ATCC MYA-2876) GN=ZCF27 PE=4 SV=1	Q5AMJ8_CANAL	137 kDa	0	1	0	0	0	0
566	Putative uncharacterized protein OS=Candida albicans (strain SC5314 / ATCC MYA-2876) GN=CaO19.11496 PE=4 SV=1	Q5AK07_CANAL-DECOY	?	0	0	0	0	0	1
567	Cluster of Putative uncharacterized protein SAC3 OS=Candida albicans (strain SC5314 / ATCC MYA-2876) GN=SAC3 PE=4 SV=1 (Q5ALM2_CANAL-DECOY)	Q5ALM2_CANAL-DECOY	?	0	1	0	0	0	0
567.1	Putative uncharacterized protein SAC3 OS=Candida albicans (strain SC5314 / ATCC MYA-2876) GN=SAC3 PE=4 SV=1	Q5ALM2_CANAL-DECOY	?	0	1	0	0	0	0
568	Cluster of Putative uncharacterized protein OS=Candida albicans (strain SC5314 / ATCC MYA-2876) GN=CaO19.3473 PE=4 SV=1 (Q59S68_CANAL)	Q59S68_CANAL	60 kDa	0	0	0	0	0	2
568.1	Putative uncharacterized protein OS=Candida albicans (strain SC5314 / ATCC MYA-2876) GN=CaO19.3473 PE=4 SV=1	Q59S68_CANAL	60 kDa	0	0	0	0	0	2
569	Cytochrome c peroxidase, mitochondrial OS=Candida albicans (strain SC5314 / ATCC MYA-2876) GN=CCP1 PE=3 SV=1	CCPR_CANAL	41 kDa	0	0	6	0	0	0
570	Cys-Gly metallodipeptidase DUG1 OS=Candida albicans (strain SC5314 / ATCC MYA-2876) GN=DUG1 PE=1 SV=1	DUG1_CANAL	54 kDa	0	0	10	0	0	0
571	pH-responsive protein 2 OS=Candida albicans (strain SC5314 / ATCC MYA-2876) GN=PHR2 PE=2 SV=2	PHR2_CANAL	59 kDa	0	0	3	0	0	1
572	Putative uncharacterized protein DED81 OS=Candida albicans (strain SC5314 / ATCC MYA-2876) GN=DED81 PE=4 SV=1	Q59R18_CANAL	62 kDa	0	0	8	0	0	0
573	Likely mitochondrial ribosomal protein MRPL3 OS=Candida albicans (strain SC5314 / ATCC MYA-2876) GN=MRPL3 PE=4 SV=1	Q5A798_CANAL	45 kDa	0	0	4	0	1	0
574	Putative uncharacterized protein FUM1 OS=Candida albicans (strain SC5314 / ATCC MYA-2876) GN=FUM12 PE=4 SV=1	Q5ADW7_CANAL	30 kDa	0	0	6	0	0	0
575	Potential mitochondrial nonproton-pumping NADH dehydrogenase OS=Candida albicans (strain SC5314 / ATCC MYA-2876) GN=NDE1 PE=4 SV=1	Q5AEC9_CANAL	64 kDa	0	0	4	0	0	0
576	Putative uncharacterized protein UAP1 OS=Candida albicans (strain SC5314 / ATCC MYA-2876) GN=UAP1 PE=4 SV=1	Q5AGB4_CANAL	55 kDa	0	0	3	0	0	0
577	Potential cytosolic chaperonin CCT ring complex subunit Cct3 OS=Candida albicans (strain SC5314 / ATCC MYA-2876) GN=CCT3 PE=3 SV=1	Q5AK16_CANAL	59 kDa	0	0	5	0	0	0
578	Putative uncharacterized protein ARO3 OS=Candida albicans (strain SC5314 / ATCC MYA-2876) GN=ARO3 PE=4 SV=1	Q5ALQ9_CANAL	29 kDa	0	0	8	0	0	0
579	SWI5-dependent HO expression protein 3 OS=Candida albicans (strain SC5314 / ATCC MYA-2876) GN=SHE3 PE=3 SV=1	SHE3_CANAL	59 kDa	0	2	1	0	0	0
580	Translationally-controlled tumor protein homolog OS=Candida albicans (strain SC5314 / ATCC MYA-2876) GN=TMA19 PE=3 SV=1	TCTP_CANAL	19 kDa	0	0	6	0	1	1
581	Putative uncharacterized protein OS=Candida albicans (strain SC5314 / ATCC MYA-2876) GN=CaO19.13944 PE=4 SV=1	Q59PU1_CANAL	14 kDa	0	2	0	0	1	1
582	Putative uncharacterized protein VPH1 OS=Candida albicans (strain SC5314 / ATCC MYA-2876) GN=VPH1 PE=4 SV=1	Q59RL4_CANAL	108 kDa	0	1	0	0	0	0
583	Putative uncharacterized protein RFC1 OS=Candida albicans (strain SC5314 / ATCC MYA-2876) GN=RFC1 PE=4 SV=1	Q59T27_CANAL (+1)	77 kDa	0	0	0	0	0	0
584	Putative uncharacterized protein OS=Candida albicans (strain SC5314 / ATCC MYA-2876) GN=CaO19.13567 PE=4 SV=1	Q59RN5_CANAL	118 kDa	0	0	0	0	1	0
585	Protein HIR1 OS=Candida albicans (strain SC5314 / ATCC MYA-2876) GN=HIR1 PE=3 SV=1	HIR1_CANAL	96 kDa	0	1	0	0	0	0
586	Putative uncharacterized protein OS=Candida albicans (strain SC5314 / ATCC MYA-2876) GN=NOC2 PE=4 SV=1	Q59M49_CANAL	81 kDa	0	1	0	0	0	0
587	Putative uncharacterized protein OS=Candida albicans (strain SC5314 / ATCC MYA-2876) GN=CaO19.13046 PE=4 SV=1	Q5ABU6_CANAL	16 kDa	0	0	0	0	2	0
588	Potential CCR4-NOT complex associated factor Caf120p OS=Candida albicans (strain SC5314 / ATCC MYA-2876) GN=CAF120 PE=4 SV=1	Q5A3J6_CANAL	115 kDa	0	0	0	0	1	0
589	Potential intra-Golgi transport complex subunit 4 OS=Candida albicans (strain SC5314 / ATCC MYA-2876) GN=COG4 PE=4 SV=1	Q59T37_CANAL	101 kDa	0	0	0	0	0	0
590	Putative uncharacterized protein OS=Candida albicans (strain SC5314 / ATCC MYA-2876) GN=CaO19.11264 PE=4 SV=1	Q5A6I7_CANAL-DECOY	?	0	0	0	0	1	0
591	Putative uncharacterized protein PRP6 OS=Candida albicans (strain SC5314 / ATCC MYA-2876) GN=PRP6 PE=4 SV=1	Q59PD7_CANAL-DECOY	?	0	0	0	0	0	0
592	DNA topoisomerase 2 OS=Candida albicans (strain SC5314 / ATCC MYA-2876) GN=TOP2 PE=3 SV=1	Q5A1E7_CANAL-DECOY	?	0	0	0	0	0	0
593	Mitosis inhibitor protein kinase SWE1 OS=Candida albicans (strain SC5314 / ATCC MYA-2876) GN=SWE1 PE=1 SV=1	SWE1_CANAL	131 kDa	0	0	0	0	0	0
594	Potential inositol polyphosphate-5-phosphatase Inp51p OS=Candida albicans (strain SC5314 / ATCC MYA-2876) GN=INP51 PE=4 SV=1	Q59YF3_CANAL (+1)	113 kDa	0	0	0	0	1	0
595	Likely protein kinase OS=Candida albicans (strain SC5314 / ATCC MYA-2876) GN=CaO19.11993 PE=4 SV=1	Q59TB3_CANAL	109 kDa	0	0	0	0	0	0
596	Putative uncharacterized protein POL3 OS=Candida albicans (strain SC5314 / ATCC MYA-2876) GN=POL3 PE=4 SV=1	Q5A597_CANAL-DECOY	?	0	0	0	0	0	0
597	Pre-mRNA-splicing factor CEF1 OS=Candida albicans (strain SC5314 / ATCC MYA-2876) GN=CEF1 PE=3 SV=1	CEF1_CANAL-DECOY	?	0	0	0	0	0	0
598	Likely nucleolar ribosome biogenesis factor Rrb1p OS=Candida albicans (strain SC5314 / ATCC MYA-2876) GN=RRB1 PE=4 SV=1	Q59PD8_CANAL-DECOY	?	0	0	0	0	0	0
599	Cluster of Putative uncharacterized protein LRO1 OS=Candida albicans (strain SC5314 / ATCC MYA-2876) GN=LRO1 PE=4 SV=1 (Q5ABF2_CANAL)	Q5ABF2_CANAL	80 kDa	0	0	0	0	0	0
599.1	Putative uncharacterized protein LRO1 OS=Candida albicans (strain SC5314 / ATCC MYA-2876) GN=LRO1 PE=4 SV=1	Q5ABF2_CANAL	80 kDa	0	0	0	0	0	0
600	Deoxyhypusine hydroxylase OS=Candida albicans (strain SC5314 / ATCC MYA-2876) GN=LIA1 PE=3 SV=1	DOHH_CANAL	36 kDa	0	0	7	0	0	0
601	Putative uncharacterized protein OS=Candida albicans (strain SC5314 / ATCC MYA-2876) GN=CaO19.14148 PE=4 SV=1	Q59RA4_CANAL (+1)	57 kDa	0	5	0	0	1	1
602	Putative uncharacterized protein NOB1 OS=Candida albicans (strain SC5314 / ATCC MYA-2876) GN=HBR3 PE=4 SV=1	Q59SR4_CANAL	53 kDa	1	4	0	1	1	0
603	Putative uncharacterized protein SSO2 OS=Candida albicans (strain SC5314 / ATCC MYA-2876) GN=SSO2 PE=3 SV=1	Q59YF0_CANAL	34 kDa	0	0	1	0	1	0
604	Putative uncharacterized protein MAM33 OS=Candida albicans (strain SC5314 / ATCC MYA-2876) GN=MAM33 PE=4 SV=1	Q5A0A8_CANAL	30 kDa	0	0	4	0	0	0
605	Likely 26S proteasome regulatory particle ATPase Rpt5p OS=Candida albicans (strain SC5314 / ATCC MYA-2876) GN=RPT5 PE=4 SV=1	Q5A0X3_CANAL	50 kDa	0	0	4	0	0	0
606	Potential cell wall beta-glucan synthase OS=Candida albicans (strain SC5314 / ATCC MYA-2876) GN=SKN1 PE=4 SV=1	Q5A4H2_CANAL	68 kDa	0	3	0	0	1	0
607	Reticulon-like protein OS=Candida albicans (strain SC5314 / ATCC MYA-2876) GN=RTN1 PE=4 SV=1	Q5A691_CANAL	39 kDa	0	0	4	0	0	1
608	Likely mitochondrial ribosomal protein (E. coli L13) OS=Candida albicans (strain SC5314 / ATCC MYA-2876) GN=MRPL23 PE=4 SV=1	Q5A8Y6_CANAL	20 kDa	0	0	3	0	0	0
609	T-complex protein 1 subunit delta OS=Candida albicans (strain SC5314 / ATCC MYA-2876) GN=CCT4 PE=3 SV=1	Q5AF88_CANAL	59 kDa	0	0	7	0	0	0
610	Potential mitochondrial Complex I, NUCM_49kd subunit OS=Candida albicans (strain SC5314 / ATCC MYA-2876) GN=NUC2 PE=3 SV=1	Q5AH07_CANAL	54 kDa	0	0	4	0	0	0
611	Putative uncharacterized protein OS=Candida albicans (strain SC5314 / ATCC MYA-2876) GN=CaO19.12487 PE=4 SV=1	Q5AKV7_CANAL	38 kDa	0	0	0	0	0	0
612	Serine/threonine-protein kinase GIN4 OS=Candida albicans (strain SC5314 / ATCC MYA-2876) GN=GIN4 PE=1 SV=1	GIN4_CANAL	153 kDa	0	0	0	0	0	0
613	Putative uncharacterized protein OS=Candida albicans (strain SC5314 / ATCC MYA-2876) GN=CaO19.7116 PE=4 SV=1	Q5AFF1_CANAL	37 kDa	0	2	3	1	0	1
614	Likely mitochondrial ribosomal protein S12 OS=Candida albicans (strain SC5314 / ATCC MYA-2876) GN=MRPS12 PE=3 SV=1	Q5AA46_CANAL	20 kDa	0	1	2	1	1	1
615	Putative uncharacterized protein OS=Candida albicans (strain SC5314 / ATCC MYA-2876) GN=CaO19.8480 PE=4 SV=1	Q5AHD5_CANAL	20 kDa	0	0	0	0	1	2
616	Mediator of RNA polymerase II transcription subunit 14 OS=Candida albicans (strain SC5314 / ATCC MYA-2876) GN=RGR1 PE=3 SV=2	MED14_CANAL	148 kDa	0	0	0	0	0	0
617	Putative uncharacterized protein OS=Candida albicans (strain SC5314 / ATCC MYA-2876) GN=CaO19.4947 PE=4 SV=1	Q5AL30_CANAL	19 kDa	0	1	1	0	0	1
618	Genetic interactor of prohibitins 3, mitochondrial OS=Candida albicans (strain SC5314 / ATCC MYA-2876) GN=GEP3 PE=3 SV=1	GEP3_CANAL	72 kDa	0	0	0	0	1	0
619	Putative uncharacterized protein OS=Candida albicans (strain SC5314 / ATCC MYA-2876) GN=CaO19.7173 PE=4 SV=1	Q5A0C3_CANAL	67 kDa	0	0	0	0	0	1
620	Putative uncharacterized protein OS=Candida albicans (strain SC5314 / ATCC MYA-2876) GN=CaO19.11806 PE=4 SV=1	Q5AGI7_CANAL	164 kDa	0	0	0	0	0	1
621	Potential translation-regulating helicase OS=Candida albicans (strain SC5314 / ATCC MYA-2876) GN=SLH1 PE=4 SV=1	Q5AK41_CANAL	219 kDa	0	0	0	0	0	0
622	RAN-like GTP binding protein OS=Candida albicans (strain SC5314 / ATCC MYA-2876) GN=GSP1 PE=4 SV=1	Q59P43_CANAL-DECOY	?	0	0	0	0	0	0
623	Putative uncharacterized protein OS=Candida albicans (strain SC5314 / ATCC MYA-2876) GN=CaO19.11639 PE=4 SV=1	Q59SK9_CANAL	124 kDa	0	0	1	0	0	0
624	Putative uncharacterized protein OS=Candida albicans (strain SC5314 / ATCC MYA-2876) GN=CaO19.7026 PE=4 SV=1	Q5AFP2_CANAL	16 kDa	0	0	0	0	0	0
625	Cluster of Putative uncharacterized protein LYS212 OS=Candida albicans (strain SC5314 / ATCC MYA-2876) GN=LYS21 PE=3 SV=1 (Q59VG1_CANAL)	Q59VG1_CANAL [2]	47 kDa	0	0	8	0	0	0
625.1	Putative uncharacterized protein LYS212 OS=Candida albicans (strain SC5314 / ATCC MYA-2876) GN=LYS21 PE=3 SV=1	Q59VG1_CANAL	47 kDa	0	0	7	0	0	0
625.2	Putative uncharacterized protein LYS211 OS=Candida albicans (strain SC5314 / ATCC MYA-2876) GN=LYS22 PE=3 SV=1	Q59TC4_CANAL	46 kDa	0	0	5	0	0	0
626	Malate dehydrogenase, cytoplasmic OS=Candida albicans (strain SC5314 / ATCC MYA-2876) GN=MDH1 PE=1 SV=2	MDHC_CANAL	36 kDa	0	0	7	0	0	0
627	Likely mitochondrial ribosomal protein L1 OS=Candida albicans (strain SC5314 / ATCC MYA-2876) GN=MRPL1 PE=4 SV=1	Q59LA1_CANAL	30 kDa	0	0	4	0	0	1
628	Coatomer subunit gamma OS=Candida albicans (strain SC5314 / ATCC MYA-2876) GN=SEC21 PE=3 SV=1	Q59VH4_CANAL	104 kDa	0	0	4	0	0	0
629	Potential cytosolic chaperonin CCT ring complex subunit Cct2 OS=Candida albicans (strain SC5314 / ATCC MYA-2876) GN=CCT2 PE=3 SV=1	Q59YC4_CANAL	57 kDa	0	0	8	0	0	0
630	Putative uncharacterized protein OS=Candida albicans (strain SC5314 / ATCC MYA-2876) GN=RNR21 PE=4 SV=1	Q5A0L0_CANAL	47 kDa	0	0	5	0	0	0
631	Potential heat shock protein regulator OS=Candida albicans (strain SC5314 / ATCC MYA-2876) GN=HCH1 PE=4 SV=1	Q5A4P6_CANAL	17 kDa	0	1	4	0	2	0
632	Likely thioredoxin peroxidase OS=Candida albicans (strain SC5314 / ATCC MYA-2876) GN=PRX1 PE=4 SV=1	Q5A5A0_CANAL	27 kDa	0	0	3	0	0	0
633	Putative uncharacterized protein GLN4 OS=Candida albicans (strain SC5314 / ATCC MYA-2876) GN=GLN4 PE=3 SV=1	Q5AFK4_CANAL	91 kDa	0	0	5	0	0	0
634	Putative uncharacterized protein OS=Candida albicans (strain SC5314 / ATCC MYA-2876) GN=CaO19.10571 PE=4 SV=1	Q5AHZ9_CANAL	20 kDa	0	0	7	0	0	0
635	Potential cytoplasmic methionyl tRNA synthetase OS=Candida albicans (strain SC5314 / ATCC MYA-2876) GN=MES1 PE=3 SV=1	Q5AK65_CANAL	85 kDa	0	0	6	0	0	0
636	Putative uncharacterized protein RPC40 OS=Candida albicans (strain SC5314 / ATCC MYA-2876) GN=RPC40 PE=4 SV=1	Q59ZF5_CANAL	42 kDa	0	1	3	0	0	1
637	Potential mitochondrial ribosomal protein S21 OS=Candida albicans (strain SC5314 / ATCC MYA-2876) GN=MRP21 PE=4 SV=1	Q5A1Z1_CANAL	23 kDa	0	0	3	0	0	0
638	Likely 26S proteasome regulatory particle ATPase Rpt6p OS=Candida albicans (strain SC5314 / ATCC MYA-2876) GN=RPT6 PE=4 SV=1	Q59Y56_CANAL (+1)	45 kDa	0	0	3	0	0	0
639	Ribonucleoside-diphosphate reductase OS=Candida albicans (strain SC5314 / ATCC MYA-2876) GN=RNR1 PE=3 SV=1	Q5A0N3_CANAL	96 kDa	0	0	2	0	0	0
640	Putative uncharacterized protein RSC8 OS=Candida albicans (strain SC5314 / ATCC MYA-2876) GN=RSC8 PE=4 SV=1	Q59ZV7_CANAL	64 kDa	0	0	1	0	0	0
641	Putative uncharacterized protein SEC27 OS=Candida albicans (strain SC5314 / ATCC MYA-2876) GN=SEC27 PE=4 SV=1	Q59S73_CANAL	106 kDa	0	0	1	0	0	0
642	Potential assimilatory sulfite reductase subunit OS=Candida albicans (strain SC5314 / ATCC MYA-2876) GN=MET10 PE=4 SV=1	Q59X55_CANAL	122 kDa	0	0	0	0	0	0
643	Putative uncharacterized protein OS=Candida albicans (strain SC5314 / ATCC MYA-2876) GN=CaO19.11181 PE=4 SV=1	Q59LZ8_CANAL-DECOY	?	0	0	0	0	0	0
644	Potential aspartate aminotransferase OS=Candida albicans (strain SC5314 / ATCC MYA-2876) GN=AAT1 PE=4 SV=1	Q59ZG5_CANAL-DECOY (+1)	?	0	0	0	0	0	0
645	Putative uncharacterized protein OS=Candida albicans (strain SC5314 / ATCC MYA-2876) GN=CaO19.6469 PE=4 SV=1	Q5AIP8_CANAL-DECOY	?	0	0	0	0	0	1
646	Potential nuclear DNA repair complex SMC ATPase OS=Candida albicans (strain SC5314 / ATCC MYA-2876) GN=SMC5 PE=4 SV=1	Q59UE8_CANAL	124 kDa	0	0	0	0	0	1
647	Structure-specific endonuclease subunit SLX1 OS=Candida albicans (strain SC5314 / ATCC MYA-2876) GN=SLX1 PE=3 SV=1	Q5A4X4_CANAL-DECOY	?	0	0	0	0	0	1
648	Potential ubiquitin-protein ligase OS=Candida albicans (strain SC5314 / ATCC MYA-2876) GN=UFD4 PE=4 SV=1	Q5A892_CANAL-DECOY	?	0	0	0	0	0	0
649	Likely acetyl CoA synthetase Acs1p OS=Candida albicans (strain SC5314 / ATCC MYA-2876) GN=ACS1 PE=4 SV=1	Q59XW4_CANAL	75 kDa	0	0	0	0	0	1
650	Putative uncharacterized protein OS=Candida albicans (strain SC5314 / ATCC MYA-2876) GN=CaO19.438 PE=4 SV=1	Q5A2A3_CANAL	65 kDa	0	1	0	0	0	0
651	Cluster of Putative uncharacterized protein OS=Candida albicans (strain SC5314 / ATCC MYA-2876) GN=CaO19.3360 PE=4 SV=1 (Q5A8X4_CANAL)	Q5A8X4_CANAL	74 kDa	0	0	0	0	0	1
651.1	Putative uncharacterized protein OS=Candida albicans (strain SC5314 / ATCC MYA-2876) GN=CaO19.3360 PE=4 SV=1	Q5A8X4_CANAL	74 kDa	0	0	0	0	0	1
652	Flavohemoprotein OS=Candida albicans (strain SC5314 / ATCC MYA-2876) GN=YHB1 PE=2 SV=1	FHP_CANAL	46 kDa	0	0	5	0	0	0
653	Putative uncharacterized protein SUP35 OS=Candida albicans (strain SC5314 / ATCC MYA-2876) GN=SUP35 PE=4 SV=1	Q59YE8_CANAL	80 kDa	0	0	4	0	0	0
654	Putative uncharacterized protein HPT1 OS=Candida albicans (strain SC5314 / ATCC MYA-2876) GN=HPT1 PE=4 SV=1	Q5A0H9_CANAL	24 kDa	0	0	7	0	0	0
655	Likely 26S proteasome regulatory particle ATPase Rpt1p OS=Candida albicans (strain SC5314 / ATCC MYA-2876) GN=RPT1 PE=4 SV=1	Q5A2A0_CANAL	50 kDa	0	0	3	0	0	0
656	Likely mitochondrial ribosomal protein (E. coli S2) OS=Candida albicans (strain SC5314 / ATCC MYA-2876) GN=MRP4 PE=3 SV=1	Q5A8K1_CANAL	52 kDa	0	0	3	0	0	1
657	Potential mitochondrial Complex I, B13_NDUFA5 subunit OS=Candida albicans (strain SC5314 / ATCC MYA-2876) GN=CaO19.10102 PE=4 SV=1	Q5A995_CANAL	16 kDa	0	0	3	0	0	2
658	Putative uncharacterized protein ILV3 OS=Candida albicans (strain SC5314 / ATCC MYA-2876) GN=ILV3 PE=3 SV=1	Q5AJY2_CANAL	63 kDa	0	0	5	0	0	0
659	37S ribosomal protein S10, mitochondrial OS=Candida albicans (strain SC5314 / ATCC MYA-2876) GN=RSM10 PE=3 SV=1	RT10_CANAL	27 kDa	0	0	1	0	0	0
660	Putative uncharacterized protein OS=Candida albicans (strain SC5314 / ATCC MYA-2876) GN=CaO19.1250 PE=4 SV=1	Q5A460_CANAL	37 kDa	0	1	2	0	1	1
661	Potential mitochondrial Complex I, LYR_B22_NDUFB9 subunit OS=Candida albicans (strain SC5314 / ATCC MYA-2876) GN=CaO19.5547 PE=4 SV=1	Q5AC03_CANAL (+1)	12 kDa	0	0	1	0	0	0
662	Putative uncharacterized protein OS=Candida albicans (strain SC5314 / ATCC MYA-2876) GN=CaO19.7494 PE=4 SV=1	Q5AAJ6_CANAL-DECOY	?	0	0	0	0	0	0
663	Protein BCP1 OS=Candida albicans (strain SC5314 / ATCC MYA-2876) GN=BCP1 PE=3 SV=1	BCP1_CANAL	37 kDa	0	0	2	0	0	1
664	Putative uncharacterized protein TFC4 OS=Candida albicans (strain SC5314 / ATCC MYA-2876) GN=TFC4 PE=4 SV=1	Q5AEX9_CANAL-DECOY	?	0	0	0	0	0	0
665	Potential esterase/lipase/thioesterase/phosphatase OS=Candida albicans (strain SC5314 / ATCC MYA-2876) GN=CaO19.782 PE=4 SV=1	Q59VF1_CANAL	73 kDa	0	0	0	0	0	0
666	Mannan endo-1,6-alpha-mannosidase DCW1 OS=Candida albicans (strain SC5314 / ATCC MYA-2876) GN=DCW1 PE=1 SV=1	DCW1_CANAL	50 kDa	0	1	0	0	1	0
667	DNA polymerase OS=Candida albicans (strain SC5314 / ATCC MYA-2876) GN=POL2 PE=3 SV=1	Q59SM7_CANAL	256 kDa	0	1	0	0	0	0
668	Putative uncharacterized protein OS=Candida albicans (strain SC5314 / ATCC MYA-2876) GN=CaO19.7588 PE=4 SV=1	Q5ACQ4_CANAL	31 kDa	0	0	0	0	2	1
669	Likely GTP/GDP exchange factor for ARF OS=Candida albicans (strain SC5314 / ATCC MYA-2876) GN=SEC7 PE=4 SV=1	Q5ANF9_CANAL-DECOY	?	0	0	0	0	0	1
670	Putative uncharacterized protein SPA2 OS=Candida albicans (strain SC5314 / ATCC MYA-2876) GN=SPA2 PE=4 SV=1	Q59PD2_CANAL-DECOY	?	0	0	0	0	0	0
671	Putative uncharacterized protein OS=Candida albicans (strain SC5314 / ATCC MYA-2876) GN=CaO19.13553 PE=4 SV=1	Q59RT7_CANAL-DECOY	?	0	0	0	0	0	1
672	Putative uncharacterized protein GAD1 OS=Candida albicans (strain SC5314 / ATCC MYA-2876) GN=GAD1 PE=3 SV=1	Q59TY0_CANAL-DECOY	?	0	0	0	0	0	0
673	Putative uncharacterized protein ISW1 OS=Candida albicans (strain SC5314 / ATCC MYA-2876) GN=ISW1 PE=4 SV=1	Q59WD2_CANAL	101 kDa	0	0	0	0	0	0
674	Putative uncharacterized protein OS=Candida albicans (strain SC5314 / ATCC MYA-2876) GN=CaO19.12418 PE=4 SV=1	Q5AL24_CANAL-DECOY	?	0	0	0	0	0	0
675	Cluster of Putative uncharacterized protein ADE5,7 OS=Candida albicans (strain SC5314 / ATCC MYA-2876) GN=ADE5,7 PE=3 SV=1 (Q5A7A0_CANAL)	Q5A7A0_CANAL	86 kDa	0	0	7	0	0	0
675.1	Putative uncharacterized protein ADE5,7 OS=Candida albicans (strain SC5314 / ATCC MYA-2876) GN=ADE5,7 PE=3 SV=1	Q5A7A0_CANAL	86 kDa	0	0	7	0	0	0
676	Acetyl-CoA hydrolase OS=Candida albicans (strain SC5314 / ATCC MYA-2876) GN=ACH1 PE=1 SV=2	ACH1_CANAL	58 kDa	0	0	4	0	0	0
677	GMP synthase [glutamine-hydrolyzing] OS=Candida albicans (strain SC5314 / ATCC MYA-2876) GN=GUA1 PE=3 SV=1	GUAA_CANAL	59 kDa	0	0	7	0	0	0
678	Adenylate kinase isoenzyme 6 homolog HBR1 OS=Candida albicans (strain SC5314 / ATCC MYA-2876) GN=HBR1 PE=2 SV=1	KAD6_CANAL	29 kDa	0	2	3	0	1	1
679	Peptidyl-prolyl cis-trans isomerase D OS=Candida albicans (strain SC5314 / ATCC MYA-2876) GN=CPR6 PE=3 SV=2	PPID_CANAL	41 kDa	0	0	5	0	0	0
680	Putative uncharacterized protein ADE6 OS=Candida albicans (strain SC5314 / ATCC MYA-2876) GN=ADE6 PE=4 SV=1	Q59MZ5_CANAL	151 kDa	0	0	4	0	0	0
681	Likely succinyl-CoA synthetase beta-subunit OS=Candida albicans (strain SC5314 / ATCC MYA-2876) GN=LSC2 PE=4 SV=1	Q59PZ0_CANAL	13 kDa	0	0	5	0	0	1
682	Potential multicopper ferro-O2-oxidoreductase OS=Candida albicans (strain SC5314 / ATCC MYA-2876) GN=FET35 PE=4 SV=1	Q59RJ8_CANAL	45 kDa	0	3	0	0	0	1
683	Putative uncharacterized protein GAD1 OS=Candida albicans (strain SC5314 / ATCC MYA-2876) GN=GAD1 PE=3 SV=1	Q59TY0_CANAL	64 kDa	0	0	5	0	0	0
684	Putative uncharacterized protein OS=Candida albicans (strain SC5314 / ATCC MYA-2876) GN=CaO19.13116 PE=4 SV=1	Q59UQ0_CANAL	90 kDa	0	0	0	0	0	0
685	Putative uncharacterized protein HIS4 OS=Candida albicans (strain SC5314 / ATCC MYA-2876) GN=HIS4 PE=3 SV=1	Q59UT2_CANAL	92 kDa	0	0	5	0	0	0
686	Potential cytosolic chaperonin CCT ring complex subunit Cct8 OS=Candida albicans (strain SC5314 / ATCC MYA-2876) GN=CCT8 PE=3 SV=1	Q5AB74_CANAL	58 kDa	0	0	6	0	0	1
687	Likely mitochondrial ribosomal protein (E. coli L4) OS=Candida albicans (strain SC5314 / ATCC MYA-2876) GN=YML6 PE=4 SV=1	Q5AFP9_CANAL	32 kDa	0	0	3	0	0	0
688	Potential translation initiation factor eIF3-epsilon-p47 subunit OS=Candida albicans (strain SC5314 / ATCC MYA-2876) GN=CaO19.11759 PE=4 SV=1	Q5AG96_CANAL	37 kDa	0	0	3	0	1	0
689	Putative uncharacterized protein FRS2 OS=Candida albicans (strain SC5314 / ATCC MYA-2876) GN=FRS2 PE=4 SV=1	Q5AI93_CANAL	56 kDa	0	0	7	0	0	0
690	Putative uncharacterized protein OS=Candida albicans (strain SC5314 / ATCC MYA-2876) GN=CaO19.1549 PE=4 SV=1	Q5ALM8_CANAL	29 kDa	0	0	3	0	0	0
691	Potential SET3 histone deacetylase complex ankyrin repeat protein Hos4p OS=Candida albicans (strain SC5314 / ATCC MYA-2876) GN=HOS4 PE=4 SV=1	Q5APN7_CANAL	155 kDa	0	0	0	0	0	0
692	FK506-binding protein 1 OS=Candida albicans (strain SC5314 / ATCC MYA-2876) GN=RBP1 PE=3 SV=2	FKBP_CANAL	13 kDa	0	0	3	0	0	0
693	Likely mitochondrial ribosomal protein L15 OS=Candida albicans (strain SC5314 / ATCC MYA-2876) GN=MRPL152 PE=4 SV=1	Q59M32_CANAL	25 kDa	0	0	0	0	0	0
694	Potential mitochondrial ribosomal protein S13 OS=Candida albicans (strain SC5314 / ATCC MYA-2876) GN=MRPS13 PE=3 SV=1	Q5A357_CANAL	14 kDa	0	0	2	0	0	1
695	Putative uncharacterized protein OS=Candida albicans (strain SC5314 / ATCC MYA-2876) GN=CaO19.6175 PE=4 SV=1	Q59MJ8_CANAL	25 kDa	1	2	1	2	1	1
696	Putative uncharacterized protein OS=Candida albicans (strain SC5314 / ATCC MYA-2876) GN=GLN3 PE=4 SV=1	Q5AKA8_CANAL	74 kDa	0	0	0	1	0	1
697	Putative uncharacterized protein OS=Candida albicans (strain SC5314 / ATCC MYA-2876) GN=CaO19.199 PE=4 SV=1	Q59SE6_CANAL	58 kDa	0	2	0	0	1	2
698	Guanosine-diphosphatase OS=Candida albicans (strain SC5314 / ATCC MYA-2876) GN=GDA1 PE=3 SV=1	GDA1_CANAL	66 kDa	0	0	0	1	0	0
699	Putative uncharacterized protein OS=Candida albicans (strain SC5314 / ATCC MYA-2876) GN=CaO19.1657 PE=4 SV=1	Q5AJD4_CANAL	12 kDa	0	2	0	1	0	0
700	Potential DnaJ-like mitochondrial co-chaperone OS=Candida albicans (strain SC5314 / ATCC MYA-2876) GN=MDJ1 PE=3 SV=1	Q59NY3_CANAL	53 kDa	0	1	0	0	0	0
701	Putative uncharacterized protein OS=Candida albicans (strain SC5314 / ATCC MYA-2876) GN=CaO19.816 PE=4 SV=1	Q5AHI0_CANAL	201 kDa	0	1	0	0	0	0
702	Hypothetical LPF family protein 2 (Fragment) OS=Candida albicans (strain SC5314 / ATCC MYA-2876) GN=LPF2 PE=4 SV=1	Q59JP8_CANAL-DECOY	?	0	1	0	0	0	0
703	Autophagy-related protein 2 OS=Candida albicans (strain SC5314 / ATCC MYA-2876) GN=ATG2 PE=3 SV=1	ATG2_CANAL-DECOY	?	0	0	0	0	0	0
704	Putative uncharacterized protein SEC10 OS=Candida albicans (strain SC5314 / ATCC MYA-2876) GN=SEC10 PE=4 SV=1	Q5A111_CANAL	91 kDa	0	1	0	0	0	0
705	Hypothetical LPF family protein 4 OS=Candida albicans (strain SC5314 / ATCC MYA-2876) GN=LPF4 PE=4 SV=1	Q59LK3_CANAL-DECOY	?	0	1	0	0	0	0
706	Likely histidine kinase osmosensor and regulator Chk1p OS=Candida albicans (strain SC5314 / ATCC MYA-2876) GN=CHK1 PE=4 SV=1	Q5AHA0_CANAL-DECOY	?	0	0	0	0	0	1
707	Putative uncharacterized protein TIF5 OS=Candida albicans (strain SC5314 / ATCC MYA-2876) GN=TIF5 PE=4 SV=1	Q5AGB9_CANAL-DECOY	?	0	0	0	0	0	0
708	Putative uncharacterized protein VPS8 OS=Candida albicans (strain SC5314 / ATCC MYA-2876) GN=VPS8 PE=4 SV=1	Q5A7T0_CANAL-DECOY	?	0	0	0	0	0	1
709	Potential retrotransposon gag-like protein OS=Candida albicans (strain SC5314 / ATCC MYA-2876) GN=CaO19.13951 PE=4 SV=1	Q59R87_CANAL-DECOY	?	0	1	0	0	0	0
710	Potential zinc finger protein OS=Candida albicans (strain SC5314 / ATCC MYA-2876) GN=ADR1 PE=4 SV=1	Q5AF56_CANAL	160 kDa	0	0	0	0	0	0
711	Hyphal wall protein 2 OS=Candida albicans (strain SC5314 / ATCC MYA-2876) GN=HWP2 PE=1 SV=1	HWP2_CANAL-DECOY	?	0	0	0	0	0	2
712	Cluster of Likely valine-responsive mitochondrial acetolacetate synthase regulatory subunit OS=Candida albicans (strain SC5314 / ATCC MYA-2876) GN=ILV6 PE=4 SV=1 (Q5AMJ6_CANAL)	Q5AMJ6_CANAL	33 kDa	0	0	4	0	0	0
712.1	Likely valine-responsive mitochondrial acetolacetate synthase regulatory subunit OS=Candida albicans (strain SC5314 / ATCC MYA-2876) GN=ILV6 PE=4 SV=1	Q5AMJ6_CANAL	33 kDa	0	0	4	0	0	0
713	Cluster of Putative uncharacterized protein PHO23 OS=Candida albicans (strain SC5314 / ATCC MYA-2876) GN=PHO23 PE=4 SV=1 (Q59XU7_CANAL)	Q59XU7_CANAL	52 kDa	0	0	0	0	0	1
713.1	Putative uncharacterized protein PHO23 OS=Candida albicans (strain SC5314 / ATCC MYA-2876) GN=PHO23 PE=4 SV=1	Q59XU7_CANAL	52 kDa	0	0	0	0	0	1
714	Adenine phosphoribosyltransferase OS=Candida albicans (strain SC5314 / ATCC MYA-2876) GN=APT1 PE=3 SV=1	APT_CANAL	21 kDa	0	0	5	0	0	0
715	Nucleolar protein 16 OS=Candida albicans (strain SC5314 / ATCC MYA-2876) GN=NOP16 PE=3 SV=1	NOP16_CANAL	26 kDa	0	1	1	2	0	0
716	Potential cytosolic chaperonin CCT ring complex subunit Cct7 OS=Candida albicans (strain SC5314 / ATCC MYA-2876) GN=CCT7 PE=3 SV=1	Q59YH4_CANAL	60 kDa	0	0	5	0	0	0
717	Potential cytosolic chaperonin CCT ring complex subunit Cct6 OS=Candida albicans (strain SC5314 / ATCC MYA-2876) GN=CCT6 PE=3 SV=1	Q5A0X0_CANAL	61 kDa	0	0	6	0	0	0
718	Putative uncharacterized protein PDX3 OS=Candida albicans (strain SC5314 / ATCC MYA-2876) GN=PDX3 PE=4 SV=1	Q5A6K4_CANAL	31 kDa	0	0	2	0	0	0
719	Putative uncharacterized protein FUN11 OS=Candida albicans (strain SC5314 / ATCC MYA-2876) GN=DRG1 PE=4 SV=1	Q5A779_CANAL	40 kDa	0	0	4	0	0	0
720	Potential glutathione-dependent formaldehyde dehydrogenase OS=Candida albicans (strain SC5314 / ATCC MYA-2876) GN=SFA1 PE=4 SV=1	Q5ACP2_CANAL	27 kDa	0	0	8	0	0	0
721	Putative uncharacterized protein RFA1 OS=Candida albicans (strain SC5314 / ATCC MYA-2876) GN=RFA1 PE=4 SV=1	Q5ACX4_CANAL	70 kDa	0	0	2	1	0	0
722	Likely mitochondrial ribosomal protein MRPL35p OS=Candida albicans (strain SC5314 / ATCC MYA-2876) GN=MRPL35 PE=4 SV=1	Q5AHD3_CANAL	44 kDa	0	0	4	0	0	0
723	Branched-chain-amino-acid aminotransferase OS=Candida albicans (strain SC5314 / ATCC MYA-2876) GN=BAT21 PE=3 SV=1	Q5AHJ9_CANAL	44 kDa	0	0	5	0	0	0
724	Ribosome biogenesis protein YTM1 OS=Candida albicans (strain SC5314 / ATCC MYA-2876) GN=YTM1 PE=3 SV=1	YTM1_CANAL	52 kDa	0	0	3	0	0	0
725	Elongation factor G, mitochondrial OS=Candida albicans (strain SC5314 / ATCC MYA-2876) GN=MEF1 PE=3 SV=1	EFGM_CANAL	84 kDa	0	0	3	0	0	0
726	Potential fumarate reductase OS=Candida albicans (strain SC5314 / ATCC MYA-2876) GN=OSM1 PE=4 SV=1	Q59T35_CANAL	54 kDa	0	0	3	0	0	0
727	Likely mitochondrial ribosomal protein (E. coli L7/L12) OS=Candida albicans (strain SC5314 / ATCC MYA-2876) GN=MRPL12 PE=3 SV=1	Q59Z25_CANAL	19 kDa	0	0	3	1	0	0
728	Eukaryotic translation initiation factor 6 OS=Candida albicans (strain SC5314 / ATCC MYA-2876) GN=TIF6 PE=3 SV=1	IF6_CANAL	26 kDa	0	1	2	0	1	1
729	Likely mitochondrial ribosomal protein L32 OS=Candida albicans (strain SC5314 / ATCC MYA-2876) GN=MRPL32 PE=4 SV=1	Q5A6K5_CANAL	24 kDa	0	0	0	0	0	1
730	Uncharacterized protein OS=Candida albicans (strain SC5314 / ATCC MYA-2876) GN=ELF1 PE=3 SV=1	Q5A3X7_CANAL	134 kDa	0	0	3	0	0	0
731	tRNA ligase OS=Candida albicans (strain SC5314 / ATCC MYA-2876) GN=LIG1 PE=3 SV=2	TRNL_CANAL	96 kDa	0	0	0	0	0	0
732	Pheromone-regulated membrane protein 10 OS=Candida albicans (strain SC5314 / ATCC MYA-2876) GN=PRM10 PE=3 SV=1	PRM10_CANAL	121 kDa	0	0	0	0	0	0
733	Putative uncharacterized protein GIS2 OS=Candida albicans (strain SC5314 / ATCC MYA-2876) GN=GIS2 PE=4 SV=1	Q59YJ9_CANAL	19 kDa	0	1	1	0	1	1
734	Retrotransposon Tca5 polyprotein OS=Candida albicans (strain SC5314 / ATCC MYA-2876) GN=TCA5 PE=4 SV=1	Q59K02_CANAL-DECOY	?	0	1	0	0	0	0
735	Potential fungal zinc cluster transcription factor (Fragment) OS=Candida albicans (strain SC5314 / ATCC MYA-2876) GN=SEF2 PE=4 SV=1	Q5A1R9_CANAL-DECOY	?	0	0	0	0	0	1
736	Likely multifunctional urea amidolyase OS=Candida albicans (strain SC5314 / ATCC MYA-2876) GN=DUR1,2 PE=4 SV=1	Q59VF3_CANAL	200 kDa	0	0	0	0	0	1
737	Potential zinc finger protein OS=Candida albicans (strain SC5314 / ATCC MYA-2876) GN=CaO19.12493 PE=4 SV=1	Q5AKV1_CANAL	133 kDa	0	0	0	0	0	0
738	DNA-directed RNA polymerase OS=Candida albicans (strain SC5314 / ATCC MYA-2876) GN=RPA190 PE=3 SV=1	Q59LW3_CANAL-DECOY	?	0	0	0	0	0	0
739	Yeast-form wall Protein 1 OS=Candida albicans (strain SC5314 / ATCC MYA-2876) GN=YWP1 PE=1 SV=1	YWP1_CANAL	54 kDa	0	2	2	0	1	0
740	Putative uncharacterized protein OS=Candida albicans (strain SC5314 / ATCC MYA-2876) GN=CaO19.11314 PE=4 SV=1	Q5A658_CANAL-DECOY	?	0	0	0	0	0	0
741	Oxidation resistance protein 1 OS=Candida albicans (strain SC5314 / ATCC MYA-2876) GN=OXR1 PE=3 SV=1	OXR1_CANAL	39 kDa	0	1	0	0	0	0
742	Structural maintenance of chromosomes protein OS=Candida albicans (strain SC5314 / ATCC MYA-2876) GN=SMC4 PE=3 SV=1	Q5A4Y2_CANAL-DECOY	?	0	1	0	0	0	0
743	Putative uncharacterized protein OS=Candida albicans (strain SC5314 / ATCC MYA-2876) GN=CaO19.13871 PE=3 SV=1	Q5AH20_CANAL	73 kDa	0	0	0	0	0	0
744	Putative uncharacterized protein OS=Candida albicans (strain SC5314 / ATCC MYA-2876) GN=CaO19.1449 PE=4 SV=1	Q5ALX7_CANAL	26 kDa	0	0	0	0	0	1
745	Phosphorylase OS=Candida albicans (strain SC5314 / ATCC MYA-2876) GN=GPH1 PE=3 SV=1	Q5AFP7_CANAL-DECOY	?	0	0	0	0	0	0
746	Solute carrier family 25 member 38 homolog OS=Candida albicans (strain SC5314 / ATCC MYA-2876) GN=CaO19.1804 PE=3 SV=1	S2538_CANAL	40 kDa	0	0	0	0	0	0
747	Cluster of Potential pantothenate synthase OS=Candida albicans (strain SC5314 / ATCC MYA-2876) GN=PAN6 PE=4 SV=1 (Q5A228_CANAL)	Q5A228_CANAL	23 kDa	0	0	0	0	0	1
747.1	Potential pantothenate synthase OS=Candida albicans (strain SC5314 / ATCC MYA-2876) GN=PAN6 PE=4 SV=1	Q5A228_CANAL	23 kDa	0	0	0	0	0	1
748	Cluster of Likely protein kinase OS=Candida albicans (strain SC5314 / ATCC MYA-2876) GN=SSK2 PE=4 SV=1 (Q5A6J4_CANAL)	Q5A6J4_CANAL	168 kDa	0	0	0	0	0	0
748.1	Likely protein kinase OS=Candida albicans (strain SC5314 / ATCC MYA-2876) GN=SSK2 PE=4 SV=1	Q5A6J4_CANAL	168 kDa	0	0	0	0	0	0
749	Cluster of Potential NADH-dependent flavin oxidoreductase OS=Candida albicans (strain SC5314 / ATCC MYA-2876) GN=EBP1 PE=4 SV=1 (Q59WS6_CANAL)	Q59WS6_CANAL	46 kDa	0	0	8	0	0	0
749.1	Potential NADH-dependent flavin oxidoreductase OS=Candida albicans (strain SC5314 / ATCC MYA-2876) GN=EBP1 PE=4 SV=1	Q59WS6_CANAL	46 kDa	0	0	8	0	0	0
750	ATP-dependent RNA helicase DBP5 OS=Candida albicans (strain SC5314 / ATCC MYA-2876) GN=DBP5 PE=3 SV=1	DBP5_CANAL	60 kDa	0	0	5	0	0	0
751	Sterol 24-C-methyltransferase OS=Candida albicans (strain SC5314 / ATCC MYA-2876) GN=ERG6 PE=3 SV=1	ERG6_CANAL	43 kDa	0	0	2	0	0	0
752	Pyrroline-5-carboxylate reductase OS=Candida albicans (strain SC5314 / ATCC MYA-2876) GN=PRO3 PE=3 SV=1	Q59US1_CANAL (+1)	29 kDa	0	0	2	0	0	1
753	Putative uncharacterized protein SKP1 OS=Candida albicans (strain SC5314 / ATCC MYA-2876) GN=SKP1 PE=4 SV=1	Q59WE2_CANAL	19 kDa	0	0	0	0	0	0
754	Putative uncharacterized protein OS=Candida albicans (strain SC5314 / ATCC MYA-2876) GN=CaO19.448 PE=4 SV=1	Q5A294_CANAL	48 kDa	0	2	0	0	0	0
755	Likely mitochondrial ribosomal protein L7 (E. coli L5) OS=Candida albicans (strain SC5314 / ATCC MYA-2876) GN=MRPL7 PE=3 SV=1	Q5A2J2_CANAL	33 kDa	0	0	2	0	0	0
756	Putative uncharacterized protein OS=Candida albicans (strain SC5314 / ATCC MYA-2876) GN=SMI1 PE=4 SV=1	Q5A7A3_CANAL (+1)	61 kDa	0	1	3	0	0	1
757	Potential mitochondrial ribosomal protein RSM27p OS=Candida albicans (strain SC5314 / ATCC MYA-2876) GN=RSM27 PE=4 SV=1	Q5A937_CANAL	12 kDa	0	0	2	0	1	2
758	Putative uncharacterized protein PRO2 OS=Candida albicans (strain SC5314 / ATCC MYA-2876) GN=PRO2 PE=4 SV=1	Q5ADR2_CANAL	49 kDa	0	0	4	0	0	0
759	Putative uncharacterized protein OS=Candida albicans (strain SC5314 / ATCC MYA-2876) GN=CaO19.7085 PE=4 SV=1	Q5AFI3_CANAL	50 kDa	0	0	0	0	0	2
760	Thioredoxin reductase OS=Candida albicans (strain SC5314 / ATCC MYA-2876) GN=TRR1 PE=3 SV=1	Q5AG89_CANAL	35 kDa	0	0	7	0	0	0
761	Likely 26S proteasome regulatory particle subunit Rpn1p OS=Candida albicans (strain SC5314 / ATCC MYA-2876) GN=RPN1 PE=4 SV=1	Q5AL21_CANAL (+1)	110 kDa	0	0	3	0	0	0
762	Peptidyl-prolyl cis-trans isomerase OS=Candida albicans (strain SC5314 / ATCC MYA-2876) GN=CPR3 PE=3 SV=1	Q5ALM6_CANAL	21 kDa	0	0	5	0	0	2
763	Protein transport protein SEC13 OS=Candida albicans (strain SC5314 / ATCC MYA-2876) GN=SEC13 PE=1 SV=2	SEC13_CANAL	33 kDa	0	0	3	0	0	0
764	SEC14 cytosolic factor OS=Candida albicans (strain SC5314 / ATCC MYA-2876) GN=SEC14 PE=2 SV=1	SEC14_CANAL	35 kDa	0	0	4	0	0	0
765	Likely mitochondrial ribosomal protein (E. coli L14) OS=Candida albicans (strain SC5314 / ATCC MYA-2876) GN=MRPL38 PE=3 SV=1	Q59LB5_CANAL	15 kDa	0	2	2	0	0	2
766	Possible mitochondrial ribosomal large subunit protein MRP49p OS=Candida albicans (strain SC5314 / ATCC MYA-2876) GN=MRP49 PE=4 SV=1	Q5AH35_CANAL	18 kDa	0	0	3	0	1	1
767	S-methyl-5'-thioadenosine phosphorylase OS=Candida albicans (strain SC5314 / ATCC MYA-2876) GN=MEU1 PE=3 SV=1	MTAP_CANAL	38 kDa	0	0	3	0	0	0
768	Possible bud neck localizing protein phosphatase subunit Bni4p OS=Candida albicans (strain SC5314 / ATCC MYA-2876) GN=BNI4 PE=4 SV=1	Q59QJ2_CANAL	183 kDa	0	0	0	0	0	0
769	Putative uncharacterized protein BNI5 OS=Candida albicans (strain SC5314 / ATCC MYA-2876) GN=BNI5 PE=4 SV=1	Q5A2W1_CANAL	41 kDa	0	2	0	0	1	0
770	Putative uncharacterized protein DPB4 OS=Candida albicans (strain SC5314 / ATCC MYA-2876) GN=DPB4 PE=4 SV=1	Q5ACX9_CANAL	29 kDa	0	0	0	0	0	0
771	Putative uncharacterized protein DAL80 OS=Candida albicans (strain SC5314 / ATCC MYA-2876) GN=GZF3 PE=4 SV=1	Q5A201_CANAL (+1)	76 kDa	0	0	0	0	0	1
772	Centromere/microtubule-binding protein CBF5 OS=Candida albicans (strain SC5314 / ATCC MYA-2876) GN=CBF5 PE=3 SV=1	CBF5_CANAL	54 kDa	0	2	1	0	0	0
773	Putative uncharacterized protein SPA2 OS=Candida albicans (strain SC5314 / ATCC MYA-2876) GN=SPA2 PE=4 SV=1	Q59PD2_CANAL	164 kDa	0	0	0	0	0	0
774	Putative uncharacterized protein OS=Candida albicans (strain SC5314 / ATCC MYA-2876) GN=FAV1 PE=4 SV=1	Q5A689_CANAL-DECOY (+1)	?	0	0	0	0	0	0
775	Potential EH Domains and Endocytosis protein OS=Candida albicans (strain SC5314 / ATCC MYA-2876) GN=CTA3 PE=4 SV=1	Q59TS9_CANAL	132 kDa	0	0	0	0	0	0
776	Squalene monooxygenase OS=Candida albicans (strain SC5314 / ATCC MYA-2876) GN=ERG1 PE=3 SV=1	ERG1_CANAL	55 kDa	0	0	1	0	0	0
777	Putative uncharacterized protein OS=Candida albicans (strain SC5314 / ATCC MYA-2876) GN=CaO19.7738 PE=4 SV=1	Q59WW0_CANAL	100 kDa	0	0	1	0	0	0
778	Pescadillo homolog OS=Candida albicans (strain SC5314 / ATCC MYA-2876) GN=NOP7 PE=1 SV=1	PESC_CANAL	68 kDa	0	0	1	0	0	0
779	Potential mitochondrial carrier family protein Yhm2 OS=Candida albicans (strain SC5314 / ATCC MYA-2876) GN=YHM2 PE=3 SV=1	Q59NH3_CANAL	33 kDa	0	0	2	0	0	0
780	Putative uncharacterized protein OS=Candida albicans (strain SC5314 / ATCC MYA-2876) GN=CaO19.12379 PE=4 SV=1	Q5AL64_CANAL-DECOY	?	0	0	0	0	0	0
781	Potential GTP/GDP exchange factor for ARF OS=Candida albicans (strain SC5314 / ATCC MYA-2876) GN=CaO19.13997 PE=4 SV=1	Q59R15_CANAL	118 kDa	0	0	0	0	0	0
782	Putative uncharacterized protein OS=Candida albicans (strain SC5314 / ATCC MYA-2876) GN=CaO19.11647 PE=4 SV=1	Q59T06_CANAL	75 kDa	0	0	0	0	0	0
783	Putative uncharacterized protein OS=Candida albicans (strain SC5314 / ATCC MYA-2876) GN=CaO19.2043 PE=4 SV=1	Q5AD24_CANAL	32 kDa	0	0	1	0	0	1
784	Putative uncharacterized protein YND1 OS=Candida albicans (strain SC5314 / ATCC MYA-2876) GN=YND1 PE=3 SV=1	Q5A1A4_CANAL	79 kDa	0	0	0	0	0	0
785	Potential anaphase-promoting complex subunit Apc5 OS=Candida albicans (strain SC5314 / ATCC MYA-2876) GN=APC5 PE=4 SV=1	Q59RA1_CANAL	93 kDa	0	0	0	0	0	0
786	Putative uncharacterized protein OS=Candida albicans (strain SC5314 / ATCC MYA-2876) GN=CaO19.7376 PE=4 SV=1	Q5A4F8_CANAL	87 kDa	0	1	0	0	0	0
787	Potential U3 snoRNP-associated helicase Ecm16 OS=Candida albicans (strain SC5314 / ATCC MYA-2876) GN=ECM16 PE=4 SV=1	Q5ACX7_CANAL	144 kDa	0	0	0	0	0	0
788	Putative uncharacterized protein OS=Candida albicans (strain SC5314 / ATCC MYA-2876) GN=CaO19.1314 PE=4 SV=1	Q59TM2_CANAL-DECOY (+1)	?	0	0	0	0	0	1
789	Malate synthase OS=Candida albicans (strain SC5314 / ATCC MYA-2876) GN=MLS1 PE=3 SV=1	Q5APD2_CANAL	63 kDa	0	0	0	0	0	0
790	Potential forkhead-like transcriptional regulator OS=Candida albicans (strain SC5314 / ATCC MYA-2876) GN=FHL1 PE=4 SV=1	Q59ZC8_CANAL-DECOY	?	0	0	0	0	0	0
791	Possible carboxymuconolactone decarboxylase OS=Candida albicans (strain SC5314 / ATCC MYA-2876) GN=CMD2 PE=4 SV=1	Q5A3J2_CANAL	38 kDa	0	1	0	0	0	0
792	Uncharacterized protein OS=Candida albicans (strain SC5314 / ATCC MYA-2876) GN=CaO19.10126 PE=4 SV=1	Q5A971_CANAL-DECOY	?	0	0	0	0	0	0
793	Putative uncharacterized protein OS=Candida albicans (strain SC5314 / ATCC MYA-2876) GN=CaO19.11806 PE=4 SV=1	Q5AGI7_CANAL-DECOY	?	0	0	0	0	0	1
794	Putative uncharacterized protein MSB1 (Fragment) OS=Candida albicans (strain SC5314 / ATCC MYA-2876) GN=MSB1 PE=4 SV=1	Q59KA9_CANAL (+1)	139 kDa	0	0	0	0	0	1
795	Hypothetical LPF family protein 13 OS=Candida albicans (strain SC5314 / ATCC MYA-2876) GN=LPF13 PE=4 SV=1	Q59TL0_CANAL	79 kDa	0	0	0	0	0	0
796	Putative uncharacterized protein GLC8 OS=Candida albicans (strain SC5314 / ATCC MYA-2876) GN=GLC8 PE=4 SV=1	Q5AF97_CANAL-DECOY	?	0	0	0	0	0	0
797	Cluster of Putative uncharacterized protein OS=Candida albicans (strain SC5314 / ATCC MYA-2876) GN=CaO19.8830 PE=4 SV=1 (Q5A464_CANAL)	Q5A464_CANAL [2]	114 kDa	0	0	0	0	0	0
797.1	Putative uncharacterized protein OS=Candida albicans (strain SC5314 / ATCC MYA-2876) GN=CaO19.8830 PE=4 SV=1	Q5A464_CANAL	114 kDa	0	0	0	0	0	0
797.2	Putative uncharacterized protein OS=Candida albicans (strain SC5314 / ATCC MYA-2876) GN=CaO19.1246 PE=4 SV=1	Q5A4B6_CANAL	114 kDa	0	0	0	0	0	0
798	Cluster of Putative uncharacterized protein KAP104 OS=Candida albicans (strain SC5314 / ATCC MYA-2876) GN=KAP104 PE=4 SV=1 (Q59ZG3_CANAL)	Q59ZG3_CANAL	107 kDa	0	0	0	0	0	0
798.1	Putative uncharacterized protein KAP104 OS=Candida albicans (strain SC5314 / ATCC MYA-2876) GN=KAP104 PE=4 SV=1	Q59ZG3_CANAL	107 kDa	0	0	0	0	0	0
799	Cluster of Putative uncharacterized protein OS=Candida albicans (strain SC5314 / ATCC MYA-2876) GN=TCO89 PE=4 SV=1 (Q59VH2_CANAL-DECOY)	Q59VH2_CANAL-DECOY	?	0	1	0	0	0	0
799.1	Putative uncharacterized protein OS=Candida albicans (strain SC5314 / ATCC MYA-2876) GN=TCO89 PE=4 SV=1	Q59VH2_CANAL-DECOY	?	0	1	0	0	0	0
800	Cluster of Likely hexokinase OS=Candida albicans (strain SC5314 / ATCC MYA-2876) GN=GLK1 PE=3 SV=1 (Q59TZ8_CANAL)	Q59TZ8_CANAL	52 kDa	0	0	6	0	0	0
800.1	Likely hexokinase OS=Candida albicans (strain SC5314 / ATCC MYA-2876) GN=GLK1 PE=3 SV=1	Q59TZ8_CANAL	52 kDa	0	0	6	0	0	0
801	Putative uncharacterized protein PEP1 OS=Candida albicans (strain SC5314 / ATCC MYA-2876) GN=PEP1 PE=4 SV=1	Q59M21_CANAL	151 kDa	0	0	0	0	0	0
802	Branched-chain-amino-acid aminotransferase OS=Candida albicans (strain SC5314 / ATCC MYA-2876) GN=BAT22 PE=3 SV=1	Q59YS9_CANAL	41 kDa	0	0	8	0	0	0
803	Putative uncharacterized protein VPS1 OS=Candida albicans (strain SC5314 / ATCC MYA-2876) GN=VPS1 PE=3 SV=1	Q5A1V4_CANAL	77 kDa	0	0	5	0	0	0
804	Putative uncharacterized protein HSP104 OS=Candida albicans (strain SC5314 / ATCC MYA-2876) GN=HSP104 PE=3 SV=1	Q5A376_CANAL	100 kDa	0	0	5	0	0	0
805	Putative uncharacterized protein OS=Candida albicans (strain SC5314 / ATCC MYA-2876) GN=CaO19.12699 PE=4 SV=1	Q5A3N5_CANAL	28 kDa	0	0	5	0	0	0
806	Uncharacterized protein OS=Candida albicans (strain SC5314 / ATCC MYA-2876) GN=VMA4 PE=3 SV=1	Q5A968_CANAL	24 kDa	0	0	4	0	0	0
807	Putative uncharacterized protein OS=Candida albicans (strain SC5314 / ATCC MYA-2876) GN=CaO19.251 PE=4 SV=1	Q5AEL7_CANAL (+1)	26 kDa	0	1	3	0	0	1
808	Putative uncharacterized protein GRE3 OS=Candida albicans (strain SC5314 / ATCC MYA-2876) GN=GRE3 PE=4 SV=1	Q5AG62_CANAL	42 kDa	0	0	7	0	0	0
809	Putative uncharacterized protein TOM20 OS=Candida albicans (strain SC5314 / ATCC MYA-2876) GN=TOM20 PE=4 SV=1	Q5AIA0_CANAL	19 kDa	0	1	3	0	0	0
810	Putative uncharacterized protein OS=Candida albicans (strain SC5314 / ATCC MYA-2876) GN=CaO19.12079 PE=4 SV=1	Q5AMN7_CANAL	27 kDa	0	0	7	0	0	0
811	Likely mitochondrial ribosomal protein L8 (E. coli L17) OS=Candida albicans (strain SC5314 / ATCC MYA-2876) GN=MRPL8 PE=3 SV=1	Q59RQ4_CANAL	29 kDa	0	1	1	0	0	1
812	Potential ARF GAP OS=Candida albicans (strain SC5314 / ATCC MYA-2876) GN=GLO3 PE=4 SV=1	Q5A7M1_CANAL	49 kDa	0	0	2	0	0	0
813	Putative uncharacterized protein DPB3 OS=Candida albicans (strain SC5314 / ATCC MYA-2876) GN=DPB3 PE=4 SV=1	Q5AHY9_CANAL	26 kDa	0	1	1	0	0	2
814	Putative uncharacterized protein PRD1 OS=Candida albicans (strain SC5314 / ATCC MYA-2876) GN=PRD1 PE=3 SV=1	Q5A2A7_CANAL	82 kDa	0	0	2	0	0	0
815	Putative uncharacterized protein RET2 OS=Candida albicans (strain SC5314 / ATCC MYA-2876) GN=RET2 PE=4 SV=1	Q5AGE3_CANAL	63 kDa	0	0	2	0	0	0
816	Putative uncharacterized protein COQ1 OS=Candida albicans (strain SC5314 / ATCC MYA-2876) GN=COQ1 PE=3 SV=1	Q5AAL1_CANAL	56 kDa	0	0	2	0	0	0
817	Putative uncharacterized protein CYC8 OS=Candida albicans (strain SC5314 / ATCC MYA-2876) GN=SSN6 PE=4 SV=1	Q5ADP3_CANAL	120 kDa	0	0	1	0	0	1
818	Putative uncharacterized protein RPC10 OS=Candida albicans (strain SC5314 / ATCC MYA-2876) GN=RPC10 PE=4 SV=1	Q59ZT6_CANAL	12 kDa	0	0	1	1	0	0
819	Putative uncharacterized protein SER2 OS=Candida albicans (strain SC5314 / ATCC MYA-2876) GN=SER2 PE=4 SV=1	Q5A0H3_CANAL	33 kDa	0	1	2	0	0	2
820	Ribosome biogenesis protein ALB1 OS=Candida albicans (strain SC5314 / ATCC MYA-2876) GN=ALB1 PE=3 SV=1	ALB1_CANAL	17 kDa	0	0	2	1	0	0
821	Putative uncharacterized protein YJU2 OS=Candida albicans (strain SC5314 / ATCC MYA-2876) GN=YJU2 PE=4 SV=1	Q5A7K1_CANAL	27 kDa	0	1	1	0	1	2
822	Putative uncharacterized protein OS=Candida albicans (strain SC5314 / ATCC MYA-2876) GN=CaO19.11453 PE=4 SV=1	Q5AK50_CANAL	28 kDa	0	2	0	0	0	1
823	Putative uncharacterized protein TAF14 OS=Candida albicans (strain SC5314 / ATCC MYA-2876) GN=TAF14 PE=4 SV=1	Q5AHJ8_CANAL	26 kDa	0	0	0	0	0	1
824	Potential dsRNA virus protection family member OS=Candida albicans (strain SC5314 / ATCC MYA-2876) GN=SKI3 PE=4 SV=1	Q5APB7_CANAL-DECOY	?	0	1	0	0	0	0
825	Aspartokinase OS=Candida albicans (strain SC5314 / ATCC MYA-2876) GN=HOM3 PE=3 SV=1	Q5A474_CANAL	60 kDa	0	0	1	0	0	0
826	Putative uncharacterized protein OS=Candida albicans (strain SC5314 / ATCC MYA-2876) GN=CaO19.5504 PE=4 SV=1	Q59LC6_CANAL	109 kDa	0	0	0	0	0	0
827	Putative uncharacterized protein OS=Candida albicans (strain SC5314 / ATCC MYA-2876) GN=CaO19.7664 PE=4 SV=1	Q5ACH8_CANAL	15 kDa	0	1	2	0	0	1
828	Potential ubiquitin-protein ligase OS=Candida albicans (strain SC5314 / ATCC MYA-2876) GN=UFD4 PE=4 SV=1	Q5A892_CANAL	193 kDa	0	0	0	0	0	1
829	Putative uncharacterized protein SNF2 OS=Candida albicans (strain SC5314 / ATCC MYA-2876) GN=SNF2 PE=4 SV=1	Q5ALP9_CANAL	194 kDa	0	0	1	0	0	0
830	Putative uncharacterized protein GLB OS=Candida albicans (strain SC5314 / ATCC MYA-2876) GN=GLB PE=4 SV=1	Q5A6P5_CANAL	55 kDa	0	0	1	0	0	0
831	Putative uncharacterized protein STB3 OS=Candida albicans (strain SC5314 / ATCC MYA-2876) GN=STB3 PE=4 SV=1	Q59SE2_CANAL	55 kDa	0	0	0	0	0	0
832	Poly(A) polymerase PAPalpha OS=Candida albicans (strain SC5314 / ATCC MYA-2876) GN=PAPALPHA PE=3 SV=1	PAP_CANAL	63 kDa	0	1	0	0	0	1
833	Likely translation initiation factor eIF2 gamma subunit OS=Candida albicans (strain SC5314 / ATCC MYA-2876) GN=GCD11 PE=4 SV=1	Q5AGF6_CANAL-DECOY	?	0	0	0	0	0	0
834	Extracellular glycosidase CRH12 OS=Candida albicans (strain SC5314 / ATCC MYA-2876) GN=CRH12 PE=1 SV=1	CRH12_CANAL	57 kDa	0	0	0	0	0	0
835	Hypothetical LPF family protein 15 OS=Candida albicans (strain SC5314 / ATCC MYA-2876) GN=LPF15 PE=4 SV=1	Q59PP1_CANAL-DECOY	?	0	3	0	0	0	0
836	Putative uncharacterized protein OS=Candida albicans (strain SC5314 / ATCC MYA-2876) GN=CaO19.8544 PE=4 SV=1	Q5A517_CANAL	51 kDa	0	0	0	0	0	1
837	Uridine kinase OS=Candida albicans (strain SC5314 / ATCC MYA-2876) GN=URK1 PE=3 SV=1	Q5ANN6_CANAL	62 kDa	0	0	0	0	0	0
838	Putative uncharacterized protein OS=Candida albicans (strain SC5314 / ATCC MYA-2876) GN=CaO19.12619 PE=4 SV=1	Q5A5C8_CANAL	12 kDa	0	0	0	0	0	1
839	Putative uncharacterized protein RAD24 OS=Candida albicans (strain SC5314 / ATCC MYA-2876) GN=RAD24 PE=4 SV=1	Q5AF80_CANAL-DECOY	?	0	0	0	0	0	0
840	Cluster of Potential WW domain protein OS=Candida albicans (strain SC5314 / ATCC MYA-2876) GN=IFU5 PE=4 SV=1 (Q5A998_CANAL)	Q5A998_CANAL [2]	26 kDa	0	1	0	0	0	4
840.1	Potential WW domain protein OS=Candida albicans (strain SC5314 / ATCC MYA-2876) GN=IFU5 PE=4 SV=1	Q5A998_CANAL	26 kDa	0	1	0	0	0	3
840.2	Potential WW domain protein OS=Candida albicans (strain SC5314 / ATCC MYA-2876) GN=IFU5 PE=4 SV=1	Q5A9J9_CANAL	26 kDa	0	0	0	0	0	3
841	Likely farnesyl diphosphate synthetase OS=Candida albicans (strain SC5314 / ATCC MYA-2876) GN=ERG20 PE=3 SV=1	Q59TD9_CANAL	41 kDa	0	0	3	0	0	0
842	Putative uncharacterized protein SPE3 OS=Candida albicans (strain SC5314 / ATCC MYA-2876) GN=SPE3 PE=3 SV=1	Q59Z50_CANAL	34 kDa	0	0	6	0	0	0
843	Potential COPI vesicle coat component OS=Candida albicans (strain SC5314 / ATCC MYA-2876) GN=RET3 PE=4 SV=1	Q5A006_CANAL	23 kDa	0	0	3	0	0	0
844	Nucleolar GTP-binding protein 1 OS=Candida albicans (strain SC5314 / ATCC MYA-2876) GN=NOG1 PE=3 SV=1	Q5A4F0_CANAL	74 kDa	0	1	1	0	0	0
845	Potential isopentenyl diphosphate isomerase OS=Candida albicans (strain SC5314 / ATCC MYA-2876) GN=IDI1 PE=4 SV=1	Q5AF31_CANAL	32 kDa	0	0	6	0	0	0
846	CTP synthase OS=Candida albicans (strain SC5314 / ATCC MYA-2876) GN=URA7 PE=3 SV=1	Q5AK79_CANAL	64 kDa	0	0	3	0	0	0
847	Histone H2A.Z OS=Candida albicans (strain SC5314 / ATCC MYA-2876) GN=HTZ1 PE=3 SV=3	H2AZ_CANAL	14 kDa	0	2	2	0	3	5
848	Potential mitochondrial ribosomal small subunit protein OS=Candida albicans (strain SC5314 / ATCC MYA-2876) GN=PET123 PE=4 SV=1	Q59NG6_CANAL	35 kDa	0	0	2	0	0	0
849	Putative uncharacterized protein OS=Candida albicans (strain SC5314 / ATCC MYA-2876) GN=CaO19.1236 PE=4 SV=1	Q5A473_CANAL	36 kDa	0	0	2	0	0	0
850	Potential mitochondrial ribosome recycling factor OS=Candida albicans (strain SC5314 / ATCC MYA-2876) GN=RRF1 PE=4 SV=1	Q5A6S7_CANAL	30 kDa	0	0	2	0	0	1
851	Likely 26S proteasome regulatory particle subunit Rpn8p OS=Candida albicans (strain SC5314 / ATCC MYA-2876) GN=RPN8 PE=4 SV=1	Q59YL2_CANAL (+1)	37 kDa	0	0	3	0	0	1
852	ATP-dependent RNA helicase DRS1 OS=Candida albicans (strain SC5314 / ATCC MYA-2876) GN=DRS1 PE=3 SV=1	DRS1_CANAL	69 kDa	0	2	2	0	0	0
853	Putative uncharacterized protein GCV2 OS=Candida albicans (strain SC5314 / ATCC MYA-2876) GN=GCV2 PE=4 SV=1	Q59QD3_CANAL (+1)	110 kDa	0	0	2	0	0	0
854	Putative uncharacterized protein MTF1 OS=Candida albicans (strain SC5314 / ATCC MYA-2876) GN=MTF1 PE=4 SV=1	Q5ALP7_CANAL	40 kDa	0	0	0	0	0	0
855	Putative uncharacterized protein DAL81 OS=Candida albicans (strain SC5314 / ATCC MYA-2876) GN=DAL81 PE=4 SV=1	Q5A876_CANAL	99 kDa	0	1	0	0	0	0
856	Cytochrome b-c1 complex subunit Rieske, mitochondrial OS=Candida albicans (strain SC5314 / ATCC MYA-2876) GN=RIP1 PE=3 SV=1	Q5ANK8_CANAL	17 kDa	0	1	2	0	1	1
857	Extracellular glycosidase UTR2 OS=Candida albicans (strain SC5314 / ATCC MYA-2876) GN=UTR2 PE=1 SV=1	UTR2_CANAL	52 kDa	0	2	1	0	0	0
858	Potential RNA Pol I transcription factor subunit Rrn11 OS=Candida albicans (strain SC5314 / ATCC MYA-2876) GN=RRN11 PE=4 SV=1	Q59U14_CANAL (+1)	80 kDa	0	0	0	0	0	1
859	Putative uncharacterized protein SLK19 OS=Candida albicans (strain SC5314 / ATCC MYA-2876) GN=SLK19 PE=4 SV=1	Q5AFC4_CANAL	94 kDa	0	1	0	0	0	0
860	Putative uncharacterized protein PMC1 OS=Candida albicans (strain SC5314 / ATCC MYA-2876) GN=PMC1 PE=3 SV=1	Q5AJ65_CANAL	134 kDa	0	0	0	0	1	0
861	Likely nucleolar ribosomal biogenesis factor BRX1p OS=Candida albicans (strain SC5314 / ATCC MYA-2876) GN=CSI2 PE=4 SV=1	Q5A3N8_CANAL (+1)	34 kDa	0	2	0	0	0	0
862	GDP-Man:Man(3)GlcNAc(2)-PP-Dol alpha-1,2-mannosyltransferase OS=Candida albicans (strain SC5314 / ATCC MYA-2876) GN=ALG11 PE=3 SV=1	ALG11_CANAL	71 kDa	0	0	0	0	0	0
863	Potential epsin-like clathrin-binding protein OS=Candida albicans (strain SC5314 / ATCC MYA-2876) GN=YAP180 PE=4 SV=1	Q59SI8_CANAL (+1)	76 kDa	0	1	0	0	0	1
864	Putative uncharacterized protein DLD2 OS=Candida albicans (strain SC5314 / ATCC MYA-2876) GN=AIP2 PE=4 SV=1	Q5AEG8_CANAL	58 kDa	0	0	1	0	0	0
865	Putative uncharacterized protein OS=Candida albicans (strain SC5314 / ATCC MYA-2876) GN=ECM1 PE=4 SV=1	Q5A633_CANAL	23 kDa	0	0	0	1	0	0
866	Putative uncharacterized protein OS=Candida albicans (strain SC5314 / ATCC MYA-2876) GN=CaO19.10868 PE=4 SV=1	Q5A9P7_CANAL-DECOY	?	0	0	0	0	0	0
867	Putative uncharacterized protein OS=Candida albicans (strain SC5314 / ATCC MYA-2876) GN=CaO19.7552 PE=4 SV=1	Q5ACU0_CANAL-DECOY	?	0	0	0	0	1	0
868	Potential Sin3.Rpd3 histone deacetylase complex component Sin3p OS=Candida albicans (strain SC5314 / ATCC MYA-2876) GN=SIN3 PE=4 SV=1	Q5ABF9_CANAL	128 kDa	0	0	0	0	0	0
869	Potential glycosyl hydrolase OS=Candida albicans (strain SC5314 / ATCC MYA-2876) GN=BGL2 PE=3 SV=1	Q5AMT2_CANAL	34 kDa	0	0	1	0	0	0
870	Putative uncharacterized protein EST1 OS=Candida albicans (strain SC5314 / ATCC MYA-2876) GN=EST1 PE=4 SV=1	Q5AJX4_CANAL-DECOY	?	0	0	0	0	0	0
871	Putative uncharacterized protein OS=Candida albicans (strain SC5314 / ATCC MYA-2876) GN=CaO19.13969 PE=4 SV=1	Q59PR7_CANAL-DECOY	?	0	1	0	0	0	0
872	Potential small subunit rRNA processome component OS=Candida albicans (strain SC5314 / ATCC MYA-2876) GN=NOP14 PE=4 SV=1	Q5ANE4_CANAL	97 kDa	0	0	0	0	0	0
873	Putative uncharacterized protein REG1 OS=Candida albicans (strain SC5314 / ATCC MYA-2876) GN=REG1 PE=4 SV=1	Q5ADJ2_CANAL-DECOY	?	0	0	0	0	0	0
874	Potential microtubule motor complex protein Kip1 OS=Candida albicans (strain SC5314 / ATCC MYA-2876) GN=KIP1 PE=3 SV=1	Q59U44_CANAL	103 kDa	0	1	0	0	0	0
875	Putative uncharacterized protein OS=Candida albicans (strain SC5314 / ATCC MYA-2876) GN=CaO19.11624 PE=4 SV=1	Q59NQ4_CANAL-DECOY	?	0	0	0	0	0	1
876	Putative uncharacterized protein DDI1 OS=Candida albicans (strain SC5314 / ATCC MYA-2876) GN=DDI1 PE=4 SV=1	Q59ZT3_CANAL	36 kDa	0	0	1	0	0	0
877	Putative uncharacterized protein OS=Candida albicans (strain SC5314 / ATCC MYA-2876) GN=CaO19.1893 PE=4 SV=1	Q59U58_CANAL-DECOY	?	0	0	0	0	0	0
878	Potential zinc finger protein OS=Candida albicans (strain SC5314 / ATCC MYA-2876) GN=ADR1 PE=4 SV=1	Q5AF56_CANAL-DECOY	?	0	0	0	0	0	1
879	Putative uncharacterized protein BEM2 OS=Candida albicans (strain SC5314 / ATCC MYA-2876) GN=BEM2 PE=4 SV=1	Q5AGW7_CANAL-DECOY	?	0	0	0	0	0	1
880	DNA-directed RNA polymerase OS=Candida albicans (strain SC5314 / ATCC MYA-2876) GN=CaO19.13852 PE=3 SV=1	Q5AH39_CANAL-DECOY	?	0	0	0	0	0	0
881	Putative uncharacterized protein SST2 OS=Candida albicans (strain SC5314 / ATCC MYA-2876) GN=SST2 PE=4 SV=1	Q5AGF7_CANAL	77 kDa	0	0	1	0	0	0
882	Agglutinin-like protein 7 OS=Candida albicans (strain SC5314 / ATCC MYA-2876) GN=ALS7 PE=1 SV=1	ALS7_CANAL-DECOY	?	0	0	0	0	0	0
883	Potential F box protein OS=Candida albicans (strain SC5314 / ATCC MYA-2876) GN=CaO19.13373 PE=4 SV=1	Q5ANF1_CANAL	52 kDa	0	0	0	0	1	0
884	Putative uncharacterized protein OS=Candida albicans (strain SC5314 / ATCC MYA-2876) GN=CaO19.13202 PE=4 SV=1	Q5A0N1_CANAL	76 kDa	0	2	0	0	0	0
885	Putative uncharacterized protein NEO1 (Fragment) OS=Candida albicans (strain SC5314 / ATCC MYA-2876) GN=NEO1 PE=4 SV=1	Q59VF0_CANAL	127 kDa	0	0	1	0	0	0
886	Potential TOR2 kinase complex component OS=Candida albicans (strain SC5314 / ATCC MYA-2876) GN=TSC11 PE=4 SV=1	Q59U04_CANAL-DECOY	?	0	1	0	0	0	0
887	Putative uncharacterized protein DCP2 OS=Candida albicans (strain SC5314 / ATCC MYA-2876) GN=DCP2 PE=4 SV=1	Q5A392_CANAL-DECOY	?	0	0	0	0	0	0
888	Cluster of Potential zinc-binding dehydrogenase OS=Candida albicans (strain SC5314 / ATCC MYA-2876) GN=IFR2 PE=4 SV=1 (Q59UG8_CANAL)	Q59UG8_CANAL	39 kDa	0	0	6	0	0	0
888.1	Potential zinc-binding dehydrogenase OS=Candida albicans (strain SC5314 / ATCC MYA-2876) GN=IFR2 PE=4 SV=1	Q59UG8_CANAL	39 kDa	0	0	6	0	0	0
889	T-complex protein 1 subunit alpha OS=Candida albicans (strain SC5314 / ATCC MYA-2876) GN=TCP1 PE=3 SV=1	Q59QB7_CANAL	60 kDa	0	0	0	0	0	0
890	Putative uncharacterized protein ADE13 OS=Candida albicans (strain SC5314 / ATCC MYA-2876) GN=ADE13 PE=4 SV=1	Q59V82_CANAL	54 kDa	0	0	3	0	0	0
891	Putative uncharacterized protein PGM2 OS=Candida albicans (strain SC5314 / ATCC MYA-2876) GN=PGM2 PE=3 SV=1	Q5A202_CANAL (+1)	62 kDa	0	0	4	0	0	0
892	Putative uncharacterized protein MVD1 OS=Candida albicans (strain SC5314 / ATCC MYA-2876) GN=MVD PE=4 SV=1	Q5AB68_CANAL	29 kDa	0	0	4	0	0	0
893	Small COPII coat GTPase SAR1 OS=Candida albicans (strain SC5314 / ATCC MYA-2876) GN=SAR1 PE=3 SV=2	SAR1_CANAL	21 kDa	0	0	4	0	0	0
894	DNA-directed RNA polymerase OS=Candida albicans (strain SC5314 / ATCC MYA-2876) GN=COP1 PE=3 SV=1	Q59M52_CANAL	129 kDa	0	0	0	0	0	0
895	Putative uncharacterized protein VMA10 OS=Candida albicans (strain SC5314 / ATCC MYA-2876) GN=VMA10 PE=4 SV=1	Q59U85_CANAL	13 kDa	0	0	2	0	0	0
896	Putative uncharacterized protein CDC3 OS=Candida albicans (strain SC5314 / ATCC MYA-2876) GN=CDC3 PE=3 SV=1	Q59VN8_CANAL	43 kDa	0	0	4	0	0	0
897	Putative uncharacterized protein SGT2 OS=Candida albicans (strain SC5314 / ATCC MYA-2876) GN=SGT2 PE=4 SV=1	Q5A0I8_CANAL	36 kDa	0	0	1	0	0	0
898	Potential ARF GAP OS=Candida albicans (strain SC5314 / ATCC MYA-2876) GN=GCS1 PE=4 SV=1	Q59VX5_CANAL	41 kDa	0	0	2	0	0	0
899	Likely 26S proteasome regulatory particle subunit Rpn6p OS=Candida albicans (strain SC5314 / ATCC MYA-2876) GN=RPN6 PE=4 SV=1	Q59TR9_CANAL	49 kDa	0	0	2	0	0	0
900	Putative uncharacterized protein HAP2 OS=Candida albicans (strain SC5314 / ATCC MYA-2876) GN=HAP2 PE=4 SV=1	Q5A480_CANAL (+1)	41 kDa	0	0	0	0	0	1
901	Putative uncharacterized protein OS=Candida albicans (strain SC5314 / ATCC MYA-2876) GN=CaO19.10846 PE=4 SV=1	Q5A8Z9_CANAL	22 kDa	0	0	2	0	0	0
902	Potential R3H single-stranded nucleic acid binding protein OS=Candida albicans (strain SC5314 / ATCC MYA-2876) GN=FGR44 PE=4 SV=1	Q5AND6_CANAL	47 kDa	1	2	0	1	0	0
903	Putative uncharacterized protein EMP24 OS=Candida albicans (strain SC5314 / ATCC MYA-2876) GN=EMP24 PE=3 SV=1	Q59V63_CANAL	23 kDa	0	0	2	0	0	1
904	Pre-mRNA-splicing factor CWC26 OS=Candida albicans (strain SC5314 / ATCC MYA-2876) GN=CWC26 PE=3 SV=1	CWC26_CANAL	32 kDa	0	1	2	0	0	0
905	Putative uncharacterized protein TFS1 OS=Candida albicans (strain SC5314 / ATCC MYA-2876) GN=TFS1 PE=4 SV=1	Q5A1M1_CANAL	29 kDa	0	0	1	0	1	0
906	Likely GCN4 translational activator Gcn1, OS=Candida albicans (strain SC5314 / ATCC MYA-2876) GN=GCN1 PE=4 SV=1	Q5A5R9_CANAL	177 kDa	0	0	1	0	0	0
907	Putative uncharacterized protein DNM1 OS=Candida albicans (strain SC5314 / ATCC MYA-2876) GN=DNM1 PE=3 SV=1	Q59YT6_CANAL	98 kDa	0	0	0	0	0	0
908	Putative uncharacterized protein USP1 OS=Candida albicans (strain SC5314 / ATCC MYA-2876) GN=USP1 PE=4 SV=1	Q5A0W0_CANAL	52 kDa	0	0	0	0	0	0
909	Putative uncharacterized protein OS=Candida albicans (strain SC5314 / ATCC MYA-2876) GN=USO5 PE=4 SV=1	Q5AEG2_CANAL	72 kDa	0	0	0	0	0	0
910	Likely EBNA-like pre-rRNA processing factor EBP2p OS=Candida albicans (strain SC5314 / ATCC MYA-2876) GN=EBP2 PE=4 SV=1	Q59TD8_CANAL	49 kDa	0	1	1	0	0	0
911	Formation of crista junctions protein 1 OS=Candida albicans (strain SC5314 / ATCC MYA-2876) GN=FCJ1 PE=3 SV=1	FCJ1_CANAL	63 kDa	0	0	1	0	0	0
912	Putative uncharacterized protein LUV1 OS=Candida albicans (strain SC5314 / ATCC MYA-2876) GN=LUV1 PE=4 SV=1	Q5AD60_CANAL	109 kDa	0	0	0	0	0	0
913	Putative uncharacterized protein CTF18 OS=Candida albicans (strain SC5314 / ATCC MYA-2876) GN=CTF18 PE=4 SV=1	Q5A889_CANAL	96 kDa	0	1	0	0	0	0
914	Putative uncharacterized protein VPS16 OS=Candida albicans (strain SC5314 / ATCC MYA-2876) GN=VPS16 PE=4 SV=1	Q59RB4_CANAL	109 kDa	0	0	0	0	0	0
915	Potential multicopper ferro-O2-oxidoreductase OS=Candida albicans (strain SC5314 / ATCC MYA-2876) GN=FET3 PE=4 SV=1	Q59NF9_CANAL	71 kDa	0	1	1	0	1	0
916	Hypothetical LPF family protein 33 OS=Candida albicans (strain SC5314 / ATCC MYA-2876) GN=LPF33 PE=4 SV=1	Q5A5E3_CANAL	85 kDa	0	1	0	0	0	0
917	Potential SET3 histone deacetylase complex component Set3p OS=Candida albicans (strain SC5314 / ATCC MYA-2876) GN=SET3 PE=4 SV=1	Q59ZX1_CANAL	120 kDa	0	0	0	0	0	0
918	Structural maintenance of chromosomes protein OS=Candida albicans (strain SC5314 / ATCC MYA-2876) GN=SMC1 PE=3 SV=1	Q5A021_CANAL	142 kDa	0	0	0	0	0	0
919	Putative uncharacterized protein OS=Candida albicans (strain SC5314 / ATCC MYA-2876) GN=CaO19.13443 PE=4 SV=1	Q5ABE8_CANAL	64 kDa	0	0	0	0	0	0
920	Likely mitochondrial carnitine transport protein OS=Candida albicans (strain SC5314 / ATCC MYA-2876) GN=CRC1 PE=3 SV=1	Q5A967_CANAL	30 kDa	0	1	1	0	0	0
921	Putative uncharacterized protein OS=Candida albicans (strain SC5314 / ATCC MYA-2876) GN=CaO19.13670 PE=4 SV=1	Q59N38_CANAL	111 kDa	0	1	0	0	0	0
922	Putative uncharacterized protein OS=Candida albicans (strain SC5314 / ATCC MYA-2876) GN=CaO19.11252 PE=4 SV=1	Q5A6C2_CANAL-DECOY	?	0	1	0	0	0	0
923	Putative uncharacterized protein OS=Candida albicans (strain SC5314 / ATCC MYA-2876) GN=CaO19.346 PE=4 SV=1	Q5AEC2_CANAL-DECOY	?	0	0	0	0	0	0
924	Lipase 10 OS=Candida albicans (strain SC5314 / ATCC MYA-2876) GN=LIP10 PE=3 SV=1	LIP10_CANAL	50 kDa	0	0	0	0	0	1
925	Putative uncharacterized protein PDS5 OS=Candida albicans (strain SC5314 / ATCC MYA-2876) GN=PDS5 PE=4 SV=1	Q5A2J0_CANAL-DECOY	?	0	0	0	0	0	0
926	Putative uncharacterized protein OS=Candida albicans (strain SC5314 / ATCC MYA-2876) GN=CaO19.13985 PE=3 SV=1	Q59R27_CANAL	132 kDa	0	1	0	0	0	0
927	Possible CCR4-NOT complex associated factor Caf120p OS=Candida albicans (strain SC5314 / ATCC MYA-2876) GN=CaO19.13221 PE=4 SV=1	Q5A0L2_CANAL	77 kDa	0	0	0	0	0	0
928	Putative uncharacterized protein SSL1 OS=Candida albicans (strain SC5314 / ATCC MYA-2876) GN=SSL1 PE=4 SV=1	Q5ALX0_CANAL	56 kDa	0	0	0	0	1	0
929	Probable amidase OS=Candida albicans (strain SC5314 / ATCC MYA-2876) GN=AMD22 PE=4 SV=1	Q5A5B1_CANAL-DECOY	?	0	0	0	0	0	0
930	Lon protease homolog 2, peroxisomal OS=Candida albicans (strain SC5314 / ATCC MYA-2876) GN=CaO19.6973 PE=3 SV=1	LONP2_CANAL	141 kDa	0	0	0	0	0	0
931	Potential HSF-type DNA binding transcription factor OS=Candida albicans (strain SC5314 / ATCC MYA-2876) GN=SFL1 PE=3 SV=1	Q5A287_CANAL	90 kDa	0	0	0	0	0	0
932	Putative uncharacterized protein ROM2 OS=Candida albicans (strain SC5314 / ATCC MYA-2876) GN=ROM2 PE=4 SV=1	Q5AH90_CANAL	157 kDa	0	0	0	0	0	0
933	Putative uncharacterized protein YAT2 OS=Candida albicans (strain SC5314 / ATCC MYA-2876) GN=CTN3 PE=4 SV=1	Q59MQ8_CANAL	101 kDa	0	0	0	0	0	0
934	Putative uncharacterized protein OS=Candida albicans (strain SC5314 / ATCC MYA-2876) GN=CaO19.800 PE=4 SV=1	Q5AHJ6_CANAL-DECOY	?	0	1	0	0	0	0
935	Potential forkhead-like transcriptional regulator OS=Candida albicans (strain SC5314 / ATCC MYA-2876) GN=FHL1 PE=4 SV=1	Q59Z64_CANAL (+1)	127 kDa	0	1	0	0	0	0
936	Putative uncharacterized protein STH1 OS=Candida albicans (strain SC5314 / ATCC MYA-2876) GN=STH1 PE=4 SV=1	Q5AEM9_CANAL-DECOY	?	0	0	0	0	0	0
937	Putative uncharacterized protein OS=Candida albicans (strain SC5314 / ATCC MYA-2876) GN=CaO19.7003 PE=4 SV=1	Q5AFR5_CANAL-DECOY	?	0	0	0	0	0	0
938	Potential ATP binding cassette protein OS=Candida albicans (strain SC5314 / ATCC MYA-2876) GN=MODF PE=4 SV=1	Q5AKU8_CANAL	62 kDa	0	1	0	0	0	0
939	Potential cytosolic chaperonin CCT ring complex subunit Cct5 OS=Candida albicans (strain SC5314 / ATCC MYA-2876) GN=CCT5 PE=3 SV=1	Q59Z12_CANAL	60 kDa	0	0	5	0	0	0
940	Putative uncharacterized protein GDI1 OS=Candida albicans (strain SC5314 / ATCC MYA-2876) GN=GDI1 PE=4 SV=1	Q59ZT0_CANAL	50 kDa	0	0	5	0	0	0
941	Potential ER dolichol phosphate mannose synthase OS=Candida albicans (strain SC5314 / ATCC MYA-2876) GN=DPM1 PE=4 SV=1	Q5A789_CANAL	27 kDa	0	0	2	0	0	0
942	Superoxide dismutase OS=Candida albicans (strain SC5314 / ATCC MYA-2876) GN=SOD2 PE=3 SV=1	Q5A8Z4_CANAL	26 kDa	0	0	3	0	0	0
943	Likely mitochondrial ribosomal protein L6 OS=Candida albicans (strain SC5314 / ATCC MYA-2876) GN=MRPL6 PE=3 SV=1	Q5AAK3_CANAL	26 kDa	0	0	0	0	0	0
944	Putative uncharacterized protein OS=Candida albicans (strain SC5314 / ATCC MYA-2876) GN=CaO19.13912 PE=4 SV=1	Q5AGX9_CANAL	35 kDa	0	0	4	0	0	0
945	Putative uncharacterized protein DYS1 OS=Candida albicans (strain SC5314 / ATCC MYA-2876) GN=DYS1 PE=4 SV=1	Q5AJG6_CANAL	45 kDa	0	0	3	0	0	0
946	Putative uncharacterized protein NCL1 OS=Candida albicans (strain SC5314 / ATCC MYA-2876) GN=NCL1 PE=4 SV=1	Q5A6N6_CANAL (+1)	81 kDa	0	0	3	0	0	0
947	Putative uncharacterized protein NOP2 OS=Candida albicans (strain SC5314 / ATCC MYA-2876) GN=NOP2 PE=4 SV=1	Q5A6Q3_CANAL	69 kDa	0	0	2	0	0	0
948	Likely H/ACA snoRNP component OS=Candida albicans (strain SC5314 / ATCC MYA-2876) GN=NHP2 PE=4 SV=1	Q5A6M9_CANAL	17 kDa	0	0	0	0	0	1
949	Putative uncharacterized protein OS=Candida albicans (strain SC5314 / ATCC MYA-2876) GN=CaO19.6607 PE=4 SV=1	Q59NK8_CANAL	24 kDa	0	0	1	0	0	0
950	Translation initiation factor IF-2 OS=Candida albicans (strain SC5314 / ATCC MYA-2876) GN=IFM1 PE=3 SV=1	Q5A5B3_CANAL	85 kDa	0	1	0	0	0	0
951	Putative uncharacterized protein VPH1 OS=Candida albicans (strain SC5314 / ATCC MYA-2876) GN=VPH1 PE=4 SV=1	Q59R99_CANAL	93 kDa	0	0	1	0	1	1
952	Potential mitochondrial ribosomal protein (E. coli L9) OS=Candida albicans (strain SC5314 / ATCC MYA-2876) GN=CaO19.2259 PE=4 SV=1	Q59Z41_CANAL	30 kDa	0	0	1	0	0	0
953	ATP-dependent RNA helicase MSS116, mitochondrial OS=Candida albicans (strain SC5314 / ATCC MYA-2876) GN=MSS116 PE=3 SV=1	MS116_CANAL	77 kDa	0	0	2	0	0	0
954	Potential mitochondrial Complex I, 17.2 kd subunit OS=Candida albicans (strain SC5314 / ATCC MYA-2876) GN=CaO19.1625 PE=4 SV=1	Q5AJG7_CANAL	16 kDa	0	1	1	0	0	0
955	Putative uncharacterized protein TOM22 OS=Candida albicans (strain SC5314 / ATCC MYA-2876) GN=TOM22 PE=4 SV=1	Q59LZ9_CANAL	17 kDa	0	0	2	0	0	2
956	Potential ER membrane P-type ATPase OS=Candida albicans (strain SC5314 / ATCC MYA-2876) GN=SPF1 PE=3 SV=1	Q59Q34_CANAL	137 kDa	0	0	0	0	0	0
957	Likely 26S proteasome regulatory particle subunit Rpn7p OS=Candida albicans (strain SC5314 / ATCC MYA-2876) GN=RPN7 PE=4 SV=1	Q5A421_CANAL	46 kDa	0	0	1	0	0	0
958	Putative uncharacterized protein GGA2 OS=Candida albicans (strain SC5314 / ATCC MYA-2876) GN=GGA2 PE=4 SV=1	Q5AI46_CANAL	65 kDa	0	0	1	0	0	0
959	Potential ferric reductase OS=Candida albicans (strain SC5314 / ATCC MYA-2876) GN=FRE7 PE=4 SV=1	Q59RP4_CANAL	46 kDa	0	2	2	0	1	0
960	ATP-dependent RNA helicase CHR1 OS=Candida albicans (strain SC5314 / ATCC MYA-2876) GN=CHR1 PE=3 SV=1	ROK1_CANAL	65 kDa	0	1	0	0	0	0
961	Putative uncharacterized protein GBP2 OS=Candida albicans (strain SC5314 / ATCC MYA-2876) GN=GBP2 PE=4 SV=1	Q5AFJ3_CANAL	33 kDa	0	1	2	0	1	0
962	Putative uncharacterized protein CDC50 OS=Candida albicans (strain SC5314 / ATCC MYA-2876) GN=CDC50 PE=4 SV=1	Q5A8L4_CANAL (+1)	46 kDa	0	1	0	0	0	1
963	Glutathione peroxidase OS=Candida albicans (strain SC5314 / ATCC MYA-2876) GN=GPS2 PE=3 SV=1	Q59WW7_CANAL	18 kDa	0	0	1	0	0	0
964	Potential SRPK1-like protein kinase OS=Candida albicans (strain SC5314 / ATCC MYA-2876) GN=SKY1 PE=4 SV=1	Q5AA48_CANAL	77 kDa	0	1	0	0	0	0
965	Putative uncharacterized protein RPC34 OS=Candida albicans (strain SC5314 / ATCC MYA-2876) GN=RPC34 PE=4 SV=1	Q5ABU2_CANAL	38 kDa	0	0	0	0	0	0
966	Chromatin modification-related protein EAF6 OS=Candida albicans (strain SC5314 / ATCC MYA-2876) GN=EAF6 PE=3 SV=1	EAF6_CANAL	23 kDa	0	0	0	0	0	1
967	Potential nucleoporin Nup1p OS=Candida albicans (strain SC5314 / ATCC MYA-2876) GN=NUP1 PE=4 SV=1	Q5A8P2_CANAL (+1)	123 kDa	0	1	0	0	0	1
968	Potential Rab guanyl-nucleotide exchange factor OS=Candida albicans (strain SC5314 / ATCC MYA-2876) GN=VAM6 PE=4 SV=1	Q5ALL1_CANAL	62 kDa	0	0	0	0	1	0
969	Enhancer of mRNA-decapping protein 1 OS=Candida albicans (strain SC5314 / ATCC MYA-2876) GN=EDC1 PE=3 SV=1	EDC1_CANAL	29 kDa	0	0	0	2	1	0
970	Putative uncharacterized protein ASE1 OS=Candida albicans (strain SC5314 / ATCC MYA-2876) GN=ASE1 PE=4 SV=1	Q5A4F7_CANAL-DECOY	?	0	1	0	0	0	0
971	3-isopropylmalate dehydratase OS=Candida albicans (strain SC5314 / ATCC MYA-2876) GN=LEU1 PE=3 SV=1	Q5AAJ1_CANAL-DECOY	?	0	0	0	0	0	0
972	Putative uncharacterized protein NPL6 OS=Candida albicans (strain SC5314 / ATCC MYA-2876) GN=NPL6 PE=4 SV=1	Q5AD12_CANAL	52 kDa	0	0	0	0	0	0
973	Putative uncharacterized protein OS=Candida albicans (strain SC5314 / ATCC MYA-2876) GN=CaO19.433 PE=4 SV=1	Q5A2A8_CANAL (+1)	65 kDa	0	0	0	0	0	0
974	Putative uncharacterized protein OS=Candida albicans (strain SC5314 / ATCC MYA-2876) GN=CaO19.10049 PE=4 SV=1	Q5A9X1_CANAL	84 kDa	0	0	0	0	0	0
975	Putative uncharacterized protein OS=Candida albicans (strain SC5314 / ATCC MYA-2876) GN=CaO19.13969 PE=4 SV=1	Q59PR7_CANAL	86 kDa	0	0	1	0	0	0
976	Putative uncharacterized protein HPD99 OS=Candida albicans (strain SC5314 / ATCC MYA-2876) GN=HPD99 PE=4 SV=1	Q59P37_CANAL	66 kDa	0	0	0	0	1	0
977	Likely mitochondrial ribosomal protein Rsm26p OS=Candida albicans (strain SC5314 / ATCC MYA-2876) GN=RSM26 PE=4 SV=1	Q5AK82_CANAL	31 kDa	0	0	0	0	0	0
978	ASTRA-associated protein 1 OS=Candida albicans (strain SC5314 / ATCC MYA-2876) GN=ASA1 PE=3 SV=1	ASA1_CANAL	43 kDa	0	0	0	0	0	0
979	Bud site selection protein BUD4 OS=Candida albicans (strain SC5314 / ATCC MYA-2876) GN=BUD4 PE=1 SV=2	BUD4_CANAL	193 kDa	0	0	0	0	0	0
980	Hypothetical LPF family protein 26 OS=Candida albicans (strain SC5314 / ATCC MYA-2876) GN=LPF26 PE=4 SV=1	Q59TC3_CANAL-DECOY	?	0	0	0	0	1	0
981	5-aminolevulinate synthase, mitochondrial OS=Candida albicans (strain SC5314 / ATCC MYA-2876) GN=HEM1 PE=3 SV=1	HEM1_CANAL	61 kDa	0	0	0	0	0	1
982	Hypothetical LPF family protein 5 OS=Candida albicans (strain SC5314 / ATCC MYA-2876) GN=LPF5 PE=4 SV=1	Q59JV0_CANAL	59 kDa	0	1	1	0	0	0
983	Putative uncharacterized protein OS=Candida albicans (strain SC5314 / ATCC MYA-2876) GN=IFA14 PE=4 SV=1	Q5ACU2_CANAL-DECOY	?	0	0	0	0	0	0
984	Likely protein kinase OS=Candida albicans (strain SC5314 / ATCC MYA-2876) GN=CaO19.12718 PE=4 SV=1	Q5A3L7_CANAL	84 kDa	0	0	0	0	0	0
985	Putative uncharacterized protein OS=Candida albicans (strain SC5314 / ATCC MYA-2876) GN=SWI1 PE=4 SV=1	Q59UR3_CANAL	111 kDa	0	0	0	0	0	0
986	Putative uncharacterized protein VPS16 OS=Candida albicans (strain SC5314 / ATCC MYA-2876) GN=VPS16 PE=4 SV=1	Q59RB4_CANAL-DECOY	?	0	0	0	0	0	0
987	Putative uncharacterized protein ECM17 (Fragment) OS=Candida albicans (strain SC5314 / ATCC MYA-2876) GN=ECM17 PE=4 SV=1	Q59P60_CANAL	86 kDa	0	0	1	0	0	0
988	Potential spliced, cell cycle-regulated protein OS=Candida albicans (strain SC5314 / ATCC MYA-2876) GN=SRC1 PE=4 SV=1	Q5ABY1_CANAL (+1)	79 kDa	0	1	0	1	0	0
989	Likely protein kinase OS=Candida albicans (strain SC5314 / ATCC MYA-2876) GN=BCK1 PE=4 SV=1	Q5A5B8_CANAL-DECOY	?	0	0	0	0	0	0
990	Lipoyl synthase, mitochondrial OS=Candida albicans (strain SC5314 / ATCC MYA-2876) GN=LAB5 PE=3 SV=1	LIPA_CANAL-DECOY	?	0	1	0	0	0	0
991	Putative uncharacterized protein OS=Candida albicans (strain SC5314 / ATCC MYA-2876) GN=CaO19.10521 PE=4 SV=1	Q5AI49_CANAL	141 kDa	0	0	1	0	0	0
992	Nucleolar protein 58 OS=Candida albicans (strain SC5314 / ATCC MYA-2876) GN=NOP58 PE=3 SV=1	NOP58_CANAL-DECOY	?	0	0	0	0	0	0
993	Heat shock protein 78, mitochondrial OS=Candida albicans (strain SC5314 / ATCC MYA-2876) GN=HSP78 PE=3 SV=1	HSP78_CANAL	92 kDa	0	0	0	0	0	0
994	Retroviral protease-like protein OS=Candida albicans (strain SC5314 / ATCC MYA-2876) GN=MKT1 PE=4 SV=1	Q5AFE1_CANAL-DECOY	?	0	0	0	0	0	1
995	Potential anaphase-promoting complex ubiquitin ligase subunit Apc1 OS=Candida albicans (strain SC5314 / ATCC MYA-2876) GN=APC1 PE=4 SV=1	Q5ABC4_CANAL-DECOY	?	0	0	0	0	1	0
996	Cluster of Putative uncharacterized protein OS=Candida albicans (strain SC5314 / ATCC MYA-2876) GN=CaO19.1512 PE=4 SV=1 (Q5AM62_CANAL-DECOY)	Q5AM62_CANAL-DECOY	?	0	0	0	0	0	0
996.1	Putative uncharacterized protein OS=Candida albicans (strain SC5314 / ATCC MYA-2876) GN=CaO19.1512 PE=4 SV=1	Q5AM62_CANAL-DECOY	?	0	0	0	0	0	0
997	Cytochrome c oxidase-assembly factor COX23, mitochondrial OS=Candida albicans (strain SC5314 / ATCC MYA-2876) GN=COX23 PE=3 SV=1	COX23_CANAL	16 kDa	1	0	0	3	0	0
998	Putative uncharacterized protein HIS7 OS=Candida albicans (strain SC5314 / ATCC MYA-2876) GN=HIS7 PE=3 SV=1	G1UB64_CANAL	70 kDa	0	0	4	0	0	0
999	Potential butanediol dehydrogenase OS=Candida albicans (strain SC5314 / ATCC MYA-2876) GN=IFE2 PE=3 SV=1	Q59KU9_CANAL	49 kDa	0	0	3	0	0	0
1000	Likely glutathione oxidoreductase OS=Candida albicans (strain SC5314 / ATCC MYA-2876) GN=GLR1 PE=3 SV=1	Q59NQ5_CANAL	56 kDa	0	0	3	0	0	0
1001	Phosphoserine aminotransferase OS=Candida albicans (strain SC5314 / ATCC MYA-2876) GN=SER1 PE=3 SV=1	Q59P52_CANAL	43 kDa	0	0	4	0	0	0
1002	Potential mitochondrial aconitase OS=Candida albicans (strain SC5314 / ATCC MYA-2876) GN=ACO2 PE=4 SV=1	Q59PT2_CANAL	86 kDa	0	0	4	0	0	0
1003	Putative uncharacterized protein OS=Candida albicans (strain SC5314 / ATCC MYA-2876) GN=FMA1 PE=3 SV=1	Q59RC5_CANAL	29 kDa	0	0	4	0	0	0
1004	O-acetylhomoserine O-acetylserine sulphydrylase OS=Candida albicans (strain SC5314 / ATCC MYA-2876) GN=MET15 PE=3 SV=1	Q59US5_CANAL	48 kDa	0	0	3	0	0	0
1005	Likely glycerol-3-phosphate dehydrogenase OS=Candida albicans (strain SC5314 / ATCC MYA-2876) GN=GPD1 PE=3 SV=1	Q59XU9_CANAL	44 kDa	0	0	3	0	0	0
1006	Likely 26S proteasome regulatory particle ATPase Rpt3p OS=Candida albicans (strain SC5314 / ATCC MYA-2876) GN=PR26 PE=4 SV=1	Q5A0L8_CANAL	46 kDa	0	0	2	0	0	0
1007	Putative uncharacterized protein HOT1 OS=Candida albicans (strain SC5314 / ATCC MYA-2876) GN=HOT1 PE=4 SV=1	Q5A906_CANAL	68 kDa	0	0	0	0	0	0
1008	Putative uncharacterized protein ADE1 OS=Candida albicans (strain SC5314 / ATCC MYA-2876) GN=ADE1 PE=3 SV=1	Q5AAK5_CANAL	33 kDa	0	0	6	0	0	0
1009	Putative uncharacterized protein PHZ1 OS=Candida albicans (strain SC5314 / ATCC MYA-2876) GN=PHZ1 PE=4 SV=1	Q5ABT0_CANAL (+1)	34 kDa	0	0	3	0	0	0
1010	Putative uncharacterized protein SNZ99 OS=Candida albicans (strain SC5314 / ATCC MYA-2876) GN=SNZ1 PE=3 SV=1	Q5AIA6_CANAL	32 kDa	0	0	3	0	0	0
1011	Protein transport protein SEC61 subunit alpha OS=Candida albicans (strain SC5314 / ATCC MYA-2876) GN=SEC61 PE=3 SV=2	SC61A_CANAL	53 kDa	0	0	2	0	0	0
1012	Potential polyamine N-acetyl tranferase (GNAT family) OS=Candida albicans (strain SC5314 / ATCC MYA-2876) GN=PAA11 PE=4 SV=1	Q59ZS3_CANAL	25 kDa	0	0	2	0	0	0
1013	ATPase GET3 OS=Candida albicans (strain SC5314 / ATCC MYA-2876) GN=GET3 PE=3 SV=1	GET3_CANAL	40 kDa	0	0	2	0	0	0
1014	Putative uncharacterized protein OS=Candida albicans (strain SC5314 / ATCC MYA-2876) GN=CaO19.7199 PE=4 SV=1	Q5A096_CANAL	19 kDa	0	1	2	0	0	0
1015	p100-like potential TFIIE-interacting transcriptional coactivator OS=Candida albicans (strain SC5314 / ATCC MYA-2876) GN=CAP100 PE=4 SV=1	Q5A3Y1_CANAL	100 kDa	0	0	2	0	0	0
1016	Likely mitochondrial ribosomal protein Rsm23p OS=Candida albicans (strain SC5314 / ATCC MYA-2876) GN=RSM23 PE=4 SV=1	Q59S60_CANAL	55 kDa	0	0	2	0	0	0
1017	Mitochondrial intermembrane space import and assembly protein 40 OS=Candida albicans (strain SC5314 / ATCC MYA-2876) GN=MIA40 PE=3 SV=2	MIA40_CANAL	28 kDa	0	0	2	0	0	0
1018	Putative uncharacterized protein OS=Candida albicans (strain SC5314 / ATCC MYA-2876) GN=CaO19.10344 PE=4 SV=1	Q5A217_CANAL	51 kDa	0	0	0	1	0	0
1019	Potential zinc finger transcription factor OS=Candida albicans (strain SC5314 / ATCC MYA-2876) GN=MIG1 PE=4 SV=1	Q5AG61_CANAL	63 kDa	0	0	0	0	0	2
1020	Putative uncharacterized protein OS=Candida albicans (strain SC5314 / ATCC MYA-2876) GN=CaO19.10502 PE=4 SV=1	Q5AI68_CANAL	19 kDa	0	0	1	1	0	0
1021	Protein transport protein SEC23 OS=Candida albicans (strain SC5314 / ATCC MYA-2876) GN=SEC23 PE=3 SV=1	SEC23_CANAL	86 kDa	0	0	2	0	0	0
1022	Pre-mRNA-splicing factor CWC15 OS=Candida albicans (strain SC5314 / ATCC MYA-2876) GN=CWC15 PE=3 SV=1	CWC15_CANAL	26 kDa	0	0	0	0	1	1
1023	Putative uncharacterized protein PCT1 OS=Candida albicans (strain SC5314 / ATCC MYA-2876) GN=PCT1 PE=4 SV=1	Q59SI6_CANAL	53 kDa	0	1	0	0	0	0
1024	Potential ultradian oscillation regulator OS=Candida albicans (strain SC5314 / ATCC MYA-2876) GN=GTS1 PE=4 SV=1	Q5A369_CANAL	48 kDa	0	1	0	0	0	0
1025	ATP-dependent RNA helicase DHH1 OS=Candida albicans (strain SC5314 / ATCC MYA-2876) GN=DHH1 PE=3 SV=1	DHH1_CANAL	62 kDa	0	0	2	0	0	0
1026	Putative uncharacterized protein OS=Candida albicans (strain SC5314 / ATCC MYA-2876) GN=CaO19.563 PE=4 SV=1	Q59JS3_CANAL	29 kDa	0	0	0	0	0	0
1027	Likely mitochondrial ribosomal large subunit protein IMG2p OS=Candida albicans (strain SC5314 / ATCC MYA-2876) GN=IMG2 PE=4 SV=1	Q5A6B3_CANAL (+1)	14 kDa	0	0	1	0	0	1
1028	TATA-box-binding protein OS=Candida albicans (strain SC5314 / ATCC MYA-2876) GN=TBP1 PE=2 SV=1	TBP_CANAL	27 kDa	0	0	1	0	0	0
1029	Putative uncharacterized protein OS=Candida albicans (strain SC5314 / ATCC MYA-2876) GN=CaO19.5648 PE=4 SV=1	Q59US2_CANAL	24 kDa	0	0	1	0	0	0
1030	Putative uncharacterized protein OS=Candida albicans (strain SC5314 / ATCC MYA-2876) GN=CaO19.4553 PE=4 SV=1	Q59L11_CANAL	78 kDa	0	0	0	0	0	0
1031	Putative uncharacterized protein OS=Candida albicans (strain SC5314 / ATCC MYA-2876) GN=CaO19.13486 PE=4 SV=1	Q5ABA5_CANAL	37 kDa	0	0	1	0	0	0
1032	Putative uncharacterized protein OS=Candida albicans (strain SC5314 / ATCC MYA-2876) GN=CaO19.2319 PE=4 SV=1	Q59WI3_CANAL (+1)	77 kDa	0	0	0	0	0	0
1033	Heat shock protein 78, mitochondrial OS=Candida albicans (strain SC5314 / ATCC MYA-2876) GN=HSP78 PE=3 SV=1	HSP78_CANAL-DECOY	?	0	0	0	0	0	0
1034	Putative uncharacterized protein OS=Candida albicans (strain SC5314 / ATCC MYA-2876) GN=CaO19.12358 PE=4 SV=1	Q5AP70_CANAL-DECOY	?	0	0	0	0	0	0
1035	Sulfate adenylyltransferase OS=Candida albicans (strain SC5314 / ATCC MYA-2876) GN=MET3 PE=3 SV=2	MET3_CANAL	59 kDa	0	0	2	0	0	0
1036	Transcription factor TBF1 OS=Candida albicans (strain SC5314 / ATCC MYA-2876) GN=TBF1 PE=1 SV=1	TBF1_CANAL	101 kDa	0	0	0	0	0	0
1037	Long chronological lifespan protein 2 OS=Candida albicans (strain SC5314 / ATCC MYA-2876) GN=LCL2 PE=3 SV=1	LCL2_CANAL	15 kDa	1	0	1	1	1	2
1038	Potential Rho protein GDP dissociation inhibitor OS=Candida albicans (strain SC5314 / ATCC MYA-2876) GN=RDI1 PE=4 SV=1	Q5AND4_CANAL	23 kDa	0	0	1	0	0	0
1039	Putative uncharacterized protein POS5 OS=Candida albicans (strain SC5314 / ATCC MYA-2876) GN=POS5 PE=3 SV=1	Q5ADP1_CANAL	57 kDa	0	0	0	0	0	0
1040	Putative uncharacterized protein MNN45 OS=Candida albicans (strain SC5314 / ATCC MYA-2876) GN=MNN4-4 PE=4 SV=1	Q5ABZ3_CANAL-DECOY	?	0	0	0	0	0	0
1041	Putative uncharacterized protein MSS2 OS=Candida albicans (strain SC5314 / ATCC MYA-2876) GN=MSS2 PE=4 SV=1	Q5AK19_CANAL-DECOY	?	0	0	0	0	0	0
1042	Putative uncharacterized protein RCL1 OS=Candida albicans (strain SC5314 / ATCC MYA-2876) GN=RCL1 PE=4 SV=1	Q59U65_CANAL (+1)	40 kDa	0	1	0	0	0	0
1043	Putative uncharacterized protein OS=Candida albicans (strain SC5314 / ATCC MYA-2876) GN=CaO19.1522 PE=4 SV=1	Q5AM55_CANAL	115 kDa	0	0	0	0	0	0
1044	Putative uncharacterized protein OS=Candida albicans (strain SC5314 / ATCC MYA-2876) GN=CaO19.1873 PE=4 SV=1	Q59U78_CANAL	12 kDa	0	0	1	0	1	1
1045	Putative uncharacterized protein OS=Candida albicans (strain SC5314 / ATCC MYA-2876) GN=CaO19.13124 PE=4 SV=1	Q5A8P7_CANAL-DECOY	?	0	0	0	0	0	0
1046	Possible mitochondrial ribosomal small subunit protein MRP1p OS=Candida albicans (strain SC5314 / ATCC MYA-2876) GN=MRP1 PE=4 SV=1	Q5AJC9_CANAL	35 kDa	0	0	1	0	0	0
1047	Putative uncharacterized protein SWI3 OS=Candida albicans (strain SC5314 / ATCC MYA-2876) GN=SWI3 PE=4 SV=1	Q59TE2_CANAL	124 kDa	0	0	1	0	0	0
1048	Fimbrin-like potential actin filament bundling protein OS=Candida albicans (strain SC5314 / ATCC MYA-2876) GN=CaO19.12992 PE=4 SV=1	Q5AC04_CANAL	14 kDa	0	0	1	0	0	0
1049	Putative uncharacterized protein KAP123 OS=Candida albicans (strain SC5314 / ATCC MYA-2876) GN=KAP123 PE=4 SV=1	Q5A9Z5_CANAL-DECOY	?	0	0	0	0	0	0
1050	Putative uncharacterized protein ECM29 OS=Candida albicans (strain SC5314 / ATCC MYA-2876) GN=ECM29 PE=4 SV=1	Q5ADR8_CANAL-DECOY	?	0	1	0	0	0	0
1051	Putative uncharacterized protein BAS1 OS=Candida albicans (strain SC5314 / ATCC MYA-2876) GN=BAS1 PE=4 SV=1	Q5A683_CANAL	85 kDa	0	1	0	0	0	0
1052	Putative uncharacterized protein SGS1 OS=Candida albicans (strain SC5314 / ATCC MYA-2876) GN=SGS1 PE=4 SV=1	Q5A5R4_CANAL	134 kDa	0	0	0	0	0	0
1053	Putative uncharacterized protein OS=Candida albicans (strain SC5314 / ATCC MYA-2876) GN=CaO19.8688 PE=4 SV=1	Q59QX2_CANAL (+1)	96 kDa	0	0	0	0	0	0
1054	Putative uncharacterized protein OS=Candida albicans (strain SC5314 / ATCC MYA-2876) GN=CaO19.9108 PE=4 SV=1	Q5ALP3_CANAL (+1)	53 kDa	1	0	0	2	0	0
1055	Putative uncharacterized protein UGA21 OS=Candida albicans (strain SC5314 / ATCC MYA-2876) GN=UGA21 PE=3 SV=1	Q5AEC3_CANAL	54 kDa	0	0	0	0	0	0
1056	DNA replication regulator SLD2 OS=Candida albicans (strain SC5314 / ATCC MYA-2876) GN=SLD2 PE=3 SV=1	SLD2_CANAL-DECOY	?	0	1	0	0	0	0
1057	Likely cytosolic ribosomal protein L9 OS=Candida albicans (strain SC5314 / ATCC MYA-2876) GN=RPL9B PE=4 SV=1	Q5AEN2_CANAL-DECOY	?	0	1	0	0	0	0
1058	Histone H2A.Z-specific chaperone CHZ1 OS=Candida albicans (strain SC5314 / ATCC MYA-2876) GN=CHZ1 PE=3 SV=1	CHZ1_CANAL	20 kDa	1	0	0	2	0	0
1059	Putative uncharacterized protein HMG1 OS=Candida albicans (strain SC5314 / ATCC MYA-2876) GN=HMG1 PE=3 SV=1	Q59VR2_CANAL	116 kDa	0	0	0	0	0	0
1060	Cluster of Putative uncharacterized protein (Fragment) OS=Candida albicans (strain SC5314 / ATCC MYA-2876) GN=CaO19.11371 PE=4 SV=1 (Q59V62_CANAL)	Q59V62_CANAL	59 kDa	0	0	0	0	0	0
1060.1	Putative uncharacterized protein (Fragment) OS=Candida albicans (strain SC5314 / ATCC MYA-2876) GN=CaO19.11371 PE=4 SV=1	Q59V62_CANAL	59 kDa	0	0	0	0	0	0
1061	Cluster of Aminomethyltransferase OS=Candida albicans (strain SC5314 / ATCC MYA-2876) GN=GCV1 PE=3 SV=1 (Q5ACF2_CANAL)	Q5ACF2_CANAL	44 kDa	0	0	2	0	0	0
1061.1	Aminomethyltransferase OS=Candida albicans (strain SC5314 / ATCC MYA-2876) GN=GCV1 PE=3 SV=1	Q5ACF2_CANAL	44 kDa	0	0	2	0	0	0
1062	Cluster of Likely mitochondrial ribosomal protein L22 OS=Candida albicans (strain SC5314 / ATCC MYA-2876) GN=MRPL22 PE=3 SV=1 (Q59PJ4_CANAL)	Q59PJ4_CANAL [2]	34 kDa	0	0	3	0	0	0
1062.1	Likely mitochondrial ribosomal protein L22 OS=Candida albicans (strain SC5314 / ATCC MYA-2876) GN=MRPL22 PE=3 SV=1	Q59PJ4_CANAL	34 kDa	0	0	2	0	0	0
1062.2	Likely mitochondrial ribosomal protein L22 OS=Candida albicans (strain SC5314 / ATCC MYA-2876) GN=MRPL22 PE=3 SV=1	Q59PH1_CANAL	34 kDa	0	0	2	0	0	0
1063	Putative uncharacterized protein ATP20 OS=Candida albicans (strain SC5314 / ATCC MYA-2876) GN=ATP20 PE=4 SV=1	Q59M30_CANAL	13 kDa	0	0	0	0	0	0
1064	Putative uncharacterized protein GUK1 OS=Candida albicans (strain SC5314 / ATCC MYA-2876) GN=GUK1 PE=3 SV=1	Q59N73_CANAL	28 kDa	0	0	3	0	0	0
1065	Potential mitochondrial glutaredoxin OS=Candida albicans (strain SC5314 / ATCC MYA-2876) GN=GRX5 PE=4 SV=1	Q59PW1_CANAL	19 kDa	0	0	4	0	0	0
1066	Putative uncharacterized protein OS=Candida albicans (strain SC5314 / ATCC MYA-2876) GN=CaO19.2150 PE=4 SV=1	Q59RG9_CANAL	34 kDa	0	0	5	0	0	0
1067	Putative uncharacterized protein OS=Candida albicans (strain SC5314 / ATCC MYA-2876) GN=CaO19.12007 PE=4 SV=1	Q59T99_CANAL (+1)	40 kDa	0	0	4	0	0	0
1068	Putative uncharacterized protein LYS9 OS=Candida albicans (strain SC5314 / ATCC MYA-2876) GN=LYS9 PE=4 SV=1	Q5A2W3_CANAL	49 kDa	0	0	3	0	0	0
1069	Putative uncharacterized protein SCL1 OS=Candida albicans (strain SC5314 / ATCC MYA-2876) GN=SCL1 PE=4 SV=1	Q5A7T8_CANAL	27 kDa	0	0	3	0	0	0
1070	Likely orotate phosphoribosyl transferase OS=Candida albicans (strain SC5314 / ATCC MYA-2876) GN=URA5 PE=3 SV=1	Q5A9B0_CANAL (+1)	24 kDa	0	0	4	0	0	0
1071	Putative uncharacterized protein OS=Candida albicans (strain SC5314 / ATCC MYA-2876) GN=CaO19.10285 PE=4 SV=1	Q5AF37_CANAL	14 kDa	0	0	3	0	0	0
1072	Potential peroxiredoxin OS=Candida albicans (strain SC5314 / ATCC MYA-2876) GN=TRP99 PE=4 SV=1	Q5A2B7_CANAL (+1)	20 kDa	0	0	3	0	0	0
1073	Ribosome biogenesis protein ERB1 OS=Candida albicans (strain SC5314 / ATCC MYA-2876) GN=ERB1 PE=3 SV=1	ERB1_CANAL	97 kDa	0	0	0	0	0	0
1074	Prohibitin-like protein OS=Candida albicans (strain SC5314 / ATCC MYA-2876) GN=PHB1 PE=4 SV=1	Q59SS4_CANAL (+1)	31 kDa	0	0	0	0	0	0
1075	Potential HSP40 family chaperone OS=Candida albicans (strain SC5314 / ATCC MYA-2876) GN=SIS1 PE=4 SV=1	Q59V92_CANAL	37 kDa	0	0	2	0	0	0
1076	Putative uncharacterized protein FUR1 OS=Candida albicans (strain SC5314 / ATCC MYA-2876) GN=FUR1 PE=4 SV=1	Q59QT3_CANAL	24 kDa	0	0	3	0	0	0
1077	Cytochrome c oxidase subunit 1 OS=Candida albicans (strain SC5314 / ATCC MYA-2876) GN=COX1 PE=3 SV=1	COX1_CANAL	59 kDa	0	0	2	0	0	0
1078	Putative uncharacterized protein PRE9 OS=Candida albicans (strain SC5314 / ATCC MYA-2876) GN=PRE9 PE=4 SV=1	Q5AEB8_CANAL	28 kDa	0	0	2	0	0	0
1079	37S ribosomal protein S25, mitochondrial OS=Candida albicans (strain SC5314 / ATCC MYA-2876) GN=RSM25 PE=3 SV=1	RT25_CANAL	34 kDa	0	0	2	0	0	0
1080	Putative uncharacterized protein RNA1 OS=Candida albicans (strain SC5314 / ATCC MYA-2876) GN=RNA1 PE=4 SV=1	Q5AJE2_CANAL (+1)	46 kDa	0	0	2	0	0	0
1081	Putative uncharacterized protein TIM23 OS=Candida albicans (strain SC5314 / ATCC MYA-2876) GN=TIM23 PE=4 SV=1	Q59YG5_CANAL	23 kDa	0	0	1	0	0	0
1082	Uncharacterized protein OS=Candida albicans (strain SC5314 / ATCC MYA-2876) GN=SEC17 PE=4 SV=1	Q5A9E7_CANAL	33 kDa	0	0	0	0	0	1
1083	Cyclin-dependent kinases regulatory subunit OS=Candida albicans (strain SC5314 / ATCC MYA-2876) GN=CKS1 PE=3 SV=1	Q59LQ4_CANAL	12 kDa	0	0	1	0	0	0
1084	Putative uncharacterized protein OS=Candida albicans (strain SC5314 / ATCC MYA-2876) GN=CaO19.3724 PE=4 SV=1	Q59V16_CANAL	31 kDa	0	1	0	1	1	0
1085	Likely mitochondrial ribosomal protein (E. coli L28) OS=Candida albicans (strain SC5314 / ATCC MYA-2876) GN=MRPL24 PE=4 SV=1	Q5AHG8_CANAL	31 kDa	0	0	1	0	0	0
1086	Acyl-coenzyme A oxidase OS=Candida albicans (strain SC5314 / ATCC MYA-2876) GN=POX1-3 PE=3 SV=1	Q5AJD9_CANAL	79 kDa	0	0	0	0	0	0
1087	Potential ARF GAP OS=Candida albicans (strain SC5314 / ATCC MYA-2876) GN=AGE2 PE=4 SV=1	Q59YD0_CANAL	43 kDa	0	0	1	0	0	1
1088	Putative uncharacterized protein OS=Candida albicans (strain SC5314 / ATCC MYA-2876) GN=CaO19.985 PE=4 SV=1	Q59NC5_CANAL-DECOY	?	0	0	0	0	0	0
1089	Likely 26S proteasome regulatory particle subunit Rpn3p OS=Candida albicans (strain SC5314 / ATCC MYA-2876) GN=RPN3 PE=4 SV=1	Q5AHZ8_CANAL	55 kDa	0	0	0	0	0	0
1090	Poly(A) polymerase PAPa OS=Candida albicans (strain SC5314 / ATCC MYA-2876) GN=PAPA PE=3 SV=1	PAPA_CANAL-DECOY	?	0	0	0	0	0	0
1091	Likely mitochondrial ribosome protein S18 (E. coli S11) OS=Candida albicans (strain SC5314 / ATCC MYA-2876) GN=MRPS18 PE=4 SV=1	Q59W75_CANAL	24 kDa	0	0	1	0	0	0
1092	Likely protein kinase OS=Candida albicans (strain SC5314 / ATCC MYA-2876) GN=RIM11 PE=4 SV=1	Q59K48_CANAL	47 kDa	0	3	0	0	0	0
1093	Endoplasmic reticulum vesicle protein 25 OS=Candida albicans (strain SC5314 / ATCC MYA-2876) GN=ERV25 PE=3 SV=1	TMEDA_CANAL	25 kDa	0	0	1	0	0	0
1094	Putative uncharacterized protein OS=Candida albicans (strain SC5314 / ATCC MYA-2876) GN=CaO19.14145 PE=4 SV=1	Q59RA7_CANAL (+1)	65 kDa	0	0	0	0	0	0
1095	Putative uncharacterized protein VPS33 OS=Candida albicans (strain SC5314 / ATCC MYA-2876) GN=VPS33 PE=4 SV=1	Q59MF4_CANAL-DECOY	?	0	0	0	0	0	0
1096	Potential general amino acid permease OS=Candida albicans (strain SC5314 / ATCC MYA-2876) GN=GAP4 PE=4 SV=1	Q59WB3_CANAL	66 kDa	0	0	0	0	0	0
1097	Putative uncharacterized protein OS=Candida albicans (strain SC5314 / ATCC MYA-2876) GN=CaO19.6612 PE=4 SV=1	Q59NK2_CANAL	30 kDa	0	0	1	0	0	0
1098	Potential fungal zinc cluster transcription factor OS=Candida albicans (strain SC5314 / ATCC MYA-2876) GN=CTA4 PE=4 SV=1	Q5A4G0_CANAL	117 kDa	0	0	0	0	0	0
1099	Putative uncharacterized protein OS=Candida albicans (strain SC5314 / ATCC MYA-2876) GN=CaO19.12069 PE=4 SV=1	Q5AMP6_CANAL	27 kDa	0	1	0	0	0	0
1100	Potential clathrin-associated protein AP-2 complex component OS=Candida albicans (strain SC5314 / ATCC MYA-2876) GN=APM4 PE=4 SV=1	Q5A2L1_CANAL	54 kDa	0	0	0	0	0	0
1101	Putative uncharacterized protein OS=Candida albicans (strain SC5314 / ATCC MYA-2876) GN=CaO19.8088 PE=4 SV=1	Q5A2D6_CANAL	150 kDa	0	0	0	0	0	0
1102	Putative uncharacterized protein SPT3 OS=Candida albicans (strain SC5314 / ATCC MYA-2876) GN=SPT3 PE=4 SV=1	G1UB09_CANAL	38 kDa	0	0	0	0	0	0
1103	Putative uncharacterized protein PSE1 OS=Candida albicans (strain SC5314 / ATCC MYA-2876) GN=PSE1 PE=4 SV=1	Q5A777_CANAL	121 kDa	0	0	0	0	0	1
1104	Putative uncharacterized protein TPS2 OS=Candida albicans (strain SC5314 / ATCC MYA-2876) GN=TPS2 PE=4 SV=1	Q5AI14_CANAL	100 kDa	0	0	0	0	0	0
1105	Putative uncharacterized protein LST4 OS=Candida albicans (strain SC5314 / ATCC MYA-2876) GN=LST4 PE=4 SV=1	Q5AHC6_CANAL-DECOY	?	0	0	0	0	0	0
1106	Putative uncharacterized protein OS=Candida albicans (strain SC5314 / ATCC MYA-2876) GN=CaO19.338 PE=4 SV=1	Q5AED0_CANAL	121 kDa	0	0	1	0	0	0
1107	Putative uncharacterized protein OS=Candida albicans (strain SC5314 / ATCC MYA-2876) GN=HOF1 PE=4 SV=1	Q59UQ6_CANAL-DECOY	?	0	0	0	0	0	0
1108	Dihydroorotate dehydrogenase (quinone), mitochondrial OS=Candida albicans (strain SC5314 / ATCC MYA-2876) GN=URA9 PE=1 SV=1	PYRD_CANAL	48 kDa	0	0	1	0	0	0
1109	Putative uncharacterized protein BUL3 OS=Candida albicans (strain SC5314 / ATCC MYA-2876) GN=BUL3 PE=4 SV=1	Q5ABB5_CANAL	91 kDa	0	0	0	0	0	0
1110	Potential mitochondrial glutaredoxin OS=Candida albicans (strain SC5314 / ATCC MYA-2876) GN=TTR1 PE=4 SV=1	Q5ABB1_CANAL	13 kDa	0	0	1	0	0	0
1111	Putative uncharacterized protein OS=Candida albicans (strain SC5314 / ATCC MYA-2876) GN=CaO19.12379 PE=4 SV=1	Q5AL64_CANAL	138 kDa	0	0	0	0	0	0
1112	Agglutinin-like ALS9 protein (Fragment) OS=Candida albicans (strain SC5314 / ATCC MYA-2876) GN=ALS9 PE=4 SV=1	Q59JP5_CANAL-DECOY	?	0	0	1	0	0	0
1113	SWR1-complex protein 4 OS=Candida albicans (strain SC5314 / ATCC MYA-2876) GN=SWC4 PE=3 SV=1	SWC4_CANAL	74 kDa	0	0	0	0	0	0
1114	Potential U3 snoRNP protein Utp8 OS=Candida albicans (strain SC5314 / ATCC MYA-2876) GN=UTP8 PE=4 SV=1	Q5A7N2_CANAL	81 kDa	0	0	0	0	0	0
1115	Putative uncharacterized protein RTT103 OS=Candida albicans (strain SC5314 / ATCC MYA-2876) GN=RTT103 PE=4 SV=1	Q5ACI0_CANAL-DECOY	?	0	0	0	0	0	0
1116	Putative uncharacterized protein OS=Candida albicans (strain SC5314 / ATCC MYA-2876) GN=CaO19.11647 PE=4 SV=1	Q59T06_CANAL-DECOY	?	0	2	0	0	0	0
1117	Acetate non-utilizing protein 9, mitochondrial OS=Candida albicans (strain SC5314 / ATCC MYA-2876) GN=ACN9 PE=3 SV=1	ACN9_CANAL	14 kDa	0	1	1	0	0	1
1118	Putative uncharacterized protein SCD99 OS=Candida albicans (strain SC5314 / ATCC MYA-2876) GN=SCD99 PE=4 SV=1	Q5AF74_CANAL	38 kDa	0	0	0	0	0	0
1119	Oxidative stress response regulator protein OS=Candida albicans (strain SC5314 / ATCC MYA-2876) GN=SSK1 PE=4 SV=1	Q5AKU6_CANAL-DECOY	?	0	0	0	0	0	0
1120	Putative uncharacterized protein MNR2 OS=Candida albicans (strain SC5314 / ATCC MYA-2876) GN=MNR2 PE=4 SV=1	Q59UQ3_CANAL	91 kDa	0	0	0	1	0	0
1121	Putative uncharacterized protein OS=Candida albicans (strain SC5314 / ATCC MYA-2876) GN=CaO19.4749 PE=4 SV=1	Q5AQ59_CANAL	63 kDa	0	1	0	0	0	0
1122	Cluster of Arginase family protein OS=Candida albicans (strain SC5314 / ATCC MYA-2876) GN=CAR1 PE=3 SV=1 (Q5AK86_CANAL)	Q5AK86_CANAL	34 kDa	0	0	3	0	0	0
1122.1	Arginase family protein OS=Candida albicans (strain SC5314 / ATCC MYA-2876) GN=CAR1 PE=3 SV=1	Q5AK86_CANAL	34 kDa	0	0	3	0	0	0
1123	Chorismate synthase OS=Candida albicans (strain SC5314 / ATCC MYA-2876) GN=ARO2 PE=3 SV=1	Q59K34_CANAL (+1)	41 kDa	0	0	3	0	0	0
1124	Putative uncharacterized protein OS=Candida albicans (strain SC5314 / ATCC MYA-2876) GN=CaO19.543 PE=3 SV=1	Q5A6L1_CANAL	50 kDa	0	0	3	0	0	0
1125	Putative uncharacterized protein OS=Candida albicans (strain SC5314 / ATCC MYA-2876) GN=CaO19.13195 PE=4 SV=1	Q5A8H6_CANAL	80 kDa	0	0	4	0	0	0
1126	Putative uncharacterized protein OS=Candida albicans (strain SC5314 / ATCC MYA-2876) GN=CaO19.5525 PE=4 SV=1	Q5AC25_CANAL	38 kDa	0	0	3	0	0	0
1127	Peroxisomal catalase OS=Candida albicans (strain SC5314 / ATCC MYA-2876) GN=CTA1 PE=2 SV=4	CATA_CANAL	55 kDa	0	0	2	0	0	0
1128	Likely long chain fatty acid-CoA synthetase Faa4p OS=Candida albicans (strain SC5314 / ATCC MYA-2876) GN=FAA4 PE=4 SV=1	Q5ACQ0_CANAL	77 kDa	0	0	3	0	0	0
1129	Putative uncharacterized protein KAP95 OS=Candida albicans (strain SC5314 / ATCC MYA-2876) GN=KAP95 PE=4 SV=1	Q59VX7_CANAL	97 kDa	0	0	3	0	0	0
1130	Putative uncharacterized protein CDC12 OS=Candida albicans (strain SC5314 / ATCC MYA-2876) GN=CDC12 PE=3 SV=1	Q5AI39_CANAL	43 kDa	0	0	3	0	0	0
1131	Potential L7-like nucleolar rRNA maturation factor OS=Candida albicans (strain SC5314 / ATCC MYA-2876) GN=RPL7 PE=4 SV=1	Q59V85_CANAL	34 kDa	0	1	0	0	0	0
1132	Ras-related protein SEC4 OS=Candida albicans (strain SC5314 / ATCC MYA-2876) GN=SEC4 PE=3 SV=1	SEC4_CANAL	23 kDa	0	0	3	0	0	0
1133	Likely 26S proteasome regulatory particle ATPase Rpt4p OS=Candida albicans (strain SC5314 / ATCC MYA-2876) GN=RPT4 PE=4 SV=1	Q5A6S2_CANAL	48 kDa	0	0	2	0	0	0
1134	Putative uncharacterized protein OS=Candida albicans (strain SC5314 / ATCC MYA-2876) GN=CaO19.1946 PE=4 SV=1	Q5A1Q0_CANAL	34 kDa	0	0	2	0	0	0
1135	Cysteine desulfurase, mitochondrial OS=Candida albicans (strain SC5314 / ATCC MYA-2876) GN=NFS1 PE=3 SV=1	NFS1_CANAL	53 kDa	0	0	1	0	0	0
1136	cAMP-dependent protein kinase regulatory subunit OS=Candida albicans (strain SC5314 / ATCC MYA-2876) GN=BCY1 PE=3 SV=1	KAPR_CANAL	50 kDa	0	0	2	0	0	0
1137	Putative uncharacterized protein DHN6 OS=Candida albicans (strain SC5314 / ATCC MYA-2876) GN=ASR1 PE=4 SV=1	Q59WF7_CANAL (+1)	37 kDa	0	0	0	0	0	0
1138	Putative uncharacterized protein OS=Candida albicans (strain SC5314 / ATCC MYA-2876) GN=CaO19.12919 PE=4 SV=1	Q5A7K2_CANAL-DECOY	?	0	0	0	0	1	0
1139	13 kDa ribonucleoprotein-associated protein OS=Candida albicans (strain SC5314 / ATCC MYA-2876) GN=SNU13 PE=3 SV=1	SNU13_CANAL	14 kDa	0	0	1	0	0	0
1140	Putative uncharacterized protein RFA2 OS=Candida albicans (strain SC5314 / ATCC MYA-2876) GN=RFA2 PE=4 SV=1	Q59Z33_CANAL	29 kDa	0	0	1	0	0	0
1141	Putative uncharacterized protein PUT2 OS=Candida albicans (strain SC5314 / ATCC MYA-2876) GN=PUT2 PE=3 SV=1	Q5AK46_CANAL	66 kDa	0	0	1	0	0	0
1142	Putative uncharacterized protein RAD23 OS=Candida albicans (strain SC5314 / ATCC MYA-2876) GN=RAD23 PE=4 SV=1	Q5ALT0_CANAL	36 kDa	0	0	2	0	0	0
1143	Mitochondrial import inner membrane translocase subunit TIM50 OS=Candida albicans (strain SC5314 / ATCC MYA-2876) GN=TIM50 PE=3 SV=1	TIM50_CANAL	54 kDa	0	1	2	0	0	0
1144	Potential mRNA decapping and decay factor OS=Candida albicans (strain SC5314 / ATCC MYA-2876) GN=PAT1 PE=4 SV=1	Q5A698_CANAL	88 kDa	0	0	1	0	0	0
1145	Transcription factor IWS1 OS=Candida albicans (strain SC5314 / ATCC MYA-2876) GN=IWS1 PE=3 SV=1	IWS1_CANAL	46 kDa	0	1	0	0	0	0
1146	Putative uncharacterized protein SAS10 OS=Candida albicans (strain SC5314 / ATCC MYA-2876) GN=SAS10 PE=4 SV=1	Q5AF91_CANAL (+1)	65 kDa	0	0	1	0	0	0
1147	Hypothetical LPF family protein 34 OS=Candida albicans (strain SC5314 / ATCC MYA-2876) GN=LPF34 PE=4 SV=1	Q5A5E2_CANAL-DECOY	?	0	0	0	0	0	0
1148	Putative uncharacterized protein OS=Candida albicans (strain SC5314 / ATCC MYA-2876) GN=CaO19.13154 PE=4 SV=1	Q5A8L7_CANAL	34 kDa	0	0	1	0	0	0
1149	Putative uncharacterized protein VMA5 OS=Candida albicans (strain SC5314 / ATCC MYA-2876) GN=VMA5 PE=4 SV=1	Q5A2U9_CANAL	45 kDa	0	0	1	0	0	0
1150	Likely vacuolar metal resistance ABC transporter OS=Candida albicans (strain SC5314 / ATCC MYA-2876) GN=YCF1 PE=4 SV=1	Q5AH59_CANAL	178 kDa	0	0	0	0	0	0
1151	Putative uncharacterized protein OS=Candida albicans (strain SC5314 / ATCC MYA-2876) GN=CaO19.5491 PE=4 SV=1	Q59P45_CANAL-DECOY (+1)	?	0	0	0	0	0	0
1152	Likely U3 snoRNP ribosomal biogenesis factor IMP4p OS=Candida albicans (strain SC5314 / ATCC MYA-2876) GN=IMP4 PE=4 SV=1	Q59X74_CANAL	33 kDa	0	1	0	0	0	0
1153	Likely anthranilate synthase component I OS=Candida albicans (strain SC5314 / ATCC MYA-2876) GN=TRP2 PE=4 SV=1	Q5A9L8_CANAL	59 kDa	0	0	1	0	0	0
1154	Likely protein kinase OS=Candida albicans (strain SC5314 / ATCC MYA-2876) GN=HRR25 PE=4 SV=1	Q59S64_CANAL	50 kDa	0	0	1	0	0	0
1155	rRNA biogenesis protein RRP36 OS=Candida albicans (strain SC5314 / ATCC MYA-2876) GN=RRP36 PE=3 SV=1	RRP36_CANAL	33 kDa	0	0	0	0	0	0
1156	Potential L24-like nucleolar rRNA maturation factor OS=Candida albicans (strain SC5314 / ATCC MYA-2876) GN=RLP24 PE=4 SV=1	Q59SI1_CANAL	25 kDa	0	1	1	0	0	0
1157	Putative uncharacterized protein OS=Candida albicans (strain SC5314 / ATCC MYA-2876) GN=CaO19.4246 PE=4 SV=1	Q5AGD3_CANAL	66 kDa	0	0	2	0	0	0
1158	Putative uncharacterized protein NUP188 OS=Candida albicans (strain SC5314 / ATCC MYA-2876) GN=NUP188 PE=4 SV=1	Q5APF7_CANAL	186 kDa	0	0	0	0	0	1
1159	Mitochondrial import inner membrane translocase subunit TIM13 OS=Candida albicans (strain SC5314 / ATCC MYA-2876) GN=TIM13 PE=3 SV=1	TIM13_CANAL	12 kDa	0	0	1	1	0	0
1160	Putative uncharacterized protein OS=Candida albicans (strain SC5314 / ATCC MYA-2876) GN=CaO19.13274 PE=4 SV=1	Q59M47_CANAL-DECOY	?	0	0	0	0	0	1
1161	Putative uncharacterized protein MTR4 OS=Candida albicans (strain SC5314 / ATCC MYA-2876) GN=MTR4 PE=4 SV=1	Q59PN6_CANAL-DECOY	?	0	0	0	0	0	0
1162	Hypothetical HRQ family protein 4 OS=Candida albicans (strain SC5314 / ATCC MYA-2876) GN=HRQ4 PE=4 SV=1	Q5ABX7_CANAL-DECOY	?	0	0	0	0	0	0
1163	Putative uncharacterized protein RGA2 OS=Candida albicans (strain SC5314 / ATCC MYA-2876) GN=RGA2 PE=4 SV=1	Q5AMQ3_CANAL-DECOY	?	0	0	0	0	0	0
1164	Putative uncharacterized protein YVC1 OS=Candida albicans (strain SC5314 / ATCC MYA-2876) GN=YVC1 PE=4 SV=1	Q5A2J7_CANAL	77 kDa	0	1	0	0	0	0
1165	Autophagy-related protein 20 OS=Candida albicans (strain SC5314 / ATCC MYA-2876) GN=ATG20 PE=3 SV=1	ATG20_CANAL-DECOY	?	0	0	0	0	0	0
1166	Putative uncharacterized protein OS=Candida albicans (strain SC5314 / ATCC MYA-2876) GN=CaO19.11488 PE=3 SV=1	Q5AK15_CANAL	27 kDa	0	2	0	0	0	0
1167	Putative uncharacterized protein DIP2 OS=Candida albicans (strain SC5314 / ATCC MYA-2876) GN=DIP2 PE=4 SV=1	Q5A756_CANAL-DECOY	?	0	0	0	0	0	0
1168	Hypothetical LPF family protein 32 OS=Candida albicans (strain SC5314 / ATCC MYA-2876) GN=IFA21 PE=4 SV=1	Q5A5E4_CANAL	87 kDa	0	0	0	0	0	0
1169	Putative uncharacterized protein OS=Candida albicans (strain SC5314 / ATCC MYA-2876) GN=CaO19.2310 PE=4 SV=1	Q59WJ1_CANAL	32 kDa	0	0	0	0	0	0
1170	Likely protein kinase OS=Candida albicans (strain SC5314 / ATCC MYA-2876) GN=RCK2 PE=4 SV=1	Q59Z94_CANAL	68 kDa	0	0	1	0	0	0
1171	Putative uncharacterized protein OS=Candida albicans (strain SC5314 / ATCC MYA-2876) GN=CaO19.12812 PE=4 SV=1	Q5A5P7_CANAL	40 kDa	0	1	0	0	1	1
1172	Likely protein kinase OS=Candida albicans (strain SC5314 / ATCC MYA-2876) GN=CaO19.13654 PE=4 SV=1	Q5AAN6_CANAL	64 kDa	0	0	0	0	0	0
1173	Potential glycosyl hydrolase OS=Candida albicans (strain SC5314 / ATCC MYA-2876) GN=CaO19.12138 PE=3 SV=1	Q5AMH8_CANAL	81 kDa	0	1	0	0	0	0
1174	Putative uncharacterized protein ACT2 OS=Candida albicans (strain SC5314 / ATCC MYA-2876) GN=ACT2 PE=4 SV=1	Q5A5V8_CANAL-DECOY	?	0	0	0	0	0	0
1175	Mediator of RNA polymerase II transcription subunit 4 OS=Candida albicans (strain SC5314 / ATCC MYA-2876) GN=MED4 PE=3 SV=1	MED4_CANAL-DECOY	?	0	0	0	0	0	0
1176	U1 small nuclear ribonucleoprotein component SNU71 OS=Candida albicans (strain SC5314 / ATCC MYA-2876) GN=SNU71 PE=3 SV=1	SNU71_CANAL	71 kDa	0	1	0	0	0	0
1177	Putative uncharacterized protein OS=Candida albicans (strain SC5314 / ATCC MYA-2876) GN=CaO19.1189 PE=4 SV=1	Q59RL5_CANAL (+1)	78 kDa	0	0	0	0	0	1
1178	Potential actinin-type actin binding protein OS=Candida albicans (strain SC5314 / ATCC MYA-2876) GN=ABP2 PE=4 SV=1	Q59ZJ0_CANAL	70 kDa	0	0	0	0	0	0
1179	Putative uncharacterized protein HRD3 OS=Candida albicans (strain SC5314 / ATCC MYA-2876) GN=HRD3 PE=4 SV=1	Q59RL3_CANAL	92 kDa	0	1	0	0	0	0
1180	Putative uncharacterized protein RFC4 OS=Candida albicans (strain SC5314 / ATCC MYA-2876) GN=RFC4 PE=4 SV=1	Q5ACI4_CANAL	36 kDa	0	0	0	0	0	0
1181	Putative uncharacterized protein OS=Candida albicans (strain SC5314 / ATCC MYA-2876) GN=CaO19.9428 PE=4 SV=1	Q59UC5_CANAL	24 kDa	0	1	0	0	0	0
1182	Putative uncharacterized protein ALG7 OS=Candida albicans (strain SC5314 / ATCC MYA-2876) GN=ALG7 PE=4 SV=1	Q5A2S8_CANAL	55 kDa	0	0	0	0	0	0
1183	Alpha,alpha-trehalose-phosphate synthase [UDP-forming] OS=Candida albicans (strain SC5314 / ATCC MYA-2876) GN=TPS1 PE=2 SV=1	TPS1_CANAL	54 kDa	0	0	1	0	0	0
1184	Likely mitochondrial tyrosyl-tRNA synthetase OS=Candida albicans (strain SC5314 / ATCC MYA-2876) GN=MSY1 PE=4 SV=1	Q59WU2_CANAL	56 kDa	0	0	0	0	0	0
1185	Putative uncharacterized protein GSL1 OS=Candida albicans (strain SC5314 / ATCC MYA-2876) GN=GSL1 PE=4 SV=1	Q5A9Y9_CANAL	182 kDa	0	0	0	0	0	0
1186	Potential zinc finger protein OS=Candida albicans (strain SC5314 / ATCC MYA-2876) GN=RTS2 PE=4 SV=1	Q5A673_CANAL	28 kDa	0	1	0	0	0	0
1187	Cluster of Putative uncharacterized protein UBP10 OS=Candida albicans (strain SC5314 / ATCC MYA-2876) GN=DOT4 PE=4 SV=1 (Q59PG8_CANAL)	Q59PG8_CANAL	84 kDa	0	1	0	0	0	0
1187.1	Putative uncharacterized protein UBP10 OS=Candida albicans (strain SC5314 / ATCC MYA-2876) GN=DOT4 PE=4 SV=1	Q59PG8_CANAL	84 kDa	0	1	0	0	0	0
1188	Putative uncharacterized protein OS=Candida albicans (strain SC5314 / ATCC MYA-2876) GN=CaO19.5689 PE=4 SV=1	Q59LB0_CANAL	36 kDa	0	0	2	0	0	0
1189	Putative uncharacterized protein PUP3 OS=Candida albicans (strain SC5314 / ATCC MYA-2876) GN=PUP3 PE=3 SV=1	Q59PQ2_CANAL	23 kDa	0	0	3	0	0	0
1190	Potential mitochondrial Complex I, B14_14kd subunit OS=Candida albicans (strain SC5314 / ATCC MYA-2876) GN=CaO19.13456 PE=4 SV=1	Q5ABD5_CANAL	15 kDa	0	0	2	0	0	0
1191	Putative uncharacterized protein TPD3 OS=Candida albicans (strain SC5314 / ATCC MYA-2876) GN=TPD3 PE=4 SV=1	Q5ADN1_CANAL	73 kDa	0	0	3	0	0	0
1192	Potential mitochondrial Complex I, NUIM_23kd subunit OS=Candida albicans (strain SC5314 / ATCC MYA-2876) GN=CaO19.12222 PE=3 SV=1	Q5APK6_CANAL	28 kDa	0	0	2	0	0	0
1193	Proliferating cell nuclear antigen OS=Candida albicans (strain SC5314 / ATCC MYA-2876) GN=POL30 PE=3 SV=1	Q5AMN0_CANAL	29 kDa	0	0	2	0	0	0
1194	Putative uncharacterized protein PRE5 OS=Candida albicans (strain SC5314 / ATCC MYA-2876) GN=PRE5 PE=4 SV=1	Q5A0B7_CANAL	31 kDa	0	0	2	0	0	0
1195	Putative uncharacterized protein OS=Candida albicans (strain SC5314 / ATCC MYA-2876) GN=CaO19.10934 PE=4 SV=1	Q5A4L1_CANAL	40 kDa	0	0	2	0	0	0
1196	Potential leucyl-tRNA synthetase OS=Candida albicans (strain SC5314 / ATCC MYA-2876) GN=CDC60 PE=4 SV=1	Q5A9A5_CANAL	12 kDa	0	0	2	0	0	0
1197	Dolichyl-phosphate-mannose--protein mannosyltransferase 1 OS=Candida albicans (strain SC5314 / ATCC MYA-2876) GN=PMT1 PE=3 SV=1	PMT1_CANAL	100 kDa	0	0	2	0	0	0
1198	Putative uncharacterized protein SEC72 OS=Candida albicans (strain SC5314 / ATCC MYA-2876) GN=SEC72 PE=4 SV=1	Q59SJ2_CANAL	23 kDa	0	0	2	0	0	0
1199	Putative uncharacterized protein HMT1 OS=Candida albicans (strain SC5314 / ATCC MYA-2876) GN=HMT1 PE=4 SV=1	Q5A943_CANAL	39 kDa	0	0	2	0	0	0
1200	Likely mitochondrial ribosomal protein (E. coli S14) OS=Candida albicans (strain SC5314 / ATCC MYA-2876) GN=MRP2 PE=4 SV=1	Q5AJZ7_CANAL	13 kDa	0	0	1	0	0	0
1201	Likely mitochondrial ribosomal protein MRPL17p OS=Candida albicans (strain SC5314 / ATCC MYA-2876) GN=MRPL17 PE=4 SV=1	Q59X93_CANAL	33 kDa	0	0	1	0	0	0
1202	Putative uncharacterized protein OS=Candida albicans (strain SC5314 / ATCC MYA-2876) GN=CaO19.1179 PE=4 SV=1	Q59RM5_CANAL	14 kDa	0	0	1	0	0	0
1203	Putative uncharacterized protein OS=Candida albicans (strain SC5314 / ATCC MYA-2876) GN=CaO19.1697 PE=4 SV=1	Q5AJ98_CANAL	40 kDa	0	0	1	1	0	0
1204	Uncharacterized protein OS=Candida albicans (strain SC5314 / ATCC MYA-2876) GN=CaO19.7297 PE=3 SV=1	Q5A410_CANAL	42 kDa	0	0	2	0	0	0
1205	Putative uncharacterized protein GDH2 OS=Candida albicans (strain SC5314 / ATCC MYA-2876) GN=GDH2 PE=4 SV=1	Q5A2L3_CANAL (+1)	120 kDa	0	0	2	0	0	0
1206	Putative uncharacterized protein PAF1 OS=Candida albicans (strain SC5314 / ATCC MYA-2876) GN=PAF1 PE=4 SV=1	Q59Y36_CANAL	55 kDa	0	1	0	0	0	0
1207	ATP-dependent RNA helicase MRH4, mitochondrial OS=Candida albicans (strain SC5314 / ATCC MYA-2876) GN=MRH4 PE=3 SV=1	MRH4_CANAL	63 kDa	0	2	0	0	0	0
1208	Putative uncharacterized protein PRE10 OS=Candida albicans (strain SC5314 / ATCC MYA-2876) GN=PRE10 PE=4 SV=1	Q5AGV6_CANAL	27 kDa	0	0	1	0	0	0
1209	Putative uncharacterized protein OS=Candida albicans (strain SC5314 / ATCC MYA-2876) GN=CaO19.13616 PE=4 SV=1	Q5AAS4_CANAL	24 kDa	0	1	0	1	0	0
1210	Likely mitochondrial ribosomal small subunit protein MRPS35p OS=Candida albicans (strain SC5314 / ATCC MYA-2876) GN=CaO19.11043 PE=4 SV=1	Q59ZG0_CANAL	16 kDa	0	0	1	0	0	0
1211	Putative uncharacterized protein SDH1 OS=Candida albicans (strain SC5314 / ATCC MYA-2876) GN=SDH12 PE=4 SV=1	Q5A1E8_CANAL-DECOY	?	0	0	0	0	0	0
1212	Putative uncharacterized protein OS=Candida albicans (strain SC5314 / ATCC MYA-2876) GN=CaO19.1564 PE=4 SV=1	Q5ALL4_CANAL	21 kDa	0	0	1	0	0	0
1213	Potential SH3 domain protein/prion OS=Candida albicans (strain SC5314 / ATCC MYA-2876) GN=PIN3 PE=4 SV=1	Q5ANE7_CANAL	31 kDa	0	0	1	0	0	0
1214	Mitochondrial import inner membrane translocase subunit TIM8 OS=Candida albicans (strain SC5314 / ATCC MYA-2876) GN=TIM8 PE=3 SV=2	TIM8_CANAL	10 kDa	0	0	1	0	0	0
1215	ATP-dependent RNA helicase DBP9 OS=Candida albicans (strain SC5314 / ATCC MYA-2876) GN=DBP9 PE=3 SV=1	DBP9_CANAL	65 kDa	0	0	1	0	0	0
1216	Putative uncharacterized protein OS=Candida albicans (strain SC5314 / ATCC MYA-2876) GN=CaO19.12950 PE=4 SV=1	Q59P41_CANAL-DECOY	?	0	0	0	0	0	0
1217	Likely protein kinase OS=Candida albicans (strain SC5314 / ATCC MYA-2876) GN=NPR1 PE=4 SV=1	Q5AAS8_CANAL (+1)	91 kDa	0	0	1	0	0	0
1218	Aspartate aminotransferase OS=Candida albicans (strain SC5314 / ATCC MYA-2876) GN=AAT21 PE=3 SV=1	Q59N40_CANAL	46 kDa	0	0	1	0	0	0
1219	Putative uncharacterized protein RSC2 OS=Candida albicans (strain SC5314 / ATCC MYA-2876) GN=RSC2 PE=4 SV=1	Q5AI89_CANAL	90 kDa	0	0	0	0	0	0
1220	Aspartate aminotransferase OS=Candida albicans (strain SC5314 / ATCC MYA-2876) GN=AAT22 PE=3 SV=1	Q5AMH7_CANAL	40 kDa	0	0	1	0	0	0
1221	Likely 26S proteasome regulatory particle ATPase Rpt4p OS=Candida albicans (strain SC5314 / ATCC MYA-2876) GN=RPT4 PE=4 SV=1	Q5A6S2_CANAL-DECOY	?	0	0	0	0	0	0
1222	Diphthamide biosynthesis protein 1 OS=Candida albicans (strain SC5314 / ATCC MYA-2876) GN=DPH1 PE=3 SV=2	DPH1_CANAL-DECOY	?	0	0	0	0	0	0
1223	Putative uncharacterized protein CNS1 OS=Candida albicans (strain SC5314 / ATCC MYA-2876) GN=CNS1 PE=4 SV=1	Q5ABB8_CANAL	45 kDa	0	0	0	0	0	0
1224	Putative uncharacterized protein RPA49 OS=Candida albicans (strain SC5314 / ATCC MYA-2876) GN=RPA49 PE=4 SV=1	Q5AD50_CANAL	44 kDa	0	0	0	0	0	0
1225	Subtilisin-like proprotein convertase OS=Candida albicans (strain SC5314 / ATCC MYA-2876) GN=KEX2 PE=4 SV=1	Q5APK9_CANAL	105 kDa	0	1	0	0	0	0
1226	Putative uncharacterized protein OS=Candida albicans (strain SC5314 / ATCC MYA-2876) GN=CaO19.1877 PE=4 SV=1	Q59U74_CANAL-DECOY	?	0	0	0	0	0	0
1227	Putative uncharacterized protein APR1 OS=Candida albicans (strain SC5314 / ATCC MYA-2876) GN=1-Apr PE=3 SV=1	Q59U59_CANAL	45 kDa	0	0	0	0	0	0
1228	Conserved fungal protein CFP1 OS=Candida albicans (strain SC5314 / ATCC MYA-2876) GN=FLC2 PE=4 SV=1	Q59L15_CANAL	90 kDa	0	1	0	0	0	0
1229	Putative uncharacterized protein OS=Candida albicans (strain SC5314 / ATCC MYA-2876) GN=CaO19.5694 PE=4 SV=1	Q59LA6_CANAL	32 kDa	0	0	0	0	0	1
1230	Uncharacterized protein OS=Candida albicans (strain SC5314 / ATCC MYA-2876) GN=SLP99 PE=4 SV=1	Q5A411_CANAL	39 kDa	0	0	0	0	0	0
1231	Potential spliceosome factor OS=Candida albicans (strain SC5314 / ATCC MYA-2876) GN=CUS2 PE=4 SV=1	Q5A8I2_CANAL-DECOY	?	0	0	0	0	0	0
1232	Potential Sin3.Rpd3 histone deacetylase complex component Rpd3p OS=Candida albicans (strain SC5314 / ATCC MYA-2876) GN=RPD31 PE=4 SV=1	Q5ADP0_CANAL	65 kDa	0	0	0	0	0	0
1233	Putative uncharacterized protein OS=Candida albicans (strain SC5314 / ATCC MYA-2876) GN=CaO19.8864 PE=4 SV=1	Q5A430_CANAL (+1)	42 kDa	0	0	0	0	0	1
1234	Putative uncharacterized protein ENP1 OS=Candida albicans (strain SC5314 / ATCC MYA-2876) GN=ENP1 PE=4 SV=1	Q59LC3_CANAL	54 kDa	0	1	0	0	0	0
1235	Uncharacterized protein OS=Candida albicans (strain SC5314 / ATCC MYA-2876) GN=CaO19.7310 PE=4 SV=1	Q5A400_CANAL-DECOY	?	0	0	0	0	1	0
1236	Putative uncharacterized protein OS=Candida albicans (strain SC5314 / ATCC MYA-2876) GN=CaO19.10513 PE=4 SV=1	Q5AI57_CANAL	119 kDa	0	0	0	0	0	0
1237	Likely protein kinase OS=Candida albicans (strain SC5314 / ATCC MYA-2876) GN=CDC5 PE=4 SV=1	Q5ABG0_CANAL-DECOY	?	0	0	0	0	0	0
1238	Potential zinc ring finger protein OS=Candida albicans (strain SC5314 / ATCC MYA-2876) GN=CaO19.10953 PE=4 SV=1	Q5A4J2_CANAL (+1)	80 kDa	0	0	0	0	0	0
1239	Potential high-affinity sulfate transporter OS=Candida albicans (strain SC5314 / ATCC MYA-2876) GN=SUL2 PE=4 SV=1	Q5AF70_CANAL-DECOY (+1)	?	0	1	0	0	0	0
1240	Potential mRNA deadenylase and CCR4-NOT complex subunit Mot2p OS=Candida albicans (strain SC5314 / ATCC MYA-2876) GN=NOT4 PE=4 SV=1	Q59UI5_CANAL (+1)	63 kDa	0	0	1	0	0	0
1241	Putative uncharacterized protein ERG26 OS=Candida albicans (strain SC5314 / ATCC MYA-2876) GN=ERG26 PE=3 SV=1	Q5A1B0_CANAL-DECOY	?	0	1	0	0	0	0
1242	3-isopropylmalate dehydratase OS=Candida albicans (strain SC5314 / ATCC MYA-2876) GN=LEU1 PE=3 SV=1	Q5AAJ1_CANAL	86 kDa	0	0	1	0	0	0
1243	Putative uncharacterized protein OS=Candida albicans (strain SC5314 / ATCC MYA-2876) GN=CaO19.1789 PE=4 SV=1	Q59P15_CANAL-DECOY	?	0	0	0	0	0	0
1244	Putative uncharacterized protein CAT2 OS=Candida albicans (strain SC5314 / ATCC MYA-2876) GN=CTN2 PE=3 SV=1	Q5AMQ5_CANAL	71 kDa	0	0	0	0	0	1
1245	Putative uncharacterized protein VPS9 OS=Candida albicans (strain SC5314 / ATCC MYA-2876) GN=VPS9 PE=4 SV=1	Q5AC17_CANAL-DECOY	?	0	0	0	0	0	0
1246	Putative uncharacterized protein OS=Candida albicans (strain SC5314 / ATCC MYA-2876) GN=CaO19.12397 PE=3 SV=1	Q5AL46_CANAL	90 kDa	0	0	1	0	0	0
1247	Potential GTPase Activating Protein OS=Candida albicans (strain SC5314 / ATCC MYA-2876) GN=CaO19.1798 PE=4 SV=1	Q59P06_CANAL-DECOY (+1)	?	0	0	0	0	0	1
1248	Histone acetyltransferase ESA1 OS=Candida albicans (strain SC5314 / ATCC MYA-2876) GN=ESA1 PE=3 SV=1	ESA1_CANAL	62 kDa	0	0	0	0	0	0
1249	Calpain-like protease palB/RIM13 OS=Candida albicans (strain SC5314 / ATCC MYA-2876) GN=RIM13 PE=3 SV=1	PALB_CANAL	83 kDa	0	0	0	0	0	0
1250	Potential SET3 histone deacetylase complex component Snt1p OS=Candida albicans (strain SC5314 / ATCC MYA-2876) GN=SNT1 PE=4 SV=1	Q5A3N0_CANAL (+1)	112 kDa	0	0	0	0	0	0
1251	Putative uncharacterized protein UBR2 OS=Candida albicans (strain SC5314 / ATCC MYA-2876) GN=UBR2 PE=4 SV=1	Q5AFB1_CANAL	219 kDa	0	0	0	0	0	0
1252	Likely U3 snoRNP component OS=Candida albicans (strain SC5314 / ATCC MYA-2876) GN=CaO19.9142 PE=4 SV=1	Q5ALK9_CANAL (+1)	134 kDa	0	0	0	0	0	0
1253	Putative alpha-1,3-mannosyltransferase MNN1 OS=Candida albicans (strain SC5314 / ATCC MYA-2876) GN=MNN1 PE=2 SV=1	MNN1_CANAL-DECOY	?	0	0	0	0	0	0
1254	Protein BTN1 OS=Candida albicans (strain SC5314 / ATCC MYA-2876) GN=BTN1 PE=3 SV=1	BTN1_CANAL-DECOY	?	0	0	0	0	0	0
1255	Putative uncharacterized protein OS=Candida albicans (strain SC5314 / ATCC MYA-2876) GN=CaO19.11263 PE=4 SV=1	Q5A6A8_CANAL-DECOY	?	0	1	0	0	0	0
1256	DNA-directed RNA polymerase OS=Candida albicans (strain SC5314 / ATCC MYA-2876) GN=RPO21 PE=3 SV=1	Q5ACI7_CANAL	192 kDa	0	0	1	0	0	0
1257	Nicotinate-nucleotide pyrophosphorylase [carboxylating] OS=Candida albicans (strain SC5314 / ATCC MYA-2876) GN=CaO19.12521 PE=3 SV=1	Q5A7A7_CANAL-DECOY (+1)	?	0	0	0	0	0	0
1258	Putative uncharacterized protein OS=Candida albicans (strain SC5314 / ATCC MYA-2876) GN=CaO19.4245 PE=4 SV=1	Q5AGD4_CANAL-DECOY	?	0	0	0	0	0	0
1259	Lipoyl synthase, mitochondrial OS=Candida albicans (strain SC5314 / ATCC MYA-2876) GN=LAB5 PE=3 SV=1	LIPA_CANAL	43 kDa	0	0	0	0	0	0
1260	Putative uncharacterized protein SMY2 OS=Candida albicans (strain SC5314 / ATCC MYA-2876) GN=SMY2 PE=4 SV=1	Q5A0V5_CANAL (+1)	98 kDa	0	0	0	0	0	0
1261	Likely 26S proteasome regulatory particle ATPase Rpt5p OS=Candida albicans (strain SC5314 / ATCC MYA-2876) GN=RPT5 PE=4 SV=1	Q5A0X3_CANAL-DECOY	?	0	0	0	0	0	0
1262	Putative uncharacterized protein OS=Candida albicans (strain SC5314 / ATCC MYA-2876) GN=CaO19.8192 PE=4 SV=1	Q59KR0_CANAL-DECOY	?	0	0	0	0	0	2
1263	Cluster of NADPH:adrenodoxin oxidoreductase, mitochondrial OS=Candida albicans (strain SC5314 / ATCC MYA-2876) GN=ARH1 PE=3 SV=1 (Q59QA8_CANAL)	Q59QA8_CANAL	55 kDa	0	0	0	0	0	0
1263.1	NADPH:adrenodoxin oxidoreductase, mitochondrial OS=Candida albicans (strain SC5314 / ATCC MYA-2876) GN=ARH1 PE=3 SV=1	Q59QA8_CANAL	55 kDa	0	0	0	0	0	0
1264	Likely ubiquitin-conjugating enzyme Ubc1p OS=Candida albicans (strain SC5314 / ATCC MYA-2876) GN=UBC1 PE=3 SV=1	Q59QX4_CANAL (+1)	25 kDa	0	0	3	0	0	0
1265	NADPH--cytochrome P450 reductase OS=Candida albicans (strain SC5314 / ATCC MYA-2876) GN=NCP1 PE=3 SV=1	Q5AFD5_CANAL	77 kDa	0	0	0	0	0	0
1266	Potential zinc finger transcription factor OS=Candida albicans (strain SC5314 / ATCC MYA-2876) GN=MSN4 PE=4 SV=1	Q5APL3_CANAL	83 kDa	0	0	0	0	0	0
1267	Protein RMD9, mitochondrial OS=Candida albicans (strain SC5314 / ATCC MYA-2876) GN=RMD9 PE=3 SV=1	RMD9_CANAL	70 kDa	0	0	3	0	0	0
1268	Putative uncharacterized protein ADH7 OS=Candida albicans (strain SC5314 / ATCC MYA-2876) GN=ADH7 PE=3 SV=1	Q5AC33_CANAL	40 kDa	0	0	3	0	0	0
1269	Cell division control protein 42 homolog OS=Candida albicans (strain SC5314 / ATCC MYA-2876) GN=CDC42 PE=3 SV=1	CDC42_CANAL	21 kDa	0	0	2	0	0	0
1270	Putative uncharacterized protein WRS1 OS=Candida albicans (strain SC5314 / ATCC MYA-2876) GN=WRS1 PE=3 SV=1	Q5A3P4_CANAL	48 kDa	0	0	3	0	0	0
1271	Likely RNA binding protein OS=Candida albicans (strain SC5314 / ATCC MYA-2876) GN=HRP1 PE=4 SV=1	Q5ANB5_CANAL	52 kDa	0	2	0	0	0	0
1272	Putative uncharacterized protein AGM1 OS=Candida albicans (strain SC5314 / ATCC MYA-2876) GN=AGM1 PE=3 SV=1	Q5AKW4_CANAL	60 kDa	0	0	2	0	0	0
1273	Putative uncharacterized protein OS=Candida albicans (strain SC5314 / ATCC MYA-2876) GN=CaO19.2269 PE=4 SV=1	Q59Z31_CANAL	28 kDa	0	0	2	0	0	0
1274	pH-responsive protein 1 OS=Candida albicans (strain SC5314 / ATCC MYA-2876) GN=PHR1 PE=2 SV=3	PHR1_CANAL	60 kDa	0	0	0	0	0	0
1275	Catabolic 3-dehydroquinase OS=Candida albicans (strain SC5314 / ATCC MYA-2876) GN=DQD1 PE=1 SV=2	3DHQ_CANAL	16 kDa	0	0	2	0	0	0
1276	Potential 26S proteasome regulatory particle subunit Rpn13p OS=Candida albicans (strain SC5314 / ATCC MYA-2876) GN=RPN13 PE=4 SV=1	Q59VN5_CANAL	18 kDa	0	0	1	0	0	0
1277	Putative uncharacterized protein CBP6 OS=Candida albicans (strain SC5314 / ATCC MYA-2876) GN=CBP6 PE=4 SV=1	Q5A2K4_CANAL	13 kDa	0	0	0	0	0	0
1278	3,4-dihydroxy-2-butanone 4-phosphate synthase OS=Candida albicans (strain SC5314 / ATCC MYA-2876) GN=RIB3 PE=1 SV=2	RIB3_CANAL	23 kDa	0	0	2	0	0	0
1279	Survival factor 1 OS=Candida albicans (strain SC5314 / ATCC MYA-2876) GN=SVF1 PE=3 SV=1	SVF1_CANAL	43 kDa	0	0	2	0	0	0
1280	Conserved fungal protein CFP2 OS=Candida albicans (strain SC5314 / ATCC MYA-2876) GN=FLC1 PE=4 SV=1	Q5A9Y3_CANAL	91 kDa	0	1	0	0	0	0
1281	Putative uncharacterized protein COX7 OS=Candida albicans (strain SC5314 / ATCC MYA-2876) GN=COX7 PE=4 SV=1	Q5AEP1_CANAL	13 kDa	0	0	1	0	0	0
1282	Copper transport protein CTR1 OS=Candida albicans (strain SC5314 / ATCC MYA-2876) GN=CTR1 PE=1 SV=1	CTR1_CANAL	28 kDa	0	0	2	0	0	0
1283	Hsp70 nucleotide exchange factor FES1 OS=Candida albicans (strain SC5314 / ATCC MYA-2876) GN=FES1 PE=3 SV=1	FES1_CANAL	32 kDa	0	0	0	0	0	0
1284	Cell division control protein 10 OS=Candida albicans (strain SC5314 / ATCC MYA-2876) GN=CDC10 PE=2 SV=1	CDC10_CANAL	41 kDa	0	0	1	0	0	0
1285	Putative uncharacterized protein OS=Candida albicans (strain SC5314 / ATCC MYA-2876) GN=CaO19.1796 PE=3 SV=1	Q59P08_CANAL	41 kDa	0	1	1	0	0	0
1286	Vacuolar multi-drug resistance ABC transporter OS=Candida albicans (strain SC5314 / ATCC MYA-2876) GN=MLT1 PE=4 SV=1	Q5A762_CANAL	181 kDa	0	0	0	0	0	0
1287	Putative uncharacterized protein OS=Candida albicans (strain SC5314 / ATCC MYA-2876) GN=CaO19.8838 PE=4 SV=1	Q5A456_CANAL (+1)	71 kDa	0	0	0	0	0	0
1288	Putative uncharacterized protein RVS161 OS=Candida albicans (strain SC5314 / ATCC MYA-2876) GN=RVS161 PE=4 SV=1	Q5AFE4_CANAL	34 kDa	0	0	1	0	0	0
1289	Ribosome biogenesis protein NSA1 OS=Candida albicans (strain SC5314 / ATCC MYA-2876) GN=NSA1 PE=3 SV=1	NSA1_CANAL	46 kDa	0	0	0	0	0	0
1290	Likely mitochondrial ribosomal protein L2 OS=Candida albicans (strain SC5314 / ATCC MYA-2876) GN=RML2 PE=4 SV=1	Q5A7P6_CANAL	42 kDa	0	0	0	0	0	0
1291	Putative uncharacterized protein OS=Candida albicans (strain SC5314 / ATCC MYA-2876) GN=CaO19.10995 PE=4 SV=1	Q59M77_CANAL	117 kDa	0	1	0	0	0	0
1292	Putative uncharacterized protein OS=Candida albicans (strain SC5314 / ATCC MYA-2876) GN=CaO19.7504 PE=4 SV=1	Q5AAI5_CANAL	34 kDa	0	0	0	0	0	0
1293	Likely mitochondrial ribosomal protein (E. coli L10) OS=Candida albicans (strain SC5314 / ATCC MYA-2876) GN=MRPL11 PE=3 SV=1	Q5A693_CANAL	29 kDa	0	0	1	0	0	0
1294	Putative uncharacterized protein OS=Candida albicans (strain SC5314 / ATCC MYA-2876) GN=CaO19.6388 PE=4 SV=1	Q5A3G2_CANAL-DECOY	?	0	0	0	0	0	2
1295	Enhancer of translation termination 1 OS=Candida albicans (strain SC5314 / ATCC MYA-2876) GN=ETT1 PE=3 SV=1	ETT1_CANAL	48 kDa	0	0	1	0	0	0
1296	Adenine deaminase OS=Candida albicans (strain SC5314 / ATCC MYA-2876) GN=AAH1 PE=3 SV=1	ADE_CANAL	41 kDa	0	2	0	0	0	0
1297	Putative uncharacterized protein OS=Candida albicans (strain SC5314 / ATCC MYA-2876) GN=CaO19.4686 PE=4 SV=1	Q5AMG0_CANAL (+1)	137 kDa	0	0	0	0	0	1
1298	Potential TOR protein/phosphatidylinositol kinase OS=Candida albicans (strain SC5314 / ATCC MYA-2876) GN=CaO19.1903 PE=4 SV=1	Q59U48_CANAL	157 kDa	0	0	0	0	0	0
1299	Putative uncharacterized protein OS=Candida albicans (strain SC5314 / ATCC MYA-2876) GN=CaO19.1334 PE=4 SV=1	Q59PN7_CANAL	74 kDa	0	0	0	0	0	0
1300	Prohibitin-like protein OS=Candida albicans (strain SC5314 / ATCC MYA-2876) GN=PHB2 PE=4 SV=1	Q5AND0_CANAL	34 kDa	0	0	1	0	0	0
1301	Putative uncharacterized protein OS=Candida albicans (strain SC5314 / ATCC MYA-2876) GN=CaO19.10437 PE=4 SV=1	Q5A199_CANAL	21 kDa	0	0	0	0	0	0
1302	Putative uncharacterized protein NPL6 OS=Candida albicans (strain SC5314 / ATCC MYA-2876) GN=NPL6 PE=4 SV=1	Q5AD12_CANAL-DECOY	?	0	0	0	0	0	0
1303	Putative uncharacterized protein OS=Candida albicans (strain SC5314 / ATCC MYA-2876) GN=CaO19.5574 PE=4 SV=1	Q5ABX6_CANAL	43 kDa	0	1	0	0	0	0
1304	Putative uncharacterized protein CPR51 OS=Candida albicans (strain SC5314 / ATCC MYA-2876) GN=CYP5 PE=3 SV=1	Q5A2Z0_CANAL	25 kDa	0	0	1	0	0	0
1305	Putative uncharacterized protein RDH54 OS=Candida albicans (strain SC5314 / ATCC MYA-2876) GN=RDH54 PE=4 SV=1	Q5A5N2_CANAL	90 kDa	0	1	0	0	0	0
1306	Probable kinetochore protein NUF2 OS=Candida albicans (strain SC5314 / ATCC MYA-2876) GN=NUF2 PE=3 SV=2	NUF2_CANAL	57 kDa	0	1	0	0	0	0
1307	Potential protein kinase regulator of (H+)-ATPase OS=Candida albicans (strain SC5314 / ATCC MYA-2876) GN=HRK1 PE=4 SV=1	Q5A7Q8_CANAL	79 kDa	0	1	0	0	0	0
1308	Potential CCR4-NOT complex associated factor Caf16p OS=Candida albicans (strain SC5314 / ATCC MYA-2876) GN=CAF16 PE=4 SV=1	Q59QD0_CANAL-DECOY	?	0	0	0	0	0	0
1309	Likely ubiquitin-conjugating enzyme e2 OS=Candida albicans (strain SC5314 / ATCC MYA-2876) GN=UBC4 PE=3 SV=1	Q5ACS1_CANAL	12 kDa	0	0	2	0	1	0
1310	Potential mitochondrial protein Fmp21 OS=Candida albicans (strain SC5314 / ATCC MYA-2876) GN=FMP21 PE=4 SV=1	Q5ALJ0_CANAL	16 kDa	0	0	1	0	0	1
1311	37S ribosomal protein S9, mitochondrial OS=Candida albicans (strain SC5314 / ATCC MYA-2876) GN=MRPS9 PE=2 SV=1	RT09_CANAL	39 kDa	0	0	1	0	0	0
1312	Potential acid sphingomyelin phosphodiesterase OS=Candida albicans (strain SC5314 / ATCC MYA-2876) GN=ASM1 PE=4 SV=1	Q5AMD9_CANAL	83 kDa	0	0	0	0	0	0
1313	Potential chromatin remodeling Snf/Swi complex subunit OS=Candida albicans (strain SC5314 / ATCC MYA-2876) GN=SNF5 PE=4 SV=1	Q5ANN0_CANAL	54 kDa	0	0	0	0	0	0
1314	Putative GTP cyclohydrolase 1 type 2 OS=Candida albicans (strain SC5314 / ATCC MYA-2876) GN=NIF3 PE=3 SV=1	Q59QA3_CANAL	23 kDa	0	0	0	0	1	0
1315	Chitin biosynthesis protein CHS5 OS=Candida albicans (strain SC5314 / ATCC MYA-2876) GN=CHS5 PE=3 SV=2	CHS5_CANAL-DECOY	?	0	0	0	0	0	0
1316	Putative uncharacterized protein STH1 OS=Candida albicans (strain SC5314 / ATCC MYA-2876) GN=STH1 PE=4 SV=1	Q5AEM9_CANAL	150 kDa	0	0	0	0	0	0
1317	Putative uncharacterized protein OS=Candida albicans (strain SC5314 / ATCC MYA-2876) GN=CaO19.11305 PE=4 SV=1	Q5A666_CANAL-DECOY	?	0	0	0	0	0	0
1318	2-dehydropantoate 2-reductase OS=Candida albicans (strain SC5314 / ATCC MYA-2876) GN=CaO19.2446 PE=3 SV=1	Q5AA38_CANAL-DECOY	?	0	0	0	0	0	0
1319	Putative uncharacterized protein MCM2 OS=Candida albicans (strain SC5314 / ATCC MYA-2876) GN=MCM2 PE=3 SV=1	Q5A034_CANAL	101 kDa	0	0	0	0	0	0
1320	Adenosine/AMP deaminase OS=Candida albicans (strain SC5314 / ATCC MYA-2876) GN=AMD1 PE=4 SV=1	Q5AHA6_CANAL	91 kDa	0	0	0	0	0	0
1321	Putative uncharacterized protein ARC40 OS=Candida albicans (strain SC5314 / ATCC MYA-2876) GN=ARC40 PE=4 SV=1	Q59V79_CANAL (+1)	42 kDa	0	0	0	0	0	0
1322	Cluster of Potential nuclear cohesin complex subunit OS=Candida albicans (strain SC5314 / ATCC MYA-2876) GN=SCC2 PE=4 SV=1 (Q5A187_CANAL-DECOY)	Q5A187_CANAL-DECOY	?	0	0	0	0	0	1
1322.1	Potential nuclear cohesin complex subunit OS=Candida albicans (strain SC5314 / ATCC MYA-2876) GN=CaO19.3080 PE=4 SV=1	Q5A115_CANAL-DECOY	?	0	0	0	0	0	1
1323	Putative uncharacterized protein SAM4 OS=Candida albicans (strain SC5314 / ATCC MYA-2876) GN=SAM4 PE=4 SV=1	Q59QD2_CANAL	34 kDa	0	0	3	0	0	0
1324	Putative uncharacterized protein OS=Candida albicans (strain SC5314 / ATCC MYA-2876) GN=CaO19.587 PE=4 SV=1	Q59X91_CANAL	45 kDa	0	3	0	0	0	0
1325	Putative uncharacterized protein RFC5 OS=Candida albicans (strain SC5314 / ATCC MYA-2876) GN=RFC5 PE=4 SV=1	Q5AD38_CANAL (+1)	41 kDa	0	0	0	0	0	0
1326	Potential glutaredoxin OS=Candida albicans (strain SC5314 / ATCC MYA-2876) GN=GRX3 PE=4 SV=1	Q5AF81_CANAL	28 kDa	0	0	3	0	0	0
1327	Alcohol dehydrogenase 2 OS=Candida albicans (strain SC5314 / ATCC MYA-2876) GN=ADH2 PE=1 SV=1	ADH2_CANAL	37 kDa	0	0	8	0	0	0
1328	Putative uncharacterized protein ERP3 OS=Candida albicans (strain SC5314 / ATCC MYA-2876) GN=ERP3 PE=3 SV=1	Q59ZG1_CANAL	25 kDa	0	0	1	0	0	0
1329	Putative uncharacterized protein WBP1 OS=Candida albicans (strain SC5314 / ATCC MYA-2876) GN=WBP1 PE=4 SV=1	Q59WK3_CANAL	50 kDa	0	0	1	0	0	0
1330	Putative uncharacterized protein ERG3 OS=Candida albicans (strain SC5314 / ATCC MYA-2876) GN=ERG3 PE=4 SV=1	Q59VG6_CANAL	45 kDa	0	0	1	0	0	0
1331	Potential peptide transporter OS=Candida albicans (strain SC5314 / ATCC MYA-2876) GN=PTR2 PE=3 SV=1	Q59ST2_CANAL	64 kDa	0	1	0	0	0	2
1332	Amidophosphoribosyltransferase OS=Candida albicans (strain SC5314 / ATCC MYA-2876) GN=ADE4 PE=3 SV=1	Q5A476_CANAL	60 kDa	0	0	1	0	0	0
1333	Potential epsin-like clathrin vesicle coat protein OS=Candida albicans (strain SC5314 / ATCC MYA-2876) GN=ENT3 PE=4 SV=1	Q5ALM4_CANAL	35 kDa	0	0	2	0	0	0
1334	Transcription and mRNA export factor SUS1 OS=Candida albicans (strain SC5314 / ATCC MYA-2876) GN=SUS1 PE=3 SV=1	SUS1_CANAL	14 kDa	0	0	0	0	0	2
1335	Putative uncharacterized protein OS=Candida albicans (strain SC5314 / ATCC MYA-2876) GN=CaO19.1544 PE=4 SV=1	Q5ALN3_CANAL	30 kDa	0	0	0	0	0	0
1336	Protein SUR7 OS=Candida albicans (strain SC5314 / ATCC MYA-2876) GN=SUR7 PE=1 SV=1	SUR7_CANAL	30 kDa	0	0	0	0	0	0
1337	pH-response transcription factor pacC/RIM101 OS=Candida albicans (strain SC5314 / ATCC MYA-2876) GN=RIM101 PE=1 SV=2	PACC_CANAL	75 kDa	0	0	0	0	0	0
1338	Putative uncharacterized protein OS=Candida albicans (strain SC5314 / ATCC MYA-2876) GN=CaO19.2095 PE=4 SV=1	Q5ACX2_CANAL	79 kDa	0	0	2	0	0	0
1339	Putative uncharacterized protein ARP3 OS=Candida albicans (strain SC5314 / ATCC MYA-2876) GN=ARP3 PE=3 SV=1	Q59Z11_CANAL	47 kDa	0	0	2	0	0	0
1340	Putative uncharacterized protein VPS29 OS=Candida albicans (strain SC5314 / ATCC MYA-2876) GN=VPS29 PE=4 SV=1	Q5AB94_CANAL	29 kDa	0	0	0	0	0	1
1341	Putative uncharacterized protein OS=Candida albicans (strain SC5314 / ATCC MYA-2876) GN=SKO1 PE=4 SV=1	Q59VR1_CANAL	43 kDa	0	0	0	0	0	1
1342	Putative uncharacterized protein ARP9 OS=Candida albicans (strain SC5314 / ATCC MYA-2876) GN=ARP9 PE=4 SV=1	Q5A9X7_CANAL	55 kDa	0	0	0	0	0	0
1343	Putative uncharacterized protein SXM1 OS=Candida albicans (strain SC5314 / ATCC MYA-2876) GN=SXM1 PE=4 SV=1	Q5A0H7_CANAL	114 kDa	0	0	1	0	0	0
1344	Likely anthranilate phosphoribosyl transferase OS=Candida albicans (strain SC5314 / ATCC MYA-2876) GN=TRP4 PE=4 SV=1	Q5A0Z7_CANAL (+1)	39 kDa	0	0	0	0	0	0
1345	Putative uncharacterized protein OS=Candida albicans (strain SC5314 / ATCC MYA-2876) GN=CaO19.11396 PE=3 SV=1	Q5AKA7_CANAL	48 kDa	0	0	1	0	0	0
1346	Putative uncharacterized protein OS=Candida albicans (strain SC5314 / ATCC MYA-2876) GN=CaO19.512 PE=4 SV=1	Q5A6P2_CANAL	117 kDa	0	0	1	0	0	0
1347	Putative uncharacterized protein OS=Candida albicans (strain SC5314 / ATCC MYA-2876) GN=CaO19.14176 PE=4 SV=1	Q59T30_CANAL	13 kDa	0	0	0	0	0	0
1348	Putative uncharacterized protein OS=Candida albicans (strain SC5314 / ATCC MYA-2876) GN=CaO19.3872 PE=4 SV=1	Q59V80_CANAL (+1)	30 kDa	0	0	0	0	0	0
1349	Putative uncharacterized protein YCP4 OS=Candida albicans (strain SC5314 / ATCC MYA-2876) GN=YCP4 PE=4 SV=1	Q59KV1_CANAL	30 kDa	0	0	1	0	0	0
1350	Potential mitochondrial inner membrane transporter Ymc1 OS=Candida albicans (strain SC5314 / ATCC MYA-2876) GN=YMC1 PE=3 SV=1	Q59WC2_CANAL	33 kDa	0	0	1	0	0	0
1351	Potential forkhead-like transcriptional regulator OS=Candida albicans (strain SC5314 / ATCC MYA-2876) GN=FKH2 PE=4 SV=1	Q5A7S7_CANAL	59 kDa	0	0	0	0	0	0
1352	Putative uncharacterized protein SOF1 OS=Candida albicans (strain SC5314 / ATCC MYA-2876) GN=SOF1 PE=4 SV=1	Q5A7Q9_CANAL	49 kDa	0	1	0	0	0	0
1353	Putative uncharacterized protein CBP3 OS=Candida albicans (strain SC5314 / ATCC MYA-2876) GN=CBP3 PE=4 SV=1	Q5AC35_CANAL	38 kDa	0	0	0	0	0	0
1354	Putative uncharacterized protein ADE17 OS=Candida albicans (strain SC5314 / ATCC MYA-2876) GN=ADE17 PE=4 SV=1	Q5A6R2_CANAL-DECOY	?	0	0	0	0	0	0
1355	Putative uncharacterized protein OS=Candida albicans (strain SC5314 / ATCC MYA-2876) GN=CaO19.10932 PE=4 SV=1	Q5A4L3_CANAL	56 kDa	0	1	0	0	0	0
1356	Putative uncharacterized protein RPB3 OS=Candida albicans (strain SC5314 / ATCC MYA-2876) GN=RPB3 PE=4 SV=1	Q5A462_CANAL	35 kDa	0	0	0	0	0	0
1357	Putative uncharacterized protein OS=Candida albicans (strain SC5314 / ATCC MYA-2876) GN=CaO19.13224 PE=3 SV=1	Q5A0K9_CANAL	39 kDa	0	1	0	0	0	0
1358	Putative uncharacterized protein FUM1 OS=Candida albicans (strain SC5314 / ATCC MYA-2876) GN=FUM1 PE=4 SV=1	Q5ADW6_CANAL	17 kDa	0	0	1	0	0	0
1359	Putative uncharacterized protein GLO1 OS=Candida albicans (strain SC5314 / ATCC MYA-2876) GN=GLO1 PE=4 SV=1	Q5ABB2_CANAL	40 kDa	0	0	1	0	0	0
1360	Potential mitochondrial Complex I, NUKM_20kd subunit OS=Candida albicans (strain SC5314 / ATCC MYA-2876) GN=FESUR1 PE=3 SV=1	Q5ADP7_CANAL	25 kDa	0	0	1	0	0	0
1361	Uncharacterized protein OS=Candida albicans (strain SC5314 / ATCC MYA-2876) GN=ASR2 PE=4 SV=1	Q5A423_CANAL	28 kDa	0	0	0	0	0	0
1362	Putative uncharacterized protein OS=Candida albicans (strain SC5314 / ATCC MYA-2876) GN=CaO19.12048 PE=4 SV=1	Q5AMR7_CANAL	35 kDa	0	0	1	0	0	0
1363	Putative uncharacterized protein OS=Candida albicans (strain SC5314 / ATCC MYA-2876) GN=CaO19.2257 PE=4 SV=1	Q59Z43_CANAL	39 kDa	0	0	1	0	0	0
1364	Putative uncharacterized protein OS=Candida albicans (strain SC5314 / ATCC MYA-2876) GN=CaO19.9089 PE=4 SV=1	Q5ALR2_CANAL (+1)	39 kDa	0	0	1	0	0	0
1365	Putative uncharacterized protein OS=Candida albicans (strain SC5314 / ATCC MYA-2876) GN=CaO19.14089 PE=4 SV=1	Q5ADP4_CANAL	94 kDa	0	1	0	0	0	0
1366	Chorismate synthase OS=Candida albicans (strain SC5314 / ATCC MYA-2876) GN=ARO2 PE=3 SV=1	Q59K34_CANAL-DECOY (+1)	?	0	0	0	0	0	0
1367	Chitin synthase export chaperone OS=Candida albicans (strain SC5314 / ATCC MYA-2876) GN=CHS7 PE=3 SV=1	CHS7_CANAL	35 kDa	0	1	0	0	0	0
1368	Putative uncharacterized protein OS=Candida albicans (strain SC5314 / ATCC MYA-2876) GN=CaO19.1272 PE=4 SV=1	Q5A436_CANAL	47 kDa	0	0	0	0	1	0
1369	Putative uncharacterized protein KAP104 OS=Candida albicans (strain SC5314 / ATCC MYA-2876) GN=KAP104 PE=4 SV=1	Q59ZG3_CANAL-DECOY	?	0	0	0	0	0	0
1370	Potential glycoprotein glucosyltransferase OS=Candida albicans (strain SC5314 / ATCC MYA-2876) GN=GLG2 PE=4 SV=1	Q5A2X7_CANAL-DECOY	?	0	0	0	0	0	0
1371	Opaque-specific ABC transporter CDR3 (Fragment) OS=Candida albicans (strain SC5314 / ATCC MYA-2876) GN=CDR3 PE=4 SV=1	Q59TM4_CANAL	108 kDa	0	0	0	0	0	0
1372	Potential DNA polymerase epsilon subunit OS=Candida albicans (strain SC5314 / ATCC MYA-2876) GN=DPB2 PE=4 SV=1	Q5ACS8_CANAL	81 kDa	0	0	0	0	0	0
1373	Putative uncharacterized protein OS=Candida albicans (strain SC5314 / ATCC MYA-2876) GN=CaO19.12126 PE=4 SV=1	Q5AMJ0_CANAL	73 kDa	0	0	0	0	0	0
1374	Uncharacterized protein OS=Candida albicans (strain SC5314 / ATCC MYA-2876) GN=CaO19.10057 PE=4 SV=1	Q5A9P1_CANAL	113 kDa	0	0	0	0	1	0
1375	Putative uncharacterized protein OS=Candida albicans (strain SC5314 / ATCC MYA-2876) GN=CaO19.11252 PE=4 SV=1	Q5A6C2_CANAL	136 kDa	0	2	0	0	0	0
1376	Potential intraperoxisomal protein receptor Pex7 OS=Candida albicans (strain SC5314 / ATCC MYA-2876) GN=PEX7 PE=4 SV=1	Q59WW3_CANAL-DECOY	?	0	0	0	0	0	0
1377	Putative uncharacterized protein OS=Candida albicans (strain SC5314 / ATCC MYA-2876) GN=CaO19.467 PE=4 SV=1	Q5A6T8_CANAL	74 kDa	0	0	0	0	0	0
1378	Putative uncharacterized protein OS=Candida albicans (strain SC5314 / ATCC MYA-2876) GN=CaO19.12703 PE=4 SV=1	Q5A3N1_CANAL	52 kDa	0	0	0	0	0	0
1379	Putative uncharacterized protein YAH1 OS=Candida albicans (strain SC5314 / ATCC MYA-2876) GN=YAH1 PE=4 SV=1	Q5AED2_CANAL	23 kDa	0	0	1	0	0	0
1380	Putative uncharacterized protein UTP21 OS=Candida albicans (strain SC5314 / ATCC MYA-2876) GN=UTP21 PE=4 SV=1	Q5ALL2_CANAL-DECOY	?	0	0	0	0	0	1
1381	Putative uncharacterized protein OS=Candida albicans (strain SC5314 / ATCC MYA-2876) GN=CaO19.5541 PE=4 SV=1	Q5AC10_CANAL (+1)	71 kDa	0	0	2	0	0	0
1382	Potential zinc finger protein OS=Candida albicans (strain SC5314 / ATCC MYA-2876) GN=CAS5 PE=4 SV=1	Q5AMH6_CANAL-DECOY	?	0	0	0	0	0	1
1383	Potential NADH-dependent flavin oxidoreductase OS=Candida albicans (strain SC5314 / ATCC MYA-2876) GN=OYE23 PE=4 SV=1	Q5A4K8_CANAL	46 kDa	0	0	3	0	0	1
1384	Flap endonuclease 1 OS=Candida albicans (strain SC5314 / ATCC MYA-2876) GN=RAD27 PE=3 SV=1	FEN1_CANAL	42 kDa	0	1	0	0	0	0
1385	Ferric reductase-like protein OS=Candida albicans (strain SC5314 / ATCC MYA-2876) GN=CaO19.867 PE=4 SV=1	Q5AHC9_CANAL (+1)	62 kDa	0	0	0	0	1	0
1386	DNA mismatch repair protein HSM3 OS=Candida albicans (strain SC5314 / ATCC MYA-2876) GN=HSM3 PE=3 SV=1	HSM3_CANAL	55 kDa	0	0	0	0	0	1
1387	Likely 26S proteasome regulatory particle subunit Rpn9p OS=Candida albicans (strain SC5314 / ATCC MYA-2876) GN=RPN9 PE=4 SV=1	Q5AD74_CANAL	49 kDa	0	0	1	0	0	0
1388	Maintenance of telomere capping protein 6 OS=Candida albicans (strain SC5314 / ATCC MYA-2876) GN=MTC6 PE=3 SV=1	MTC6_CANAL	70 kDa	0	0	0	0	0	0
1389	Putative uncharacterized protein OS=Candida albicans (strain SC5314 / ATCC MYA-2876) GN=CaO19.12305 PE=4 SV=1	Q5APC3_CANAL	13 kDa	0	0	0	0	0	0
1390	Possible DNA binding apoptosis-related protein OS=Candida albicans (strain SC5314 / ATCC MYA-2876) GN=CaO19.713 PE=4 SV=1	Q59U19_CANAL (+1)	15 kDa	0	0	1	0	0	0
1391	Likely fatty acid desaturase OS=Candida albicans (strain SC5314 / ATCC MYA-2876) GN=OLE2 PE=3 SV=1	Q59Z36_CANAL-DECOY	?	0	1	0	0	0	0
1392	Potential zinc finger protein OS=Candida albicans (strain SC5314 / ATCC MYA-2876) GN=CaO19.14005 PE=4 SV=1	Q5ADX8_CANAL	45 kDa	0	0	0	0	0	0
1393	Putative uncharacterized protein THI6 OS=Candida albicans (strain SC5314 / ATCC MYA-2876) GN=THI6 PE=3 SV=1	Q5AEJ1_CANAL-DECOY	?	0	0	0	0	0	0
1394	NADH-ubiquinone oxidoreductase chain 3 OS=Candida albicans (strain SC5314 / ATCC MYA-2876) GN=NAD3 PE=3 SV=2	NU3M_CANAL	15 kDa	0	0	1	0	0	0
1395	Putative uncharacterized protein PMT2 OS=Candida albicans (strain SC5314 / ATCC MYA-2876) GN=PMT2 PE=4 SV=1	Q5ADM9_CANAL	88 kDa	0	0	0	0	0	0
1396	Likely voltage-gated chloride channel OS=Candida albicans (strain SC5314 / ATCC MYA-2876) GN=GEF12 PE=4 SV=1	Q59V42_CANAL	110 kDa	0	0	0	0	0	0
1397	Likely mitochondrial ribosomal protein (E. coli LS6) OS=Candida albicans (strain SC5314 / ATCC MYA-2876) GN=MRP17 PE=4 SV=1	Q5A4Z9_CANAL	14 kDa	0	0	1	0	0	1
1398	Putative uncharacterized protein HAA1 OS=Candida albicans (strain SC5314 / ATCC MYA-2876) GN=CUP2 PE=4 SV=1	Q5AKX6_CANAL	64 kDa	0	0	0	0	0	1
1399	Putative uncharacterized protein OS=Candida albicans (strain SC5314 / ATCC MYA-2876) GN=CaO19.12190 PE=4 SV=1	Q5APN8_CANAL (+1)	18 kDa	0	0	1	0	0	0
1400	Likely protein kinase OS=Candida albicans (strain SC5314 / ATCC MYA-2876) GN=YCK2 PE=4 SV=1	Q59YS3_CANAL	56 kDa	0	0	0	0	0	0
1401	Putative uncharacterized protein OS=Candida albicans (strain SC5314 / ATCC MYA-2876) GN=CaO19.9784 PE=4 SV=1	Q59Z56_CANAL-DECOY	?	0	1	0	0	0	0
1402	Likely U3 snoRNP complex component LCP5p OS=Candida albicans (strain SC5314 / ATCC MYA-2876) GN=LCP5 PE=4 SV=1	Q5A2Y9_CANAL	44 kDa	0	0	1	0	0	0
1403	Orf in C. albicans Major Repeat Sequence, RB2 region OS=Candida albicans (strain SC5314 / ATCC MYA-2876) GN=CaO19.6896 PE=4 SV=1	Q59S56_CANAL	57 kDa	0	1	0	0	0	0
1404	Putative uncharacterized protein ERG9 OS=Candida albicans (strain SC5314 / ATCC MYA-2876) GN=ERG9 PE=4 SV=1	Q59Y33_CANAL	51 kDa	0	0	0	0	0	0
1405	Likely mitochondrial ribosomal small subunit protein OS=Candida albicans (strain SC5314 / ATCC MYA-2876) GN=MRPS35 PE=4 SV=1	Q59ZF9_CANAL	19 kDa	0	0	1	0	0	0
1406	Putative uncharacterized protein OS=Candida albicans (strain SC5314 / ATCC MYA-2876) GN=CaO19.9054 PE=4 SV=1	Q5ALU7_CANAL-DECOY (+1)	?	0	0	0	0	0	0
1407	Cluster of Putative uncharacterized protein OS=Candida albicans (strain SC5314 / ATCC MYA-2876) GN=CaO19.9673 PE=4 SV=1 (Q59RJ3_CANAL)	Q59RJ3_CANAL	14 kDa	1	0	0	1	0	0
1407.1	Putative uncharacterized protein OS=Candida albicans (strain SC5314 / ATCC MYA-2876) GN=CaO19.9673 PE=4 SV=1	Q59RJ3_CANAL	14 kDa	1	0	0	1	0	0
1408	Cluster of Homoserine kinase OS=Candida albicans (strain SC5314 / ATCC MYA-2876) GN=THR1 PE=3 SV=2 (KHSE_CANAL)	KHSE_CANAL	39 kDa	0	0	3	0	0	0
1408.1	Homoserine kinase OS=Candida albicans (strain SC5314 / ATCC MYA-2876) GN=THR1 PE=3 SV=2	KHSE_CANAL	39 kDa	0	0	3	0	0	0
1409	Putative uncharacterized protein RPB8 OS=Candida albicans (strain SC5314 / ATCC MYA-2876) GN=RPB8 PE=4 SV=1	Q59MZ8_CANAL	17 kDa	0	0	0	0	0	0
1410	Putative uncharacterized protein UBC9 OS=Candida albicans (strain SC5314 / ATCC MYA-2876) GN=UBC9 PE=3 SV=1	Q5A339_CANAL	26 kDa	0	0	3	0	0	0
1411	Putative uncharacterized protein OS=Candida albicans (strain SC5314 / ATCC MYA-2876) GN=CaO19.1480 PE=4 SV=1	Q5ALU6_CANAL	20 kDa	0	0	0	0	0	0
1412	Putative uncharacterized protein OS=Candida albicans (strain SC5314 / ATCC MYA-2876) GN=RNR22 PE=4 SV=1	Q59U83_CANAL	46 kDa	0	0	3	0	0	0
1413	Histone chaperone ASF1 OS=Candida albicans (strain SC5314 / ATCC MYA-2876) GN=ASF1 PE=3 SV=1	ASF1_CANAL	28 kDa	0	0	0	0	0	0
1414	Putative uncharacterized protein GLY11 OS=Candida albicans (strain SC5314 / ATCC MYA-2876) GN=GLY1 PE=4 SV=1	Q59NC4_CANAL	42 kDa	0	0	1	0	0	0
1415	Putative uncharacterized protein LYS1 (Fragment) OS=Candida albicans (strain SC5314 / ATCC MYA-2876) GN=LYS1 PE=4 SV=1	Q59P14_CANAL	32 kDa	0	0	2	0	0	0
1416	Potential reductase, flavodoxin OS=Candida albicans (strain SC5314 / ATCC MYA-2876) GN=CQR1 PE=4 SV=1	Q59Z58_CANAL (+1)	21 kDa	0	0	0	0	0	0
1417	Malate dehydrogenase OS=Candida albicans (strain SC5314 / ATCC MYA-2876) GN=MDH1-3 PE=3 SV=1	Q5A5S6_CANAL	36 kDa	0	0	2	0	0	0
1418	Putative uncharacterized protein OS=Candida albicans (strain SC5314 / ATCC MYA-2876) GN=CaO19.7603 PE=4 SV=1	Q5ACN9_CANAL	13 kDa	0	0	0	0	0	0
1419	Presequence translocated-associated motor subunit PAM17, mitochondrial OS=Candida albicans (strain SC5314 / ATCC MYA-2876) GN=PAM17 PE=3 SV=2	PAM17_CANAL	21 kDa	0	0	0	0	0	0
1420	Potential peroxisomal lipid carrier OS=Candida albicans (strain SC5314 / ATCC MYA-2876) GN=POX181 PE=4 SV=1	Q5AJ84_CANAL	14 kDa	0	0	1	0	0	0
1421	Putative uncharacterized protein OS=Candida albicans (strain SC5314 / ATCC MYA-2876) GN=CaO19.11460 PE=4 SV=1	Q5AK43_CANAL	41 kDa	0	0	0	0	0	0
1422	Potential zinc finger protein OS=Candida albicans (strain SC5314 / ATCC MYA-2876) GN=MIG2 PE=4 SV=1	Q5A5S3_CANAL	30 kDa	0	1	0	0	0	1
1423	Delta-aminolevulinic acid dehydratase OS=Candida albicans (strain SC5314 / ATCC MYA-2876) GN=HEM2 PE=3 SV=1	Q5AH98_CANAL	37 kDa	0	0	1	0	0	0
1424	Putative uncharacterized protein MRS5 OS=Candida albicans (strain SC5314 / ATCC MYA-2876) GN=MRS5 PE=4 SV=1	Q5AMM6_CANAL	12 kDa	0	0	0	0	0	1
1425	Putative uncharacterized protein NSP1 OS=Candida albicans (strain SC5314 / ATCC MYA-2876) GN=NSP1 PE=4 SV=1	Q5AH96_CANAL	75 kDa	0	0	1	0	0	0
1426	Likely 26S proteasome regulatory particle subunit Rpn12p OS=Candida albicans (strain SC5314 / ATCC MYA-2876) GN=RPN12 PE=4 SV=1	Q59SD0_CANAL	32 kDa	0	0	1	0	0	0
1427	Ras-like protein 1 OS=Candida albicans (strain SC5314 / ATCC MYA-2876) GN=RAS1 PE=3 SV=1	RAS1_CANAL	33 kDa	0	0	2	0	0	0
1428	Potential mRNA deadenylase and CCR4-NOT complex subunit Not5p OS=Candida albicans (strain SC5314 / ATCC MYA-2876) GN=NOT5 PE=4 SV=1	Q5A755_CANAL-DECOY	?	0	0	0	0	0	0
1429	Putative uncharacterized protein RTG1 OS=Candida albicans (strain SC5314 / ATCC MYA-2876) GN=RTG1 PE=4 SV=1	Q5APP3_CANAL	30 kDa	0	0	0	0	0	0
1430	Putative uncharacterized protein OS=Candida albicans (strain SC5314 / ATCC MYA-2876) GN=CaO19.7047 PE=4 SV=1	Q5AFM1_CANAL	27 kDa	0	0	0	0	0	0
1431	Putative uncharacterized protein OS=Candida albicans (strain SC5314 / ATCC MYA-2876) GN=CaO19.788 PE=4 SV=1	Q5AHK7_CANAL	13 kDa	0	0	0	0	0	0
1432	Putative uncharacterized protein NOP4 OS=Candida albicans (strain SC5314 / ATCC MYA-2876) GN=NOP4 PE=4 SV=1	Q59KZ0_CANAL	84 kDa	0	0	0	0	0	0
1433	Potential ATP binding cassette protein OS=Candida albicans (strain SC5314 / ATCC MYA-2876) GN=MODF PE=4 SV=1	Q5AKU8_CANAL-DECOY	?	0	0	0	0	1	0
1434	Potential intramitochondrial sorting family protein OS=Candida albicans (strain SC5314 / ATCC MYA-2876) GN=CaO19.6600 PE=4 SV=1	Q59NL5_CANAL	23 kDa	0	0	0	0	0	0
1435	Putative uncharacterized protein OS=Candida albicans (strain SC5314 / ATCC MYA-2876) GN=CaO19.14105 PE=4 SV=1	Q5ADM8_CANAL-DECOY	?	0	0	0	0	0	1
1436	Potential NAD-formate dehydrogenase OS=Candida albicans (strain SC5314 / ATCC MYA-2876) GN=FDH1 PE=3 SV=1	Q59QN6_CANAL	42 kDa	0	0	1	0	0	0
1437	Putative uncharacterized protein OS=Candida albicans (strain SC5314 / ATCC MYA-2876) GN=CaO19.1889 PE=4 SV=1	Q59U62_CANAL	27 kDa	0	0	0	0	0	0
1438	Putative uncharacterized protein OS=Candida albicans (strain SC5314 / ATCC MYA-2876) GN=CaO19.10782 PE=4 SV=1	Q5A857_CANAL	38 kDa	0	0	0	0	0	0
1439	Putative uncharacterized protein OS=Candida albicans (strain SC5314 / ATCC MYA-2876) GN=CaO19.11765 PE=4 SV=1	Q5AG90_CANAL	13 kDa	0	0	0	0	0	0
1440	Putative uncharacterized protein OS=Candida albicans (strain SC5314 / ATCC MYA-2876) GN=CaO19.1835 PE=4 SV=1	Q59LW7_CANAL	71 kDa	0	1	0	0	0	0
1441	Pre-mRNA-splicing factor CWC25 OS=Candida albicans (strain SC5314 / ATCC MYA-2876) GN=CWC25 PE=3 SV=1	CWC25_CANAL	26 kDa	0	0	0	0	0	0
1442	Potential sterol homeostasis protein OS=Candida albicans (strain SC5314 / ATCC MYA-2876) GN=NCR1 PE=4 SV=1	Q59ZV0_CANAL	141 kDa	0	0	0	0	0	0
1443	Putative uncharacterized protein VIP1 OS=Candida albicans (strain SC5314 / ATCC MYA-2876) GN=VIP1 PE=4 SV=1	Q5A4W6_CANAL	84 kDa	0	1	0	0	0	0
1444	Potential monooxygenase OS=Candida albicans (strain SC5314 / ATCC MYA-2876) GN=SOX1 PE=4 SV=1	Q59YG1_CANAL	57 kDa	0	0	0	0	0	0
1445	Putative uncharacterized protein OS=Candida albicans (strain SC5314 / ATCC MYA-2876) GN=CaO19.557 PE=4 SV=1	Q59KQ2_CANAL-DECOY	?	0	0	0	0	0	0
1446	Potential p-nitrophenyl phosphatase OS=Candida albicans (strain SC5314 / ATCC MYA-2876) GN=PHO15 PE=4 SV=1	Q59WC5_CANAL	34 kDa	0	0	1	0	0	0
1447	Potential Mn2+ homeostasis protein OS=Candida albicans (strain SC5314 / ATCC MYA-2876) GN=CaO19.11497 PE=4 SV=1	Q5AK06_CANAL	56 kDa	0	1	0	0	0	0
1448	Potential polyamine transporter OS=Candida albicans (strain SC5314 / ATCC MYA-2876) GN=TPO3 PE=4 SV=1	Q5APM9_CANAL	65 kDa	0	0	0	0	0	1
1449	Likely oxysterol-binding protein OS=Candida albicans (strain SC5314 / ATCC MYA-2876) GN=KES1 PE=3 SV=1	Q59T34_CANAL	48 kDa	0	1	0	0	0	0
1450	Protein FYV4, mitochondrial OS=Candida albicans (strain SC5314 / ATCC MYA-2876) GN=FYV4 PE=3 SV=1	FYV4_CANAL	20 kDa	0	0	0	0	0	0
1451	Pre-rRNA-processing protein PNO1 OS=Candida albicans (strain SC5314 / ATCC MYA-2876) GN=PNO1 PE=3 SV=1	PNO1_CANAL	31 kDa	0	0	0	0	0	0
1452	Likely Hsp90 system cochaperone OS=Candida albicans (strain SC5314 / ATCC MYA-2876) GN=AHA1 PE=4 SV=1	Q5ACP0_CANAL	39 kDa	0	0	1	0	0	0
1453	Rho-like small GTP binding protein OS=Candida albicans (strain SC5314 / ATCC MYA-2876) GN=CRL1 PE=3 SV=1	Q5A904_CANAL	39 kDa	0	0	0	0	0	0
1454	Potential transcriptional repressor subunit OS=Candida albicans (strain SC5314 / ATCC MYA-2876) GN=BUR6 PE=4 SV=1	Q5AF72_CANAL	16 kDa	0	0	0	0	0	1
1455	Putative uncharacterized protein OS=Candida albicans (strain SC5314 / ATCC MYA-2876) GN=CaO19.2426 PE=4 SV=1	Q59UD8_CANAL (+1)	30 kDa	0	0	1	0	0	0
1456	Putative uncharacterized protein GSF2 OS=Candida albicans (strain SC5314 / ATCC MYA-2876) GN=GSF2 PE=4 SV=1	Q5AB90_CANAL	44 kDa	0	0	1	0	0	0
1457	Potential non-classical secretion pathway protein OS=Candida albicans (strain SC5314 / ATCC MYA-2876) GN=NCE102 PE=4 SV=1	Q5ANE3_CANAL	18 kDa	0	0	1	0	0	0
1458	Putative uncharacterized protein RPC31 OS=Candida albicans (strain SC5314 / ATCC MYA-2876) GN=RPC31 PE=4 SV=1	Q5A212_CANAL	32 kDa	0	0	0	0	0	1
1459	Putative uncharacterized protein OS=Candida albicans (strain SC5314 / ATCC MYA-2876) GN=CaO19.12453 PE=4 SV=1	Q5AKZ1_CANAL-DECOY	?	0	1	0	0	0	0
1460	Biofilm and cell wall regulator 1 OS=Candida albicans (strain SC5314 / ATCC MYA-2876) GN=BCR1 PE=1 SV=1	BCR1_CANAL	81 kDa	0	0	0	0	0	1
1461	Putative uncharacterized protein PRS11 OS=Candida albicans (strain SC5314 / ATCC MYA-2876) GN=PRS11 PE=4 SV=1	Q5A4X7_CANAL	44 kDa	0	0	0	0	0	0
1462	Putative uncharacterized protein NRP1 OS=Candida albicans (strain SC5314 / ATCC MYA-2876) GN=NRP1 PE=4 SV=1	Q5A791_CANAL	85 kDa	0	0	0	0	0	0
1463	Putative uncharacterized protein OS=Candida albicans (strain SC5314 / ATCC MYA-2876) GN=CaO19.12356 PE=4 SV=1	Q5AP72_CANAL-DECOY (+1)	?	0	0	0	0	0	0
1464	Putative uncharacterized protein OS=Candida albicans (strain SC5314 / ATCC MYA-2876) GN=CaO19.10311 PE=4 SV=1	Q59PV0_CANAL	11 kDa	0	0	0	0	0	0
1465	Glutathione peroxidase OS=Candida albicans (strain SC5314 / ATCC MYA-2876) GN=GPX2 PE=3 SV=1	Q59WD3_CANAL	20 kDa	0	0	0	0	0	0
1466	Putative uncharacterized protein VTI1 OS=Candida albicans (strain SC5314 / ATCC MYA-2876) GN=VTI1 PE=4 SV=1	Q5AED1_CANAL (+1)	25 kDa	0	0	0	0	0	1
1467	Putative uncharacterized protein OS=Candida albicans (strain SC5314 / ATCC MYA-2876) GN=CaO19.1236 PE=4 SV=1	Q5A473_CANAL-DECOY	?	0	0	0	0	0	0
1468	Putative uncharacterized protein CAP1 OS=Candida albicans (strain SC5314 / ATCC MYA-2876) GN=CAP1 PE=4 SV=1	G1UB70_CANAL (+1)	55 kDa	0	0	0	0	0	0
1469	Likely mitochondrial ribosomal protein S17 OS=Candida albicans (strain SC5314 / ATCC MYA-2876) GN=MRPS17 PE=3 SV=1	Q59SJ6_CANAL	29 kDa	0	0	0	0	0	0
1470	Potential fatty acyltransferase OS=Candida albicans (strain SC5314 / ATCC MYA-2876) GN=SLC1 PE=4 SV=1	Q5AEL8_CANAL	32 kDa	0	0	0	0	0	0
1471	Nitrilase superfamily protein OS=Candida albicans (strain SC5314 / ATCC MYA-2876) GN=NIT3 PE=4 SV=1	Q59WF0_CANAL	33 kDa	0	0	1	0	0	0
1472	Putative uncharacterized protein OS=Candida albicans (strain SC5314 / ATCC MYA-2876) GN=CaO19.12943 PE=4 SV=1	Q59P48_CANAL	20 kDa	0	2	0	0	0	0
1473	Likely rab family GTP-binding protein OS=Candida albicans (strain SC5314 / ATCC MYA-2876) GN=YPT31 PE=3 SV=1	Q59KX4_CANAL	25 kDa	0	0	2	0	0	0
1474	Potential subunit common to RNA polymerase I, II and III OS=Candida albicans (strain SC5314 / ATCC MYA-2876) GN=RPO26 PE=3 SV=1	Q59QT0_CANAL	18 kDa	0	0	0	0	0	0
1475	NADH-cytochrome b5 reductase 1 OS=Candida albicans (strain SC5314 / ATCC MYA-2876) GN=CBR1 PE=3 SV=1	NCB5R_CANAL	32 kDa	0	0	0	0	0	0
1476	Putative uncharacterized protein CBF1 OS=Candida albicans (strain SC5314 / ATCC MYA-2876) GN=CBF1 PE=4 SV=1	Q5A1E3_CANAL	26 kDa	0	0	0	0	0	0
1477	Potential guanine nucleotide exchange factor eIF-2B delta subunit OS=Candida albicans (strain SC5314 / ATCC MYA-2876) GN=GCD2 PE=3 SV=1	Q5ADR6_CANAL	56 kDa	0	0	1	0	0	0
1478	Likely RAB family GTP binding protein involved in secretion OS=Candida albicans (strain SC5314 / ATCC MYA-2876) GN=YPT1 PE=3 SV=1	Q5AI00_CANAL	23 kDa	0	0	1	0	0	0
1479	Adenylyl cyclase-associated protein OS=Candida albicans (strain SC5314 / ATCC MYA-2876) GN=SRV2 PE=3 SV=1	Q5A6P9_CANAL	60 kDa	0	0	0	0	0	0
1480	Putative uncharacterized protein OS=Candida albicans (strain SC5314 / ATCC MYA-2876) GN=DUR3 PE=3 SV=1	Q59P00_CANAL	57 kDa	0	0	0	0	0	1
1481	Putative uncharacterized protein SWP1 OS=Candida albicans (strain SC5314 / ATCC MYA-2876) GN=SWP1 PE=4 SV=1	Q5AHZ2_CANAL	31 kDa	0	0	0	0	0	0
1482	Putative uncharacterized protein ARP7 OS=Candida albicans (strain SC5314 / ATCC MYA-2876) GN=ARP7 PE=3 SV=1	Q5AI25_CANAL	48 kDa	0	0	0	0	0	0
1483	Putative uncharacterized protein ALG7 OS=Candida albicans (strain SC5314 / ATCC MYA-2876) GN=ALG7 PE=4 SV=1	Q5A2S8_CANAL-DECOY	?	0	0	0	0	0	0
1484	Putative uncharacterized protein PMT4 OS=Candida albicans (strain SC5314 / ATCC MYA-2876) GN=PMT4 PE=4 SV=1	Q59X23_CANAL	87 kDa	0	0	0	0	0	0
1485	Putative uncharacterized protein SFH1 OS=Candida albicans (strain SC5314 / ATCC MYA-2876) GN=SFH1 PE=4 SV=1	Q5A769_CANAL	41 kDa	0	0	0	0	0	0
1486	Nuclear fusion protein KAR5 OS=Candida albicans (strain SC5314 / ATCC MYA-2876) GN=KAR5 PE=3 SV=1	KAR5_CANAL-DECOY	?	0	0	0	0	0	0
1487	Putative uncharacterized protein YTA12 OS=Candida albicans (strain SC5314 / ATCC MYA-2876) GN=YTA12 PE=3 SV=1	Q5AD10_CANAL	96 kDa	0	0	1	0	0	0
1488	Putative uncharacterized protein OS=Candida albicans (strain SC5314 / ATCC MYA-2876) GN=CaO19.875 PE=4 SV=1	Q5AHC1_CANAL	48 kDa	0	0	0	0	0	0
1489	Putative uncharacterized protein NIC96 OS=Candida albicans (strain SC5314 / ATCC MYA-2876) GN=NIC96 PE=4 SV=1	Q5AD65_CANAL	109 kDa	0	0	0	0	0	0
1490	Cell wall protein IFF6 OS=Candida albicans (strain SC5314 / ATCC MYA-2876) GN=IFF6 PE=1 SV=1	IFF6_CANAL	106 kDa	0	0	0	0	0	0
1491	Methyltransferase-related protein OS=Candida albicans (strain SC5314 / ATCC MYA-2876) GN=CaO19.8372 PE=4 SV=1	Q59VL8_CANAL	37 kDa	0	0	1	0	0	0
1492	Putative uncharacterized protein OS=Candida albicans (strain SC5314 / ATCC MYA-2876) GN=PUF3 PE=4 SV=1	Q59P09_CANAL	102 kDa	0	0	0	0	0	0
1493	Putative uncharacterized protein OS=Candida albicans (strain SC5314 / ATCC MYA-2876) GN=CaO19.247 PE=4 SV=1	Q5AEM1_CANAL	28 kDa	0	0	0	0	0	0
1494	Likely uridine kinase OS=Candida albicans (strain SC5314 / ATCC MYA-2876) GN=URA6 PE=3 SV=1	Q59KZ3_CANAL	31 kDa	0	0	0	0	0	0
1495	Putative uncharacterized protein OST1 OS=Candida albicans (strain SC5314 / ATCC MYA-2876) GN=OST1 PE=4 SV=1	Q59YT5_CANAL	54 kDa	0	0	0	0	0	1
1496	Potential cystathionine beta-synthase OS=Candida albicans (strain SC5314 / ATCC MYA-2876) GN=CYS4 PE=4 SV=1	Q5A0E3_CANAL	39 kDa	0	0	1	0	0	0
1497	Likely mitochondrial ribosomal protein L16 OS=Candida albicans (strain SC5314 / ATCC MYA-2876) GN=MRPL16 PE=3 SV=1	Q5AD48_CANAL (+1)	24 kDa	0	0	1	0	0	0
1498	Putative uncharacterized protein GLC8 OS=Candida albicans (strain SC5314 / ATCC MYA-2876) GN=GLC8 PE=4 SV=1	Q5AF97_CANAL	25 kDa	0	0	0	0	0	0
1499	Glycylpeptide N-tetradecanoyltransferase OS=Candida albicans (strain SC5314 / ATCC MYA-2876) GN=NMT1 PE=1 SV=1	NMT_CANAL	52 kDa	0	0	1	0	0	0
1500	Likely protein kinase OS=Candida albicans (strain SC5314 / ATCC MYA-2876) GN=SPS1 PE=4 SV=1	Q5AI03_CANAL	53 kDa	0	0	0	0	0	0
1501	Putative uncharacterized protein OS=Candida albicans (strain SC5314 / ATCC MYA-2876) GN=CaO19.14142 PE=4 SV=1	Q59RB0_CANAL	32 kDa	0	0	0	0	0	0
1502	Likely 26S proteasome regulatory particle subunit Rpn5p OS=Candida albicans (strain SC5314 / ATCC MYA-2876) GN=RPN5 PE=4 SV=1	Q5AJY7_CANAL	32 kDa	0	0	1	0	0	0
1503	Putative uncharacterized protein IME4 OS=Candida albicans (strain SC5314 / ATCC MYA-2876) GN=IME4 PE=4 SV=1	Q5ALV0_CANAL	63 kDa	0	0	0	0	0	0
1504	Kynureninase OS=Candida albicans (strain SC5314 / ATCC MYA-2876) GN=BNA5 PE=3 SV=1	KYNU_CANAL-DECOY	?	0	1	0	0	0	0
1505	Acyl-coenzyme A oxidase OS=Candida albicans (strain SC5314 / ATCC MYA-2876) GN=POX1 PE=3 SV=1	Q5A8M5_CANAL	74 kDa	0	0	0	0	0	0
1506	Putative uncharacterized protein OS=Candida albicans (strain SC5314 / ATCC MYA-2876) GN=CaO19.4070 PE=4 SV=1	Q59XL1_CANAL	32 kDa	0	0	0	0	0	1
1507	Potential tRNA-specific adenosine deaminase OS=Candida albicans (strain SC5314 / ATCC MYA-2876) GN=TAD1 PE=4 SV=1	Q5AFF8_CANAL	39 kDa	0	0	0	0	0	0
1508	Putative uncharacterized protein OS=Candida albicans (strain SC5314 / ATCC MYA-2876) GN=CaO19.3604 PE=4 SV=1	Q59Y45_CANAL (+1)	44 kDa	0	0	0	0	0	0
1509	Mannan polymerase complex subunit MNN9 OS=Candida albicans (strain SC5314 / ATCC MYA-2876) GN=MNN9 PE=3 SV=1	MNN9_CANAL	43 kDa	0	0	0	0	0	0
1510	Putative uncharacterized protein NCB2 OS=Candida albicans (strain SC5314 / ATCC MYA-2876) GN=NCB2 PE=4 SV=1	Q5A0I6_CANAL	17 kDa	0	0	0	0	0	1
1511	Conserved fungal protein CFP3 OS=Candida albicans (strain SC5314 / ATCC MYA-2876) GN=FLC3 PE=4 SV=1	Q5A2K7_CANAL	81 kDa	0	1	0	0	0	0
1512	Putative uncharacterized protein OS=Candida albicans (strain SC5314 / ATCC MYA-2876) GN=CaO19.1897 PE=4 SV=1	Q59U54_CANAL	40 kDa	0	0	0	0	0	0
1513	Putative uncharacterized protein SIS2 OS=Candida albicans (strain SC5314 / ATCC MYA-2876) GN=SIS2 PE=4 SV=1	Q5A4F6_CANAL	59 kDa	0	0	1	0	0	0
1514	Possible mitochondrial protein OS=Candida albicans (strain SC5314 / ATCC MYA-2876) GN=CaO19.1440 PE=4 SV=1	Q59KN7_CANAL-DECOY	?	0	0	0	0	0	1
1515	Enhanced filamentous growth protein 1 OS=Candida albicans (strain SC5314 / ATCC MYA-2876) GN=EFG1 PE=1 SV=1	EFG1_CANAL	59 kDa	0	0	0	0	0	1
1516	Putative uncharacterized protein COQ6 OS=Candida albicans (strain SC5314 / ATCC MYA-2876) GN=COQ6 PE=4 SV=1	Q5AHZ4_CANAL	53 kDa	0	0	0	0	0	0
1517	Putative uncharacterized protein OS=Candida albicans (strain SC5314 / ATCC MYA-2876) GN=CaO19.632 PE=4 SV=1	Q59QP2_CANAL (+1)	47 kDa	0	0	0	0	0	0
1518	Putative uncharacterized protein OS=Candida albicans (strain SC5314 / ATCC MYA-2876) GN=CaO19.12004 PE=4 SV=1	Q59TA2_CANAL	19 kDa	0	0	0	0	0	0
1519	Putative uncharacterized protein OS=Candida albicans (strain SC5314 / ATCC MYA-2876) GN=CaO19.7139 PE=4 SV=1	Q5A0F6_CANAL	16 kDa	0	0	0	1	0	0
1520	Potential mitochondrial Complex I, NUAM_75kd subunit OS=Candida albicans (strain SC5314 / ATCC MYA-2876) GN=CaO19.7590 PE=4 SV=1	Q5ACQ2_CANAL	25 kDa	0	0	0	0	0	0
1521	Carbohydrate metabolism regulator TYE7 OS=Candida albicans (strain SC5314 / ATCC MYA-2876) GN=TYE7 PE=1 SV=1	TYE7_CANAL	31 kDa	0	0	0	0	0	0
1522	Potential COMPASS histone methyltransferase component OS=Candida albicans (strain SC5314 / ATCC MYA-2876) GN=ASH2 PE=4 SV=1	Q5AK56_CANAL-DECOY	?	0	0	0	0	0	0
1523	Cell wall protein PGA31 OS=Candida albicans (strain SC5314 / ATCC MYA-2876) GN=PGA31 PE=1 SV=1	PGA31_CANAL-DECOY	?	0	0	0	0	0	0
1524	Potential U3 snoRNP protein Utp30 OS=Candida albicans (strain SC5314 / ATCC MYA-2876) GN=UTP30 PE=4 SV=1	Q59LH9_CANAL	42 kDa	0	0	0	0	0	0
1525	Putative uncharacterized protein OS=Candida albicans (strain SC5314 / ATCC MYA-2876) GN=PNG2 PE=4 SV=1	Q59T41_CANAL	112 kDa	0	0	0	0	0	0
1526	Putative uncharacterized protein OS=Candida albicans (strain SC5314 / ATCC MYA-2876) GN=CaO19.12784 PE=4 SV=1	Q5A5S4_CANAL	24 kDa	0	0	0	0	0	0
1527	Acyl-protein thioesterase 1 OS=Candida albicans (strain SC5314 / ATCC MYA-2876) GN=CaO19.11723 PE=3 SV=2	APTH1_CANAL	25 kDa	0	0	1	0	0	0
1528	Induced during hyphae development protein 1 OS=Candida albicans (strain SC5314 / ATCC MYA-2876) GN=IHD1 PE=1 SV=1	IHD1_CANAL	37 kDa	0	0	1	0	0	0
1529	Mitochondrial homologous recombination protein 1 OS=Candida albicans (strain SC5314 / ATCC MYA-2876) GN=MHR1 PE=3 SV=1	MHR1_CANAL	28 kDa	0	0	0	0	0	0
1530	Putative uncharacterized protein OS=Candida albicans (strain SC5314 / ATCC MYA-2876) GN=CaO19.11570 PE=4 SV=1	Q59X42_CANAL	47 kDa	0	0	1	0	0	0
1531	Putative uncharacterized protein OS=Candida albicans (strain SC5314 / ATCC MYA-2876) GN=CaO19.7263 PE=3 SV=1	Q59ZS8_CANAL	51 kDa	0	0	1	0	0	0
1532	Potential ankyrin repeat protein OS=Candida albicans (strain SC5314 / ATCC MYA-2876) GN=YAR1 PE=4 SV=1	Q5A0D5_CANAL	24 kDa	0	0	1	0	0	0
1533	Uncharacterized protein OS=Candida albicans (strain SC5314 / ATCC MYA-2876) GN=CaO19.7322 PE=4 SV=1	Q5A3Y7_CANAL	17 kDa	0	0	1	0	0	0
1534	Putative uncharacterized protein OS=Candida albicans (strain SC5314 / ATCC MYA-2876) GN=CaO19.11260 PE=4 SV=1	Q5A6B1_CANAL	30 kDa	0	0	1	0	0	0
1535	Putative uncharacterized protein SIK1 OS=Candida albicans (strain SC5314 / ATCC MYA-2876) GN=SIK1 PE=4 SV=1	Q5ACS3_CANAL	58 kDa	0	0	0	0	0	0
1536	Potential glucosamine phosphate N-acetyl tranferase (GNAT family) OS=Candida albicans (strain SC5314 / ATCC MYA-2876) GN=GNA1 PE=4 SV=1	Q5AHF9_CANAL	17 kDa	0	0	0	0	0	0
1537	Putative uncharacterized protein BUD20 OS=Candida albicans (strain SC5314 / ATCC MYA-2876) GN=BUD20 PE=4 SV=1	Q5AIB9_CANAL (+1)	21 kDa	0	0	1	0	0	0
1538	Putative uncharacterized protein OS=Candida albicans (strain SC5314 / ATCC MYA-2876) GN=CaO19.12293 PE=4 SV=1	Q5APD5_CANAL	12 kDa	0	0	0	0	0	0
1539	Respiratory growth induced protein 1 OS=Candida albicans (strain SC5314 / ATCC MYA-2876) GN=RGI1 PE=2 SV=1	RGI1_CANAL	24 kDa	0	0	1	0	0	0
1540	Putative uncharacterized protein OS=Candida albicans (strain SC5314 / ATCC MYA-2876) GN=CaO19.10239 PE=4 SV=1	Q5AF83_CANAL-DECOY (+1)	?	0	1	0	0	0	0
1541	Putative uncharacterized protein HNT1 OS=Candida albicans (strain SC5314 / ATCC MYA-2876) GN=HNT1 PE=4 SV=1	Q59WG0_CANAL	17 kDa	0	0	1	0	0	0
1542	DNA-directed RNA polymerase subunit OS=Candida albicans (strain SC5314 / ATCC MYA-2876) GN=RPA12 PE=3 SV=1	Q59Z13_CANAL	14 kDa	0	0	1	0	0	0
1543	Putative uncharacterized protein SNF12 OS=Candida albicans (strain SC5314 / ATCC MYA-2876) GN=SNF12 PE=4 SV=1	Q59Z35_CANAL	54 kDa	0	0	1	0	0	0
1544	Putative uncharacterized protein APA2 OS=Candida albicans (strain SC5314 / ATCC MYA-2876) GN=APA2 PE=4 SV=1	Q5ABS0_CANAL (+1)	42 kDa	0	0	1	0	0	0
1545	Phosphorylase OS=Candida albicans (strain SC5314 / ATCC MYA-2876) GN=GPH1 PE=3 SV=1	Q5AFP7_CANAL	103 kDa	0	0	1	0	0	0
1546	Potential fungal zinc cluster transcription factor OS=Candida albicans (strain SC5314 / ATCC MYA-2876) GN=ZCF8 PE=4 SV=1	Q5AJ74_CANAL	107 kDa	0	0	1	0	0	0
1547	Potential farnesyl carboxyl methyltransferase OS=Candida albicans (strain SC5314 / ATCC MYA-2876) GN=STE141 PE=4 SV=1	Q59WT2_CANAL	31 kDa	0	0	1	0	0	0
1548	Putative uncharacterized protein OS=Candida albicans (strain SC5314 / ATCC MYA-2876) GN=PGA52 PE=4 SV=1	Q59L52_CANAL (+1)	41 kDa	0	0	0	0	0	0
1549	Agglutinin-like protein 1 OS=Candida albicans (strain SC5314 / ATCC MYA-2876) GN=ALS1 PE=1 SV=1	ALS1_CANAL	133 kDa	0	0	0	0	1	0
1550	Putative uncharacterized protein OS=Candida albicans (strain SC5314 / ATCC MYA-2876) GN=CaO19.11066 PE=4 SV=1	Q59ZD7_CANAL	27 kDa	0	1	0	0	0	0
1551	Potential Protein Phosphatase I regulatory subunit OS=Candida albicans (strain SC5314 / ATCC MYA-2876) GN=SHP1 PE=4 SV=1	Q5A9L6_CANAL	41 kDa	0	0	0	0	0	0
1552	Putative uncharacterized protein ISA1 OS=Candida albicans (strain SC5314 / ATCC MYA-2876) GN=ISA1 PE=4 SV=1	Q5AC29_CANAL	30 kDa	0	0	0	0	0	0
1553	Putative uncharacterized protein OS=Candida albicans (strain SC5314 / ATCC MYA-2876) GN=CaO19.11815 PE=4 SV=1	Q5AG39_CANAL	38 kDa	0	0	0	0	0	0
1554	Putative uncharacterized protein OS=Candida albicans (strain SC5314 / ATCC MYA-2876) GN=CaO19.12320 PE=4 SV=1	Q5APA8_CANAL	32 kDa	0	0	0	0	0	0
1555	Putative uncharacterized protein NOG2 OS=Candida albicans (strain SC5314 / ATCC MYA-2876) GN=NOG2 PE=4 SV=1	Q5A8L6_CANAL	21 kDa	0	0	0	0	0	0
1556	Putative uncharacterized protein OS=Candida albicans (strain SC5314 / ATCC MYA-2876) GN=CaO19.1551 PE=4 SV=1	Q5ALM5_CANAL	19 kDa	0	0	0	0	0	1
1557	Putative uncharacterized protein OS=Candida albicans (strain SC5314 / ATCC MYA-2876) GN=CaO19.10289 PE=4 SV=1	Q5AF32_CANAL	15 kDa	0	1	0	0	0	0
1558	Potential fungal zinc cluster transcription factor OS=Candida albicans (strain SC5314 / ATCC MYA-2876) GN=UPC2 PE=4 SV=1	Q59QC7_CANAL	77 kDa	0	0	0	0	0	0
1559	Putative uncharacterized protein OS=Candida albicans (strain SC5314 / ATCC MYA-2876) GN=CaO19.8278 PE=4 SV=1	Q59WA3_CANAL	13 kDa	0	0	0	0	0	0
1560	Putative uncharacterized protein RTG3 OS=Candida albicans (strain SC5314 / ATCC MYA-2876) GN=RTG3 PE=4 SV=1	Q59WI6_CANAL	57 kDa	0	0	0	0	0	0
1561	Putative uncharacterized protein OS=Candida albicans (strain SC5314 / ATCC MYA-2876) GN=CaO19.11473 PE=4 SV=1	Q5AK30_CANAL	19 kDa	0	0	0	0	0	0
1562	Putative uncharacterized protein OS=Candida albicans (strain SC5314 / ATCC MYA-2876) GN=CaO19.7905 PE=4 SV=1	Q5AEY0_CANAL	37 kDa	0	0	0	0	1	0
1563	Likely nucleolar ribosomal biogenesis factor RPF1p OS=Candida albicans (strain SC5314 / ATCC MYA-2876) GN=RPF1 PE=4 SV=1	Q5AFD8_CANAL	35 kDa	0	0	0	0	0	0
1564	Potential fungal zinc cluster transcription factor OS=Candida albicans (strain SC5314 / ATCC MYA-2876) GN=UGA3 PE=4 SV=1	Q5ACS2_CANAL	91 kDa	0	0	0	0	0	0
1565	ATPase GET3 OS=Candida albicans (strain SC5314 / ATCC MYA-2876) GN=GET3 PE=3 SV=1	GET3_CANAL-DECOY	?	0	0	0	0	0	0
1566	Probable kinetochore protein NUF2 OS=Candida albicans (strain SC5314 / ATCC MYA-2876) GN=NUF2 PE=3 SV=2	NUF2_CANAL-DECOY	?	0	0	0	0	0	0
1567	Putative uncharacterized protein OS=Candida albicans (strain SC5314 / ATCC MYA-2876) GN=CaO19.2131 PE=4 SV=1	Q59RI9_CANAL	89 kDa	0	0	0	0	0	0
1568	Putative uncharacterized protein STC99 OS=Candida albicans (strain SC5314 / ATCC MYA-2876) GN=STC99 PE=4 SV=1	Q59Z71_CANAL-DECOY	?	0	0	0	0	0	0
1569	Putative uncharacterized protein DCD1 OS=Candida albicans (strain SC5314 / ATCC MYA-2876) GN=DCD1 PE=4 SV=1	Q59ZU8_CANAL-DECOY	?	0	0	0	0	0	0
1570	Potential fungal zinc cluster transcription factor OS=Candida albicans (strain SC5314 / ATCC MYA-2876) GN=ZCF22 PE=4 SV=1	Q5AGR5_CANAL-DECOY	?	0	0	0	0	0	0
1571	RNA polymerase II fourth largest subunit OS=Candida albicans (strain SC5314 / ATCC MYA-2876) GN=RPB4 PE=4 SV=1	Q59LI7_CANAL	16 kDa	0	0	0	0	0	0
1572	Likely protein kinase OS=Candida albicans (strain SC5314 / ATCC MYA-2876) GN=PBS2 PE=4 SV=1	Q5A4E6_CANAL	59 kDa	0	0	0	0	0	0
1573	Potential steroid 5-alpha-reductase OS=Candida albicans (strain SC5314 / ATCC MYA-2876) GN=TSC13 PE=4 SV=1	Q5A941_CANAL (+1)	36 kDa	0	0	0	0	0	0
1574	Putative uncharacterized protein GIM5 OS=Candida albicans (strain SC5314 / ATCC MYA-2876) GN=GIM5 PE=4 SV=1	Q5AA13_CANAL	18 kDa	0	0	0	0	0	0
1575	Putative uncharacterized protein OS=Candida albicans (strain SC5314 / ATCC MYA-2876) GN=CaO19.13938 PE=3 SV=1	Q5AGV3_CANAL	14 kDa	0	0	0	0	0	0
1576	Putative uncharacterized protein OS=Candida albicans (strain SC5314 / ATCC MYA-2876) GN=CaO19.12483 PE=3 SV=1	Q5AKW1_CANAL	14 kDa	0	0	0	0	0	0
1577	Protein FMP52, mitochondrial OS=Candida albicans (strain SC5314 / ATCC MYA-2876) GN=FMP52 PE=3 SV=1	FMP52_CANAL	24 kDa	0	0	0	0	0	0
1578	NADH-ubiquinone oxidoreductase chain 5 OS=Candida albicans (strain SC5314 / ATCC MYA-2876) GN=NAD5 PE=3 SV=2	NU5M_CANAL	62 kDa	0	0	0	0	0	0
1579	Potential RNA Polymerase I and III shared subunit Rpc19 OS=Candida albicans (strain SC5314 / ATCC MYA-2876) GN=RPC19 PE=4 SV=1	Q59LT9_CANAL	15 kDa	0	0	0	0	0	0
1580	Likely proteasome subunit Pup2 OS=Candida albicans (strain SC5314 / ATCC MYA-2876) GN=PUP2 PE=4 SV=1	Q59PZ1_CANAL	28 kDa	0	0	0	0	0	0
1581	Likely 60s ribosomal subunit nuclear export factor NMD3 OS=Candida albicans (strain SC5314 / ATCC MYA-2876) GN=NMD3 PE=4 SV=1	Q59PZ4_CANAL	59 kDa	0	0	0	0	0	0
1582	Likely proteasome regulatory particle ATPase Rpt2p OS=Candida albicans (strain SC5314 / ATCC MYA-2876) GN=RPT2 PE=4 SV=1	Q5A7M6_CANAL	52 kDa	0	0	0	0	0	0
1583	Uncharacterized protein OS=Candida albicans (strain SC5314 / ATCC MYA-2876) GN=PTC2 PE=3 SV=1	Q5A9C7_CANAL (+1)	65 kDa	0	0	0	0	0	0
1584	Potential translational activator of COX1 OS=Candida albicans (strain SC5314 / ATCC MYA-2876) GN=MSS51 PE=4 SV=1	Q5ACR5_CANAL	51 kDa	0	0	0	0	0	0
1585	Eukaryotic translation initiation factor 3 subunit H OS=Candida albicans (strain SC5314 / ATCC MYA-2876) GN=CaO19.14040 PE=3 SV=1	Q5ADU3_CANAL	37 kDa	0	0	0	0	0	0
1586	Likely cytochrome b5 OS=Candida albicans (strain SC5314 / ATCC MYA-2876) GN=CYB5 PE=3 SV=1	Q5AFL9_CANAL	14 kDa	0	0	0	0	0	0
1587	Potential sterol binding protein OS=Candida albicans (strain SC5314 / ATCC MYA-2876) GN=CaO19.6867 PE=4 SV=1	Q59T50_CANAL	15 kDa	0	0	1	0	0	0
1588	Putative uncharacterized protein OS=Candida albicans (strain SC5314 / ATCC MYA-2876) GN=CaO19.8744 PE=4 SV=1	Q59TY1_CANAL	31 kDa	0	0	1	0	0	0
1589	Likely nucleolar ribosomal biogenesis factor RPF2p OS=Candida albicans (strain SC5314 / ATCC MYA-2876) GN=RPF2 PE=4 SV=1	Q59ZG6_CANAL	38 kDa	0	0	1	0	0	0
1590	Likely 26S proteasome regulatory particle subunit Rpn11p OS=Candida albicans (strain SC5314 / ATCC MYA-2876) GN=RPN11 PE=4 SV=1	Q59ZS7_CANAL	35 kDa	0	0	1	0	0	0
1591	Uncharacterized protein OS=Candida albicans (strain SC5314 / ATCC MYA-2876) GN=PRE8 PE=4 SV=1	Q5A3X4_CANAL	28 kDa	0	0	1	0	0	0
1592	Putative uncharacterized protein OS=Candida albicans (strain SC5314 / ATCC MYA-2876) GN=CaO19.11317 PE=4 SV=1	Q5A653_CANAL	29 kDa	0	0	1	0	0	0
1593	Putative uncharacterized protein OS=Candida albicans (strain SC5314 / ATCC MYA-2876) GN=CaO19.13477 PE=4 SV=1	Q5ABB4_CANAL	26 kDa	0	0	1	0	0	0
1594	Putative uncharacterized protein OS=Candida albicans (strain SC5314 / ATCC MYA-2876) GN=CaO19.14049 PE=4 SV=1	Q5ADT4_CANAL	33 kDa	0	0	1	0	0	0
1595	Ribulose-phosphate 3-epimerase OS=Candida albicans (strain SC5314 / ATCC MYA-2876) GN=RPE1 PE=3 SV=1	Q5AFG0_CANAL	25 kDa	0	0	1	0	0	0
1596	Putative uncharacterized protein OS=Candida albicans (strain SC5314 / ATCC MYA-2876) GN=CaO19.1691 PE=4 SV=1	Q5AJA1_CANAL	23 kDa	0	0	1	0	0	0
1597	Putative uncharacterized protein PRE1 OS=Candida albicans (strain SC5314 / ATCC MYA-2876) GN=PRE1 PE=3 SV=1	Q5AJZ5_CANAL	22 kDa	0	0	1	0	0	0
1598	Uroporphyrinogen decarboxylase OS=Candida albicans (strain SC5314 / ATCC MYA-2876) GN=HEM12 PE=3 SV=1	Q5A5N0_CANAL	41 kDa	0	0	1	0	0	0
END OF FILE

## Sheet: 2. Cas5 Interactors by SAINT
SAINT analysis of the Cas5 interactors identified by co-immunoprecipitation coupled with mass spectrometry.
Bait	Prey	FC_A	FC_B	SAINT
Cas5	Q59TI4_CANAL	18.38	18.27	1
Cas5	Q5AL18_CANAL	4.94	4.6	0.55
Cas5	Q5A409_CANAL	2.41	2.29	0.51
Cas5	Q59QB8_CANAL	5.04	4.42	0.47
Cas5	Q59X49_CANAL	1.24	0.96	0.32
Cas5	LCL2_CANAL	1.19	1.19	0.3
Cas5	CAF20_CANAL	1.7	1.45	0.28
Cas5	Q59KY7_CANAL	1.76	1.34	0.28
Cas5	DFG5_CANAL	2.19	1.59	0.27
Cas5	Q59XC8_CANAL	4.7	2.3	0.27
Cas5	H2A2_CANAL	2.45	2.39	0.26
Cas5	Q5AC67_CANAL	2.27	1.96	0.24
Cas5	PRK1_CANAL	1.48	1.19	0.22
Cas5	Q5A9D4_CANAL	1.96	1.37	0.21
Cas5	NACB_CANAL	1.47	1.42	0.19
Cas5	CHZ1_CANAL	0.98	0.66	0.18
Cas5	Q5A3Q1_CANAL	1.26	0.88	0.18
Cas5	Q5A998_CANAL	1.63	1.18	0.18
Cas5	Q5AHH7_CANAL	1.59	1.04	0.16
Cas5	Q5A3G2_CANAL-DECOY	1.93	1.56	0.16
Cas5	Q5AG61_CANAL	1.93	1.56	0.16
Cas5	Q5AFD2_CANAL	1.31	1.06	0.14
Cas5	ADH2_CANAL-DECOY	2.4	1.73	0.14
Cas5	Q5ALS8_CANAL	0.99	0.8	0.13
Cas5	Q5A3Y2_CANAL	1.25	1.08	0.12
Cas5	Q59LZ9_CANAL	1.46	1.18	0.12
Cas5	EDC1_CANAL	3.41	2.67	0.12
Cas5	Q59MJ8_CANAL	1	0.93	0.1
Cas5	Q59Y38_CANAL	1.88	1.41	0.1
Cas5	Q5A8X6_CANAL	0.99	0.71	0.08
Cas5	Q5ALM6_CANAL	1.07	0.87	0.08
Cas5	Q59QN7_CANAL	1.18	0.95	0.08
Cas5	Q5A1M8_CANAL	1.41	1.08	0.08
Cas5	Q5A7N6_CANAL	0.84	0.71	0.07
Cas5	DUT_CANAL	1.09	0.94	0.07
Cas5	Q5AK04_CANAL	1.93	1.69	0.07
Cas5	DEF1_CANAL	0.85	0.69	0.06
Cas5	Q59VN4_CANAL	3.08	3.04	0.06
Cas5	Q59KL5_CANAL	0.66	0.53	0.05
Cas5	Q5A222_CANAL	0.95	0.71	0.04
Cas5	Q5A8Y4_CANAL	1.09	0.94	0.04
Cas5	SSD1_CANAL	0.75	0.61	0.03
Cas5	Q59YN8_CANAL	0.8	0.76	0.03
Cas5	Q59QX3_CANAL	0.85	0.56	0.03
Cas5	Q5AAK4_CANAL	1.08	0.87	0.03
Cas5	Q59T31_CANAL	1.33	1.23	0.03
Cas5	IF4E_CANAL	1.68	1.41	0.03
Cas5	Q5AB84_CANAL	2.13	2.03	0.03
Cas5	Q5ABT7_CANAL	0.78	0.68	0.02
Cas5	HSP77_CANAL	0.85	0.53	0.02
Cas5	Q5A8A4_CANAL	0.88	0.72	0.02
Cas5	Q5AHF6_CANAL	0.89	0.83	0.02
Cas5	Q5AF62_CANAL	0.94	0.7	0.02
Cas5	MBF1_CANAL	0.95	0.9	0.02
Cas5	NACA_CANAL	1.05	0.93	0.02
Cas5	ESF2_CANAL	1.06	0.7	0.02
Cas5	Q5A786_CANAL	1.19	0.88	0.02
Cas5	Q5APK5_CANAL	1.21	0.87	0.02
Cas5	Q59ZH8_CANAL	1.26	0.94	0.02
Cas5	Q5A7P7_CANAL	1.44	0.84	0.02
Cas5	Q5ANP6_CANAL	1.96	1.95	0.02
Cas5	Q5AMP4_CANAL	0.57	0.41	0.01
Cas5	SPT5_CANAL	0.59	0.59	0.01
Cas5	Q59US9_CANAL	0.6	0.48	0.01
Cas5	Q5AMI6_CANAL	0.8	0.75	0.01
Cas5	Q5A3Z7_CANAL	0.86	0.66	0.01
Cas5	RL13_CANAL	1.08	1.07	0.01
Cas5	Q5A516_CANAL	1.26	1.26	0.01
Cas5	APE2_CANAL	0	0	0
Cas5	MIA40_CANAL	0	0	0
Cas5	Q59T99_CANAL	0	0	0
Cas5	Q5A2Z0_CANAL	0	0	0
Cas5	TBP_CANAL	0	0	0
Cas5	Q5AML9_CANAL	0	0	0
Cas5	Q5A294_CANAL	0	0	0
Cas5	Q59K34_CANAL	0	0	0
Cas5	APT_CANAL	0	0	0
Cas5	Q5AJ74_CANAL	0	0	0
Cas5	Q5A3P4_CANAL	0	0	0
Cas5	Q59VX7_CANAL	0	0	0
Cas5	Q5A850_CANAL	0	0	0
Cas5	Q5AAS8_CANAL	0	0	0
Cas5	COX1_CANAL	0	0	0
Cas5	Q5A6R2_CANAL	0	0	0
Cas5	Q5AND4_CANAL	0	0	0
Cas5	Q5AD10_CANAL	0	0	0
Cas5	Q5A653_CANAL	0	0	0
Cas5	Q5A5N2_CANAL	0	0	0
Cas5	Q5AMH7_CANAL	0	0	0
Cas5	Q59S64_CANAL	0	0	0
Cas5	Q59W75_CANAL	0	0	0
Cas5	MRH4_CANAL	0	0	0
Cas5	Q59MZ5_CANAL	0	0	0
Cas5	Q5A9A5_CANAL	0	0	0
Cas5	Q59Z31_CANAL	0	0	0
Cas5	Q59LK3_CANAL-DECOY	0	0	0
Cas5	CLU_CANAL	0	0	0
Cas5	Q59M77_CANAL	0	0	0
Cas5	Q5A967_CANAL	0	0	0
Cas5	Q59Z41_CANAL	0	0	0
Cas5	Q5AGZ6_CANAL	0	0	0
Cas5	ARO1_CANAL	0	0	0
Cas5	Q59VL8_CANAL	0	0	0
Cas5	Q5A2A0_CANAL	0	0	0
Cas5	Q59ZZ5_CANAL	0	0	0
Cas5	Q59SJ2_CANAL	0	0	0
Cas5	Q59KV2_CANAL	0	0	0
Cas5	Q5A9B0_CANAL	0	0	0
Cas5	ADH2_CANAL	0	0	0
Cas5	Q59K02_CANAL-DECOY	0	0	0
Cas5	Q5AH73_CANAL-DECOY	0	0	0
Cas5	Q59PT2_CANAL	0	0	0
Cas5	EIF3B_CANAL	0	0	0
Cas5	Q5ACP0_CANAL	0	0	0
Cas5	ACH1_CANAL	0	0	0
Cas5	FKBP_CANAL	0	0	0
Cas5	CTR1_CANAL	0	0	0
Cas5	RGI1_CANAL	0	0	0
Cas5	Q5ADW6_CANAL	0	0	0
Cas5	Q5A8Z3_CANAL	0	0	0
Cas5	Q59UF7_CANAL	0	0	0
Cas5	Q59LW7_CANAL	0	0	0
Cas5	Q59M49_CANAL	0	0	0
Cas5	RT25_CANAL	0	0	0
Cas5	Q5A2A7_CANAL	0	0	0
Cas5	Q5A8Z4_CANAL	0	0	0
Cas5	MS116_CANAL	0	0	0
Cas5	Q5AK65_CANAL	0	0	0
Cas5	CBF5_CANAL	0	0	0
Cas5	Q59P43_CANAL	0	0	0
Cas5	BNR1_CANAL	0	0	0
Cas5	Q5AGE6_CANAL	0	0	0
Cas5	Q59TD9_CANAL	0	0	0
Cas5	G1UB69_CANAL [2]	0	0	0
Cas5	Q5AJG6_CANAL	0	0	0
Cas5	CDC42_CANAL	0	0	0
Cas5	Q5A473_CANAL	0	0	0
Cas5	Q5AHA0_CANAL	0	0	0
Cas5	Q59T06_CANAL-DECOY	0	0	0
Cas5	Q5AI39_CANAL	0	0	0
Cas5	EAF7_CANAL	0	0	0
Cas5	Q59TZ8_CANAL	0	0	0
Cas5	Q59S56_CANAL	0	0	0
Cas5	Q5AN95_CANAL-DECOY	0	0	0
Cas5	Q5A4W6_CANAL	0	0	0
Cas5	Q5A889_CANAL	0	0	0
Cas5	Q5AKU8_CANAL	0	0	0
Cas5	Q5AEG8_CANAL	0	0	0
Cas5	SAR1_CANAL	0	0	0
Cas5	Q5A096_CANAL	0	0	0
Cas5	Q59Z11_CANAL	0	0	0
Cas5	Q5A2A3_CANAL	0	0	0
Cas5	NU3M_CANAL	0	0	0
Cas5	Q5A2X1_CANAL	0	0	0
Cas5	RHO1_CANAL	0	0	0
Cas5	PYRD_CANAL	0	0	0
Cas5	Q5AC04_CANAL	0	0	0
Cas5	Q5A2Y9_CANAL	0	0	0
Cas5	Q5ABB1_CANAL	0	0	0
Cas5	Q59PP7_CANAL [2]	0	0	0
Cas5	Q59QX4_CANAL	0	0	0
Cas5	FHP_CANAL	0	0	0
Cas5	Q5APB7_CANAL-DECOY	0	0	0
Cas5	KAPR_CANAL	0	0	0
Cas5	Q5AC03_CANAL	0	0	0
Cas5	Q5AJE2_CANAL	0	0	0
Cas5	ACS2_CANAL	0	0	0
Cas5	Q5A3N8_CANAL	0	0	0
Cas5	EIF3I_CANAL	0	0	0
Cas5	Q5AA48_CANAL	0	0	0
Cas5	SNU13_CANAL	0	0	0
Cas5	Q59PP1_CANAL-DECOY	0	0	0
Cas5	Q5AJZ7_CANAL	0	0	0
Cas5	PURA_CANAL	0	0	0
Cas5	Q5AJX0_CANAL	0	0	0
Cas5	Q5AJ84_CANAL	0	0	0
Cas5	Q59WT2_CANAL	0	0	0
Cas5	Q5APL0_CANAL	0	0	0
Cas5	HAS1_CANAL	0	0	0
Cas5	Q59KU9_CANAL	0	0	0
Cas5	Q59NY3_CANAL	0	0	0
Cas5	OXR1_CANAL	0	0	0
Cas5	Q5AKA7_CANAL	0	0	0
Cas5	Q59KP3_CANAL	0	0	0
Cas5	Q59PS9_CANAL	0	0	0
Cas5	Q5AGB4_CANAL	0	0	0
Cas5	Q59NQ5_CANAL	0	0	0
Cas5	Q5AH14_CANAL	0	0	0
Cas5	LIPA_CANAL-DECOY	0	0	0
Cas5	Q59S60_CANAL	0	0	0
Cas5	Q59PP7_CANAL	0	0	0
Cas5	Q5ANE7_CANAL	0	0	0
Cas5	RAS1_CANAL	0	0	0
Cas5	RIB3_CANAL	0	0	0
Cas5	Q5AMR7_CANAL	0	0	0
Cas5	Q5ABB2_CANAL	0	0	0
Cas5	Q5ALM8_CANAL	0	0	0
Cas5	Q59JV0_CANAL	0	0	0
Cas5	Q5AL46_CANAL	0	0	0
Cas5	Q59NG6_CANAL	0	0	0
Cas5	Q5AHJ6_CANAL-DECOY	0	0	0
Cas5	Q5A0X3_CANAL	0	0	0
Cas5	Q59NC4_CANAL	0	0	0
Cas5	Q5AGX9_CANAL	0	0	0
Cas5	Q5AN95_CANAL	0	0	0
Cas5	Q59JY1_CANAL	0	0	0
Cas5	Q5A474_CANAL	0	0	0
Cas5	Q59N73_CANAL	0	0	0
Cas5	Q5A5E3_CANAL	0	0	0
Cas5	Q5A6P5_CANAL	0	0	0
Cas5	Q5AJB9_CANAL	0	0	0
Cas5	Q5A0K9_CANAL	0	0	0
Cas5	Q5A2J7_CANAL	0	0	0
Cas5	Q5A2W3_CANAL	0	0	0
Cas5	Q59QN6_CANAL	0	0	0
Cas5	Q5AJZ5_CANAL	0	0	0
Cas5	ADE_CANAL	0	0	0
Cas5	Q5AG89_CANAL	0	0	0
Cas5	Q5A7T8_CANAL	0	0	0
Cas5	Q5AQ59_CANAL	0	0	0
Cas5	Q59PD8_CANAL	0	0	0
Cas5	Q59W33_CANAL	0	0	0
Cas5	Q59LQ4_CANAL	0	0	0
Cas5	Q5A006_CANAL	0	0	0
Cas5	Q5A2T3_CANAL-DECOY	0	0	0
Cas5	Q59TR9_CANAL	0	0	0
Cas5	SEC24_CANAL	0	0	0
Cas5	Q5A8L7_CANAL	0	0	0
Cas5	Q59V92_CANAL	0	0	0
Cas5	GLYC_CANAL	0	0	0
Cas5	Q5AEN2_CANAL-DECOY	0	0	0
Cas5	SC61A_CANAL	0	0	0
Cas5	Q5A779_CANAL	0	0	0
Cas5	Q59X42_CANAL	0	0	0
Cas5	Q5AHK8_CANAL	0	0	0
Cas5	Q5A666_CANAL	0	0	0
Cas5	Q59TE2_CANAL	0	0	0
Cas5	Q59LB4_CANAL	0	0	0
Cas5	MTAP_CANAL	0	0	0
Cas5	RT09_CANAL	0	0	0
Cas5	Q5ACI7_CANAL	0	0	0
Cas5	Q5AFK4_CANAL	0	0	0
Cas5	Q5A369_CANAL	0	0	0
Cas5	Q5ALP9_CANAL	0	0	0
Cas5	Q59R87_CANAL-DECOY	0	0	0
Cas5	Q5A9Y3_CANAL	0	0	0
Cas5	Q5AH98_CANAL	0	0	0
Cas5	Q5AF91_CANAL	0	0	0
Cas5	Q5A6C2_CANAL-DECOY	0	0	0
Cas5	GRP2_CANAL	0	0	0
Cas5	Q5A3X7_CANAL	0	0	0
Cas5	Q5A7Q8_CANAL	0	0	0
Cas5	Q5AL21_CANAL	0	0	0
Cas5	Q59YC4_CANAL	0	0	0
Cas5	Q5A0N1_CANAL	0	0	0
Cas5	Q59U04_CANAL-DECOY	0	0	0
Cas5	Q5A0B7_CANAL	0	0	0
Cas5	Q5ADT4_CANAL	0	0	0
Cas5	UTR2_CANAL	0	0	0
Cas5	Q5A0I8_CANAL	0	0	0
Cas5	Q5AND0_CANAL	0	0	0
Cas5	Q5ACP2_CANAL	0	0	0
Cas5	FEN1_CANAL	0	0	0
Cas5	Q59N40_CANAL	0	0	0
Cas5	PMM_CANAL	0	0	0
Cas5	Q59PM9_CANAL	0	0	0
Cas5	Q5AAL5_CANAL	0	0	0
Cas5	Q59L90_CANAL	0	0	0
Cas5	Q5AL09_CANAL	0	0	0
Cas5	Q59UI5_CANAL	0	0	0
Cas5	Q59P08_CANAL	0	0	0
Cas5	Q5AFE4_CANAL	0	0	0
Cas5	Q5AAM4_CANAL	0	0	0
Cas5	Q59VH9_CANAL	0	0	0
Cas5	Q5A421_CANAL	0	0	0
Cas5	Q5AGE3_CANAL	0	0	0
Cas5	Q5ALM2_CANAL-DECOY	0	0	0
Cas5	Q5AHD3_CANAL	0	0	0
Cas5	Q59VG1_CANAL	0	0	0
Cas5	Q59U44_CANAL	0	0	0
Cas5	Q5AMJ8_CANAL	0	0	0
Cas5	EIF3A_CANAL	0	0	0
Cas5	Q5A3Y7_CANAL	0	0	0
Cas5	Q59Z43_CANAL	0	0	0
Cas5	Q59T50_CANAL	0	0	0
Cas5	Q5A789_CANAL	0	0	0
Cas5	SLD2_CANAL-DECOY	0	0	0
Cas5	Q59X93_CANAL	0	0	0
Cas5	Q5AKV3_CANAL	0	0	0
Cas5	Q59SM8_CANAL	0	0	0
Cas5	Q5A0N3_CANAL	0	0	0
Cas5	Q59Y54_CANAL [3]	0	0	0
Cas5	Q59Z64_CANAL	0	0	0
Cas5	Q5A5R9_CANAL	0	0	0
Cas5	Q59ZG6_CANAL	0	0	0
Cas5	Q59TY0_CANAL	0	0	0
Cas5	Q5ALR2_CANAL	0	0	0
Cas5	Q5AB80_CANAL-DECOY	0	0	0
Cas5	HSP21_CANAL	0	0	0
Cas5	Q59R27_CANAL	0	0	0
Cas5	CHS7_CANAL	0	0	0
Cas5	Q5AGV6_CANAL	0	0	0
Cas5	Q59RL3_CANAL	0	0	0
Cas5	Q5ACG6_CANAL	0	0	0
Cas5	Q5A7Q9_CANAL	0	0	0
Cas5	Q59WK3_CANAL	0	0	0
Cas5	Q5A693_CANAL	0	0	0
Cas5	Q5AK06_CANAL	0	0	0
Cas5	Q59QQ1_CANAL	0	0	0
Cas5	Q59Z36_CANAL-DECOY	0	0	0
Cas5	Q5AJC9_CANAL	0	0	0
Cas5	Q5A2L3_CANAL	0	0	0
Cas5	Q59MF7_CANAL [2]	0	0	0
Cas5	Q59P60_CANAL	0	0	0
Cas5	Q5A955_CANAL	0	0	0
Cas5	Q5AJB1_CANAL	0	0	0
Cas5	Q59WS6_CANAL	0	0	0
Cas5	Q5A2J2_CANAL	0	0	0
Cas5	Q5A698_CANAL	0	0	0
Cas5	Q59US3_CANAL	0	0	0
Cas5	Q5AI46_CANAL	0	0	0
Cas5	Q5ADU2_CANAL	0	0	0
Cas5	PESC_CANAL	0	0	0
Cas5	CCPR_CANAL	0	0	0
Cas5	Q59VN8_CANAL	0	0	0
Cas5	Q59XN2_CANAL	0	0	0
Cas5	Q59WS7_CANAL	0	0	0
Cas5	Q5AJG7_CANAL	0	0	0
Cas5	AROG_CANAL	0	0	0
Cas5	Q59WC5_CANAL	0	0	0
Cas5	Q5ADW7_CANAL	0	0	0
Cas5	Q5A6B1_CANAL	0	0	0
Cas5	NSA2_CANAL	0	0	0
Cas5	Q5AD74_CANAL	0	0	0
Cas5	Q5AAH5_CANAL	0	0	0
Cas5	Q5AEB8_CANAL	0	0	0
Cas5	Q5A6N6_CANAL	0	0	0
Cas5	DUG1_CANAL	0	0	0
Cas5	DOHH_CANAL	0	0	0
Cas5	Q59SK9_CANAL	0	0	0
Cas5	Q5AC33_CANAL	0	0	0
Cas5	Q59UC5_CANAL	0	0	0
Cas5	Q5AI00_CANAL	0	0	0
Cas5	Q5A9D9_CANAL	0	0	0
Cas5	Q59VX5_CANAL	0	0	0
Cas5	Q5AMN0_CANAL	0	0	0
Cas5	Q5AF83_CANAL-DECOY	0	0	0
Cas5	Q5ANB5_CANAL	0	0	0
Cas5	Q5A5B3_CANAL	0	0	0
Cas5	Q59ZS7_CANAL	0	0	0
Cas5	Q59U83_CANAL	0	0	0
Cas5	Q5AMJ6_CANAL	0	0	0
Cas5	Q59WG0_CANAL	0	0	0
Cas5	Q5A0X0_CANAL	0	0	0
Cas5	Q5A0E3_CANAL	0	0	0
Cas5	Q59R60_CANAL	0	0	0
Cas5	MDHC_CANAL	0	0	0
Cas5	Q5AMT2_CANAL	0	0	0
Cas5	Q59PG8_CANAL	0	0	0
Cas5	Q5AJY2_CANAL	0	0	0
Cas5	Q59MR4_CANAL	0	0	0
Cas5	Q5A9Z5_CANAL	0	0	0
Cas5	Q59PJ4_CANAL	0	0	0
Cas5	NUF2_CANAL	0	0	0
Cas5	Q5ALM0_CANAL	0	0	0
Cas5	Q5AMH8_CANAL	0	0	0
Cas5	Q59RL4_CANAL	0	0	0
Cas5	Q59SD0_CANAL	0	0	0
Cas5	Q5ABA5_CANAL	0	0	0
Cas5	Q5AAI1_CANAL	0	0	0
Cas5	HIR1_CANAL	0	0	0
Cas5	Q59Z12_CANAL	0	0	0
Cas5	MET3_CANAL	0	0	0
Cas5	Q5AHI0_CANAL	0	0	0
Cas5	Q5A673_CANAL	0	0	0
Cas5	Q5A2A5_CANAL	0	0	0
Cas5	Q5AK17_CANAL	0	0	0
Cas5	Q5AJH4_CANAL	0	0	0
Cas5	Q59SI6_CANAL	0	0	0
Cas5	Q5A0H9_CANAL	0	0	0
Cas5	Q5A0L0_CANAL	0	0	0
Cas5	TMEDA_CANAL	0	0	0
Cas5	Q5A2U5_CANAL	0	0	0
Cas5	Q5AI20_CANAL	0	0	0
Cas5	Q5A376_CANAL	0	0	0
Cas5	Q5ACX2_CANAL	0	0	0
Cas5	Q5ABB4_CANAL	0	0	0
Cas5	IHD1_CANAL	0	0	0
Cas5	Q59RG9_CANAL	0	0	0
Cas5	Q5ADR6_CANAL	0	0	0
Cas5	IWS1_CANAL	0	0	0
Cas5	Q5ABD5_CANAL	0	0	0
Cas5	Q5AK79_CANAL	0	0	0
Cas5	Q59Z94_CANAL	0	0	0
Cas5	Q5ADP4_CANAL	0	0	0
Cas5	Q59ZD7_CANAL	0	0	0
Cas5	Q5A2X3_CANAL	0	0	0
Cas5	Q5A1A2_CANAL	0	0	0
Cas5	Q5APK6_CANAL	0	0	0
Cas5	Q5AK86_CANAL	0	0	0
Cas5	Q59TM6_CANAL-DECOY	0	0	0
Cas5	Q5AC25_CANAL	0	0	0
Cas5	Q5A3J2_CANAL	0	0	0
Cas5	Q5AIA6_CANAL	0	0	0
Cas5	Q5A5S6_CANAL	0	0	0
Cas5	Q5AF88_CANAL	0	0	0
Cas5	ETT1_CANAL	0	0	0
Cas5	Q59YE8_CANAL	0	0	0
Cas5	Q59PR7_CANAL	0	0	0
Cas5	Q5A7S2_CANAL	0	0	0
Cas5	Q5A0L8_CANAL	0	0	0
Cas5	Q5AED2_CANAL	0	0	0
Cas5	Q5AJY7_CANAL	0	0	0
Cas5	TPS1_CANAL	0	0	0
Cas5	SEC31_CANAL	0	0	0
Cas5	Q59UG8_CANAL	0	0	0
Cas5	Q5AFE9_CANAL	0	0	0
Cas5	Q5ACQ1_CANAL	0	0	0
Cas5	Q5ADN1_CANAL	0	0	0
Cas5	Q59VG6_CANAL	0	0	0
Cas5	Q5A7A0_CANAL	0	0	0
Cas5	Q5A4F7_CANAL-DECOY	0	0	0
Cas5	ROK1_CANAL	0	0	0
Cas5	Q59T94_CANAL	0	0	0
Cas5	Q5AAL1_CANAL	0	0	0
Cas5	Q5A111_CANAL	0	0	0
Cas5	Q5AB98_CANAL	0	0	0
Cas5	Q59P52_CANAL	0	0	0
Cas5	Q5A8Z9_CANAL	0	0	0
Cas5	Q5A6S2_CANAL	0	0	0
Cas5	Q5APK9_CANAL	0	0	0
Cas5	Q5AF70_CANAL-DECOY	0	0	0
Cas5	Q5AC00_CANAL	0	0	0
Cas5	Q59PH1_CANAL	0	0	0
Cas5	Q59YX6_CANAL	0	0	0
Cas5	Q5A4L3_CANAL	0	0	0
Cas5	Q5AK53_CANAL	0	0	0
Cas5	Q59PJ4_CANAL [2]	0	0	0
Cas5	FCJ1_CANAL	0	0	0
Cas5	Q5AH07_CANAL	0	0	0
Cas5	Q5A4F6_CANAL	0	0	0
Cas5	Q59WF0_CANAL	0	0	0
Cas5	KYNU_CANAL-DECOY	0	0	0
Cas5	Q5AF37_CANAL	0	0	0
Cas5	Q59U19_CANAL	0	0	0
Cas5	CWC26_CANAL	0	0	0
Cas5	Q5ACQ0_CANAL	0	0	0
Cas5	Q5ADA2_CANAL	0	0	0
Cas5	Q5A5A0_CANAL	0	0	0
Cas5	Q59K48_CANAL	0	0	0
Cas5	Q5A476_CANAL	0	0	0
Cas5	Q5ANE3_CANAL	0	0	0
Cas5	KHSE_CANAL	0	0	0
Cas5	CATA_CANAL	0	0	0
Cas5	Q5AFA8_CANAL	0	0	0
Cas5	PPID_CANAL	0	0	0
Cas5	Q5A202_CANAL	0	0	0
Cas5	Q5AFP9_CANAL	0	0	0
Cas5	Q5ADR2_CANAL	0	0	0
Cas5	RMD9_CANAL	0	0	0
Cas5	Q59VG1_CANAL [2]	0	0	0
Cas5	Q5A6Q3_CANAL	0	0	0
Cas5	TIM8_CANAL	0	0	0
Cas5	Q59TV6_CANAL-DECOY	0	0	0
Cas5	Q59ZG0_CANAL	0	0	0
Cas5	SUV3_CANAL-DECOY	0	0	0
Cas5	Q5A1Q0_CANAL	0	0	0
Cas5	Q5AK15_CANAL	0	0	0
Cas5	DHH1_CANAL	0	0	0
Cas5	DBP9_CANAL	0	0	0
Cas5	Q5A0D5_CANAL	0	0	0
Cas5	Q5A678_CANAL	0	0	0
Cas5	Q5A683_CANAL	0	0	0
Cas5	Q59P48_CANAL	0	0	0
Cas5	Q5ALQ9_CANAL	0	0	0
Cas5	SYSC_CANAL	0	0	0
Cas5	3DHQ_CANAL	0	0	0
Cas5	Q59U65_CANAL	0	0	0
Cas5	Q59R18_CANAL	0	0	0
Cas5	MNT1_CANAL	0	0	0
Cas5	Q5A6P2_CANAL	0	0	0
Cas5	Q5AI93_CANAL	0	0	0
Cas5	METE_CANAL	0	0	0
Cas5	Q5A8H1_CANAL	0	0	0
Cas5	Q59LC3_CANAL	0	0	0
Cas5	Q59VN5_CANAL	0	0	0
Cas5	Q59N38_CANAL	0	0	0
Cas5	Q59TY1_CANAL	0	0	0
Cas5	Q59T95_CANAL	0	0	0
Cas5	Q5AAK5_CANAL	0	0	0
Cas5	Q5AHG8_CANAL	0	0	0
Cas5	Q5AMP6_CANAL	0	0	0
Cas5	Q59ZG1_CANAL	0	0	0
Cas5	Q5A968_CANAL	0	0	0
Cas5	DBP5_CANAL	0	0	0
Cas5	Q59KP4_CANAL	0	0	0
Cas5	Q5ALM4_CANAL	0	0	0
Cas5	Q59S73_CANAL	0	0	0
Cas5	Q5AGD3_CANAL	0	0	0
Cas5	Q59UT2_CANAL	0	0	0
Cas5	Q5A6A8_CANAL-DECOY	0	0	0
Cas5	Q59Z35_CANAL	0	0	0
Cas5	Q59SE8_CANAL	0	0	0
Cas5	Q5AK46_CANAL	0	0	0
Cas5	MPI_CANAL	0	0	0
Cas5	Q59UE4_CANAL	0	0	0
Cas5	Q59Z33_CANAL	0	0	0
Cas5	Q59QD3_CANAL	0	0	0
Cas5	Q59US5_CANAL	0	0	0
Cas5	Q5AD48_CANAL	0	0	0
Cas5	Q5AEC9_CANAL	0	0	0
Cas5	Q5AI49_CANAL	0	0	0
Cas5	Q5A8H6_CANAL	0	0	0
Cas5	Q59US2_CANAL	0	0	0
Cas5	Q5A6Q6_CANAL	0	0	0
Cas5	GUAA_CANAL	0	0	0
Cas5	Q59YH4_CANAL	0	0	0
Cas5	Q59NK8_CANAL	0	0	0
Cas5	Q5API7_CANAL	0	0	0
Cas5	Q5A0H7_CANAL	0	0	0
Cas5	Q59VH4_CANAL	0	0	0
Cas5	Q5A3X4_CANAL	0	0	0
Cas5	Q59R20_CANAL	0	0	0
Cas5	Q5ABT0_CANAL	0	0	0
Cas5	Q5AMG3_CANAL	0	0	0
Cas5	Q5A8Y6_CANAL	0	0	0
Cas5	Q5A3L0_CANAL	0	0	0
Cas5	Q59U85_CANAL	0	0	0
Cas5	YTM1_CANAL	0	0	0
Cas5	Q59TC4_CANAL	0	0	0
Cas5	APTH1_CANAL	0	0	0
Cas5	Q5A0A8_CANAL	0	0	0
Cas5	Q5AJV7_CANAL	0	0	0
Cas5	Q5A4L1_CANAL	0	0	0
Cas5	Q5AF98_CANAL	0	0	0
Cas5	Q59V85_CANAL	0	0	0
Cas5	CDC10_CANAL	0	0	0
Cas5	Q59WW7_CANAL	0	0	0
Cas5	SEC4_CANAL	0	0	0
Cas5	Q5AF81_CANAL	0	0	0
Cas5	ERG6_CANAL	0	0	0
Cas5	Q5A943_CANAL	0	0	0
Cas5	Q59SM7_CANAL	0	0	0
Cas5	SEC13_CANAL	0	0	0
Cas5	Q59VH2_CANAL-DECOY	0	0	0
Cas5	Q5AKX1_CANAL	0	0	0
Cas5	Q59Y56_CANAL	0	0	0
Cas5	Q59WW0_CANAL	0	0	0
Cas5	Q5A410_CANAL	0	0	0
Cas5	Q59WC2_CANAL	0	0	0
Cas5	Q59JP5_CANAL-DECOY	0	0	0
Cas5	Q5AFP7_CANAL	0	0	0
Cas5	Q59ZV7_CANAL	0	0	0
Cas5	Q59XU9_CANAL	0	0	0
Cas5	Q5A876_CANAL	0	0	0
Cas5	Q59Z56_CANAL-DECOY	0	0	0
Cas5	Q5A1B0_CANAL-DECOY	0	0	0
Cas5	CP51_CANAL	0	0	0
Cas5	Q59V82_CANAL	0	0	0
Cas5	SEC14_CANAL	0	0	0
Cas5	Q5AH96_CANAL	0	0	0
Cas5	Q5A4Y2_CANAL-DECOY	0	0	0
Cas5	Q59UD8_CANAL	0	0	0
Cas5	Q59QD2_CANAL	0	0	0
Cas5	Q5ABV9_CANAL [2]	0	0	0
Cas5	Q5AHZ9_CANAL	0	0	0
Cas5	Q5AK16_CANAL	0	0	0
Cas5	Q59X74_CANAL	0	0	0
Cas5	Q5A7M1_CANAL	0	0	0
Cas5	Q5ABV9_CANAL	0	0	0
Cas5	Q59L15_CANAL	0	0	0
Cas5	SHE3_CANAL	0	0	0
Cas5	Q5A1V4_CANAL	0	0	0
Cas5	Q59LB0_CANAL	0	0	0
Cas5	Q59JP8_CANAL-DECOY	0	0	0
Cas5	Q59Y36_CANAL	0	0	0
Cas5	SYA_CANAL	0	0	0
Cas5	Q5A5N0_CANAL	0	0	0
Cas5	RT10_CANAL	0	0	0
Cas5	Q59T35_CANAL	0	0	0
Cas5	Q5A6C2_CANAL	0	0	0
Cas5	Q5A9L8_CANAL	0	0	0
Cas5	Q5AMN7_CANAL	0	0	0
Cas5	Q59X91_CANAL	0	0	0
Cas5	Q59TD8_CANAL	0	0	0
Cas5	Q5AF31_CANAL	0	0	0
Cas5	Q5AFG0_CANAL	0	0	0
Cas5	Q59ZT0_CANAL	0	0	0
Cas5	Q59Z13_CANAL	0	0	0
Cas5	Q5AGF7_CANAL	0	0	0
Cas5	Q5A993_CANAL	0	0	0
Cas5	NFS1_CANAL	0	0	0
Cas5	Q5ACF2_CANAL	0	0	0
Cas5	Q59PR7_CANAL-DECOY	0	0	0
Cas5	Q5A3Y1_CANAL	0	0	0
Cas5	Q5AHJ9_CANAL	0	0	0
Cas5	Q59SI1_CANAL	0	0	0
Cas5	Q5AKW4_CANAL	0	0	0
Cas5	GET3_CANAL	0	0	0
Cas5	UGP1_CANAL	0	0	0
Cas5	Q5AJA1_CANAL	0	0	0
Cas5	Q59NH3_CANAL	0	0	0
Cas5	HSP7F_CANAL	0	0	0
Cas5	Q59TD5_CANAL	0	0	0
Cas5	Q5ALT0_CANAL	0	0	0
Cas5	Q5AB68_CANAL	0	0	0
Cas5	Q5A2K7_CANAL	0	0	0
Cas5	IMDH_CANAL	0	0	0
Cas5	G1UB69_CANAL	0	0	0
Cas5	Q5ADP7_CANAL	0	0	0
Cas5	Q59VF0_CANAL	0	0	0
Cas5	Q59KX4_CANAL	0	0	0
Cas5	Q5AAF6_CANAL	0	0	0
Cas5	Q59PW1_CANAL	0	0	0
Cas5	Q59T34_CANAL	0	0	0
Cas5	Q5AED0_CANAL	0	0	0
Cas5	Q5AC80_CANAL	0	0	0
Cas5	G1UB64_CANAL	0	0	0
Cas5	Q5ABS0_CANAL	0	0	0
Cas5	Q5A9A4_CANAL	0	0	0
Cas5	Q5ADR8_CANAL-DECOY	0	0	0
Cas5	Q5AIA0_CANAL	0	0	0
Cas5	Q5AH31_CANAL	0	0	0
Cas5	Q5A339_CANAL	0	0	0
Cas5	Q59QT3_CANAL	0	0	0
Cas5	Q59Z50_CANAL	0	0	0
Cas5	Q59KV1_CANAL	0	0	0
Cas5	Q5A4F8_CANAL	0	0	0
Cas5	Q59RC5_CANAL	0	0	0
Cas5	Q5AB90_CANAL	0	0	0
Cas5	EFGM_CANAL	0	0	0
Cas5	Q59YG5_CANAL	0	0	0
Cas5	Q5AAJ1_CANAL	0	0	0
Cas5	Q5A3I9_CANAL	0	0	0
Cas5	Q59RI1_CANAL	0	0	0
Cas5	Q5A3N5_CANAL	0	0	0
Cas5	Q5A6M6_CANAL	0	0	0
Cas5	Q5A1Z1_CANAL	0	0	0
Cas5	Q59ZF9_CANAL	0	0	0
Cas5	Q59MF7_CANAL	0	0	0
Cas5	Q5ALL4_CANAL	0	0	0
Cas5	Q5AFL1_CANAL	0	0	0
Cas5	Q5A6K4_CANAL	0	0	0
Cas5	Q5APN8_CANAL	0	0	0
Cas5	Q5AFC4_CANAL	0	0	0
Cas5	DRS1_CANAL	0	0	0
Cas5	Q5AIB9_CANAL	0	0	0
Cas5	SEC23_CANAL	0	0	0
Cas5	Q5A6L1_CANAL	0	0	0
Cas5	SNU71_CANAL	0	0	0
Cas5	Q59W82_CANAL	0	0	0
Cas5	PMT1_CANAL	0	0	0
Cas5	Q5AF32_CANAL	0	0	0
Cas5	NMT_CANAL	0	0	0
Cas5	Q5AEP1_CANAL	0	0	0
Cas5	Q5AKZ1_CANAL-DECOY	0	0	0
Cas5	Q59PT0_CANAL	0	0	0
Cas5	Q5A3K7_CANAL	0	0	0
Cas5	Q59RM5_CANAL	0	0	0
Cas5	SVF1_CANAL	0	0	0
Cas5	Q59Y54_CANAL	0	0	0
Cas5	Q59ZS8_CANAL	0	0	0
Cas5	Q5AC10_CANAL	0	0	0
Cas5	Q59PQ2_CANAL	0	0	0
Cas5	Q59ZS3_CANAL	0	0	0
Cas5	Q5ABX6_CANAL	0	0	0
Cas5	Q59NK2_CANAL	0	0	0
Cas5	Q5A2U9_CANAL	0	0	0
Cas5	Q59YS9_CANAL	0	0	0
Cas5	Q5A4F0_CANAL	0	0	0
Cas5	Q5A2B7_CANAL	0	0	0
Cas5	TIM50_CANAL	0	0	0
Cas5	Q59LW3_CANAL	0	0	0
Cas5	Q59ZT3_CANAL	0	0	0
Cas5	ERG1_CANAL	0	0	0
Cas5	Q59P14_CANAL	0	0	0
Cas5	Q5AG62_CANAL	0	0	0
Cas5	IPYR_CANAL	0.24	0.22	0
Cas5	SPT16_CANAL	0.28	0.26	0
Cas5	Q5A750_CANAL	0.31	0.29	0
Cas5	Q5AGZ8_CANAL	0.31	0.29	0
Cas5	Q59SN3_CANAL	0.32	0.23	0
Cas5	PMGY_CANAL	0.33	0.3	0
Cas5	Q59M82_CANAL	0.35	0.31	0
Cas5	G6PI_CANAL	0.36	0.29	0
Cas5	HSP90_CANAL	0.38	0.31	0
Cas5	Q5A1B9_CANAL	0.38	0.33	0
Cas5	NOP12_CANAL	0.39	0.32	0
Cas5	Q5A0K5_CANAL	0.4	0.36	0
Cas5	Q59WG3_CANAL	0.41	0.38	0
Cas5	Q5A7M9_CANAL	0.43	0.4	0
Cas5	SAHH_CANAL	0.44	0.32	0
Cas5	Q59QS2_CANAL	0.44	0.36	0
Cas5	Q5A785_CANAL	0.44	0.39	0
Cas5	Q5A2T2_CANAL	0.46	0.42	0
Cas5	Q59ZG5_CANAL	0.48	0.44	0
Cas5	Q59WW5_CANAL	0.5	0.4	0
Cas5	Q5AND6_CANAL	0.5	0.41	0
Cas5	Q5AMK6_CANAL	0.52	0.39	0
Cas5	IF4A_CANAL	0.53	0.39	0
Cas5	Q5A362_CANAL	0.53	0.49	0
Cas5	Q5ABS3_CANAL	0.54	0.49	0
Cas5	Q5AK00_CANAL	0.55	0.44	0
Cas5	Q59SR4_CANAL	0.55	0.48	0
Cas5	Q59WT5_CANAL [2]	0.57	0.46	0
Cas5	Q59WT5_CANAL	0.57	0.46	0
Cas5	EF2_CANAL	0.57	0.49	0
Cas5	Q59W67_CANAL	0.57	0.53	0
Cas5	Q5AP75_CANAL	0.58	0.53	0
Cas5	EIF3C_CANAL	0.6	0.43	0
Cas5	Q5AND9_CANAL	0.6	0.55	0
Cas5	KPYK_CANAL	0.6	0.59	0
Cas5	Q59PA2_CANAL	0.61	0.45	0
Cas5	Q59RJ8_CANAL	0.61	0.55	0
Cas5	Q5AJY4_CANAL	0.61	0.55	0
Cas5	Q5AFH1_CANAL	0.62	0.49	0
Cas5	ENO1_CANAL	0.64	0.3	0
Cas5	Q59TT0_CANAL	0.64	0.54	0
Cas5	TIM9_CANAL	0.64	0.56	0
Cas5	Q59K50_CANAL	0.64	0.59	0
Cas5	Q5AFB3_CANAL	0.64	0.59	0
Cas5	Q5ADM7_CANAL	0.65	0.5	0
Cas5	Q59RA4_CANAL	0.65	0.58	0
Cas5	Q5AAQ5_CANAL	0.65	0.59	0
Cas5	TUP1_CANAL	0.66	0.56	0
Cas5	Q5AK23_CANAL	0.67	0.27	0
Cas5	Q5ACG9_CANAL	0.67	0.47	0
Cas5	Q59RJ3_CANAL	0.67	0.55	0
Cas5	Q5A5F2_CANAL	0.67	0.61	0
Cas5	Q5ADW5_CANAL	0.67	0.62	0
Cas5	Q59LN7_CANAL	0.68	0.46	0
Cas5	ARX1_CANAL	0.68	0.49	0
Cas5	Q5A0M1_CANAL	0.68	0.49	0
Cas5	Q5AEI1_CANAL	0.69	0.63	0
Cas5	HXKB_CANAL	0.7	0.51	0
Cas5	Q59LZ5_CANAL	0.7	0.57	0
Cas5	Q5AFQ6_CANAL	0.7	0.64	0
Cas5	Q5AHY8_CANAL	0.7	0.64	0
Cas5	Q5AGF6_CANAL	0.71	0.47	0
Cas5	Q5A0Z9_CANAL	0.71	0.51	0
Cas5	Q5A4H2_CANAL	0.71	0.61	0
Cas5	Q5AIC3_CANAL	0.71	0.64	0
Cas5	Q59SM9_CANAL	0.71	0.7	0
Cas5	PDC1_CANAL	0.73	0.58	0
Cas5	Q59T44_CANAL	0.73	0.62	0
Cas5	TSA1_CANAL	0.73	0.69	0
Cas5	Q5A017_CANAL	0.74	0.41	0
Cas5	ACON_CANAL	0.74	0.46	0
Cas5	Q5AG68_CANAL	0.74	0.61	0
Cas5	Q5APC1_CANAL	0.75	0.46	0
Cas5	Q5A1E8_CANAL	0.75	0.64	0
Cas5	Q5AAQ8_CANAL	0.75	0.64	0
Cas5	YWP1_CANAL	0.75	0.65	0
Cas5	Q59RP4_CANAL	0.75	0.65	0
Cas5	Q5AB74_CANAL	0.75	0.68	0
Cas5	Q5AFL8_CANAL	0.75	0.68	0
Cas5	MCR1_CANAL	0.75	0.68	0
Cas5	Q59ZI7_CANAL	0.75	0.69	0
Cas5	Q59ZF5_CANAL	0.75	0.69	0
Cas5	Q5AEL7_CANAL	0.75	0.69	0
Cas5	Q5AK50_CANAL	0.75	0.69	0
Cas5	Q5A7A3_CANAL	0.75	0.69	0
Cas5	POB3_CANAL	0.75	0.69	0
Cas5	EF3_CANAL	0.75	0.74	0
Cas5	Q5AEN2_CANAL	0.76	0.63	0
Cas5	Q5A1D2_CANAL	0.76	0.73	0
Cas5	Q5AK02_CANAL	0.78	0.51	0
Cas5	TPIS_CANAL	0.79	0.61	0
Cas5	Q5AKI5_CANAL	0.8	0.47	0
Cas5	Q5AKI5_CANAL [2]	0.8	0.47	0
Cas5	Q5AD44_CANAL [2]	0.81	0.53	0
Cas5	Q5AD44_CANAL	0.81	0.53	0
Cas5	Q59QX3_CANAL [2]	0.81	0.53	0
Cas5	Q5ALV6_CANAL	0.81	0.75	0
Cas5	Q59ZI4_CANAL	0.81	0.8	0
Cas5	Q5ADS5_CANAL	0.82	0.66	0
Cas5	Q59PZ0_CANAL	0.82	0.75	0
Cas5	Q5ACG8_CANAL	0.82	0.75	0
Cas5	Q5ACH8_CANAL	0.82	0.75	0
Cas5	RM51_CANAL	0.82	0.75	0
Cas5	Q5AG43_CANAL	0.83	0.59	0
Cas5	Q5ABC3_CANAL	0.83	0.6	0
Cas5	NHP6_CANAL	0.83	0.71	0
Cas5	Q5A8A4_CANAL [2]	0.84	0.68	0
Cas5	Q5AIA2_CANAL	0.85	0.69	0
Cas5	Q5ADT0_CANAL	0.85	0.69	0
Cas5	Q59LB5_CANAL	0.85	0.69	0
Cas5	Q5AJF7_CANAL	0.85	0.84	0
Cas5	Q5AJ93_CANAL	0.85	0.84	0
Cas5	Q5AKX0_CANAL	0.86	0.84	0
Cas5	Q5A2W1_CANAL	0.88	0.75	0
Cas5	Q59VR2_CANAL-DECOY	0.88	0.75	0
Cas5	Q59S96_CANAL	0.88	0.84	0
Cas5	HSP60_CANAL	0.9	0.61	0
Cas5	KAD6_CANAL	0.9	0.81	0
Cas5	Q5A5Q8_CANAL	0.9	0.81	0
Cas5	Q59PX0_CANAL	0.9	0.81	0
Cas5	Q5A691_CANAL	0.9	0.82	0
Cas5	Q5A6S0_CANAL	0.9	0.82	0
Cas5	Q59RQ4_CANAL	0.9	0.82	0
Cas5	Q5A9E5_CANAL	0.9	0.82	0
Cas5	ACN9_CANAL	0.9	0.82	0
Cas5	Q59LA1_CANAL	0.9	0.82	0
Cas5	Q5AL30_CANAL	0.9	0.82	0
Cas5	Q5ACX6_CANAL	0.9	0.82	0
Cas5	Q5ANC2_CANAL	0.9	0.9	0
Cas5	Q5A0A6_CANAL	0.9	0.9	0
Cas5	PPIA_CANAL	0.92	0.61	0
Cas5	Q5ANJ7_CANAL	0.92	0.84	0
Cas5	Q5A4I4_CANAL	0.93	0.85	0
Cas5	Q5AFQ7_CANAL	0.93	0.9	0
Cas5	EF1A1_CANAL [2]	0.93	0.9	0
Cas5	Q59M73_CANAL	0.93	0.92	0
Cas5	Q59S65_CANAL [2]	0.94	0.88	0
Cas5	EF1A2_CANAL	0.94	0.9	0
Cas5	Q5A092_CANAL	0.95	0.81	0
Cas5	Q59NE6_CANAL	0.95	0.82	0
Cas5	Q5AFJ3_CANAL	0.95	0.82	0
Cas5	EF1A1_CANAL	0.95	0.91	0
Cas5	Q59ZV3_CANAL	0.95	0.93	0
Cas5	Q5A0V9_CANAL	0.95	0.94	0
Cas5	Q5AGZ7_CANAL	0.96	0.79	0
Cas5	Q5AJD4_CANAL	0.96	0.79	0
Cas5	Q5AFF1_CANAL	0.96	0.85	0
Cas5	Q5APD4_CANAL	0.96	0.86	0
Cas5	Q59S65_CANAL	0.96	0.89	0
Cas5	IF5A_CANAL	0.96	0.95	0
Cas5	Q5A6R1_CANAL	0.97	0.94	0
Cas5	Q5ALP3_CANAL	0.98	0.66	0
Cas5	Q5A7K0_CANAL	0.98	0.94	0
Cas5	KAD2_CANAL	0.99	0.71	0
Cas5	Q59LS1_CANAL	0.99	0.78	0
Cas5	Q5AJ83_CANAL	0.99	0.8	0
Cas5	PHR2_CANAL	0.99	0.91	0
Cas5	Q5ABD6_CANAL	0.99	0.91	0
Cas5	Q5A4K8_CANAL	0.99	0.91	0
Cas5	Q59YL2_CANAL	0.99	0.91	0
Cas5	Q5A8K1_CANAL	0.99	0.91	0
Cas5	Q5AMT7_CANAL	0.99	0.94	0
Cas5	PGK_CANAL	1	0.52	0
Cas5	Q5A8L4_CANAL	1	0.91	0
Cas5	Q5A5S3_CANAL	1	0.91	0
Cas5	Q59SI8_CANAL	1	0.91	0
Cas5	RSSA_CANAL	1	0.91	0
Cas5	Q5A8P2_CANAL	1	0.91	0
Cas5	UTP10_CANAL	1	0.91	0
Cas5	PAP_CANAL	1	0.91	0
Cas5	RS3A_CANAL	1	0.96	0
Cas5	Q5A5V6_CANAL	1.01	0.94	0
Cas5	Q5A4Y4_CANAL	1.01	0.99	0
Cas5	ALF_CANAL	1.02	0.54	0
Cas5	Q59VF6_CANAL	1.02	0.88	0
Cas5	Q5APD9_CANAL	1.02	0.88	0
Cas5	MPG1_CANAL	1.02	0.97	0
Cas5	Q5AAR2_CANAL	1.02	0.99	0
Cas5	Q59WC0_CANAL	1.03	0.93	0
Cas5	Q59LB7_CANAL	1.03	0.93	0
Cas5	Q5A798_CANAL	1.04	0.89	0
Cas5	Q59NF9_CANAL	1.04	0.9	0
Cas5	Q59SE5_CANAL	1.04	1	0
Cas5	Q59ZJ2_CANAL	1.05	0.85	0
Cas5	COX2_CANAL	1.05	0.96	0
Cas5	Q5AIC4_CANAL	1.05	0.97	0
Cas5	PABP_CANAL	1.06	0.63	0
Cas5	Q59N42_CANAL	1.06	0.77	0
Cas5	Q59RD8_CANAL	1.06	1.05	0
Cas5	Q5A0H3_CANAL	1.08	0.87	0
Cas5	Q5AJD3_CANAL	1.08	0.92	0
Cas5	Q59NZ2_CANAL	1.08	0.98	0
Cas5	DED1_CANAL [2]	1.08	1.04	0
Cas5	Q5AML4_CANAL	1.08	1.04	0
Cas5	DED1_CANAL	1.08	1.04	0
Cas5	RS22_CANAL	1.08	1.05	0
Cas5	FKBP3_CANAL	1.08	1.05	0
Cas5	Q5ABF6_CANAL	1.08	1.05	0
Cas5	Q59UR7_CANAL	1.08	1.06	0
Cas5	Q5A944_CANAL	1.09	0.74	0
Cas5	Q5ANF5_CANAL	1.09	1.01	0
Cas5	Q59RQ6_CANAL	1.09	1.03	0
Cas5	Q5A652_CANAL	1.1	0.97	0
Cas5	DBP2_CANAL	1.1	1.04	0
Cas5	TCTP_CANAL	1.11	1	0
Cas5	Q5AAL2_CANAL	1.11	1	0
Cas5	Q5A6S7_CANAL	1.11	1.01	0
Cas5	Q59US1_CANAL	1.11	1.01	0
Cas5	EIF3J_CANAL	1.11	1.01	0
Cas5	Q5AJA9_CANAL	1.11	1.01	0
Cas5	Q59V63_CANAL	1.11	1.01	0
Cas5	Q5A357_CANAL	1.11	1.01	0
Cas5	BCP1_CANAL	1.11	1.01	0
Cas5	Q59W78_CANAL	1.11	1.01	0
Cas5	Q5AI30_CANAL	1.11	1.01	0
Cas5	Q59TE0_CANAL	1.11	1.07	0
Cas5	Q5AA01_CANAL	1.12	0.76	0
Cas5	Q59PU1_CANAL	1.12	1.01	0
Cas5	Q5AIB8_CANAL	1.12	1.08	0
Cas5	Q5AD54_CANAL	1.13	0.68	0
Cas5	Q59KV8_CANAL	1.13	0.83	0
Cas5	Q5AFQ4_CANAL	1.13	1.11	0
Cas5	Q5A5P8_CANAL	1.13	1.11	0
Cas5	BRE1_CANAL	1.14	0.59	0
Cas5	Q5A4P6_CANAL	1.14	0.82	0
Cas5	Q5AKW2_CANAL	1.14	0.93	0
Cas5	Q5AG96_CANAL	1.15	0.99	0
Cas5	Q59W54_CANAL	1.15	1.08	0
Cas5	DCW1_CANAL	1.16	0.99	0
Cas5	Q59TB4_CANAL	1.16	1	0
Cas5	Q59N00_CANAL	1.16	1.12	0
Cas5	Q59ZX4_CANAL	1.16	1.15	0
Cas5	Q5A6A1_CANAL	1.16	1.15	0
Cas5	Q59KU5_CANAL	1.17	0.88	0
Cas5	Q5AKV6_CANAL	1.17	1.15	0
Cas5	Q5AHY9_CANAL	1.18	0.96	0
Cas5	Q59P91_CANAL	1.19	0.96	0
Cas5	Q5A7T3_CANAL	1.19	1.1	0
Cas5	Q5A397_CANAL	1.19	1.13	0
Cas5	Q5A4L8_CANAL	1.2	1.19	0
Cas5	Q5A6Z6_CANAL	1.21	0.8	0
Cas5	IF6_CANAL	1.21	1.09	0
Cas5	Q5A297_CANAL	1.21	1.09	0
Cas5	Q5ANK8_CANAL	1.21	1.09	0
Cas5	Q5A460_CANAL	1.21	1.09	0
Cas5	Q5A900_CANAL	1.22	1.12	0
Cas5	Q5ANA1_CANAL	1.23	1.16	0
Cas5	Q5ANA1_CANAL [2]	1.23	1.17	0
Cas5	Q5A5F6_CANAL	1.23	1.2	0
Cas5	RL10A_CANAL	1.25	1.21	0
Cas5	Q5AAS4_CANAL	1.26	1.04	0
Cas5	Q59Z25_CANAL	1.26	1.04	0
Cas5	Q5ABY1_CANAL	1.26	1.04	0
Cas5	Q5A6B3_CANAL	1.26	1.15	0
Cas5	Q5ALJ0_CANAL	1.26	1.15	0
Cas5	Q5AD24_CANAL	1.26	1.15	0
Cas5	Q59YD0_CANAL	1.26	1.15	0
Cas5	Q5ADP3_CANAL	1.26	1.15	0
Cas5	Q5A4Z9_CANAL	1.26	1.15	0
Cas5	Q5A389_CANAL	1.26	1.16	0
Cas5	Q59Z66_CANAL	1.26	1.16	0
Cas5	Q59YH5_CANAL	1.28	0.81	0
Cas5	Q5ANF2_CANAL	1.28	1	0
Cas5	Q5A5F5_CANAL	1.28	1.05	0
Cas5	Q5AL40_CANAL	1.28	1.16	0
Cas5	COX23_CANAL	1.29	0.75	0
Cas5	Q5ACS1_CANAL	1.29	1.11	0
Cas5	VDAC_CANAL	1.29	1.28	0
Cas5	Q5A109_CANAL	1.3	1.01	0
Cas5	Q59WJ0_CANAL	1.3	1.23	0
Cas5	GBLP_CANAL	1.3	1.25	0
Cas5	Q5ABS1_CANAL	1.31	0.89	0
Cas5	Q5AGU9_CANAL	1.31	0.93	0
Cas5	Q59ST2_CANAL	1.31	1.06	0
Cas5	Q5A995_CANAL	1.31	1.06	0
Cas5	Q5A401_CANAL	1.32	1.19	0
Cas5	Q5AGB9_CANAL	1.33	0.96	0
Cas5	Q59PR9_CANAL	1.33	1.01	0
Cas5	Q5A4Z5_CANAL	1.33	1.2	0
Cas5	Q59YJ9_CANAL	1.33	1.2	0
Cas5	Q59P13_CANAL	1.34	0.97	0
Cas5	Q59SE6_CANAL	1.35	1.17	0
Cas5	Q5A5B9_CANAL	1.35	1.17	0
Cas5	Q5A782_CANAL	1.36	1.09	0
Cas5	Q5ALV9_CANAL	1.36	1.31	0
Cas5	Q59YM0_CANAL [2]	1.37	0.95	0
Cas5	Q5ADR3_CANAL	1.37	1.03	0
Cas5	Q5APH1_CANAL	1.37	1.12	0
Cas5	Q5ACN1_CANAL	1.38	1	0
Cas5	Q5ALV5_CANAL	1.38	1.33	0
Cas5	Q5A4W7_CANAL	1.4	1.16	0
Cas5	CYC_CANAL	1.4	1.27	0
Cas5	ALB1_CANAL	1.41	1.16	0
Cas5	Q5ACX4_CANAL	1.41	1.16	0
Cas5	Q5AF44_CANAL	1.41	1.28	0
Cas5	Q59UQ4_CANAL	1.44	1.18	0
Cas5	HSP72_CANAL [2]	1.44	1.41	0
Cas5	Q59YM0_CANAL	1.46	0.88	0
Cas5	Q59QZ9_CANAL	1.46	0.96	0
Cas5	QCR2_CANAL	1.46	1.26	0
Cas5	Q5AF72_CANAL	1.46	1.34	0
Cas5	Q5AGI7_CANAL-DECOY	1.46	1.34	0
Cas5	Q5ADM3_CANAL-DECOY	1.46	1.34	0
Cas5	Q5ALM5_CANAL	1.46	1.34	0
Cas5	HEM1_CANAL	1.46	1.34	0
Cas5	Q5AK07_CANAL-DECOY	1.46	1.34	0
Cas5	Q59TY8_CANAL-DECOY	1.46	1.34	0
Cas5	Q59UE8_CANAL	1.46	1.34	0
Cas5	Q5AB94_CANAL	1.46	1.34	0
Cas5	LIP10_CANAL	1.46	1.34	0
Cas5	Q5A0I6_CANAL	1.46	1.34	0
Cas5	Q59T43_CANAL	1.46	1.34	0
Cas5	Q5A430_CANAL	1.46	1.34	0
Cas5	Q5A777_CANAL	1.46	1.34	0
Cas5	EAF6_CANAL	1.46	1.34	0
Cas5	Q5A480_CANAL	1.46	1.34	0
Cas5	Q59L34_CANAL-DECOY	1.46	1.34	0
Cas5	Q5ALX7_CANAL	1.46	1.34	0
Cas5	Q5ALL2_CANAL-DECOY	1.46	1.34	0
Cas5	Q5A187_CANAL-DECOY	1.46	1.34	0
Cas5	Q5AF56_CANAL-DECOY	1.46	1.34	0
Cas5	Q59M47_CANAL-DECOY	1.46	1.34	0
Cas5	Q5AGW7_CANAL-DECOY	1.46	1.34	0
Cas5	Q5A9E7_CANAL	1.46	1.34	0
Cas5	Q5A5C8_CANAL	1.46	1.34	0
Cas5	Q5A517_CANAL	1.46	1.34	0
Cas5	Q5AHJ8_CANAL	1.46	1.34	0
Cas5	Q5A0C3_CANAL	1.46	1.34	0
Cas5	Q5AIP8_CANAL-DECOY	1.46	1.34	0
Cas5	Q59KA9_CANAL	1.46	1.34	0
Cas5	Q5ANF9_CANAL-DECOY	1.46	1.34	0
Cas5	Q5A1R9_CANAL-DECOY	1.46	1.34	0
Cas5	Q59XW4_CANAL	1.46	1.34	0
Cas5	Q59T47_CANAL	1.46	1.34	0
Cas5	Q59TM2_CANAL-DECOY	1.46	1.34	0
Cas5	Q5A8X4_CANAL	1.46	1.34	0
Cas5	Q5AMF4_CANAL	1.46	1.34	0
Cas5	Q59RL5_CANAL	1.46	1.34	0
Cas5	HSM3_CANAL	1.46	1.34	0
Cas5	Q59VF3_CANAL	1.46	1.34	0
Cas5	Q5A115_CANAL-DECOY	1.46	1.34	0
Cas5	Q5AGI7_CANAL	1.46	1.34	0
Cas5	Q5A6K5_CANAL	1.46	1.34	0
Cas5	Q59YT5_CANAL	1.46	1.34	0
Cas5	Q5AMM6_CANAL	1.46	1.34	0
Cas5	Q59XU7_CANAL	1.46	1.34	0
Cas5	Q59NQ4_CANAL-DECOY	1.46	1.34	0
Cas5	Q5APF7_CANAL	1.46	1.34	0
Cas5	Q5A212_CANAL	1.46	1.34	0
Cas5	Q59P00_CANAL	1.46	1.34	0
Cas5	H31_CANAL	1.46	1.34	0
Cas5	Q5A4I2_CANAL	1.46	1.34	0
Cas5	Q5A6M9_CANAL	1.46	1.34	0
Cas5	Q5A228_CANAL	1.46	1.34	0
Cas5	Q59LW8_CANAL-DECOY	1.46	1.34	0
Cas5	Q59LA6_CANAL	1.46	1.34	0
Cas5	Q5A892_CANAL	1.46	1.34	0
Cas5	Q5AMQ5_CANAL	1.46	1.34	0
Cas5	Q5AJC7_CANAL	1.46	1.34	0
Cas5	Q59RT7_CANAL-DECOY	1.46	1.34	0
Cas5	Q5AFE1_CANAL-DECOY	1.46	1.34	0
Cas5	Q59KN7_CANAL-DECOY	1.46	1.34	0
Cas5	Q5APM9_CANAL	1.46	1.34	0
Cas5	Q59U14_CANAL	1.46	1.34	0
Cas5	BCR1_CANAL	1.46	1.34	0
Cas5	Q5AMH6_CANAL-DECOY	1.46	1.34	0
Cas5	Q59P06_CANAL-DECOY	1.46	1.34	0
Cas5	Q5AKX6_CANAL	1.46	1.34	0
Cas5	Q5A201_CANAL	1.46	1.34	0
Cas5	Q59VR1_CANAL	1.46	1.34	0
Cas5	ARO1_CANAL-DECOY	1.46	1.34	0
Cas5	Q5AED1_CANAL	1.46	1.34	0
Cas5	DBP7_CANAL	1.46	1.34	0
Cas5	Q59XL1_CANAL	1.46	1.34	0
Cas5	EFG1_CANAL	1.46	1.34	0
Cas5	Q5AMG0_CANAL	1.46	1.34	0
Cas5	Q5A4X4_CANAL-DECOY	1.46	1.34	0
Cas5	Q5AHA0_CANAL-DECOY	1.46	1.34	0
Cas5	Q5AEY7_CANAL	1.46	1.34	0
Cas5	Q59ML2_CANAL	1.46	1.34	0
Cas5	Q5A7T0_CANAL-DECOY	1.46	1.34	0
Cas5	Q5ADM8_CANAL-DECOY	1.46	1.34	0
Cas5	Q5AI99_CANAL	1.47	1.19	0
Cas5	Q5A1M1_CANAL	1.47	1.26	0
Cas5	Q59YF0_CANAL	1.47	1.26	0
Cas5	Q59QT4_CANAL	1.47	1.27	0
Cas5	Q5AH35_CANAL	1.47	1.32	0
Cas5	Q5ACD5_CANAL	1.47	1.33	0
Cas5	Q5A5P7_CANAL	1.47	1.33	0
Cas5	H2B1_CANAL	1.47	1.45	0
Cas5	Q5ANH6_CANAL	1.49	1.47	0
Cas5	Q5AAU7_CANAL	1.5	1.16	0
Cas5	Q59RQ8_CANAL	1.54	1.08	0
Cas5	Q59RA9_CANAL	1.54	1.13	0
Cas5	RLA1_CANAL	1.55	1.53	0
Cas5	EIF3G_CANAL	1.56	1.13	0
Cas5	Q59LQ6_CANAL	1.56	1.19	0
Cas5	Q59QC1_CANAL	1.57	1.54	0
Cas5	Q5AP79_CANAL	1.58	1.53	0
Cas5	Q59NZ1_CANAL	1.59	1.29	0
Cas5	Q59U49_CANAL	1.59	1.29	0
Cas5	Q5A4H1_CANAL	1.59	1.3	0
Cas5	Q5ANH5_CANAL	1.59	1.3	0
Cas5	Q5AJG3_CANAL	1.59	1.46	0
Cas5	Q5A0D3_CANAL	1.6	0.94	0
Cas5	RUVB1_CANAL	1.6	1.29	0
Cas5	Q59ZT6_CANAL	1.6	1.32	0
Cas5	Q5AI68_CANAL	1.6	1.32	0
Cas5	TIM13_CANAL	1.6	1.32	0
Cas5	Q5AJ98_CANAL	1.6	1.32	0
Cas5	Q5A7K1_CANAL	1.61	1.39	0
Cas5	Q59TC7_CANAL	1.62	1.53	0
Cas5	Q5AMQ2_CANAL	1.63	1.59	0
Cas5	Q5ADQ6_CANAL	1.65	1.6	0
Cas5	NOP16_CANAL	1.66	1.12	0
Cas5	CDC11_CANAL	1.66	1.34	0
Cas5	H2A1_CANAL	1.67	1.1	0
Cas5	Q5A7T2_CANAL	1.67	1.25	0
Cas5	1433_CANAL	1.68	1.17	0
Cas5	Q5AA46_CANAL	1.69	1.67	0
Cas5	Q59RN5_CANAL	1.7	1.46	0
Cas5	Q5AKU8_CANAL-DECOY	1.7	1.46	0
Cas5	Q5A9P1_CANAL	1.7	1.46	0
Cas5	Q5ALX0_CANAL	1.7	1.46	0
Cas5	Q5AFK6_CANAL-DECOY	1.7	1.46	0
Cas5	Q5ABC4_CANAL-DECOY	1.7	1.46	0
Cas5	Q59P37_CANAL	1.7	1.46	0
Cas5	Q5A6I7_CANAL-DECOY	1.7	1.46	0
Cas5	Q5ACU0_CANAL-DECOY	1.7	1.46	0
Cas5	ALS1_CANAL	1.7	1.46	0
Cas5	Q5AEY0_CANAL	1.7	1.46	0
Cas5	Q5AHC9_CANAL	1.7	1.46	0
Cas5	Q5A650_CANAL	1.7	1.46	0
Cas5	Q5ANF1_CANAL	1.7	1.46	0
Cas5	Q5A400_CANAL-DECOY	1.7	1.46	0
Cas5	Q5A436_CANAL	1.7	1.46	0
Cas5	Q5ALL1_CANAL	1.7	1.46	0
Cas5	Q5ANC3_CANAL-DECOY	1.7	1.46	0
Cas5	GEP3_CANAL	1.7	1.46	0
Cas5	Q59QA3_CANAL	1.7	1.46	0
Cas5	Q5A7K2_CANAL-DECOY	1.7	1.46	0
Cas5	Q59TC3_CANAL-DECOY	1.7	1.46	0
Cas5	Q5AHT0_CANAL-DECOY	1.7	1.46	0
Cas5	Q5A3J6_CANAL	1.7	1.46	0
Cas5	Q5AJ65_CANAL	1.7	1.46	0
Cas5	Q59YF3_CANAL	1.7	1.46	0
Cas5	Q59WK5_CANAL [2]	1.74	1.12	0
Cas5	Q59WK5_CANAL	1.74	1.12	0
Cas5	Q59V16_CANAL	1.74	1.52	0
Cas5	Q59LM8_CANAL	1.75	1.15	0
Cas5	Q5AGX8_CANAL	1.75	1.74	0
Cas5	Q5ANN9_CANAL	1.76	1.65	0
Cas5	Q5AAS9_CANAL	1.76	1.68	0
Cas5	Q5A015_CANAL	1.78	1.29	0
Cas5	Q5AL39_CANAL	1.79	1.55	0
Cas5	Q59Q76_CANAL	1.81	1.2	0
Cas5	Q59VH8_CANAL	1.81	1.43	0
Cas5	Q5AB87_CANAL	1.82	1.6	0
Cas5	Q5AHT2_CANAL	1.83	1.64	0
Cas5	Q5A9C0_CANAL	1.86	1.53	0
Cas5	Q59UQ3_CANAL	1.86	1.53	0
Cas5	GDA1_CANAL	1.86	1.53	0
Cas5	Q5A0F6_CANAL	1.86	1.53	0
Cas5	Q5A633_CANAL	1.86	1.53	0
Cas5	Q5A217_CANAL	1.86	1.53	0
Cas5	Q59U78_CANAL	1.87	1.68	0
Cas5	Q59R99_CANAL	1.87	1.68	0
Cas5	Q59PV8_CANAL	1.88	1.55	0
Cas5	Q59ZV2_CANAL	1.89	1.54	0
Cas5	Q5ACG5_CANAL	1.93	1.41	0
Cas5	Q59S68_CANAL	1.93	1.56	0
Cas5	HWP2_CANAL-DECOY	1.93	1.56	0
Cas5	SUS1_CANAL	1.93	1.56	0
Cas5	Q59KR0_CANAL-DECOY	1.93	1.56	0
Cas5	Q5ANA6_CANAL	1.93	1.56	0
Cas5	Q5AFI3_CANAL	1.93	1.56	0
Cas5	Q5A998_CANAL [2]	1.94	1.27	0
Cas5	Q5AD76_CANAL	1.97	1.85	0
Cas5	Q5A937_CANAL	1.99	1.72	0
Cas5	LOC1_CANAL	2.08	1.51	0
Cas5	CWC15_CANAL	2.16	1.95	0
Cas5	Q59RL1_CANAL	2.16	2.13	0
Cas5	Q59LM8_CANAL [2]	2.17	1.67	0
Cas5	Q5AFQ0_CANAL	2.23	2.14	0
Cas5	Q59WR4_CANAL	2.29	1.54	0
Cas5	H2A2_CANAL [2]	2.31	2.24	0
Cas5	Q5AKA8_CANAL	2.32	2.04	0
Cas5	Q59X81_CANAL	2.36	1.54	0
Cas5	Q59X81_CANAL [2]	2.36	1.54	0
Cas5	ROT1_CANAL	2.37	1.99	0
Cas5	Q5A9J9_CANAL	2.39	1.73	0
Cas5	Q5AFX8_CANAL	2.39	1.73	0
Cas5	H2AZ_CANAL	2.4	1.72	0
Cas5	Q5ABU6_CANAL	2.4	1.73	0
Cas5	Q59LP4_CANAL	2.41	1.85	0
Cas5	Q59NB2_CANAL	2.47	1.94	0
Cas5	Q59WC8_CANAL-DECOY	2.53	2.05	0
Cas5	Q59ZE0_CANAL	2.54	2.38	0
Cas5	Q59N81_CANAL	2.56	2.23	0
Cas5	Q59NY8_CANAL	2.57	2.53	0
Cas5	Q5AHD5_CANAL	2.63	2.27	0
Cas5	Q5ABZ2_CANAL	2.63	2.27	0
Cas5	Q5A799_CANAL	2.66	2.52	0
Cas5	Q5ACQ4_CANAL	2.87	2.32	0
Cas5	Q5ABC9_CANAL	2.95	2.3	0
Cas5	RUVB2_CANAL	2.95	2.94	0
Cas5	Q5ALN2_CANAL	3.04	2.27	0
Cas5	Q59LL3_CANAL	3.09	2.52	0
Cas5	DAD2_CANAL-DECOY	3.1	1.94	0
Cas5	Q5ACU9_CANAL	5.73	5.33	0
Cas5	Q5APP0_CANAL	12.95	12.91	0
Cas5	Q5AMH6_CANAL	80.84	64.28	0
